# Supplementary material for: Gene expression imputation and cell-type deconvolution in human brain with spatiotemporal precision and its implications for brain-related disorders
Source: HighWire-hosted journal article supplement (doi:10.1101/gr.265769.120), 2020-12-03
Supplement: Supplemental_Fig_S1.pdf [file Supplemental_Fig_S1.pdf]

# Raw BrainSpan data imputation

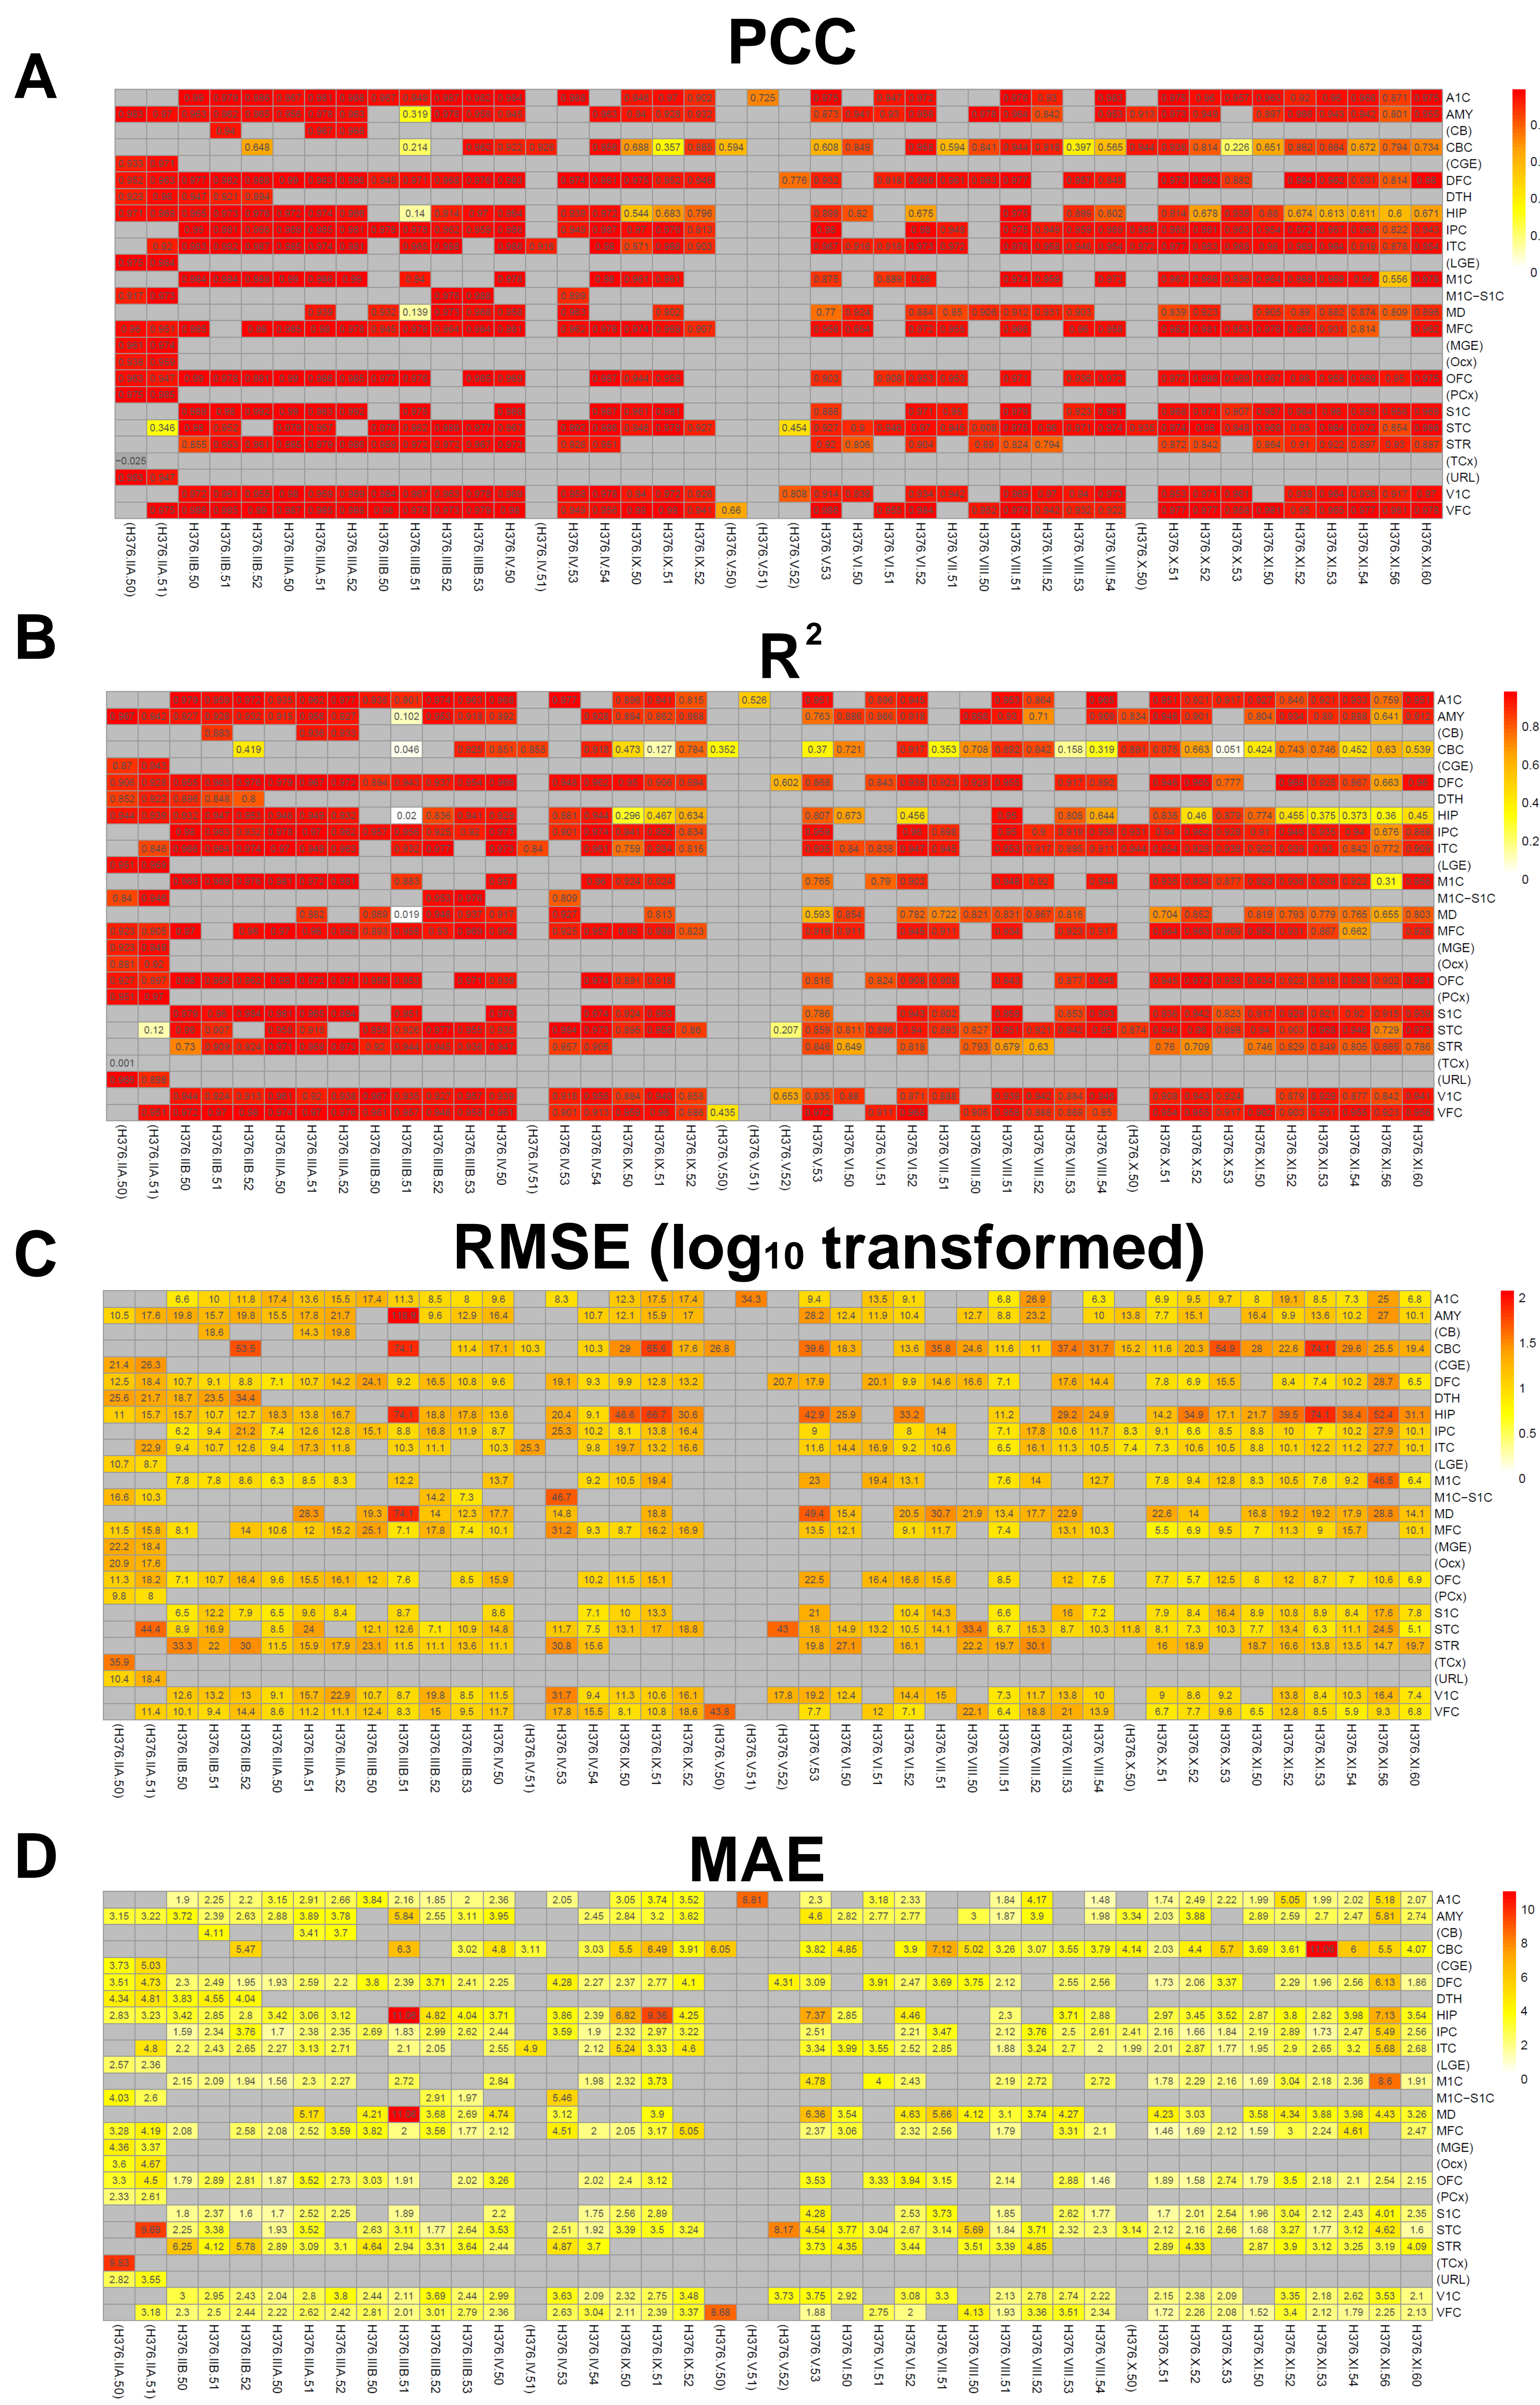

# Working BrainSpan data imputation

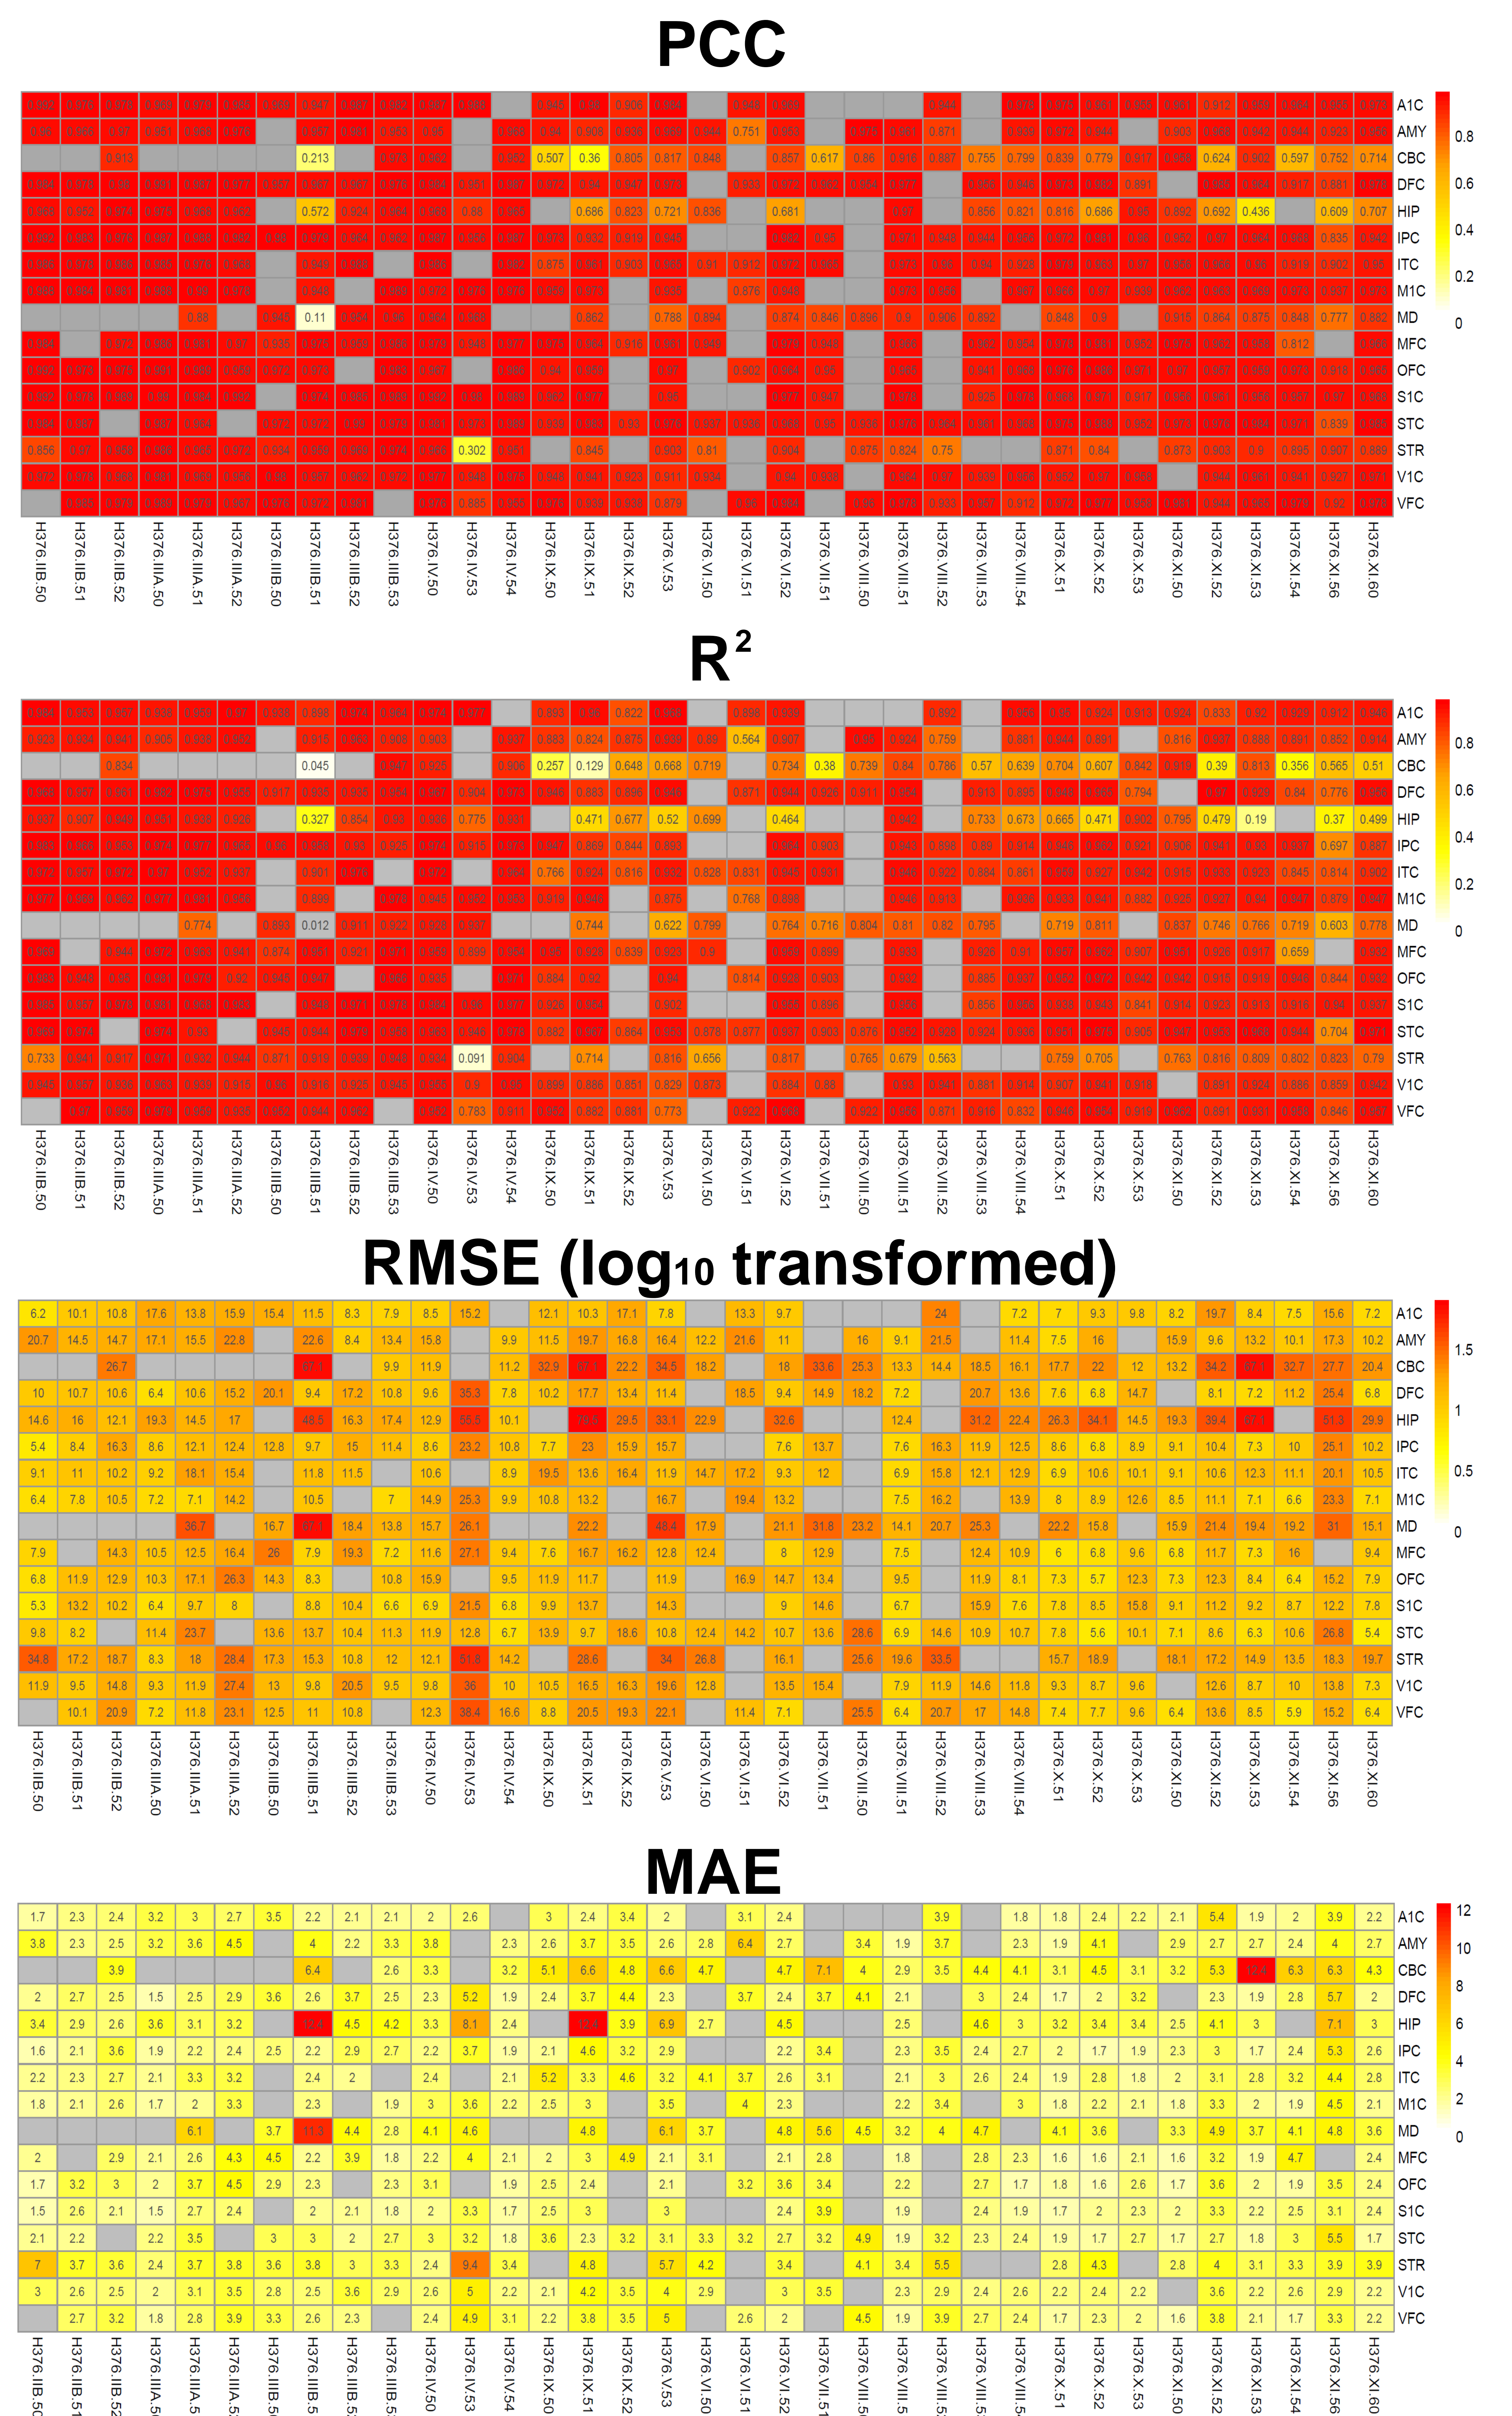

**Supplemental Fig. S1.** Tensor imputation performance evaluation between raw and working BrainSpan data sets by leave-one-out strategy (rows and columns name in raw dataset with parentheses were removed in working dataset). **A**, Pearson correlation coefficient (PCC). **B**, R-squared ( $R^2$ ). **C**, Root Mean Squared Error (RMSE). **D**, Mean Absolute Error (MAE).  $R^2$  is the proportion of variation in the outcome that is explained by the predictor variables. RMSE is the average squared difference between the observed actual outcome values and the values predicted by the model. MAE is the average absolute difference between observed and predicted outcomes.
