# Supplementary material for: Gene expression imputation and cell-type deconvolution in human brain with spatiotemporal precision and its implications for brain-related disorders
Source: HighWire-hosted journal article supplement (doi:10.1101/gr.265769.120), 2020-12-03
Supplement: Supplemental_Fig_S2.pdf [file Supplemental_Fig_S2.pdf]

**A**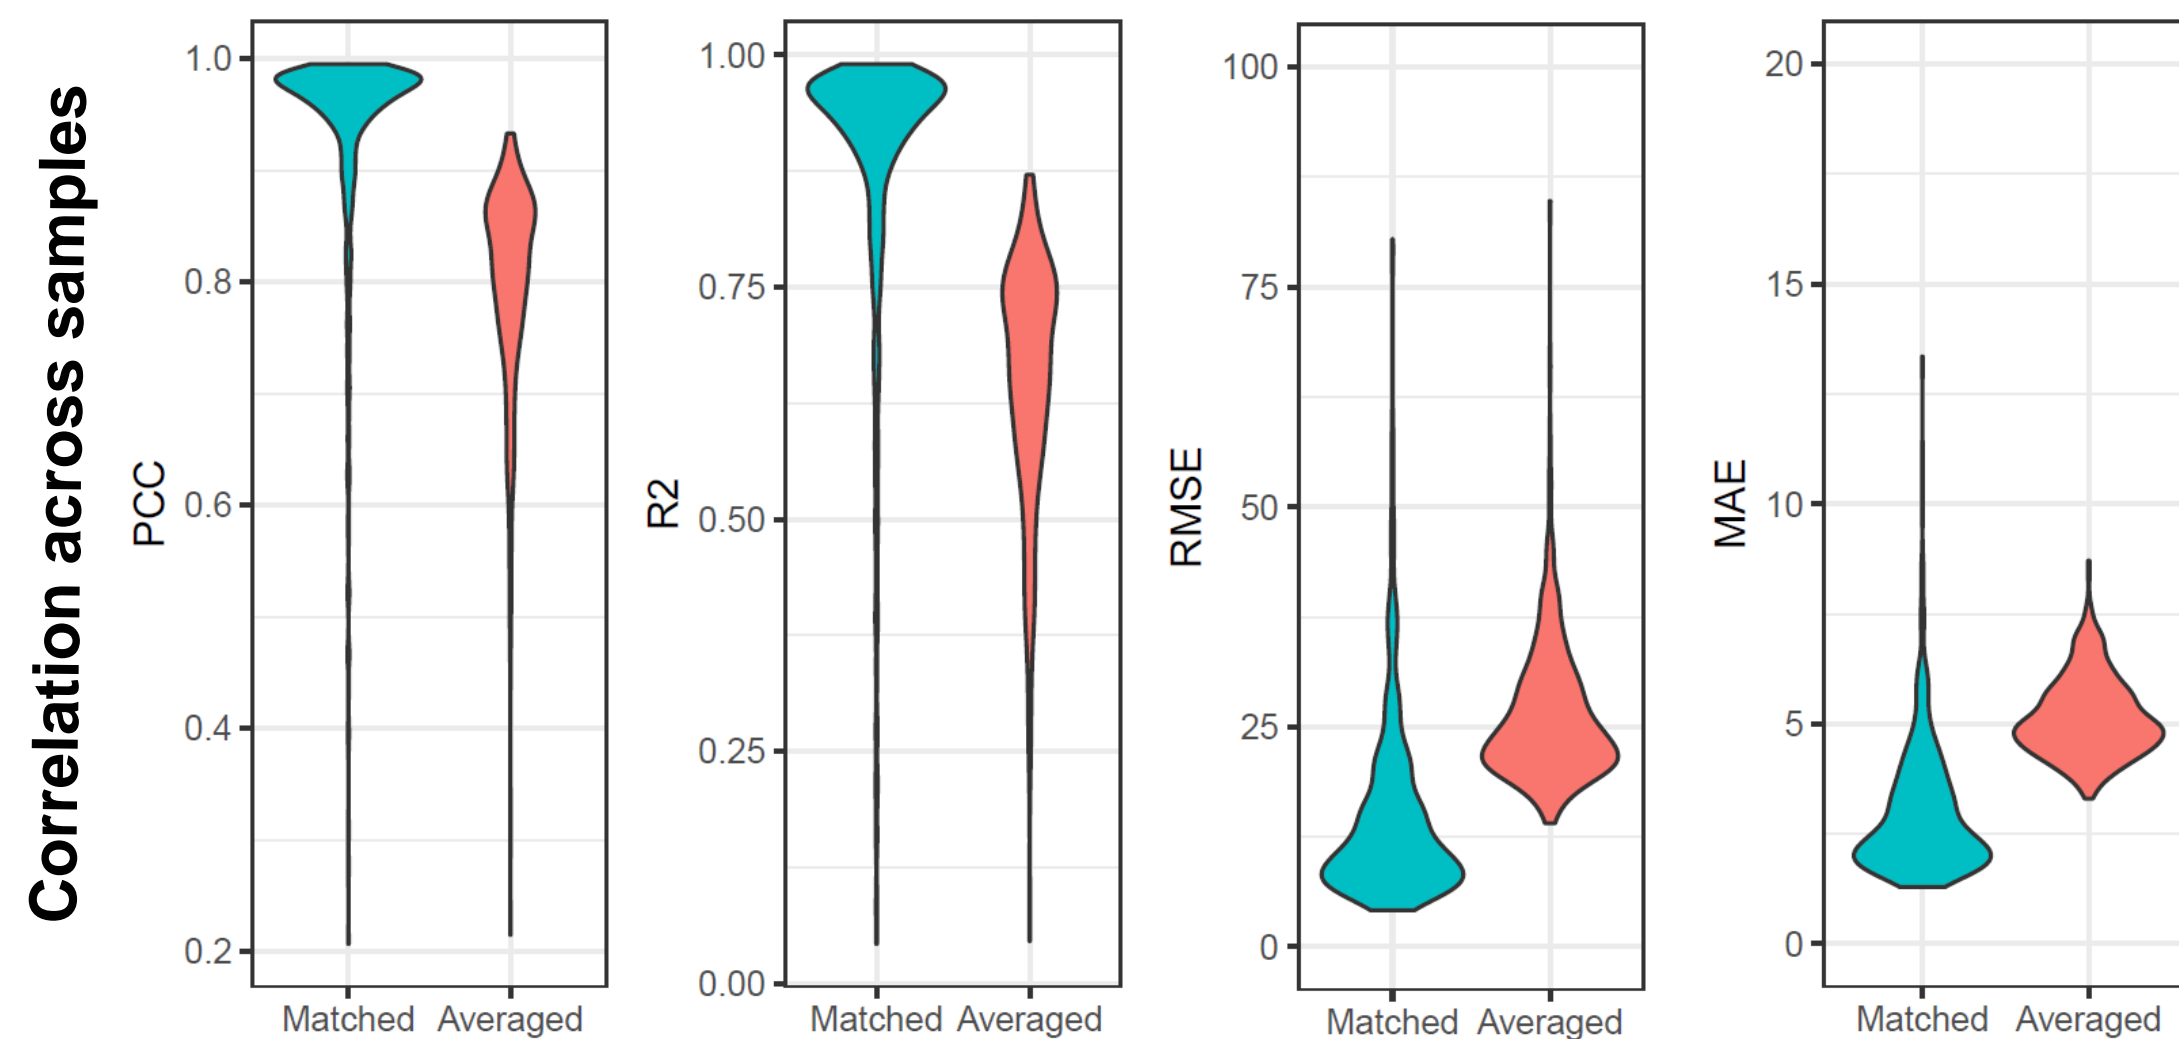**B**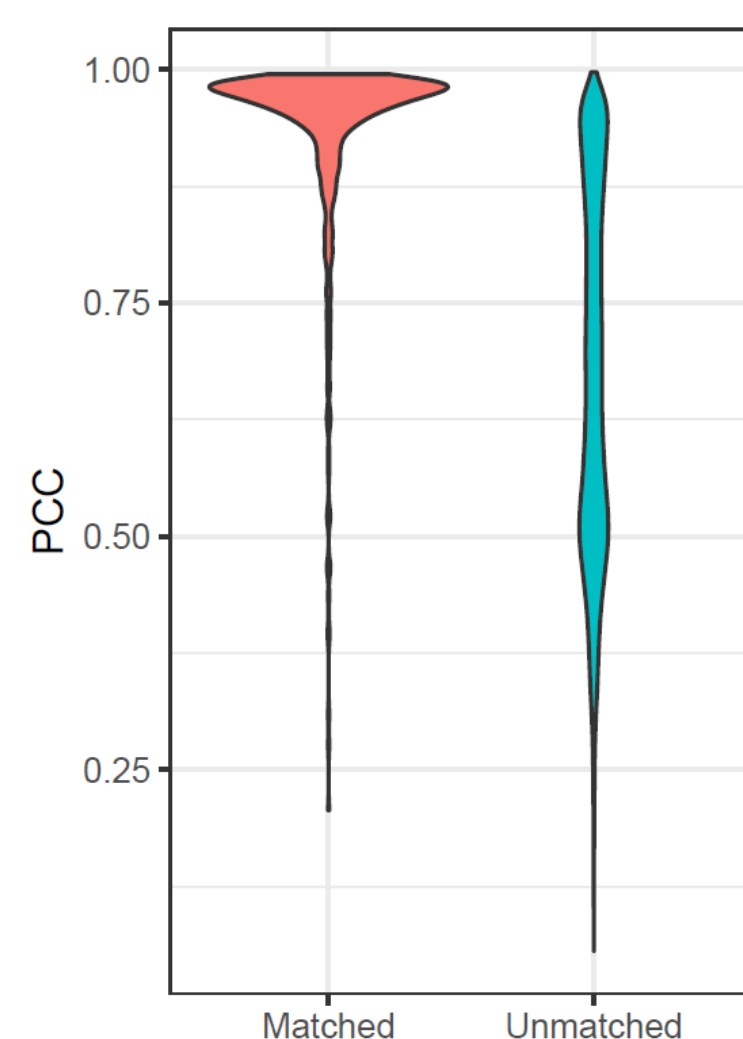**C**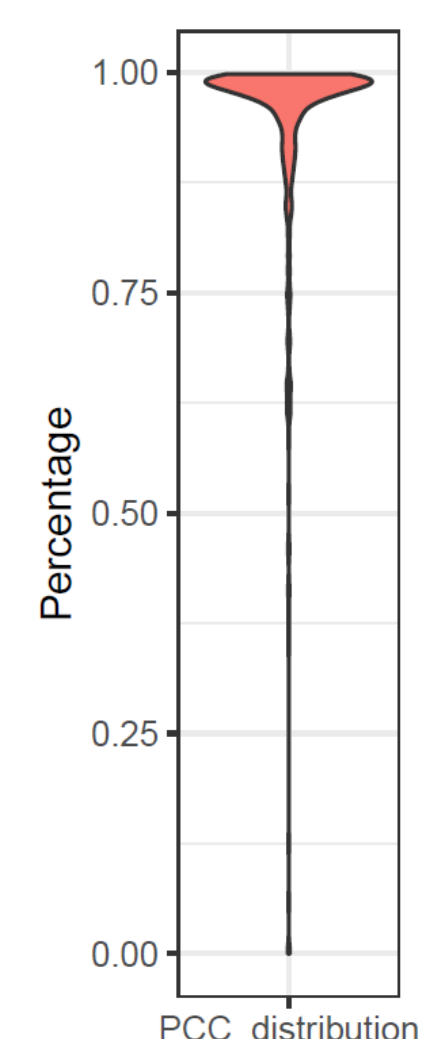**D**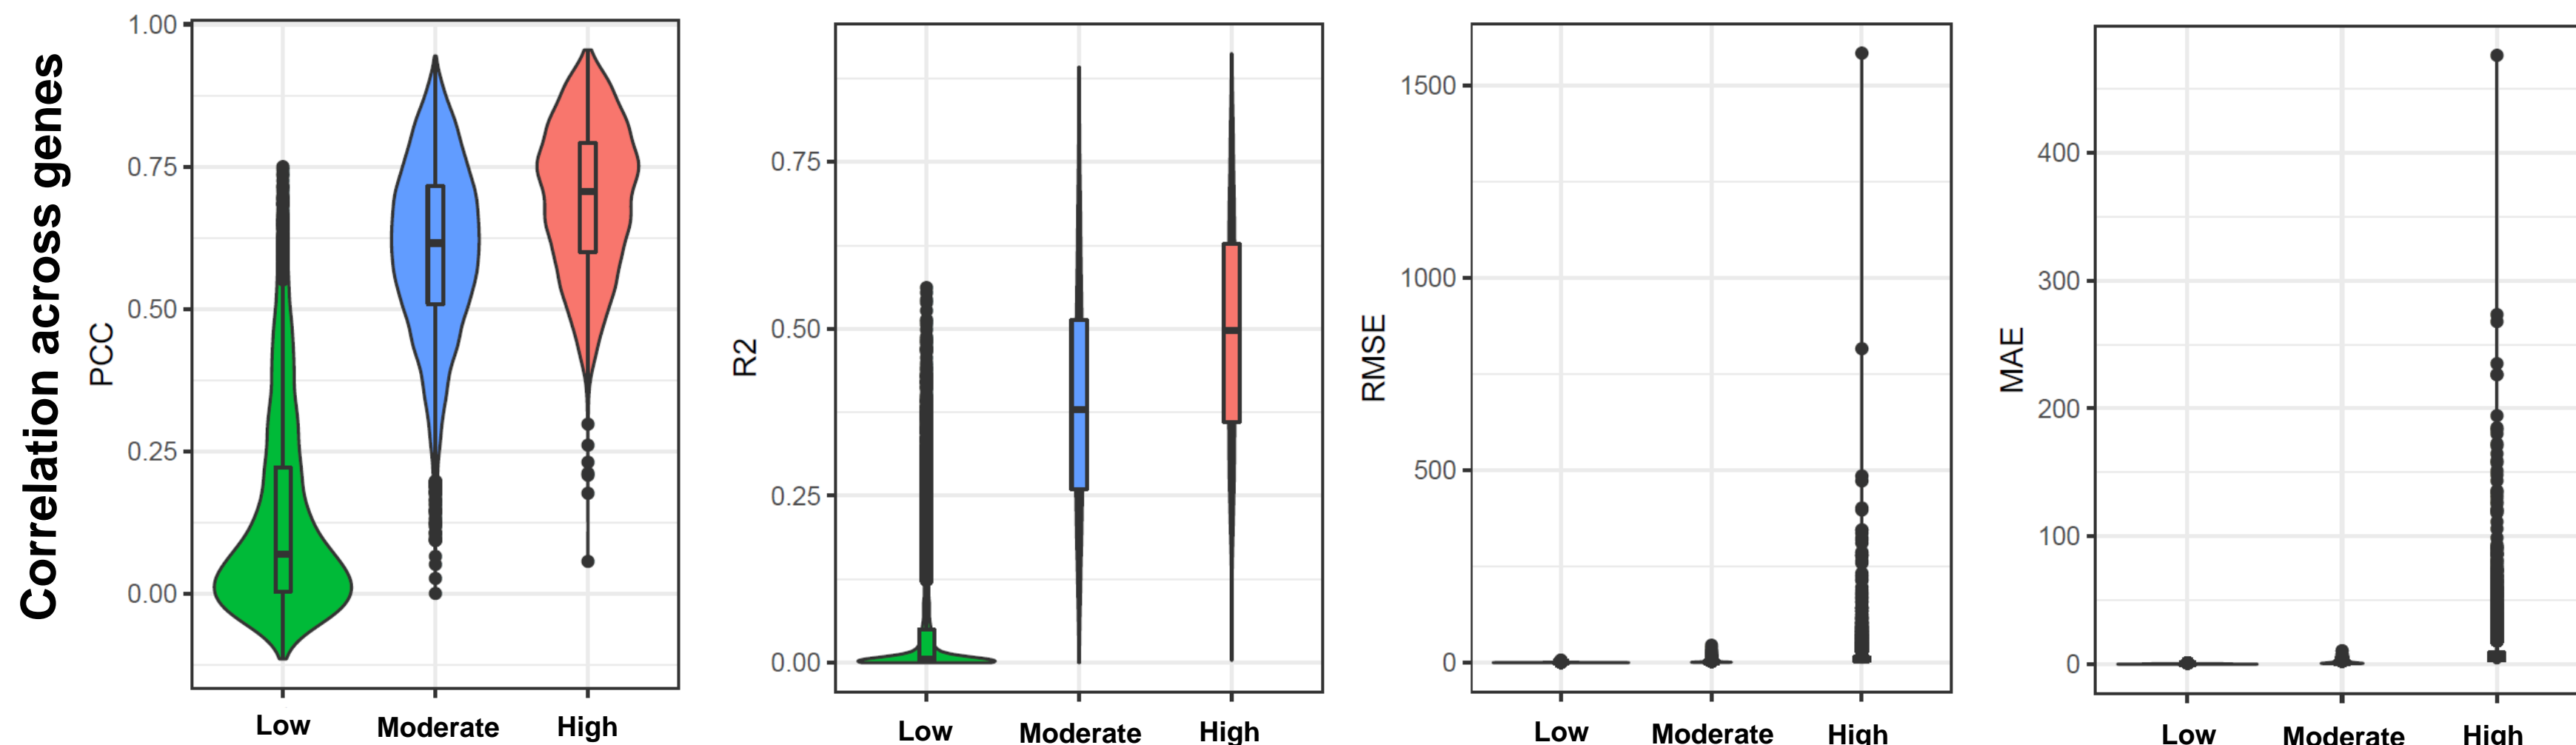

**Supplemental Fig. S2.** Tensor imputation performance statistics on working BrainSpan data set. **A**, PCC, R<sup>2</sup>, RMSE and MAE comparison between imputed results with itself (matched the correct pair) against the average gene expression profiles. **B**, PCC comparison between imputed results with itself (matched the correct pair) against the correlation values with all the other samples (the incorrect pairs). **C**, the distribution of PCC for imputed results with itself (matched the correct pair) against the PCC with all samples (both correct and incorrect pairs). **D**, the comparison of PCC, R<sup>2</sup>, RMSE and MAE values between low (FPKM  $\leq 1$ ), moderate ( $1 < \text{FPKM} \leq 10$ ) and high abundance (FPKM  $> 10$ ) genes.
