# Supplementary material for: Gene expression imputation and cell-type deconvolution in human brain with spatiotemporal precision and its implications for brain-related disorders
Source: HighWire-hosted journal article supplement (doi:10.1101/gr.265769.120), 2020-12-03
Supplement: Supplemental_Fig_S3.pdf [file Supplemental_Fig_S3.pdf]

**A**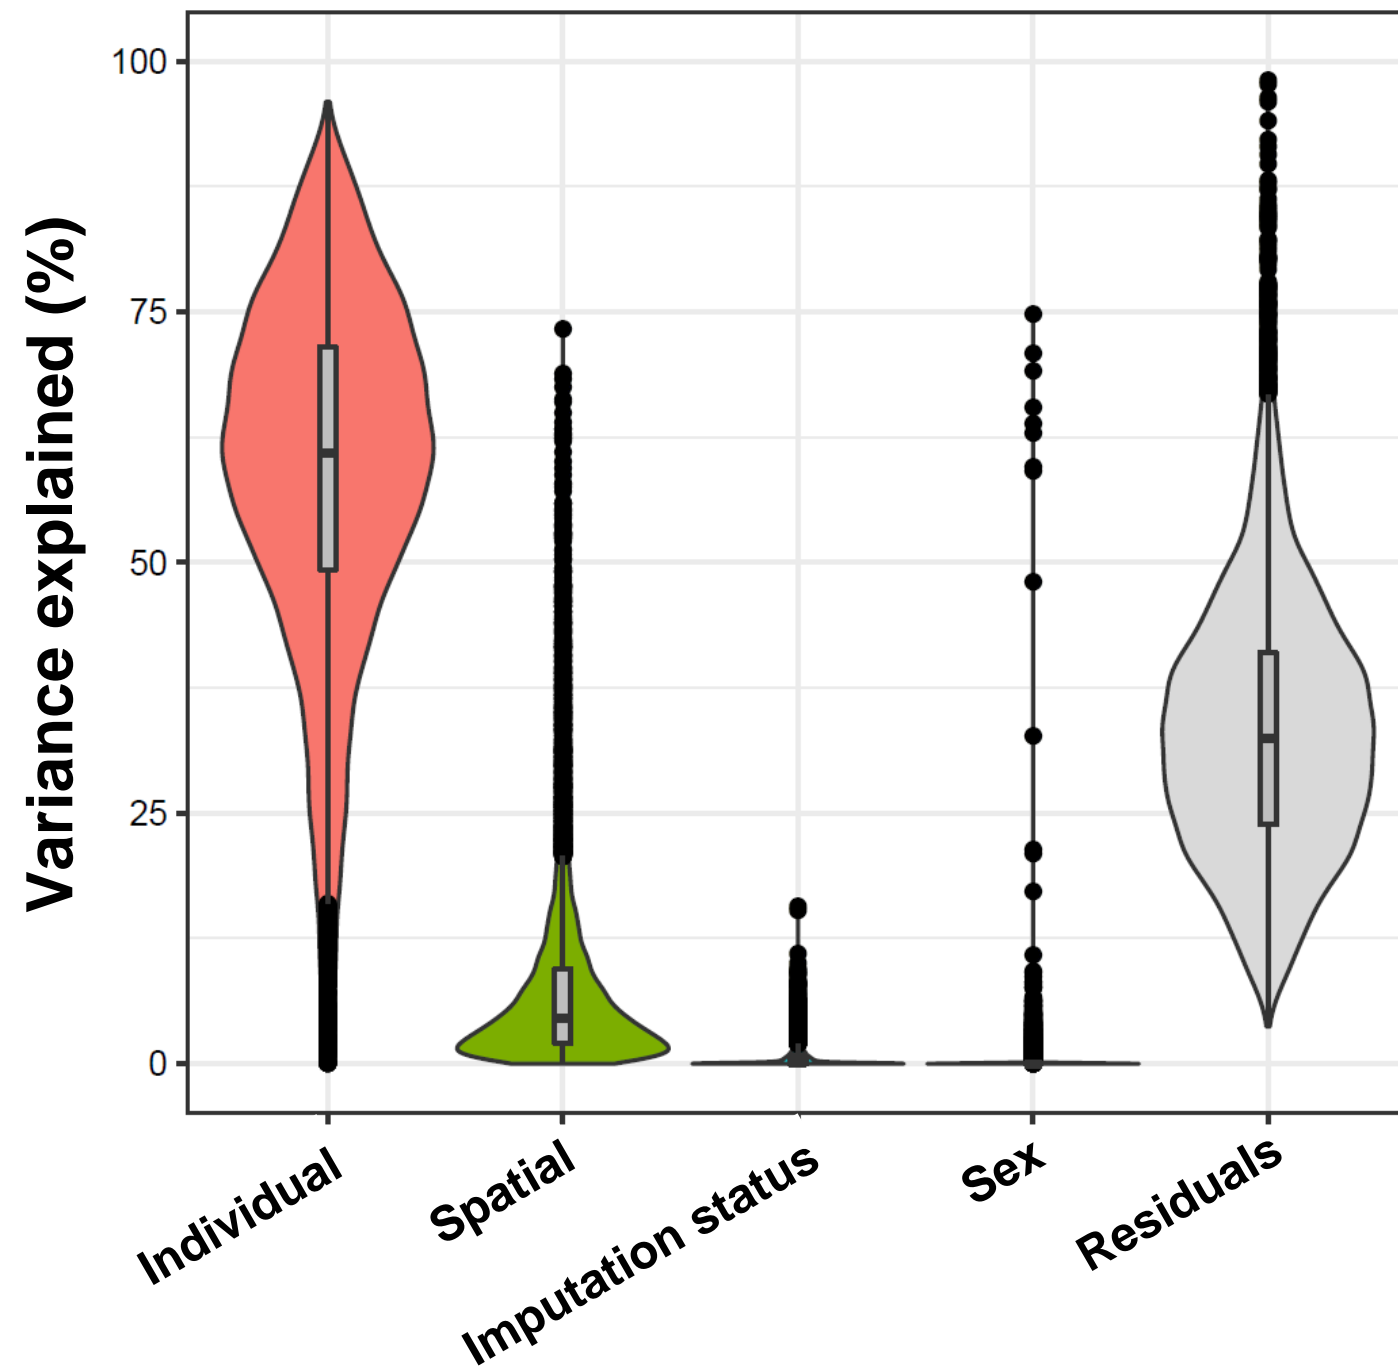**B**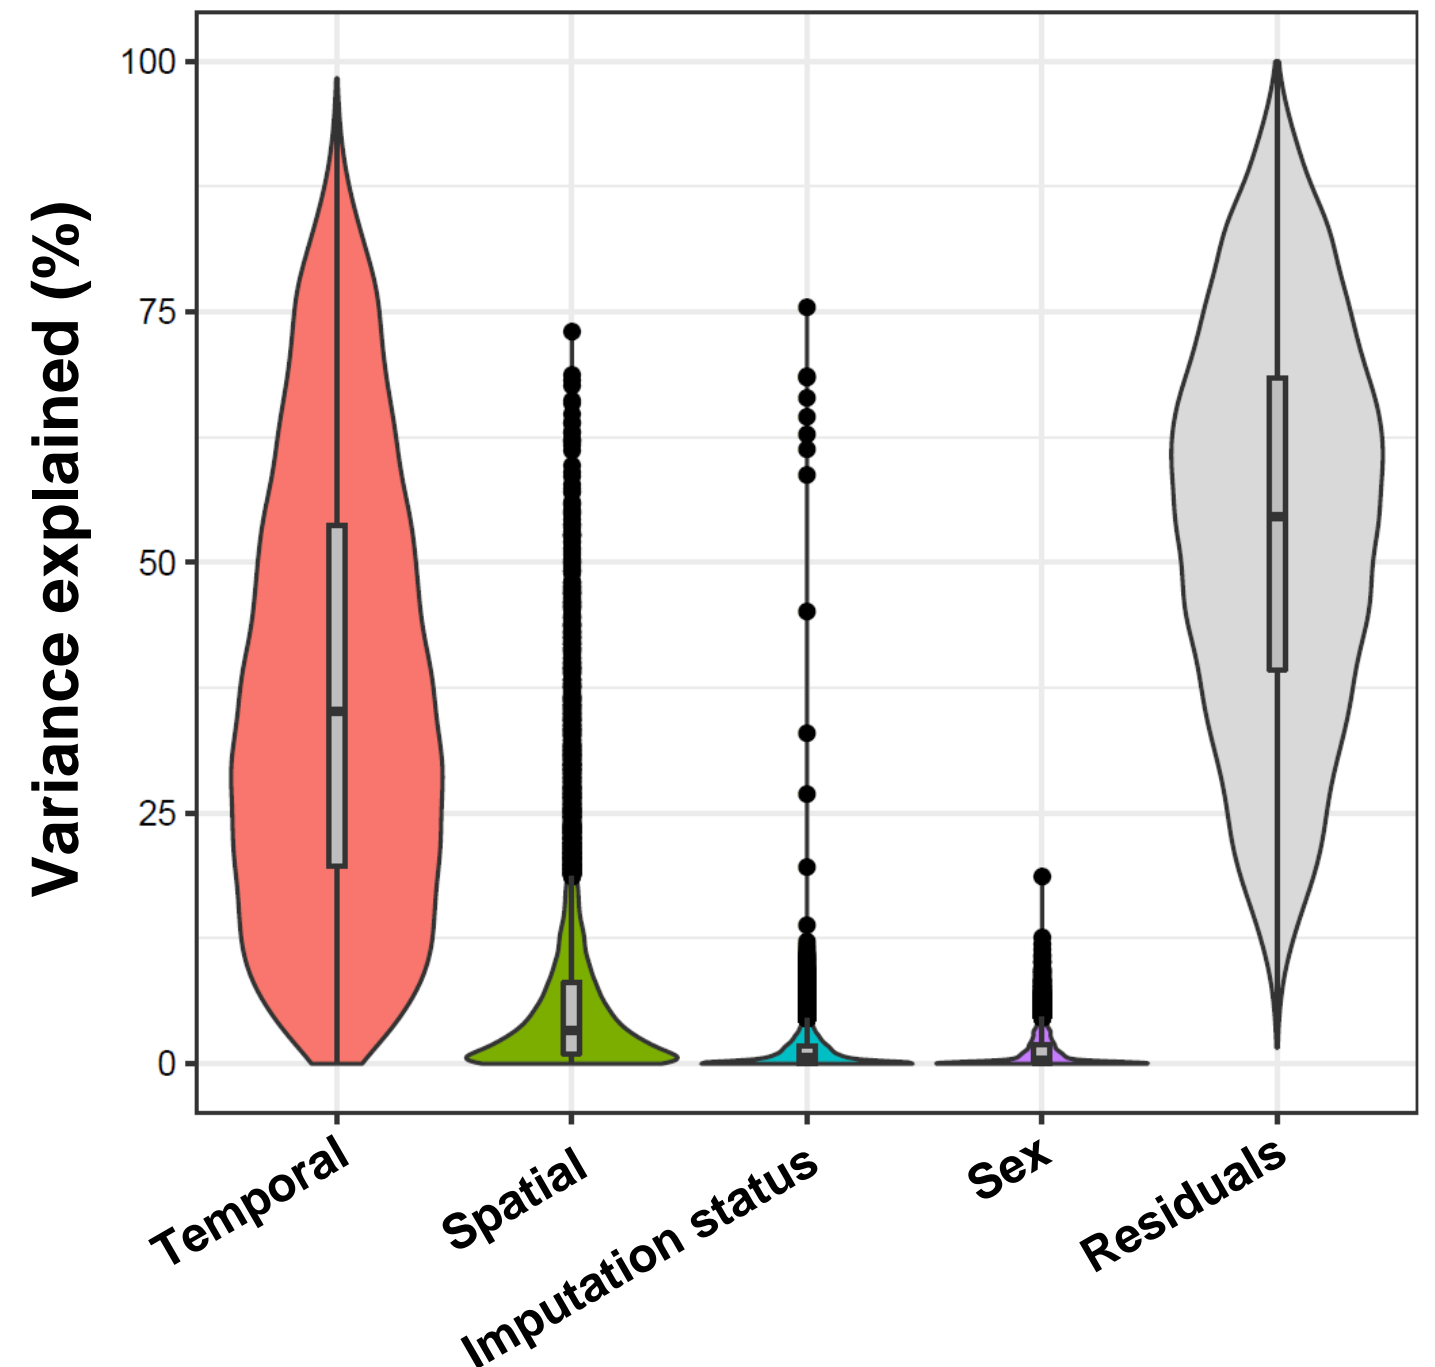

**Supplemental Fig. S3.** Variance partition analysis for working BrainSpan data set. As individual and stage were correlated, independent variance partition analysis were conducted. **A**, factors include individual, spatial, imputation status and sex. **B**, factors include temporal, spatial, imputation status and sex.
