# Supplementary material for: Gene expression imputation and cell-type deconvolution in human brain with spatiotemporal precision and its implications for brain-related disorders
Source: HighWire-hosted journal article supplement (doi:10.1101/gr.265769.120), 2020-12-03
Supplement: Supplemental_Fig_S5.pdf [file Supplemental_Fig_S5.pdf]

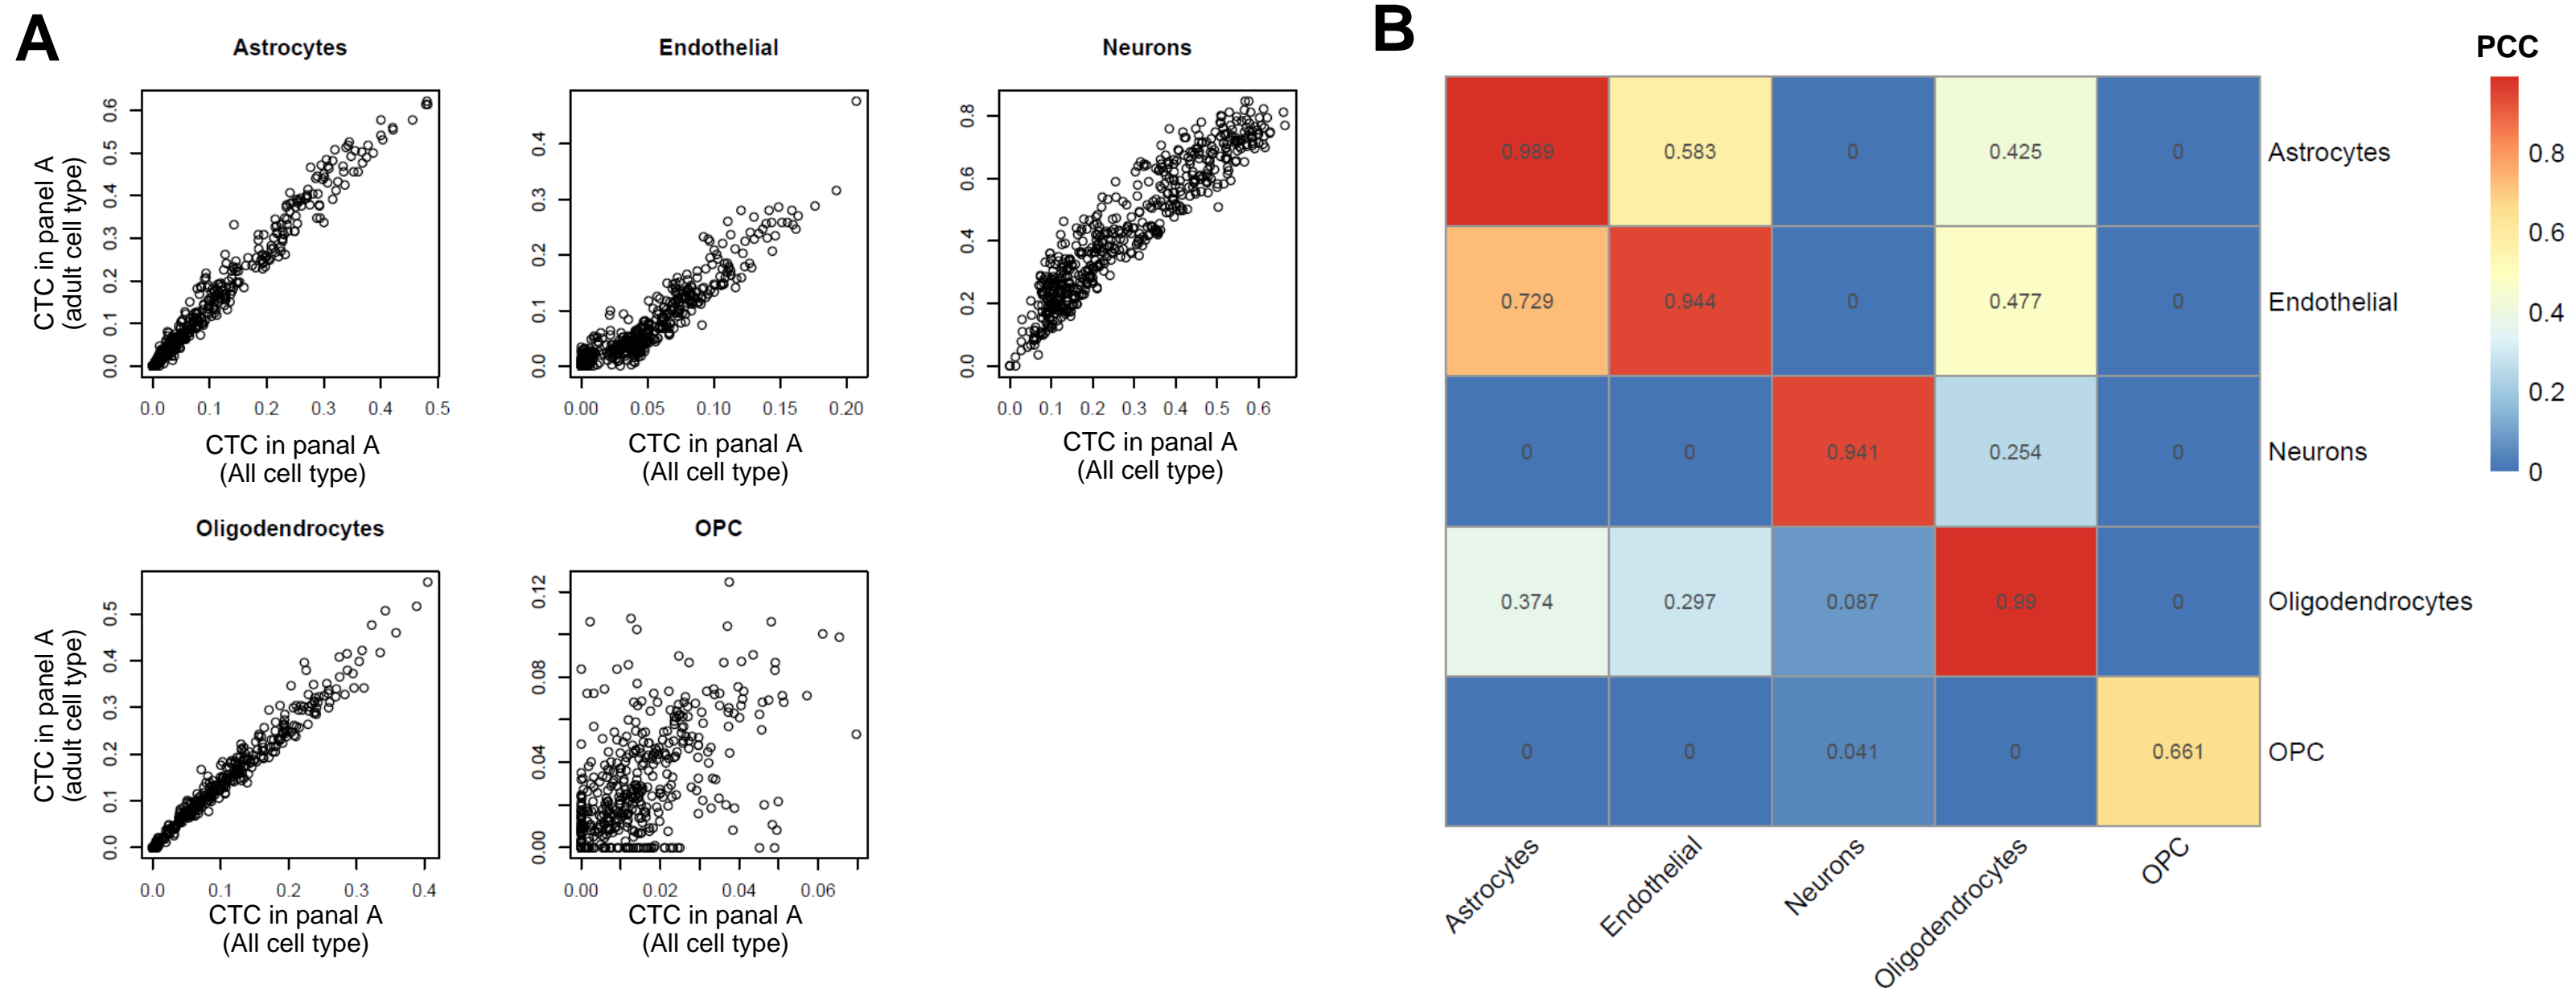

**Supplemental Fig. S5.** Cell type deconvolution results comparison when using a partially complete reference panel. **A**, cell type composition (CTC) score comparison. X-axis is the CTC score derived from both adult and fetal reference panel (all 17 cell types from panel A), y-axis is the CTC score derived from adult reference panel (6 cell types, including astrocytes, microglia, neurons, oligodendrocytes, oligodendrocyte precursor cells (OPC), endothelial cells). **B**, Pearson correlation coefficient of different cell type CTC score when using different cell type reference. Only cell types with an average CTC score > 0.01 were compared.
