# Supplementary material for: Gene expression imputation and cell-type deconvolution in human brain with spatiotemporal precision and its implications for brain-related disorders
Source: HighWire-hosted journal article supplement (doi:10.1101/gr.265769.120), 2020-12-03
Supplement: Supplemental_Fig_S6.pdf [file Supplemental_Fig_S6.pdf]

**A**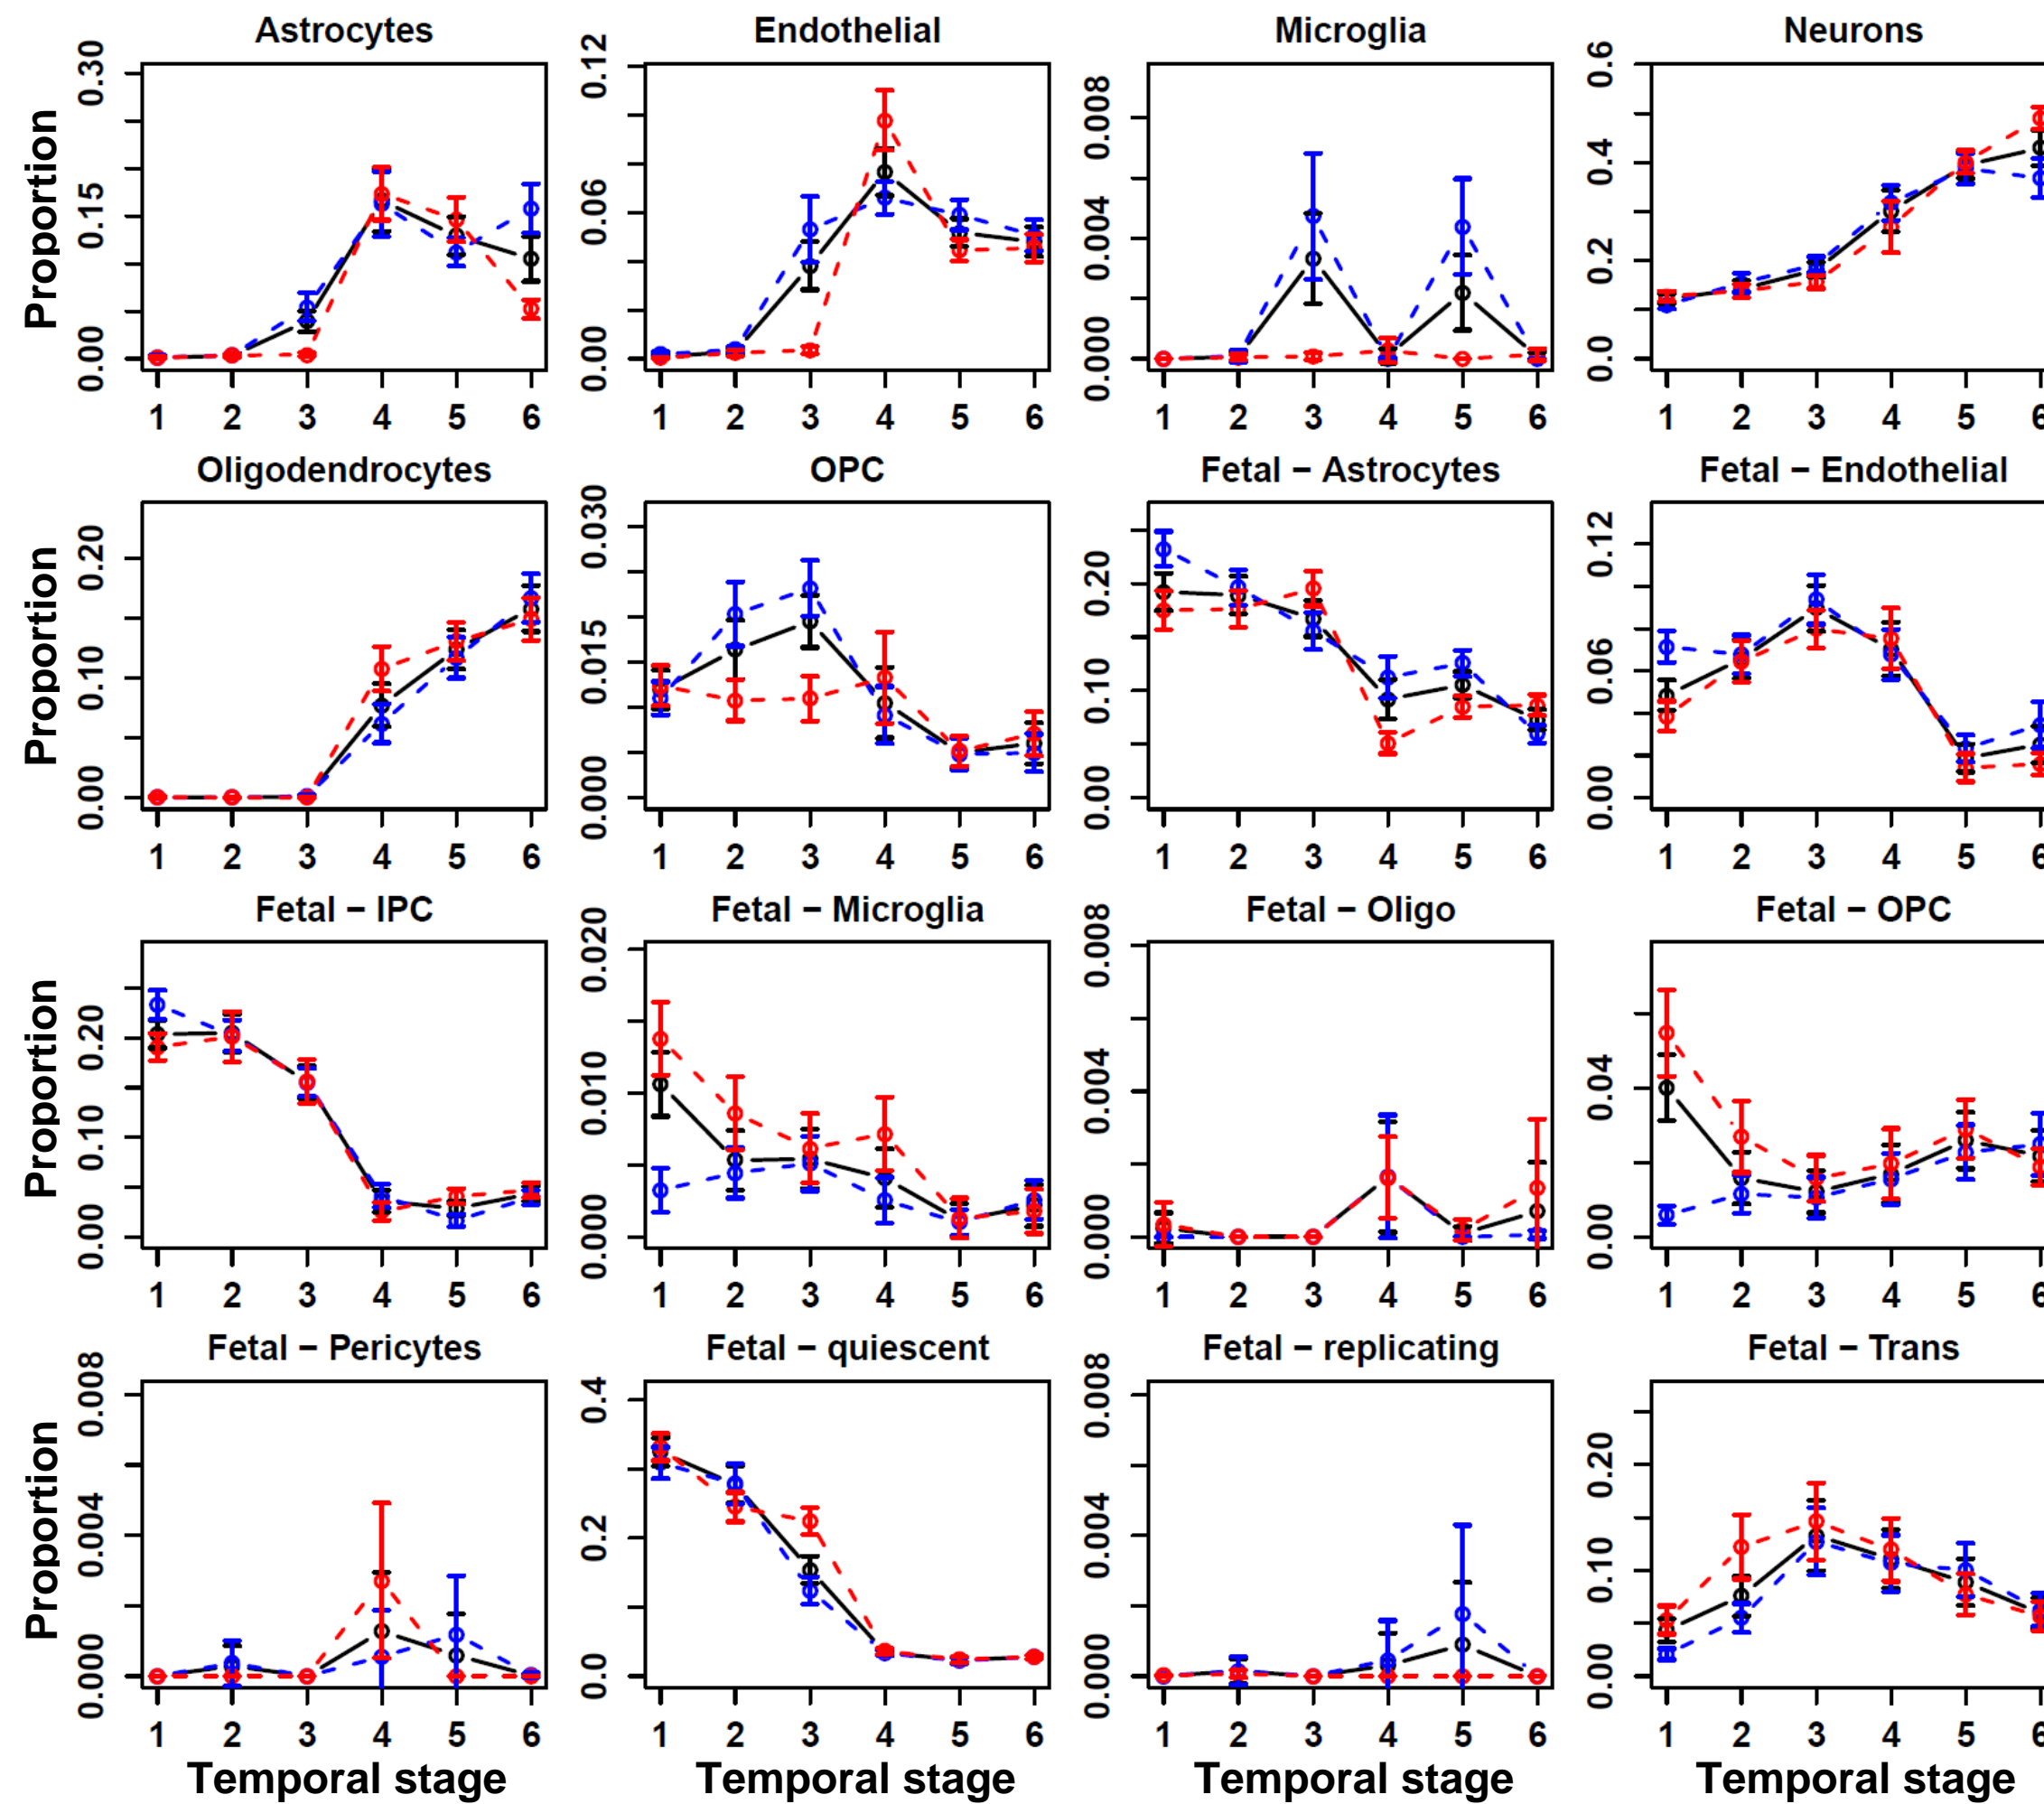**B**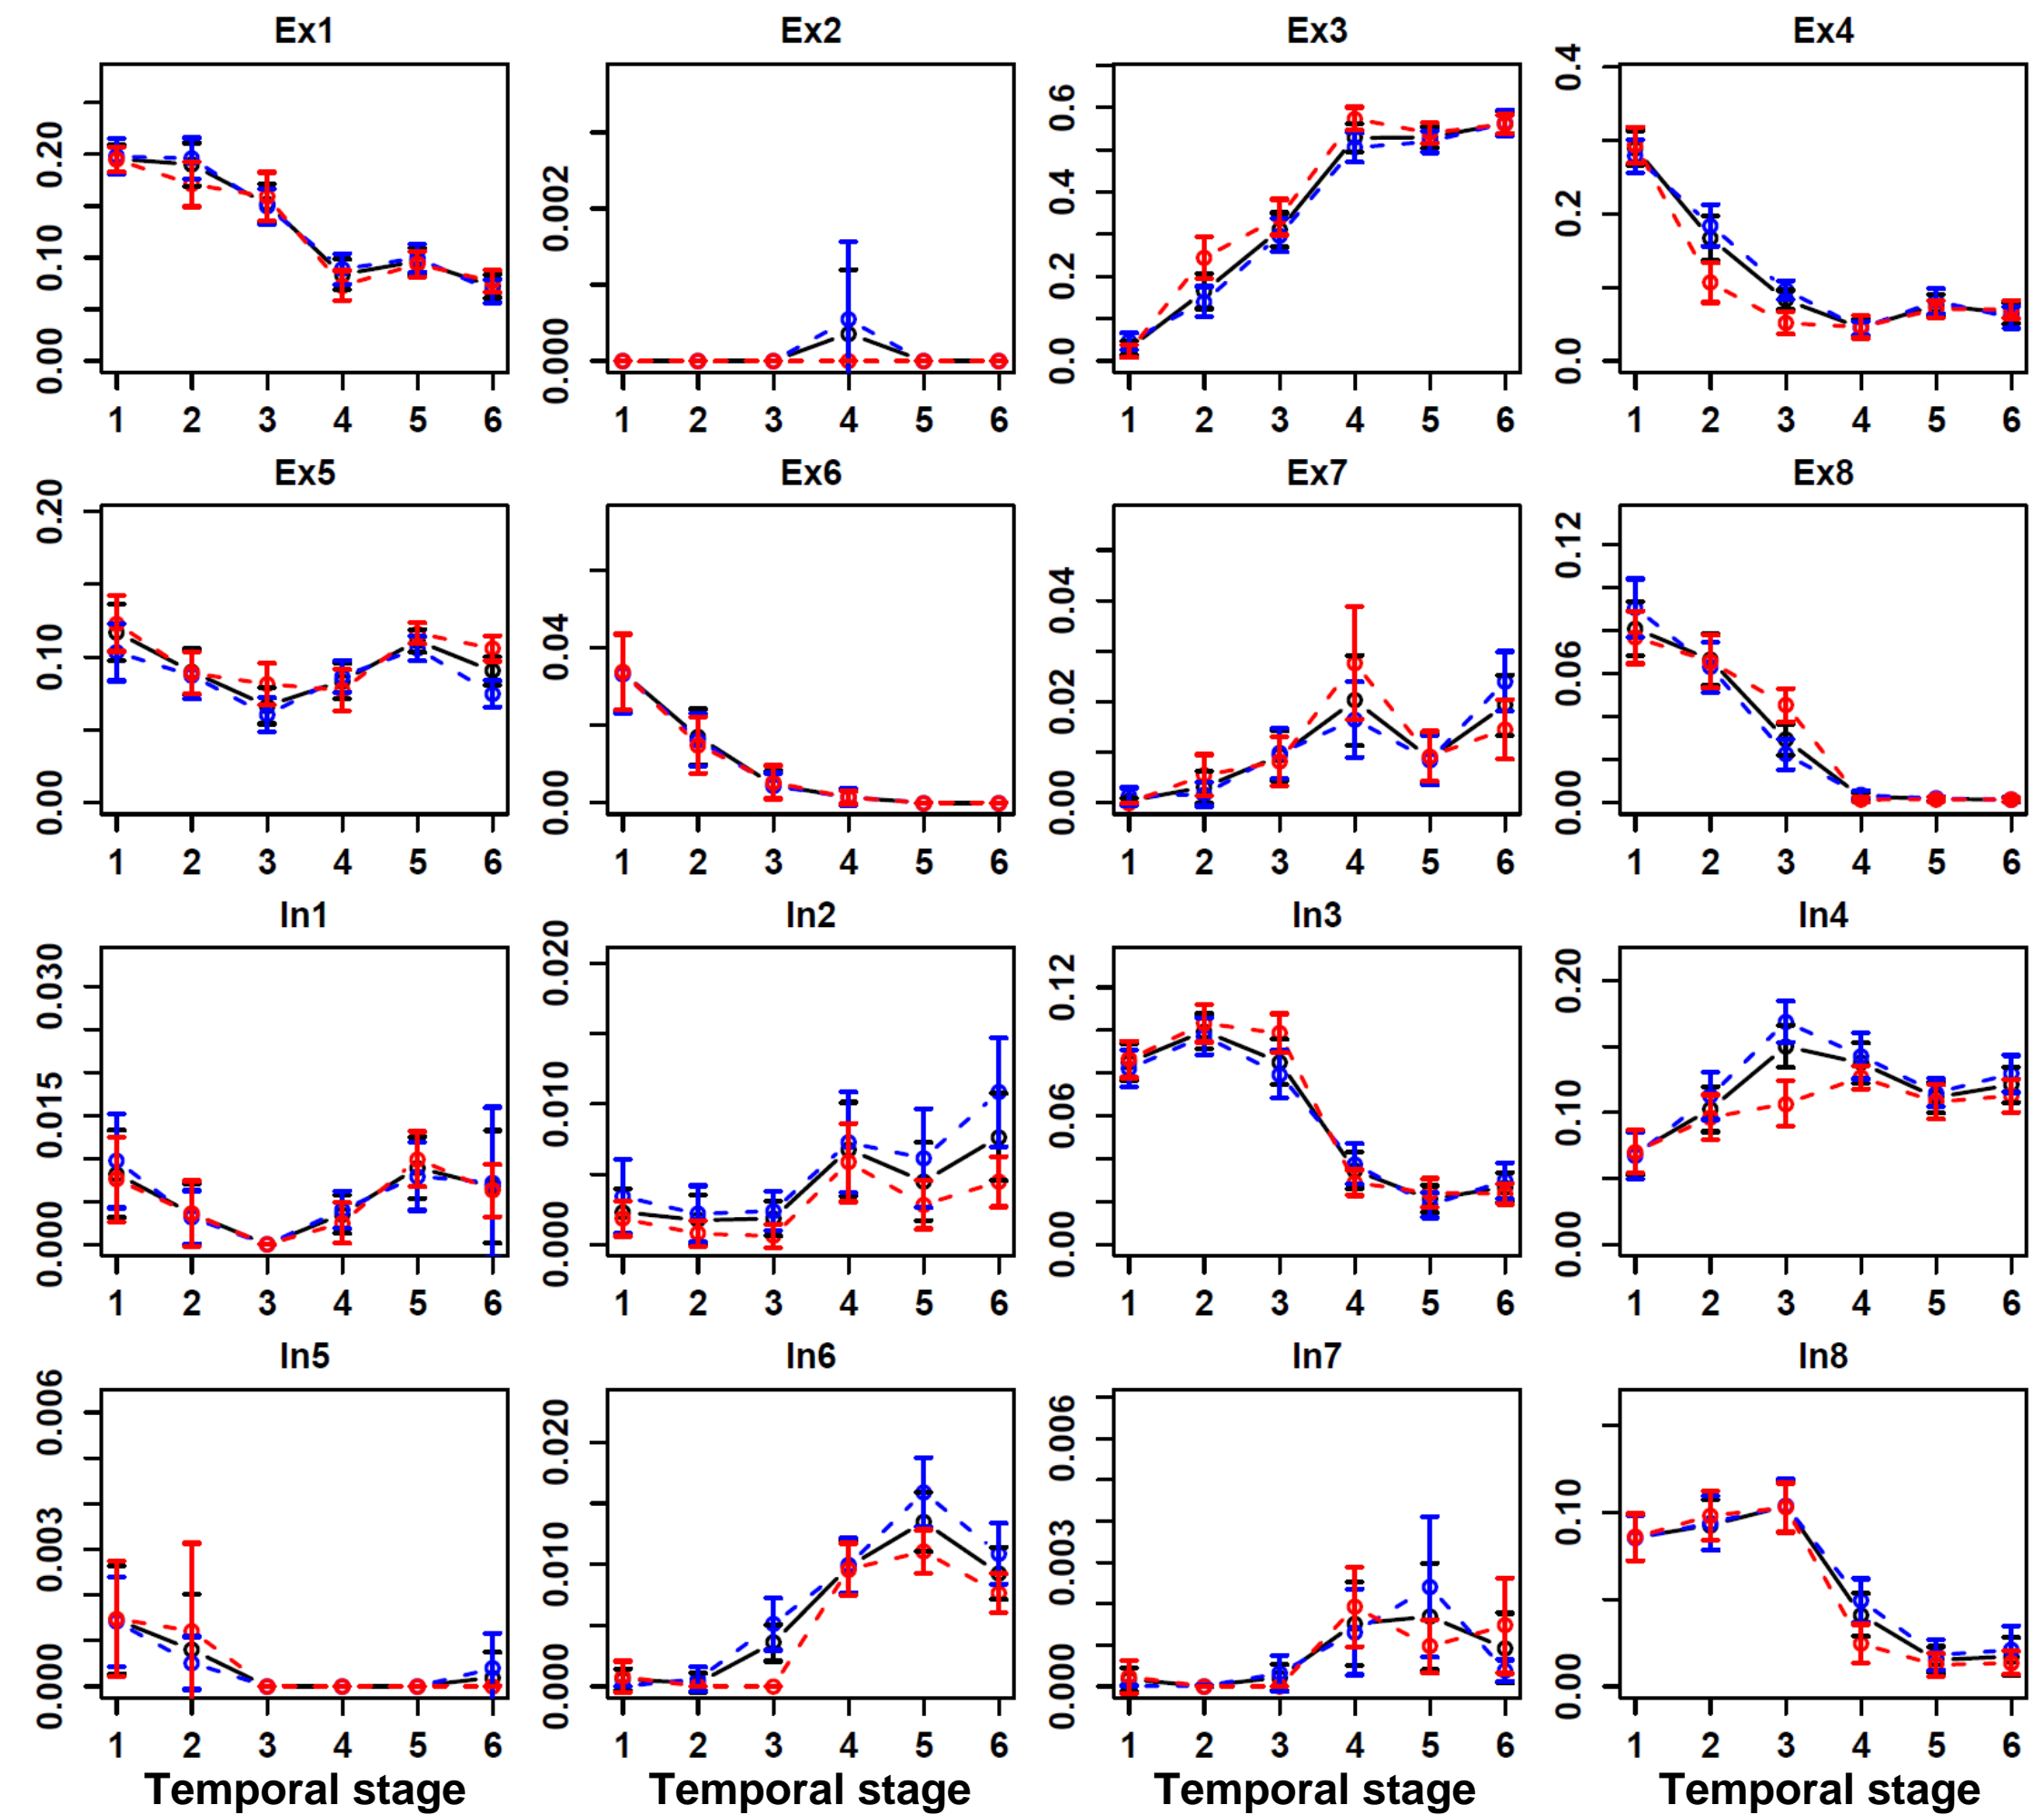

**Supplemental Fig. S6.** Temporal change of different cell type composition base on cell type deconvolution analysis. The black, blue and red lines correspond to average CTC scores in all, male and female group's individual. Error bar refers to the standard deviation of replicates samples. **A**, cell type from panel A. **B**, cell type from panel B.
