# Supplementary material for: Gene expression imputation and cell-type deconvolution in human brain with spatiotemporal precision and its implications for brain-related disorders
Source: HighWire-hosted journal article supplement (doi:10.1101/gr.265769.120), 2020-12-03
Supplement: Supplemental_Fig_S8.pdf [file Supplemental_Fig_S8.pdf]

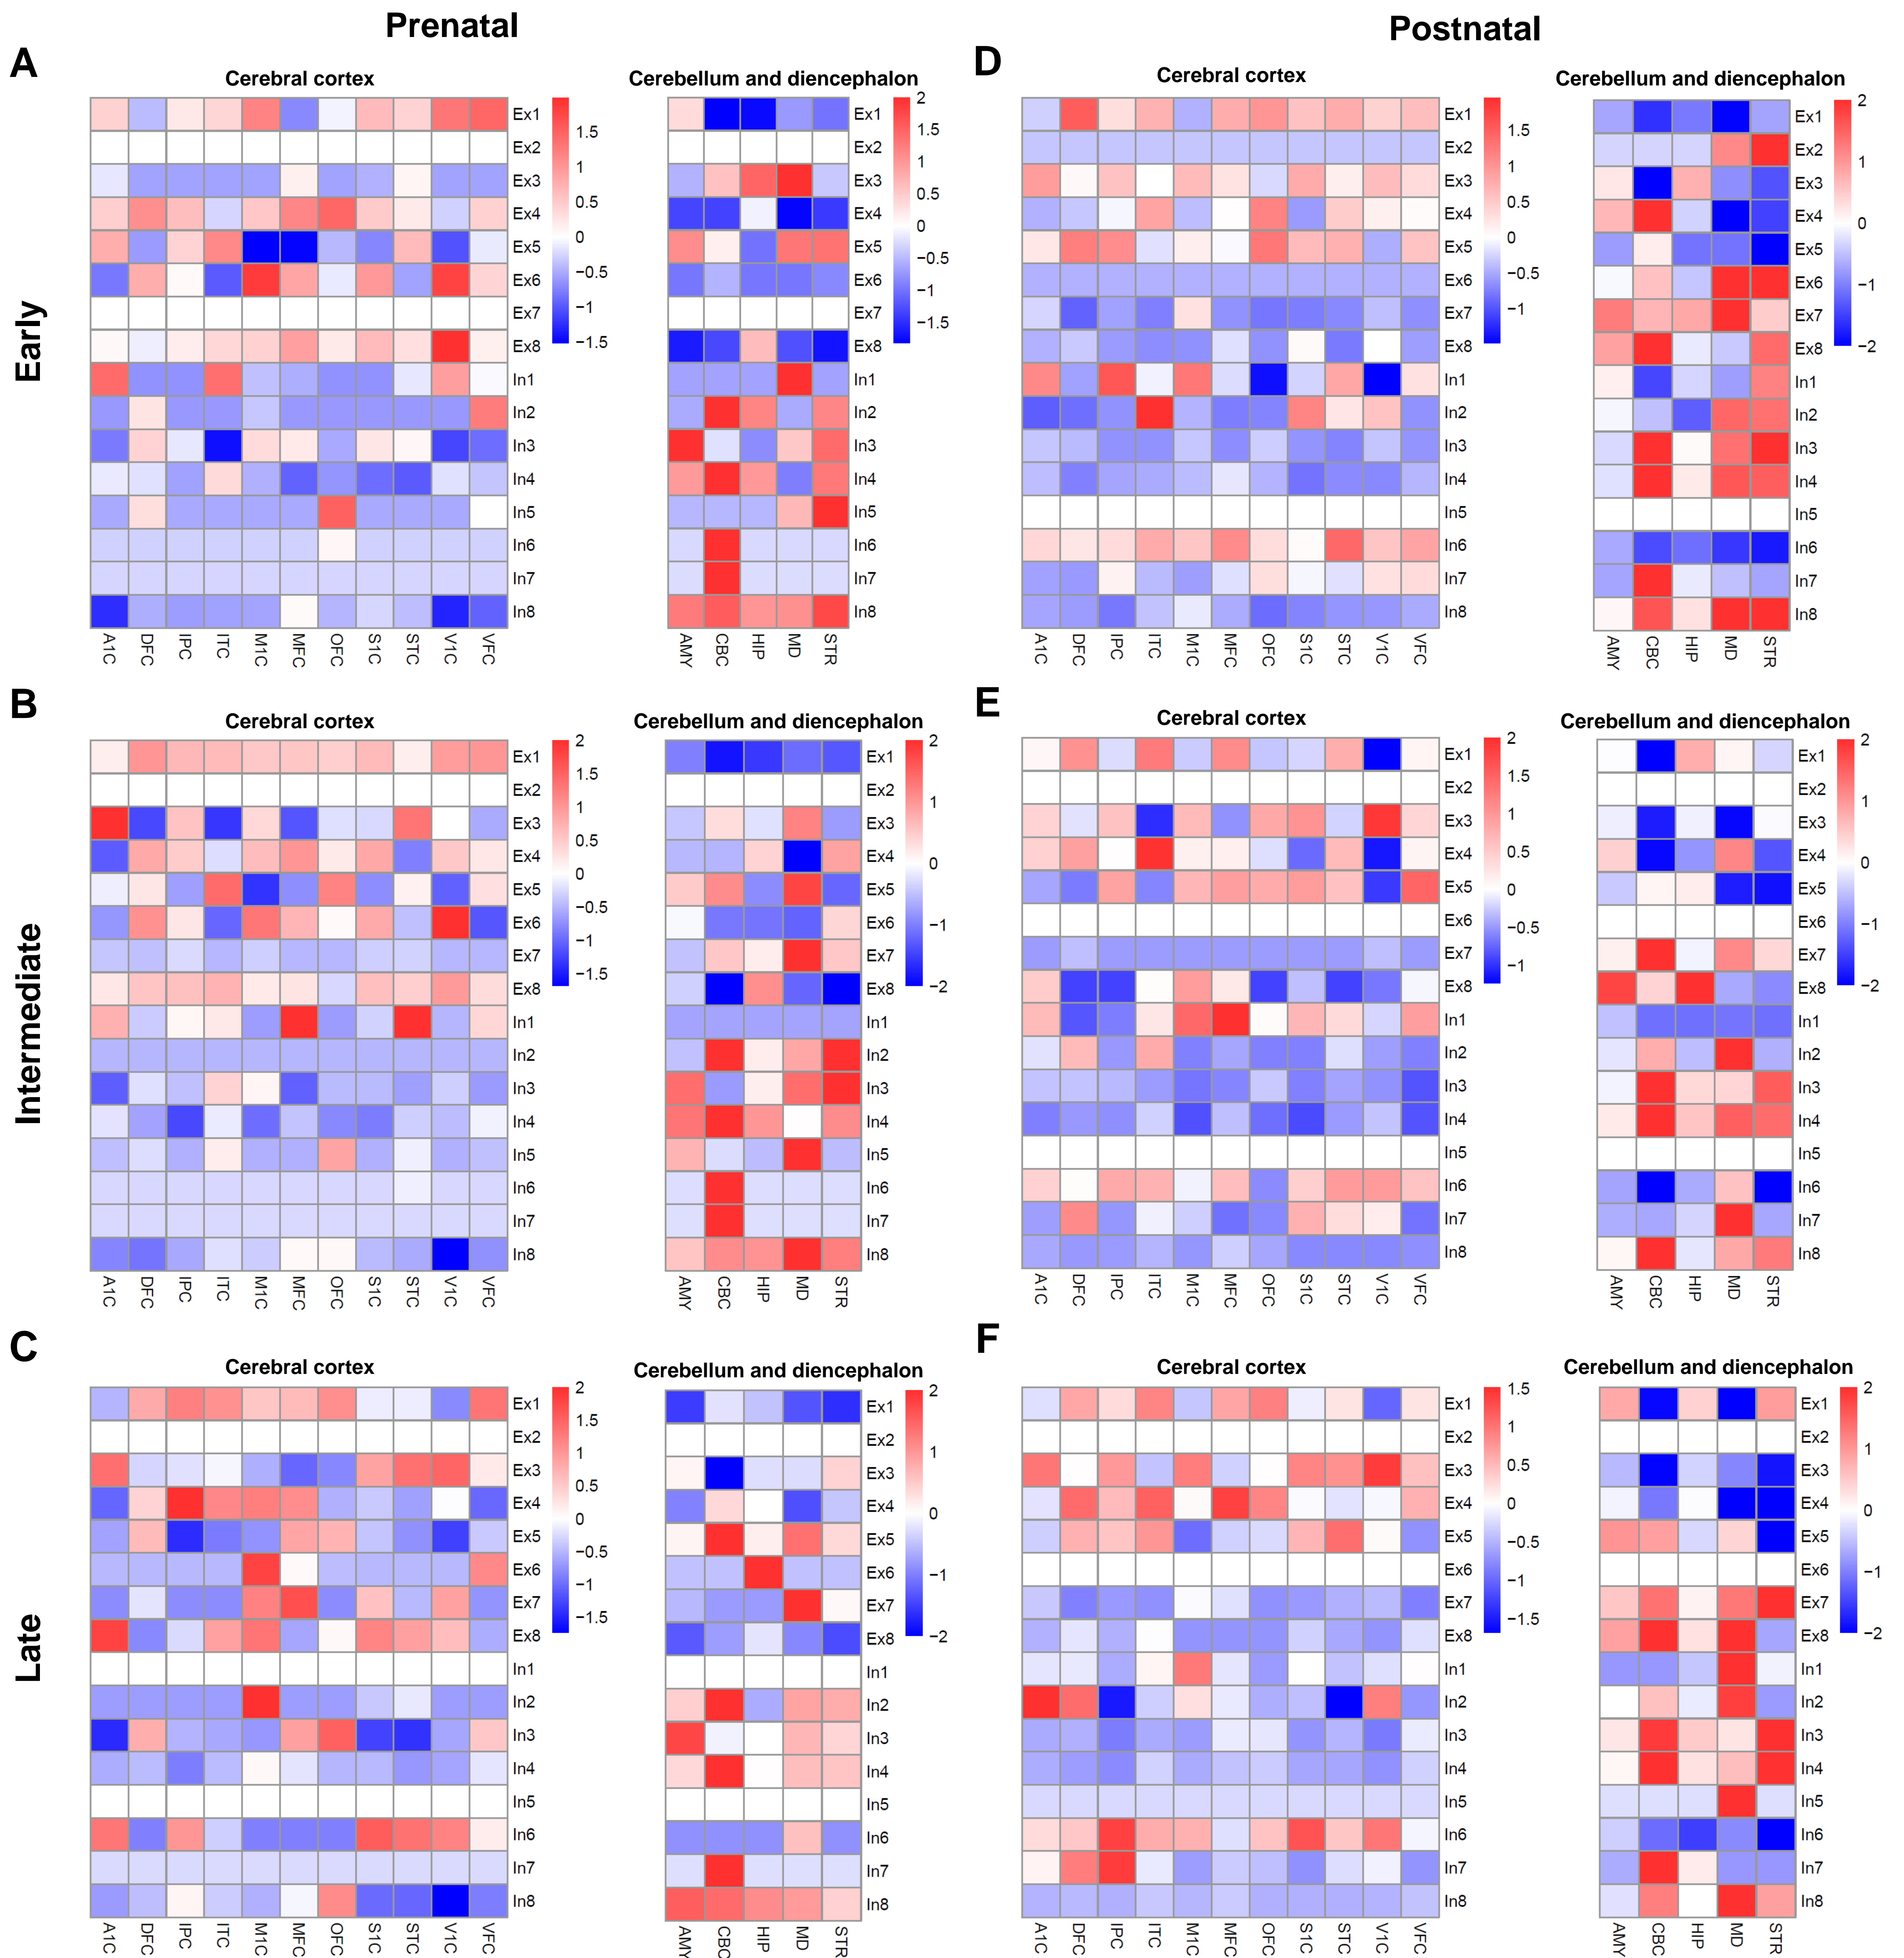

**Supplemental Fig. S8.** Spatial change of different cell type composition for cell types derived from panel B. **A**, early prenatal (before 12 pcw), **B**, intermediate prenatal (from 13 to 21 pcw), **C**, late prenatal (after 24 pcw), **D**, early postnatal (4 months to 4 years), **E**, intermediate postnatal (8 to 13 years), and **F**, late postnatal (18 to 40 years) stages.
