# Supplementary material for: Gene expression imputation and cell-type deconvolution in human brain with spatiotemporal precision and its implications for brain-related disorders
Source: HighWire-hosted journal article supplement (doi:10.1101/gr.265769.120), 2020-12-03
Supplement: Supplemental_Fig_S9.pdf [file Supplemental_Fig_S9.pdf]

**A**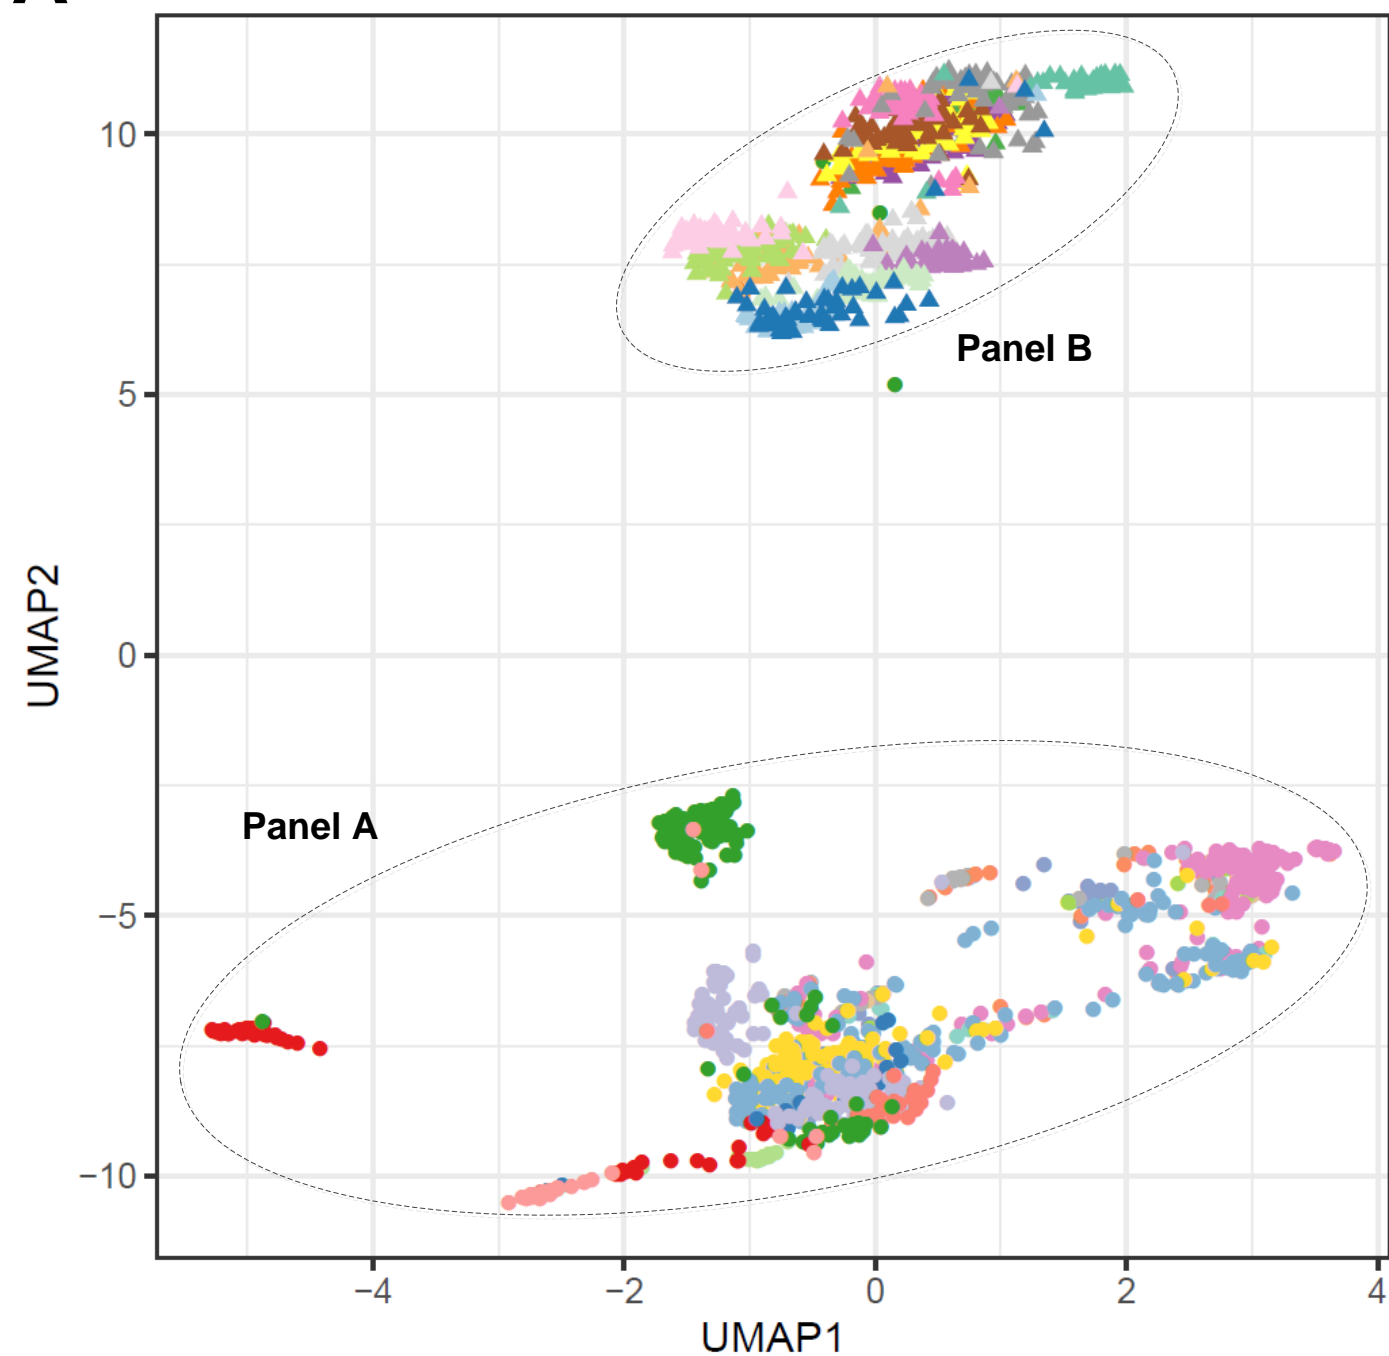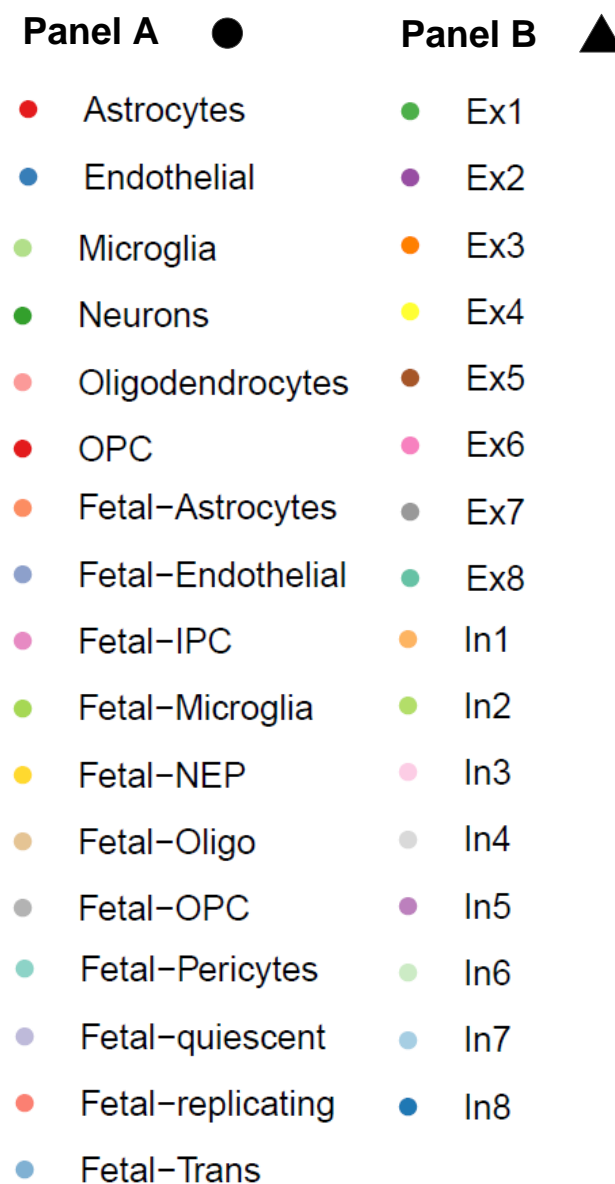**B**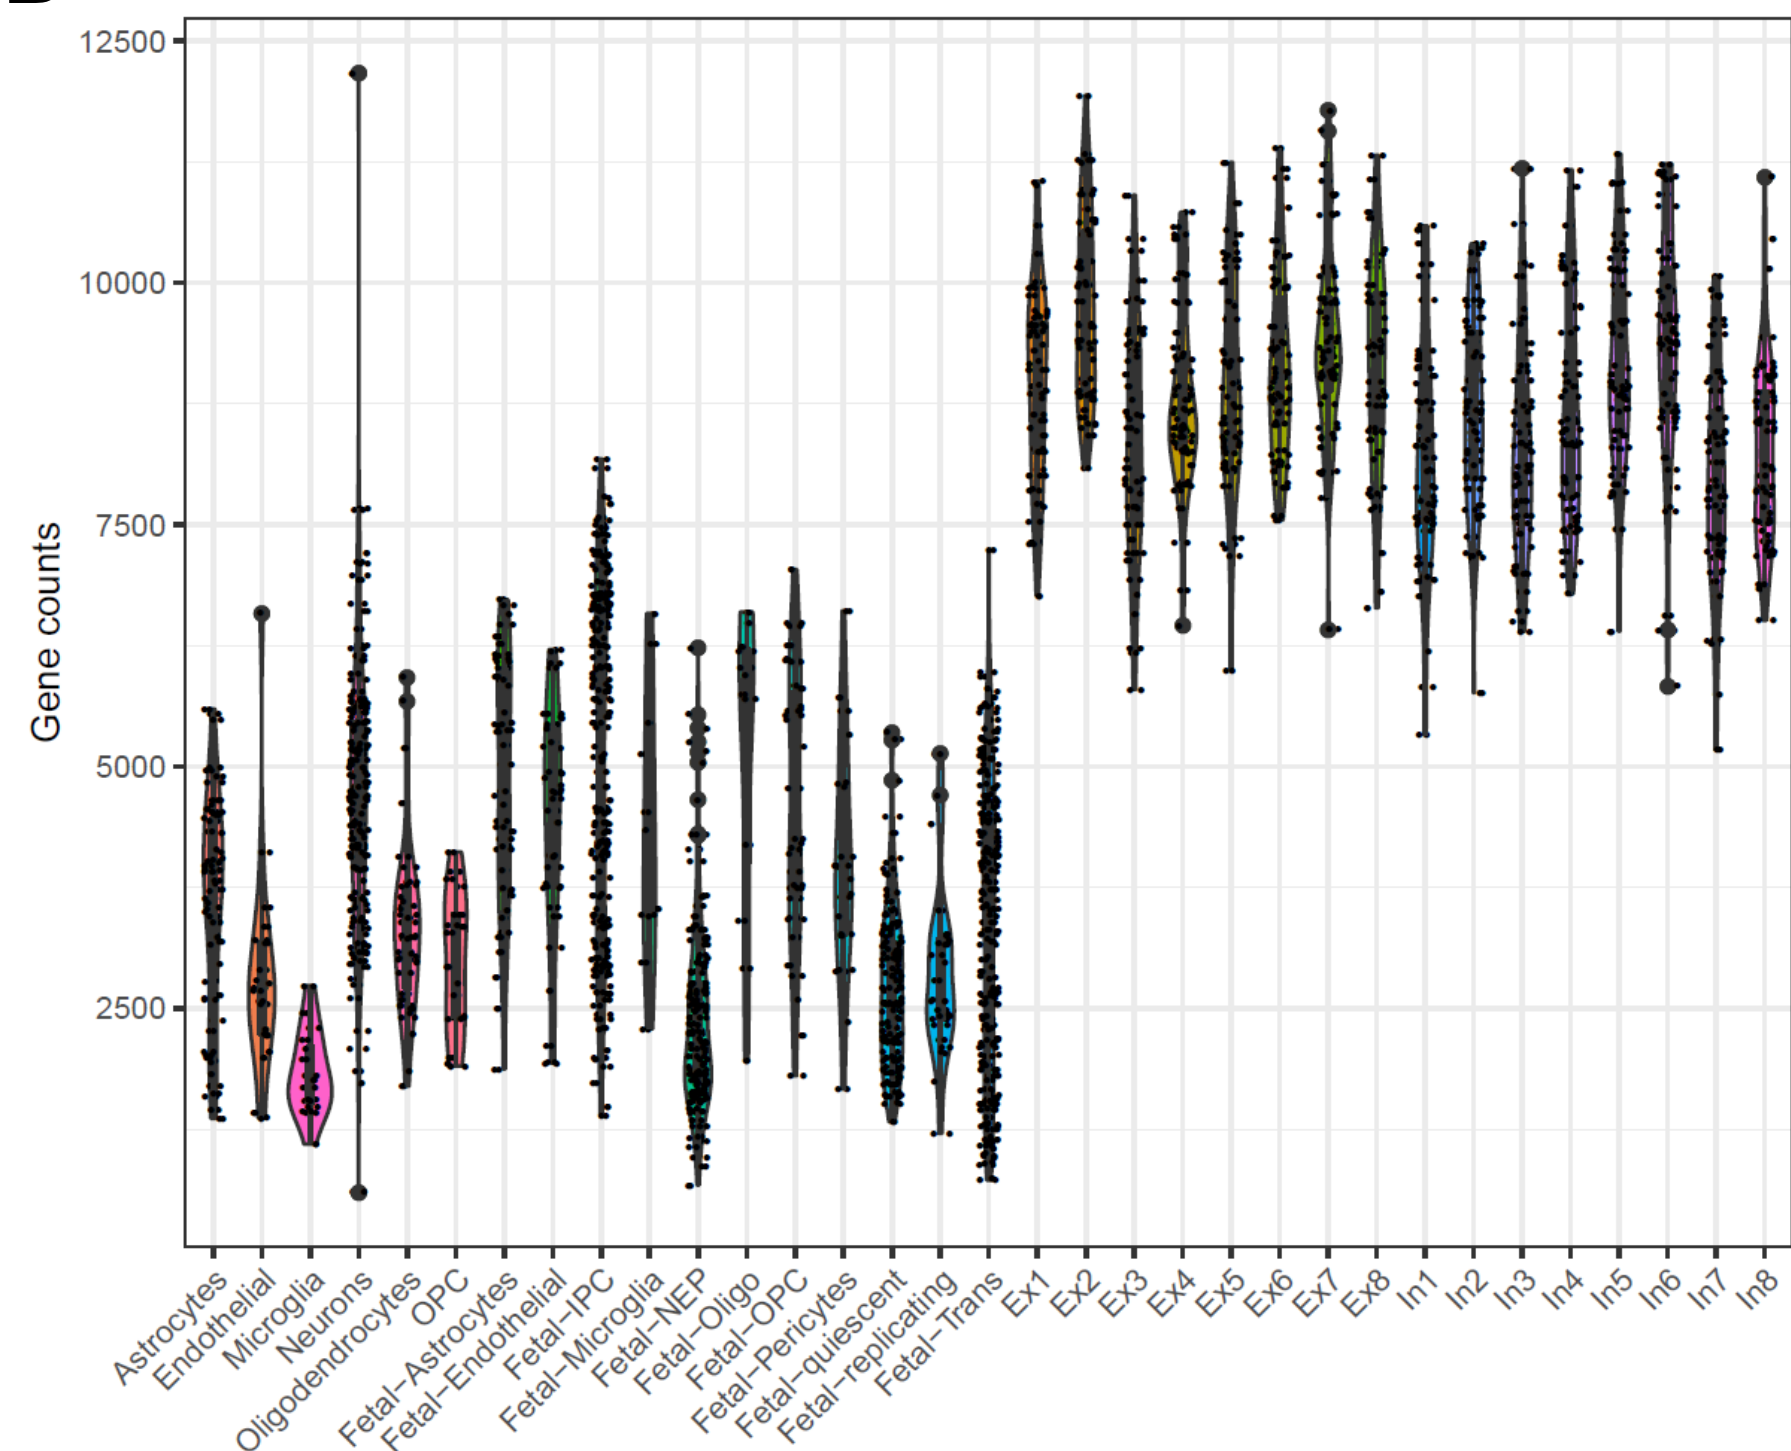

**Supplemental Fig. S9.** Overview of the human brain scRNA-Seq expression profiles data from PsychENCODE database. **A**, UMAP analysis of scRNA-Seq profiles from PsychENCODE database. **B**, Violin plots showed the median number of detected gene per cell across different cell types.
