# Supplementary material for: Gene expression imputation and cell-type deconvolution in human brain with spatiotemporal precision and its implications for brain-related disorders
Source: HighWire-hosted journal article supplement (doi:10.1101/gr.265769.120), 2020-12-03
Supplement: Supplemental_Table_S1.xlsx [file Supplemental_Table_S1.xlsx]

## Sheet: Table S1
Supplemental Table S1. Overview of the working BrainSpan samples included in this study.
ID	Sample_ID	Donor_name	Age	Sex	Imputation status	Temporal_stage	Spatial_region	Structure_name
1	H376.IIB.50_AMY	H376.IIB.50	12 pcw	F		Early prenatal	AMY	amygdaloid complex
2	H376.IIB.50_STC	H376.IIB.50	12 pcw	F		Early prenatal	STC	posterior (caudal) superior temporal cortex (area 22c)
3	H376.IIB.50_MFC	H376.IIB.50	12 pcw	F		Early prenatal	MFC	anterior (rostral) cingulate (medial prefrontal) cortex
4	H376.IIB.50_DFC	H376.IIB.50	12 pcw	F		Early prenatal	DFC	dorsolateral prefrontal cortex
5	H376.IIB.50_OFC	H376.IIB.50	12 pcw	F		Early prenatal	OFC	orbital frontal cortex
6	H376.IIB.50_ITC	H376.IIB.50	12 pcw	F		Early prenatal	ITC	inferolateral temporal cortex (area TEv, area 20)
7	H376.IIB.50_HIP	H376.IIB.50	12 pcw	F		Early prenatal	HIP	hippocampus (hippocampal formation)
8	H376.IIB.50_VFC	H376.IIB.50	12 pcw	F		Early prenatal	VFC	ventrolateral prefrontal cortex
9	H376.IIB.50_A1C	H376.IIB.50	12 pcw	F		Early prenatal	A1C	primary auditory cortex (core)
10	H376.IIB.50_V1C	H376.IIB.50	12 pcw	F		Early prenatal	V1C	primary visual cortex (striate cortex, area V1/17)
11	H376.IIB.50_STR	H376.IIB.50	12 pcw	F		Early prenatal	STR	striatum
12	H376.IIB.50_M1C	H376.IIB.50	12 pcw	F		Early prenatal	M1C	primary motor cortex (area M1, area 4)
13	H376.IIB.50_IPC	H376.IIB.50	12 pcw	F		Early prenatal	IPC	posteroventral (inferior) parietal cortex
14	H376.IIB.50_S1C	H376.IIB.50	12 pcw	F		Early prenatal	S1C	primary somatosensory cortex (area S1, areas 3,1,2)
15	H376.IIB.50_CBC	H376.IIB.50	12 pcw	F	Yes	Early prenatal	CBC	cerebellar cortex
16	H376.IIB.50_MD	H376.IIB.50	12 pcw	F	Yes	Early prenatal	MD	mediodorsal nucleus of thalamus
17	H376.IIB.51_AMY	H376.IIB.51	12 pcw	F		Early prenatal	AMY	amygdaloid complex
18	H376.IIB.51_STC	H376.IIB.51	12 pcw	F		Early prenatal	STC	posterior (caudal) superior temporal cortex (area 22c)
19	H376.IIB.51_MFC	H376.IIB.51	12 pcw	F	Yes	Early prenatal	MFC	anterior (rostral) cingulate (medial prefrontal) cortex
20	H376.IIB.51_DFC	H376.IIB.51	12 pcw	F		Early prenatal	DFC	dorsolateral prefrontal cortex
21	H376.IIB.51_OFC	H376.IIB.51	12 pcw	F		Early prenatal	OFC	orbital frontal cortex
22	H376.IIB.51_ITC	H376.IIB.51	12 pcw	F		Early prenatal	ITC	inferolateral temporal cortex (area TEv, area 20)
23	H376.IIB.51_HIP	H376.IIB.51	12 pcw	F		Early prenatal	HIP	hippocampus (hippocampal formation)
24	H376.IIB.51_VFC	H376.IIB.51	12 pcw	F		Early prenatal	VFC	ventrolateral prefrontal cortex
25	H376.IIB.51_A1C	H376.IIB.51	12 pcw	F		Early prenatal	A1C	primary auditory cortex (core)
26	H376.IIB.51_V1C	H376.IIB.51	12 pcw	F		Early prenatal	V1C	primary visual cortex (striate cortex, area V1/17)
27	H376.IIB.51_STR	H376.IIB.51	12 pcw	F		Early prenatal	STR	striatum
28	H376.IIB.51_M1C	H376.IIB.51	12 pcw	F		Early prenatal	M1C	primary motor cortex (area M1, area 4)
29	H376.IIB.51_IPC	H376.IIB.51	12 pcw	F		Early prenatal	IPC	posteroventral (inferior) parietal cortex
30	H376.IIB.51_S1C	H376.IIB.51	12 pcw	F		Early prenatal	S1C	primary somatosensory cortex (area S1, areas 3,1,2)
31	H376.IIB.51_CBC	H376.IIB.51	12 pcw	F	Yes	Early prenatal	CBC	cerebellar cortex
32	H376.IIB.51_MD	H376.IIB.51	12 pcw	F	Yes	Early prenatal	MD	mediodorsal nucleus of thalamus
33	H376.IIB.52_AMY	H376.IIB.52	12 pcw	F		Early prenatal	AMY	amygdaloid complex
34	H376.IIB.52_STC	H376.IIB.52	12 pcw	F	Yes	Early prenatal	STC	posterior (caudal) superior temporal cortex (area 22c)
35	H376.IIB.52_MFC	H376.IIB.52	12 pcw	F		Early prenatal	MFC	anterior (rostral) cingulate (medial prefrontal) cortex
36	H376.IIB.52_DFC	H376.IIB.52	12 pcw	F		Early prenatal	DFC	dorsolateral prefrontal cortex
37	H376.IIB.52_OFC	H376.IIB.52	12 pcw	F		Early prenatal	OFC	orbital frontal cortex
38	H376.IIB.52_ITC	H376.IIB.52	12 pcw	F		Early prenatal	ITC	inferolateral temporal cortex (area TEv, area 20)
39	H376.IIB.52_HIP	H376.IIB.52	12 pcw	F		Early prenatal	HIP	hippocampus (hippocampal formation)
40	H376.IIB.52_VFC	H376.IIB.52	12 pcw	F		Early prenatal	VFC	ventrolateral prefrontal cortex
41	H376.IIB.52_A1C	H376.IIB.52	12 pcw	F		Early prenatal	A1C	primary auditory cortex (core)
42	H376.IIB.52_V1C	H376.IIB.52	12 pcw	F		Early prenatal	V1C	primary visual cortex (striate cortex, area V1/17)
43	H376.IIB.52_STR	H376.IIB.52	12 pcw	F		Early prenatal	STR	striatum
44	H376.IIB.52_M1C	H376.IIB.52	12 pcw	F		Early prenatal	M1C	primary motor cortex (area M1, area 4)
45	H376.IIB.52_IPC	H376.IIB.52	12 pcw	F		Early prenatal	IPC	posteroventral (inferior) parietal cortex
46	H376.IIB.52_S1C	H376.IIB.52	12 pcw	F		Early prenatal	S1C	primary somatosensory cortex (area S1, areas 3,1,2)
47	H376.IIB.52_CBC	H376.IIB.52	12 pcw	F		Early prenatal	CBC	cerebellar cortex
48	H376.IIB.52_MD	H376.IIB.52	12 pcw	F	Yes	Early prenatal	MD	mediodorsal nucleus of thalamus
49	H376.IIIA.50_AMY	H376.IIIA.50	13 pcw	M		Intermediate prenatal	AMY	amygdaloid complex
50	H376.IIIA.50_STC	H376.IIIA.50	13 pcw	M		Intermediate prenatal	STC	posterior (caudal) superior temporal cortex (area 22c)
51	H376.IIIA.50_MFC	H376.IIIA.50	13 pcw	M		Intermediate prenatal	MFC	anterior (rostral) cingulate (medial prefrontal) cortex
52	H376.IIIA.50_DFC	H376.IIIA.50	13 pcw	M		Intermediate prenatal	DFC	dorsolateral prefrontal cortex
53	H376.IIIA.50_OFC	H376.IIIA.50	13 pcw	M		Intermediate prenatal	OFC	orbital frontal cortex
54	H376.IIIA.50_ITC	H376.IIIA.50	13 pcw	M		Intermediate prenatal	ITC	inferolateral temporal cortex (area TEv, area 20)
55	H376.IIIA.50_HIP	H376.IIIA.50	13 pcw	M		Intermediate prenatal	HIP	hippocampus (hippocampal formation)
56	H376.IIIA.50_VFC	H376.IIIA.50	13 pcw	M		Intermediate prenatal	VFC	ventrolateral prefrontal cortex
57	H376.IIIA.50_A1C	H376.IIIA.50	13 pcw	M		Intermediate prenatal	A1C	primary auditory cortex (core)
58	H376.IIIA.50_V1C	H376.IIIA.50	13 pcw	M		Intermediate prenatal	V1C	primary visual cortex (striate cortex, area V1/17)
59	H376.IIIA.50_STR	H376.IIIA.50	13 pcw	M		Intermediate prenatal	STR	striatum
60	H376.IIIA.50_M1C	H376.IIIA.50	13 pcw	M		Intermediate prenatal	M1C	primary motor cortex (area M1, area 4)
61	H376.IIIA.50_IPC	H376.IIIA.50	13 pcw	M		Intermediate prenatal	IPC	posteroventral (inferior) parietal cortex
62	H376.IIIA.50_S1C	H376.IIIA.50	13 pcw	M		Intermediate prenatal	S1C	primary somatosensory cortex (area S1, areas 3,1,2)
63	H376.IIIA.50_CBC	H376.IIIA.50	13 pcw	M	Yes	Intermediate prenatal	CBC	cerebellar cortex
64	H376.IIIA.50_MD	H376.IIIA.50	13 pcw	M	Yes	Intermediate prenatal	MD	mediodorsal nucleus of thalamus
65	H376.IIIA.51_AMY	H376.IIIA.51	13 pcw	F		Intermediate prenatal	AMY	amygdaloid complex
66	H376.IIIA.51_STC	H376.IIIA.51	13 pcw	F		Intermediate prenatal	STC	posterior (caudal) superior temporal cortex (area 22c)
67	H376.IIIA.51_MFC	H376.IIIA.51	13 pcw	F		Intermediate prenatal	MFC	anterior (rostral) cingulate (medial prefrontal) cortex
68	H376.IIIA.51_DFC	H376.IIIA.51	13 pcw	F		Intermediate prenatal	DFC	dorsolateral prefrontal cortex
69	H376.IIIA.51_OFC	H376.IIIA.51	13 pcw	F		Intermediate prenatal	OFC	orbital frontal cortex
70	H376.IIIA.51_ITC	H376.IIIA.51	13 pcw	F		Intermediate prenatal	ITC	inferolateral temporal cortex (area TEv, area 20)
71	H376.IIIA.51_HIP	H376.IIIA.51	13 pcw	F		Intermediate prenatal	HIP	hippocampus (hippocampal formation)
72	H376.IIIA.51_VFC	H376.IIIA.51	13 pcw	F		Intermediate prenatal	VFC	ventrolateral prefrontal cortex
73	H376.IIIA.51_A1C	H376.IIIA.51	13 pcw	F		Intermediate prenatal	A1C	primary auditory cortex (core)
74	H376.IIIA.51_V1C	H376.IIIA.51	13 pcw	F		Intermediate prenatal	V1C	primary visual cortex (striate cortex, area V1/17)
75	H376.IIIA.51_STR	H376.IIIA.51	13 pcw	F		Intermediate prenatal	STR	striatum
76	H376.IIIA.51_M1C	H376.IIIA.51	13 pcw	F		Intermediate prenatal	M1C	primary motor cortex (area M1, area 4)
77	H376.IIIA.51_IPC	H376.IIIA.51	13 pcw	F		Intermediate prenatal	IPC	posteroventral (inferior) parietal cortex
78	H376.IIIA.51_S1C	H376.IIIA.51	13 pcw	F		Intermediate prenatal	S1C	primary somatosensory cortex (area S1, areas 3,1,2)
79	H376.IIIA.51_CBC	H376.IIIA.51	13 pcw	F	Yes	Intermediate prenatal	CBC	cerebellar cortex
80	H376.IIIA.51_MD	H376.IIIA.51	13 pcw	F		Intermediate prenatal	MD	mediodorsal nucleus of thalamus
81	H376.IIIA.52_AMY	H376.IIIA.52	13 pcw	M		Intermediate prenatal	AMY	amygdaloid complex
82	H376.IIIA.52_STC	H376.IIIA.52	13 pcw	M	Yes	Intermediate prenatal	STC	posterior (caudal) superior temporal cortex (area 22c)
83	H376.IIIA.52_MFC	H376.IIIA.52	13 pcw	M		Intermediate prenatal	MFC	anterior (rostral) cingulate (medial prefrontal) cortex
84	H376.IIIA.52_DFC	H376.IIIA.52	13 pcw	M		Intermediate prenatal	DFC	dorsolateral prefrontal cortex
85	H376.IIIA.52_OFC	H376.IIIA.52	13 pcw	M		Intermediate prenatal	OFC	orbital frontal cortex
86	H376.IIIA.52_ITC	H376.IIIA.52	13 pcw	M		Intermediate prenatal	ITC	inferolateral temporal cortex (area TEv, area 20)
87	H376.IIIA.52_HIP	H376.IIIA.52	13 pcw	M		Intermediate prenatal	HIP	hippocampus (hippocampal formation)
88	H376.IIIA.52_VFC	H376.IIIA.52	13 pcw	M		Intermediate prenatal	VFC	ventrolateral prefrontal cortex
89	H376.IIIA.52_A1C	H376.IIIA.52	13 pcw	M		Intermediate prenatal	A1C	primary auditory cortex (core)
90	H376.IIIA.52_V1C	H376.IIIA.52	13 pcw	M		Intermediate prenatal	V1C	primary visual cortex (striate cortex, area V1/17)
91	H376.IIIA.52_STR	H376.IIIA.52	13 pcw	M		Intermediate prenatal	STR	striatum
92	H376.IIIA.52_M1C	H376.IIIA.52	13 pcw	M		Intermediate prenatal	M1C	primary motor cortex (area M1, area 4)
93	H376.IIIA.52_IPC	H376.IIIA.52	13 pcw	M		Intermediate prenatal	IPC	posteroventral (inferior) parietal cortex
94	H376.IIIA.52_S1C	H376.IIIA.52	13 pcw	M		Intermediate prenatal	S1C	primary somatosensory cortex (area S1, areas 3,1,2)
95	H376.IIIA.52_CBC	H376.IIIA.52	13 pcw	M	Yes	Intermediate prenatal	CBC	cerebellar cortex
96	H376.IIIA.52_MD	H376.IIIA.52	13 pcw	M	Yes	Intermediate prenatal	MD	mediodorsal nucleus of thalamus
97	H376.IIIB.50_AMY	H376.IIIB.50	13 pcw	M	Yes	Intermediate prenatal	AMY	amygdaloid complex
98	H376.IIIB.50_STC	H376.IIIB.50	16 pcw	M		Intermediate prenatal	STC	posterior (caudal) superior temporal cortex (area 22c)
99	H376.IIIB.50_MFC	H376.IIIB.50	16 pcw	M		Intermediate prenatal	MFC	anterior (rostral) cingulate (medial prefrontal) cortex
100	H376.IIIB.50_DFC	H376.IIIB.50	16 pcw	M		Intermediate prenatal	DFC	dorsolateral prefrontal cortex
101	H376.IIIB.50_OFC	H376.IIIB.50	16 pcw	M		Intermediate prenatal	OFC	orbital frontal cortex
102	H376.IIIB.50_ITC	H376.IIIB.50	16 pcw	M	Yes	Intermediate prenatal	ITC	inferolateral temporal cortex (area TEv, area 20)
103	H376.IIIB.50_HIP	H376.IIIB.50	16 pcw	M	Yes	Intermediate prenatal	HIP	hippocampus (hippocampal formation)
104	H376.IIIB.50_VFC	H376.IIIB.50	16 pcw	M		Intermediate prenatal	VFC	ventrolateral prefrontal cortex
105	H376.IIIB.50_A1C	H376.IIIB.50	16 pcw	M		Intermediate prenatal	A1C	primary auditory cortex (core)
106	H376.IIIB.50_V1C	H376.IIIB.50	16 pcw	M		Intermediate prenatal	V1C	primary visual cortex (striate cortex, area V1/17)
107	H376.IIIB.50_STR	H376.IIIB.50	16 pcw	M		Intermediate prenatal	STR	striatum
108	H376.IIIB.50_M1C	H376.IIIB.50	16 pcw	M	Yes	Intermediate prenatal	M1C	primary motor cortex (area M1, area 4)
109	H376.IIIB.50_IPC	H376.IIIB.50	16 pcw	M		Intermediate prenatal	IPC	posteroventral (inferior) parietal cortex
110	H376.IIIB.50_S1C	H376.IIIB.50	16 pcw	M	Yes	Intermediate prenatal	S1C	primary somatosensory cortex (area S1, areas 3,1,2)
111	H376.IIIB.50_CBC	H376.IIIB.50	16 pcw	M	Yes	Intermediate prenatal	CBC	cerebellar cortex
112	H376.IIIB.50_MD	H376.IIIB.50	16 pcw	M		Intermediate prenatal	MD	mediodorsal nucleus of thalamus
113	H376.IIIB.51_AMY	H376.IIIB.51	16 pcw	M		Intermediate prenatal	AMY	amygdaloid complex
114	H376.IIIB.51_STC	H376.IIIB.51	16 pcw	M		Intermediate prenatal	STC	posterior (caudal) superior temporal cortex (area 22c)
115	H376.IIIB.51_MFC	H376.IIIB.51	16 pcw	M		Intermediate prenatal	MFC	anterior (rostral) cingulate (medial prefrontal) cortex
116	H376.IIIB.51_DFC	H376.IIIB.51	16 pcw	M		Intermediate prenatal	DFC	dorsolateral prefrontal cortex
117	H376.IIIB.51_OFC	H376.IIIB.51	16 pcw	M		Intermediate prenatal	OFC	orbital frontal cortex
118	H376.IIIB.51_ITC	H376.IIIB.51	16 pcw	M		Intermediate prenatal	ITC	inferolateral temporal cortex (area TEv, area 20)
119	H376.IIIB.51_HIP	H376.IIIB.51	16 pcw	M		Intermediate prenatal	HIP	hippocampus (hippocampal formation)
120	H376.IIIB.51_VFC	H376.IIIB.51	16 pcw	M		Intermediate prenatal	VFC	ventrolateral prefrontal cortex
121	H376.IIIB.51_A1C	H376.IIIB.51	16 pcw	M		Intermediate prenatal	A1C	primary auditory cortex (core)
122	H376.IIIB.51_V1C	H376.IIIB.51	16 pcw	M		Intermediate prenatal	V1C	primary visual cortex (striate cortex, area V1/17)
123	H376.IIIB.51_STR	H376.IIIB.51	16 pcw	M		Intermediate prenatal	STR	striatum
124	H376.IIIB.51_M1C	H376.IIIB.51	16 pcw	M		Intermediate prenatal	M1C	primary motor cortex (area M1, area 4)
125	H376.IIIB.51_IPC	H376.IIIB.51	16 pcw	M		Intermediate prenatal	IPC	posteroventral (inferior) parietal cortex
126	H376.IIIB.51_S1C	H376.IIIB.51	16 pcw	M		Intermediate prenatal	S1C	primary somatosensory cortex (area S1, areas 3,1,2)
127	H376.IIIB.51_CBC	H376.IIIB.51	16 pcw	M		Intermediate prenatal	CBC	cerebellar cortex
128	H376.IIIB.51_MD	H376.IIIB.51	16 pcw	M		Intermediate prenatal	MD	mediodorsal nucleus of thalamus
129	H376.IIIB.52_AMY	H376.IIIB.52	16 pcw	M		Intermediate prenatal	AMY	amygdaloid complex
130	H376.IIIB.52_STC	H376.IIIB.52	16 pcw	M		Intermediate prenatal	STC	posterior (caudal) superior temporal cortex (area 22c)
131	H376.IIIB.52_MFC	H376.IIIB.52	16 pcw	M		Intermediate prenatal	MFC	anterior (rostral) cingulate (medial prefrontal) cortex
132	H376.IIIB.52_DFC	H376.IIIB.52	16 pcw	M		Intermediate prenatal	DFC	dorsolateral prefrontal cortex
133	H376.IIIB.52_OFC	H376.IIIB.52	16 pcw	M	Yes	Intermediate prenatal	OFC	orbital frontal cortex
134	H376.IIIB.52_ITC	H376.IIIB.52	16 pcw	M		Intermediate prenatal	ITC	inferolateral temporal cortex (area TEv, area 20)
135	H376.IIIB.52_HIP	H376.IIIB.52	16 pcw	M		Intermediate prenatal	HIP	hippocampus (hippocampal formation)
136	H376.IIIB.52_VFC	H376.IIIB.52	16 pcw	M		Intermediate prenatal	VFC	ventrolateral prefrontal cortex
137	H376.IIIB.52_A1C	H376.IIIB.52	16 pcw	M		Intermediate prenatal	A1C	primary auditory cortex (core)
138	H376.IIIB.52_V1C	H376.IIIB.52	16 pcw	M		Intermediate prenatal	V1C	primary visual cortex (striate cortex, area V1/17)
139	H376.IIIB.52_STR	H376.IIIB.52	16 pcw	M		Intermediate prenatal	STR	striatum
140	H376.IIIB.52_M1C	H376.IIIB.52	16 pcw	M		Intermediate prenatal	M1C	S1C
141	H376.IIIB.52_IPC	H376.IIIB.52	16 pcw	M		Intermediate prenatal	IPC	posteroventral (inferior) parietal cortex
142	H376.IIIB.52_S1C	H376.IIIB.52	16 pcw	M		Intermediate prenatal	S1C	S1C
143	H376.IIIB.52_CBC	H376.IIIB.52	16 pcw	M	Yes	Intermediate prenatal	CBC	cerebellar cortex
144	H376.IIIB.52_MD	H376.IIIB.52	16 pcw	M		Intermediate prenatal	MD	mediodorsal nucleus of thalamus
145	H376.IIIB.53_AMY	H376.IIIB.53	17 pcw	F		Intermediate prenatal	AMY	amygdaloid complex
146	H376.IIIB.53_STC	H376.IIIB.53	17 pcw	F		Intermediate prenatal	STC	posterior (caudal) superior temporal cortex (area 22c)
147	H376.IIIB.53_MFC	H376.IIIB.53	17 pcw	F		Intermediate prenatal	MFC	anterior (rostral) cingulate (medial prefrontal) cortex
148	H376.IIIB.53_DFC	H376.IIIB.53	17 pcw	F		Intermediate prenatal	DFC	dorsolateral prefrontal cortex
149	H376.IIIB.53_OFC	H376.IIIB.53	17 pcw	F		Intermediate prenatal	OFC	orbital frontal cortex
150	H376.IIIB.53_ITC	H376.IIIB.53	17 pcw	F	Yes	Intermediate prenatal	ITC	inferolateral temporal cortex (area TEv, area 20)
151	H376.IIIB.53_HIP	H376.IIIB.53	17 pcw	F		Intermediate prenatal	HIP	hippocampus (hippocampal formation)
152	H376.IIIB.53_VFC	H376.IIIB.53	17 pcw	F		Intermediate prenatal	VFC	ventrolateral prefrontal cortex
153	H376.IIIB.53_A1C	H376.IIIB.53	17 pcw	F		Intermediate prenatal	A1C	primary auditory cortex (core)
154	H376.IIIB.53_V1C	H376.IIIB.53	17 pcw	F		Intermediate prenatal	V1C	primary visual cortex (striate cortex, area V1/17)
155	H376.IIIB.53_STR	H376.IIIB.53	17 pcw	F		Intermediate prenatal	STR	striatum
156	H376.IIIB.53_M1C	H376.IIIB.53	17 pcw	F		Intermediate prenatal	M1C	S1C
157	H376.IIIB.53_IPC	H376.IIIB.53	17 pcw	F		Intermediate prenatal	IPC	posteroventral (inferior) parietal cortex
158	H376.IIIB.53_S1C	H376.IIIB.53	17 pcw	F		Intermediate prenatal	S1C	S1C
159	H376.IIIB.53_CBC	H376.IIIB.53	17 pcw	F		Intermediate prenatal	CBC	cerebellar cortex
160	H376.IIIB.53_MD	H376.IIIB.53	17 pcw	F		Intermediate prenatal	MD	mediodorsal nucleus of thalamus
161	H376.IV.53_AMY	H376.IV.53	19 pcw	F	Yes	Intermediate prenatal	AMY	amygdaloid complex
162	H376.IV.53_STC	H376.IV.53	19 pcw	F		Intermediate prenatal	STC	posterior (caudal) superior temporal cortex (area 22c)
163	H376.IV.53_MFC	H376.IV.53	19 pcw	F		Intermediate prenatal	MFC	anterior (rostral) cingulate (medial prefrontal) cortex
164	H376.IV.53_DFC	H376.IV.53	19 pcw	F		Intermediate prenatal	DFC	dorsolateral prefrontal cortex
165	H376.IV.53_OFC	H376.IV.53	19 pcw	F	Yes	Intermediate prenatal	OFC	orbital frontal cortex
166	H376.IV.53_ITC	H376.IV.53	19 pcw	F	Yes	Intermediate prenatal	ITC	inferolateral temporal cortex (area TEv, area 20)
167	H376.IV.53_HIP	H376.IV.53	19 pcw	F		Intermediate prenatal	HIP	hippocampus (hippocampal formation)
168	H376.IV.53_VFC	H376.IV.53	19 pcw	F		Intermediate prenatal	VFC	ventrolateral prefrontal cortex
169	H376.IV.53_A1C	H376.IV.53	19 pcw	F		Intermediate prenatal	A1C	primary auditory cortex (core)
170	H376.IV.53_V1C	H376.IV.53	19 pcw	F		Intermediate prenatal	V1C	primary visual cortex (striate cortex, area V1/17)
171	H376.IV.53_STR	H376.IV.53	19 pcw	F		Intermediate prenatal	STR	striatum
172	H376.IV.53_M1C	H376.IV.53	19 pcw	F		Intermediate prenatal	M1C	S1C
173	H376.IV.53_IPC	H376.IV.53	19 pcw	F		Intermediate prenatal	IPC	posteroventral (inferior) parietal cortex
174	H376.IV.53_S1C	H376.IV.53	19 pcw	F		Intermediate prenatal	S1C	S1C
175	H376.IV.53_CBC	H376.IV.53	19 pcw	F	Yes	Intermediate prenatal	CBC	cerebellar cortex
176	H376.IV.53_MD	H376.IV.53	19 pcw	F		Intermediate prenatal	MD	mediodorsal nucleus of thalamus
177	H376.IV.54_AMY	H376.IV.54	21 pcw	M		Intermediate prenatal	AMY	amygdaloid complex
178	H376.IV.54_STC	H376.IV.54	21 pcw	M		Intermediate prenatal	STC	posterior (caudal) superior temporal cortex (area 22c)
179	H376.IV.54_MFC	H376.IV.54	21 pcw	M		Intermediate prenatal	MFC	anterior (rostral) cingulate (medial prefrontal) cortex
180	H376.IV.54_DFC	H376.IV.54	21 pcw	M		Intermediate prenatal	DFC	dorsolateral prefrontal cortex
181	H376.IV.54_OFC	H376.IV.54	21 pcw	M		Intermediate prenatal	OFC	orbital frontal cortex
182	H376.IV.54_ITC	H376.IV.54	21 pcw	M		Intermediate prenatal	ITC	inferolateral temporal cortex (area TEv, area 20)
183	H376.IV.54_HIP	H376.IV.54	21 pcw	M		Intermediate prenatal	HIP	hippocampus (hippocampal formation)
184	H376.IV.54_VFC	H376.IV.54	21 pcw	M		Intermediate prenatal	VFC	ventrolateral prefrontal cortex
185	H376.IV.54_A1C	H376.IV.54	21 pcw	M	Yes	Intermediate prenatal	A1C	primary auditory cortex (core)
186	H376.IV.54_V1C	H376.IV.54	21 pcw	M		Intermediate prenatal	V1C	primary visual cortex (striate cortex, area V1/17)
187	H376.IV.54_STR	H376.IV.54	21 pcw	M		Intermediate prenatal	STR	striatum
188	H376.IV.54_M1C	H376.IV.54	21 pcw	M		Intermediate prenatal	M1C	primary motor cortex (area M1, area 4)
189	H376.IV.54_IPC	H376.IV.54	21 pcw	M		Intermediate prenatal	IPC	posteroventral (inferior) parietal cortex
190	H376.IV.54_S1C	H376.IV.54	21 pcw	M		Intermediate prenatal	S1C	primary somatosensory cortex (area S1, areas 3,1,2)
191	H376.IV.54_CBC	H376.IV.54	21 pcw	M		Intermediate prenatal	CBC	cerebellar cortex
192	H376.IV.54_MD	H376.IV.54	21 pcw	M	Yes	Intermediate prenatal	MD	mediodorsal nucleus of thalamus
193	H376.IV.50_AMY	H376.IV.50	24 pcw	M		Intermediate prenatal	AMY	amygdaloid complex
194	H376.IV.50_STC	H376.IV.50	24 pcw	M		Intermediate prenatal	STC	posterior (caudal) superior temporal cortex (area 22c)
195	H376.IV.50_MFC	H376.IV.50	24 pcw	M		Intermediate prenatal	MFC	anterior (rostral) cingulate (medial prefrontal) cortex
196	H376.IV.50_DFC	H376.IV.50	24 pcw	M		Intermediate prenatal	DFC	dorsolateral prefrontal cortex
197	H376.IV.50_OFC	H376.IV.50	24 pcw	M		Intermediate prenatal	OFC	orbital frontal cortex
198	H376.IV.50_ITC	H376.IV.50	24 pcw	M		Intermediate prenatal	ITC	inferolateral temporal cortex (area TEv, area 20)
199	H376.IV.50_HIP	H376.IV.50	24 pcw	M		Intermediate prenatal	HIP	hippocampus (hippocampal formation)
200	H376.IV.50_VFC	H376.IV.50	24 pcw	M		Intermediate prenatal	VFC	ventrolateral prefrontal cortex
201	H376.IV.50_A1C	H376.IV.50	24 pcw	M		Intermediate prenatal	A1C	primary auditory cortex (core)
202	H376.IV.50_V1C	H376.IV.50	24 pcw	M		Intermediate prenatal	V1C	primary visual cortex (striate cortex, area V1/17)
203	H376.IV.50_STR	H376.IV.50	24 pcw	M		Intermediate prenatal	STR	striatum
204	H376.IV.50_M1C	H376.IV.50	24 pcw	M		Intermediate prenatal	M1C	primary motor cortex (area M1, area 4)
205	H376.IV.50_IPC	H376.IV.50	24 pcw	M		Intermediate prenatal	IPC	posteroventral (inferior) parietal cortex
206	H376.IV.50_S1C	H376.IV.50	24 pcw	M		Intermediate prenatal	S1C	primary somatosensory cortex (area S1, areas 3,1,2)
207	H376.IV.50_CBC	H376.IV.50	24 pcw	M		Intermediate prenatal	CBC	cerebellar cortex
208	H376.IV.50_MD	H376.IV.50	24 pcw	M		Intermediate prenatal	MD	mediodorsal nucleus of thalamus
209	H376.V.53_AMY	H376.V.53	37 pcw	M		Late prenatal	AMY	amygdaloid complex
210	H376.V.53_STC	H376.V.53	37 pcw	M		Late prenatal	STC	posterior (caudal) superior temporal cortex (area 22c)
211	H376.V.53_MFC	H376.V.53	37 pcw	M		Late prenatal	MFC	anterior (rostral) cingulate (medial prefrontal) cortex
212	H376.V.53_DFC	H376.V.53	37 pcw	M		Late prenatal	DFC	dorsolateral prefrontal cortex
213	H376.V.53_OFC	H376.V.53	37 pcw	M		Late prenatal	OFC	orbital frontal cortex
214	H376.V.53_ITC	H376.V.53	37 pcw	M		Late prenatal	ITC	inferolateral temporal cortex (area TEv, area 20)
215	H376.V.53_HIP	H376.V.53	37 pcw	M		Late prenatal	HIP	hippocampus (hippocampal formation)
216	H376.V.53_VFC	H376.V.53	37 pcw	M		Late prenatal	VFC	ventrolateral prefrontal cortex
217	H376.V.53_A1C	H376.V.53	37 pcw	M		Late prenatal	A1C	primary auditory cortex (core)
218	H376.V.53_V1C	H376.V.53	37 pcw	M		Late prenatal	V1C	primary visual cortex (striate cortex, area V1/17)
219	H376.V.53_STR	H376.V.53	37 pcw	M		Late prenatal	STR	striatum
220	H376.V.53_M1C	H376.V.53	37 pcw	M		Late prenatal	M1C	primary motor cortex (area M1, area 4)
221	H376.V.53_IPC	H376.V.53	37 pcw	M		Late prenatal	IPC	posteroventral (inferior) parietal cortex
222	H376.V.53_S1C	H376.V.53	37 pcw	M		Late prenatal	S1C	primary somatosensory cortex (area S1, areas 3,1,2)
223	H376.V.53_CBC	H376.V.53	37 pcw	M		Late prenatal	CBC	cerebellar cortex
224	H376.V.53_MD	H376.V.53	37 pcw	M		Late prenatal	MD	mediodorsal nucleus of thalamus
225	H376.VI.50_AMY	H376.VI.50	4 mos	M		Early postnatal	AMY	amygdaloid complex
226	H376.VI.50_STC	H376.VI.50	4 mos	M		Early postnatal	STC	posterior (caudal) superior temporal cortex (area 22c)
227	H376.VI.50_MFC	H376.VI.50	4 mos	M		Early postnatal	MFC	anterior (rostral) cingulate (medial prefrontal) cortex
228	H376.VI.50_DFC	H376.VI.50	4 mos	M	Yes	Early postnatal	DFC	dorsolateral prefrontal cortex
229	H376.VI.50_OFC	H376.VI.50	4 mos	M	Yes	Early postnatal	OFC	orbital frontal cortex
230	H376.VI.50_ITC	H376.VI.50	4 mos	M		Early postnatal	ITC	inferolateral temporal cortex (area TEv, area 20)
231	H376.VI.50_HIP	H376.VI.50	4 mos	M		Early postnatal	HIP	hippocampus (hippocampal formation)
232	H376.VI.50_VFC	H376.VI.50	4 mos	M	Yes	Early postnatal	VFC	ventrolateral prefrontal cortex
233	H376.VI.50_A1C	H376.VI.50	4 mos	M	Yes	Early postnatal	A1C	primary auditory cortex (core)
234	H376.VI.50_V1C	H376.VI.50	4 mos	M		Early postnatal	V1C	primary visual cortex (striate cortex, area V1/17)
235	H376.VI.50_STR	H376.VI.50	4 mos	M		Early postnatal	STR	striatum
236	H376.VI.50_M1C	H376.VI.50	4 mos	M	Yes	Early postnatal	M1C	primary motor cortex (area M1, area 4)
237	H376.VI.50_IPC	H376.VI.50	4 mos	M	Yes	Early postnatal	IPC	posteroventral (inferior) parietal cortex
238	H376.VI.50_S1C	H376.VI.50	4 mos	M	Yes	Early postnatal	S1C	primary somatosensory cortex (area S1, areas 3,1,3)
239	H376.VI.50_CBC	H376.VI.50	4 mos	M		Early postnatal	CBC	cerebellar cortex
240	H376.VI.50_MD	H376.VI.50	4 mos	M		Early postnatal	MD	mediodorsal nucleus of thalamus
241	H376.VI.51_AMY	H376.VI.51	4 mos	M		Early postnatal	AMY	amygdaloid complex
242	H376.VI.51_STC	H376.VI.51	4 mos	M		Early postnatal	STC	posterior (caudal) superior temporal cortex (area 22c)
243	H376.VI.51_MFC	H376.VI.51	4 mos	M	Yes	Early postnatal	MFC	anterior (rostral) cingulate (medial prefrontal) cortex
244	H376.VI.51_DFC	H376.VI.51	4 mos	M		Early postnatal	DFC	dorsolateral prefrontal cortex
245	H376.VI.51_OFC	H376.VI.51	4 mos	M		Early postnatal	OFC	orbital frontal cortex
246	H376.VI.51_ITC	H376.VI.51	4 mos	M		Early postnatal	ITC	inferolateral temporal cortex (area TEv, area 20)
247	H376.VI.51_HIP	H376.VI.51	4 mos	M	Yes	Early postnatal	HIP	hippocampus (hippocampal formation)
248	H376.VI.51_VFC	H376.VI.51	4 mos	M		Early postnatal	VFC	ventrolateral prefrontal cortex
249	H376.VI.51_A1C	H376.VI.51	4 mos	M		Early postnatal	A1C	primary auditory cortex (core)
250	H376.VI.51_V1C	H376.VI.51	4 mos	M	Yes	Early postnatal	V1C	primary visual cortex (striate cortex, area V1/17)
251	H376.VI.51_STR	H376.VI.51	4 mos	M	Yes	Early postnatal	STR	striatum
252	H376.VI.51_M1C	H376.VI.51	4 mos	M		Early postnatal	M1C	primary motor cortex (area M1, area 4)
253	H376.VI.51_IPC	H376.VI.51	4 mos	M	Yes	Early postnatal	IPC	posteroventral (inferior) parietal cortex
254	H376.VI.51_S1C	H376.VI.51	4 mos	M	Yes	Early postnatal	S1C	primary somatosensory cortex (area S1, areas 3,1,4)
255	H376.VI.51_CBC	H376.VI.51	4 mos	M	Yes	Early postnatal	CBC	cerebellar cortex
256	H376.VI.51_MD	H376.VI.51	4 mos	M	Yes	Early postnatal	MD	mediodorsal nucleus of thalamus
257	H376.VI.52_AMY	H376.VI.52	4 mos	M		Early postnatal	AMY	amygdaloid complex
258	H376.VI.52_STC	H376.VI.52	4 mos	M		Early postnatal	STC	posterior (caudal) superior temporal cortex (area 22c)
259	H376.VI.52_MFC	H376.VI.52	4 mos	M		Early postnatal	MFC	anterior (rostral) cingulate (medial prefrontal) cortex
260	H376.VI.52_DFC	H376.VI.52	4 mos	M		Early postnatal	DFC	dorsolateral prefrontal cortex
261	H376.VI.52_OFC	H376.VI.52	4 mos	M		Early postnatal	OFC	orbital frontal cortex
262	H376.VI.52_ITC	H376.VI.52	4 mos	M		Early postnatal	ITC	inferolateral temporal cortex (area TEv, area 20)
263	H376.VI.52_HIP	H376.VI.52	4 mos	M		Early postnatal	HIP	hippocampus (hippocampal formation)
264	H376.VI.52_VFC	H376.VI.52	4 mos	M		Early postnatal	VFC	ventrolateral prefrontal cortex
265	H376.VI.52_A1C	H376.VI.52	4 mos	M		Early postnatal	A1C	primary auditory cortex (core)
266	H376.VI.52_V1C	H376.VI.52	4 mos	M		Early postnatal	V1C	primary visual cortex (striate cortex, area V1/17)
267	H376.VI.52_STR	H376.VI.52	4 mos	M		Early postnatal	STR	striatum
268	H376.VI.52_M1C	H376.VI.52	4 mos	M		Early postnatal	M1C	primary motor cortex (area M1, area 4)
269	H376.VI.52_IPC	H376.VI.52	4 mos	M		Early postnatal	IPC	posteroventral (inferior) parietal cortex
270	H376.VI.52_S1C	H376.VI.52	4 mos	M		Early postnatal	S1C	primary somatosensory cortex (area S1, areas 3,1,5)
271	H376.VI.52_CBC	H376.VI.52	4 mos	M		Early postnatal	CBC	cerebellar cortex
272	H376.VI.52_MD	H376.VI.52	4 mos	M		Early postnatal	MD	mediodorsal nucleus of thalamus
273	H376.VII.51_AMY	H376.VII.51	10 mos	M	Yes	Early postnatal	AMY	amygdaloid complex
274	H376.VII.51_STC	H376.VII.51	10 mos	M		Early postnatal	STC	posterior (caudal) superior temporal cortex (area 22c)
275	H376.VII.51_MFC	H376.VII.51	10 mos	M		Early postnatal	MFC	anterior (rostral) cingulate (medial prefrontal) cortex
276	H376.VII.51_DFC	H376.VII.51	10 mos	M		Early postnatal	DFC	dorsolateral prefrontal cortex
277	H376.VII.51_OFC	H376.VII.51	10 mos	M		Early postnatal	OFC	orbital frontal cortex
278	H376.VII.51_ITC	H376.VII.51	10 mos	M		Early postnatal	ITC	inferolateral temporal cortex (area TEv, area 20)
279	H376.VII.51_HIP	H376.VII.51	10 mos	M	Yes	Early postnatal	HIP	hippocampus (hippocampal formation)
280	H376.VII.51_VFC	H376.VII.51	10 mos	M	Yes	Early postnatal	VFC	ventrolateral prefrontal cortex
281	H376.VII.51_A1C	H376.VII.51	10 mos	M	Yes	Early postnatal	A1C	primary auditory cortex (core)
282	H376.VII.51_V1C	H376.VII.51	10 mos	M		Early postnatal	V1C	primary visual cortex (striate cortex, area V1/17)
283	H376.VII.51_STR	H376.VII.51	10 mos	M	Yes	Early postnatal	STR	striatum
284	H376.VII.51_M1C	H376.VII.51	10 mos	M	Yes	Early postnatal	M1C	primary motor cortex (area M1, area 4)
285	H376.VII.51_IPC	H376.VII.51	10 mos	M		Early postnatal	IPC	posteroventral (inferior) parietal cortex
286	H376.VII.51_S1C	H376.VII.51	10 mos	M		Early postnatal	S1C	primary somatosensory cortex (area S1, areas 3,1,6)
287	H376.VII.51_CBC	H376.VII.51	10 mos	M		Early postnatal	CBC	cerebellar cortex
288	H376.VII.51_MD	H376.VII.51	10 mos	M		Early postnatal	MD	mediodorsal nucleus of thalamus
289	H376.VIII.51_AMY	H376.VIII.51	1 yrs	F		Early postnatal	AMY	amygdaloid complex
290	H376.VIII.51_STC	H376.VIII.51	1 yrs	F		Early postnatal	STC	posterior (caudal) superior temporal cortex (area 22c)
291	H376.VIII.51_MFC	H376.VIII.51	1 yrs	F		Early postnatal	MFC	anterior (rostral) cingulate (medial prefrontal) cortex
292	H376.VIII.51_DFC	H376.VIII.51	1 yrs	F		Early postnatal	DFC	dorsolateral prefrontal cortex
293	H376.VIII.51_OFC	H376.VIII.51	1 yrs	F		Early postnatal	OFC	orbital frontal cortex
294	H376.VIII.51_ITC	H376.VIII.51	1 yrs	F		Early postnatal	ITC	inferolateral temporal cortex (area TEv, area 20)
295	H376.VIII.51_HIP	H376.VIII.51	1 yrs	F		Early postnatal	HIP	hippocampus (hippocampal formation)
296	H376.VIII.51_VFC	H376.VIII.51	1 yrs	F		Early postnatal	VFC	ventrolateral prefrontal cortex
297	H376.VIII.51_A1C	H376.VIII.51	1 yrs	F		Early postnatal	A1C	primary auditory cortex (core)
298	H376.VIII.51_V1C	H376.VIII.51	1 yrs	F		Early postnatal	V1C	primary visual cortex (striate cortex, area V1/17)
299	H376.VIII.51_STR	H376.VIII.51	1 yrs	F		Early postnatal	STR	striatum
300	H376.VIII.51_M1C	H376.VIII.51	1 yrs	F		Early postnatal	M1C	primary motor cortex (area M1, area 4)
301	H376.VIII.51_IPC	H376.VIII.51	1 yrs	F		Early postnatal	IPC	posteroventral (inferior) parietal cortex
302	H376.VIII.51_S1C	H376.VIII.51	1 yrs	F		Early postnatal	S1C	primary somatosensory cortex (area S1, areas 3,1,7)
303	H376.VIII.51_CBC	H376.VIII.51	1 yrs	F		Early postnatal	CBC	cerebellar cortex
304	H376.VIII.51_MD	H376.VIII.51	1 yrs	F		Early postnatal	MD	mediodorsal nucleus of thalamus
305	H376.VIII.53_AMY	H376.VIII.53	2 yrs	F	Yes	Early postnatal	AMY	amygdaloid complex
306	H376.VIII.53_STC	H376.VIII.53	2 yrs	F		Early postnatal	STC	posterior (caudal) superior temporal cortex (area 22c)
307	H376.VIII.53_MFC	H376.VIII.53	2 yrs	F		Early postnatal	MFC	anterior (rostral) cingulate (medial prefrontal) cortex
308	H376.VIII.53_DFC	H376.VIII.53	2 yrs	F		Early postnatal	DFC	dorsolateral prefrontal cortex
309	H376.VIII.53_OFC	H376.VIII.53	2 yrs	F		Early postnatal	OFC	orbital frontal cortex
310	H376.VIII.53_ITC	H376.VIII.53	2 yrs	F		Early postnatal	ITC	inferolateral temporal cortex (area TEv, area 20)
311	H376.VIII.53_HIP	H376.VIII.53	2 yrs	F		Early postnatal	HIP	hippocampus (hippocampal formation)
312	H376.VIII.53_VFC	H376.VIII.53	2 yrs	F		Early postnatal	VFC	ventrolateral prefrontal cortex
313	H376.VIII.53_A1C	H376.VIII.53	2 yrs	F	Yes	Early postnatal	A1C	primary auditory cortex (core)
314	H376.VIII.53_V1C	H376.VIII.53	2 yrs	F		Early postnatal	V1C	primary visual cortex (striate cortex, area V1/17)
315	H376.VIII.53_STR	H376.VIII.53	2 yrs	F	Yes	Early postnatal	STR	striatum
316	H376.VIII.53_M1C	H376.VIII.53	2 yrs	F	Yes	Early postnatal	M1C	primary motor cortex (area M1, area 4)
317	H376.VIII.53_IPC	H376.VIII.53	2 yrs	F		Early postnatal	IPC	posteroventral (inferior) parietal cortex
318	H376.VIII.53_S1C	H376.VIII.53	2 yrs	F		Early postnatal	S1C	primary somatosensory cortex (area S1, areas 3,1,8)
319	H376.VIII.53_CBC	H376.VIII.53	2 yrs	F		Early postnatal	CBC	cerebellar cortex
320	H376.VIII.53_MD	H376.VIII.53	2 yrs	F		Early postnatal	MD	mediodorsal nucleus of thalamus
321	H376.VIII.52_AMY	H376.VIII.52	3 yrs	F		Early postnatal	AMY	amygdaloid complex
322	H376.VIII.52_STC	H376.VIII.52	3 yrs	F		Early postnatal	STC	posterior (caudal) superior temporal cortex (area 22c)
323	H376.VIII.52_MFC	H376.VIII.52	3 yrs	F	Yes	Early postnatal	MFC	anterior (rostral) cingulate (medial prefrontal) cortex
324	H376.VIII.52_DFC	H376.VIII.52	3 yrs	F	Yes	Early postnatal	DFC	dorsolateral prefrontal cortex
325	H376.VIII.52_OFC	H376.VIII.52	3 yrs	F	Yes	Early postnatal	OFC	orbital frontal cortex
326	H376.VIII.52_ITC	H376.VIII.52	3 yrs	F		Early postnatal	ITC	inferolateral temporal cortex (area TEv, area 20)
327	H376.VIII.52_HIP	H376.VIII.52	3 yrs	F	Yes	Early postnatal	HIP	hippocampus (hippocampal formation)
328	H376.VIII.52_VFC	H376.VIII.52	3 yrs	F		Early postnatal	VFC	ventrolateral prefrontal cortex
329	H376.VIII.52_A1C	H376.VIII.52	3 yrs	F		Early postnatal	A1C	primary auditory cortex (core)
330	H376.VIII.52_V1C	H376.VIII.52	3 yrs	F		Early postnatal	V1C	primary visual cortex (striate cortex, area V1/17)
331	H376.VIII.52_STR	H376.VIII.52	3 yrs	F		Early postnatal	STR	striatum
332	H376.VIII.52_M1C	H376.VIII.52	3 yrs	F		Early postnatal	M1C	primary motor cortex (area M1, area 4)
333	H376.VIII.52_IPC	H376.VIII.52	3 yrs	F		Early postnatal	IPC	posteroventral (inferior) parietal cortex
334	H376.VIII.52_S1C	H376.VIII.52	3 yrs	F	Yes	Early postnatal	S1C	primary somatosensory cortex (area S1, areas 3,1,9)
335	H376.VIII.52_CBC	H376.VIII.52	3 yrs	F		Early postnatal	CBC	cerebellar cortex
336	H376.VIII.52_MD	H376.VIII.52	3 yrs	F		Early postnatal	MD	mediodorsal nucleus of thalamus
337	H376.VIII.54_AMY	H376.VIII.54	3 yrs	M		Early postnatal	AMY	amygdaloid complex
338	H376.VIII.54_STC	H376.VIII.54	3 yrs	M		Early postnatal	STC	posterior (caudal) superior temporal cortex (area 22c)
339	H376.VIII.54_MFC	H376.VIII.54	3 yrs	M		Early postnatal	MFC	anterior (rostral) cingulate (medial prefrontal) cortex
340	H376.VIII.54_DFC	H376.VIII.54	3 yrs	M		Early postnatal	DFC	dorsolateral prefrontal cortex
341	H376.VIII.54_OFC	H376.VIII.54	3 yrs	M		Early postnatal	OFC	orbital frontal cortex
342	H376.VIII.54_ITC	H376.VIII.54	3 yrs	M		Early postnatal	ITC	inferolateral temporal cortex (area TEv, area 20)
343	H376.VIII.54_HIP	H376.VIII.54	3 yrs	M		Early postnatal	HIP	hippocampus (hippocampal formation)
344	H376.VIII.54_VFC	H376.VIII.54	3 yrs	M		Early postnatal	VFC	ventrolateral prefrontal cortex
345	H376.VIII.54_A1C	H376.VIII.54	3 yrs	M		Early postnatal	A1C	primary auditory cortex (core)
346	H376.VIII.54_V1C	H376.VIII.54	3 yrs	M		Early postnatal	V1C	primary visual cortex (striate cortex, area V1/17)
347	H376.VIII.54_STR	H376.VIII.54	3 yrs	M	Yes	Early postnatal	STR	striatum
348	H376.VIII.54_M1C	H376.VIII.54	3 yrs	M		Early postnatal	M1C	primary motor cortex (area M1, area 4)
349	H376.VIII.54_IPC	H376.VIII.54	3 yrs	M		Early postnatal	IPC	posteroventral (inferior) parietal cortex
350	H376.VIII.54_S1C	H376.VIII.54	3 yrs	M		Early postnatal	S1C	primary somatosensory cortex (area S1, areas 3,1,10)
351	H376.VIII.54_CBC	H376.VIII.54	3 yrs	M		Early postnatal	CBC	cerebellar cortex
352	H376.VIII.54_MD	H376.VIII.54	3 yrs	M	Yes	Early postnatal	MD	mediodorsal nucleus of thalamus
353	H376.VIII.50_AMY	H376.VIII.50	4 yrs	M		Early postnatal	AMY	amygdaloid complex
354	H376.VIII.50_STC	H376.VIII.50	4 yrs	M		Early postnatal	STC	posterior (caudal) superior temporal cortex (area 22c)
355	H376.VIII.50_MFC	H376.VIII.50	4 yrs	M	Yes	Early postnatal	MFC	anterior (rostral) cingulate (medial prefrontal) cortex
356	H376.VIII.50_DFC	H376.VIII.50	4 yrs	M		Early postnatal	DFC	dorsolateral prefrontal cortex
357	H376.VIII.50_OFC	H376.VIII.50	4 yrs	M	Yes	Early postnatal	OFC	orbital frontal cortex
358	H376.VIII.50_ITC	H376.VIII.50	4 yrs	M	Yes	Early postnatal	ITC	inferolateral temporal cortex (area TEv, area 20)
359	H376.VIII.50_HIP	H376.VIII.50	4 yrs	M	Yes	Early postnatal	HIP	hippocampus (hippocampal formation)
360	H376.VIII.50_VFC	H376.VIII.50	4 yrs	M		Early postnatal	VFC	ventrolateral prefrontal cortex
361	H376.VIII.50_A1C	H376.VIII.50	4 yrs	M	Yes	Early postnatal	A1C	primary auditory cortex (core)
362	H376.VIII.50_V1C	H376.VIII.50	4 yrs	M	Yes	Early postnatal	V1C	primary visual cortex (striate cortex, area V1/17)
363	H376.VIII.50_STR	H376.VIII.50	4 yrs	M		Early postnatal	STR	striatum
364	H376.VIII.50_M1C	H376.VIII.50	4 yrs	M	Yes	Early postnatal	M1C	primary motor cortex (area M1, area 4)
365	H376.VIII.50_IPC	H376.VIII.50	4 yrs	M	Yes	Early postnatal	IPC	posteroventral (inferior) parietal cortex
366	H376.VIII.50_S1C	H376.VIII.50	4 yrs	M	Yes	Early postnatal	S1C	primary somatosensory cortex (area S1, areas 3,1,11)
367	H376.VIII.50_CBC	H376.VIII.50	4 yrs	M		Early postnatal	CBC	cerebellar cortex
368	H376.VIII.50_MD	H376.VIII.50	4 yrs	M		Early postnatal	MD	mediodorsal nucleus of thalamus
369	H376.IX.51_AMY	H376.IX.51	8 yrs	M		Intermediate postnatal	AMY	amygdaloid complex
370	H376.IX.51_STC	H376.IX.51	8 yrs	M		Intermediate postnatal	STC	posterior (caudal) superior temporal cortex (area 22c)
371	H376.IX.51_MFC	H376.IX.51	8 yrs	M		Intermediate postnatal	MFC	anterior (rostral) cingulate (medial prefrontal) cortex
372	H376.IX.51_DFC	H376.IX.51	8 yrs	M		Intermediate postnatal	DFC	dorsolateral prefrontal cortex
373	H376.IX.51_OFC	H376.IX.51	8 yrs	M		Intermediate postnatal	OFC	orbital frontal cortex
374	H376.IX.51_ITC	H376.IX.51	8 yrs	M		Intermediate postnatal	ITC	inferolateral temporal cortex (area TEv, area 20)
375	H376.IX.51_HIP	H376.IX.51	8 yrs	M		Intermediate postnatal	HIP	hippocampus (hippocampal formation)
376	H376.IX.51_VFC	H376.IX.51	8 yrs	M		Intermediate postnatal	VFC	ventrolateral prefrontal cortex
377	H376.IX.51_A1C	H376.IX.51	8 yrs	M		Intermediate postnatal	A1C	primary auditory cortex (core)
378	H376.IX.51_V1C	H376.IX.51	8 yrs	M		Intermediate postnatal	V1C	primary visual cortex (striate cortex, area V1/17)
379	H376.IX.51_STR	H376.IX.51	8 yrs	M		Intermediate postnatal	STR	striatum
380	H376.IX.51_M1C	H376.IX.51	8 yrs	M		Intermediate postnatal	M1C	primary motor cortex (area M1, area 4)
381	H376.IX.51_IPC	H376.IX.51	8 yrs	M		Intermediate postnatal	IPC	posteroventral (inferior) parietal cortex
382	H376.IX.51_S1C	H376.IX.51	8 yrs	M		Intermediate postnatal	S1C	primary somatosensory cortex (area S1, areas 3,1,12)
383	H376.IX.51_CBC	H376.IX.51	8 yrs	M		Intermediate postnatal	CBC	cerebellar cortex
384	H376.IX.51_MD	H376.IX.51	8 yrs	M		Intermediate postnatal	MD	mediodorsal nucleus of thalamus
385	H376.IX.52_AMY	H376.IX.52	8 yrs	M		Intermediate postnatal	AMY	amygdaloid complex
386	H376.IX.52_STC	H376.IX.52	8 yrs	M		Intermediate postnatal	STC	posterior (caudal) superior temporal cortex (area 22c)
387	H376.IX.52_MFC	H376.IX.52	8 yrs	M		Intermediate postnatal	MFC	anterior (rostral) cingulate (medial prefrontal) cortex
388	H376.IX.52_DFC	H376.IX.52	8 yrs	M		Intermediate postnatal	DFC	dorsolateral prefrontal cortex
389	H376.IX.52_OFC	H376.IX.52	8 yrs	M	Yes	Intermediate postnatal	OFC	orbital frontal cortex
390	H376.IX.52_ITC	H376.IX.52	8 yrs	M		Intermediate postnatal	ITC	inferolateral temporal cortex (area TEv, area 20)
391	H376.IX.52_HIP	H376.IX.52	8 yrs	M		Intermediate postnatal	HIP	hippocampus (hippocampal formation)
392	H376.IX.52_VFC	H376.IX.52	8 yrs	M		Intermediate postnatal	VFC	ventrolateral prefrontal cortex
393	H376.IX.52_A1C	H376.IX.52	8 yrs	M		Intermediate postnatal	A1C	primary auditory cortex (core)
394	H376.IX.52_V1C	H376.IX.52	8 yrs	M		Intermediate postnatal	V1C	primary visual cortex (striate cortex, area V1/17)
395	H376.IX.52_STR	H376.IX.52	8 yrs	M	Yes	Intermediate postnatal	STR	striatum
396	H376.IX.52_M1C	H376.IX.52	8 yrs	M	Yes	Intermediate postnatal	M1C	primary motor cortex (area M1, area 4)
397	H376.IX.52_IPC	H376.IX.52	8 yrs	M		Intermediate postnatal	IPC	posteroventral (inferior) parietal cortex
398	H376.IX.52_S1C	H376.IX.52	8 yrs	M	Yes	Intermediate postnatal	S1C	primary somatosensory cortex (area S1, areas 3,1,13)
399	H376.IX.52_CBC	H376.IX.52	8 yrs	M		Intermediate postnatal	CBC	cerebellar cortex
400	H376.IX.52_MD	H376.IX.52	8 yrs	M	Yes	Intermediate postnatal	MD	mediodorsal nucleus of thalamus
401	H376.IX.50_AMY	H376.IX.50	11 yrs	F		Intermediate postnatal	AMY	amygdaloid complex
402	H376.IX.50_STC	H376.IX.50	11 yrs	F		Intermediate postnatal	STC	posterior (caudal) superior temporal cortex (area 22c)
403	H376.IX.50_MFC	H376.IX.50	11 yrs	F		Intermediate postnatal	MFC	anterior (rostral) cingulate (medial prefrontal) cortex
404	H376.IX.50_DFC	H376.IX.50	11 yrs	F		Intermediate postnatal	DFC	dorsolateral prefrontal cortex
405	H376.IX.50_OFC	H376.IX.50	11 yrs	F		Intermediate postnatal	OFC	orbital frontal cortex
406	H376.IX.50_ITC	H376.IX.50	11 yrs	F		Intermediate postnatal	ITC	inferolateral temporal cortex (area TEv, area 20)
407	H376.IX.50_HIP	H376.IX.50	11 yrs	F		Intermediate postnatal	HIP	hippocampus (hippocampal formation)
408	H376.IX.50_VFC	H376.IX.50	11 yrs	F		Intermediate postnatal	VFC	ventrolateral prefrontal cortex
409	H376.IX.50_A1C	H376.IX.50	11 yrs	F		Intermediate postnatal	A1C	primary auditory cortex (core)
410	H376.IX.50_V1C	H376.IX.50	11 yrs	F		Intermediate postnatal	V1C	primary visual cortex (striate cortex, area V1/17)
411	H376.IX.50_STR	H376.IX.50	11 yrs	F	Yes	Intermediate postnatal	STR	striatum
412	H376.IX.50_M1C	H376.IX.50	11 yrs	F		Intermediate postnatal	M1C	primary motor cortex (area M1, area 4)
413	H376.IX.50_IPC	H376.IX.50	11 yrs	F		Intermediate postnatal	IPC	posteroventral (inferior) parietal cortex
414	H376.IX.50_S1C	H376.IX.50	11 yrs	F		Intermediate postnatal	S1C	primary somatosensory cortex (area S1, areas 3,1,14)
415	H376.IX.50_CBC	H376.IX.50	11 yrs	F		Intermediate postnatal	CBC	cerebellar cortex
416	H376.IX.50_MD	H376.IX.50	11 yrs	F	Yes	Intermediate postnatal	MD	mediodorsal nucleus of thalamus
417	H376.X.51_AMY	H376.X.51	13 yrs	F		Intermediate postnatal	AMY	amygdaloid complex
418	H376.X.51_STC	H376.X.51	13 yrs	F		Intermediate postnatal	STC	posterior (caudal) superior temporal cortex (area 22c)
419	H376.X.51_MFC	H376.X.51	13 yrs	F		Intermediate postnatal	MFC	anterior (rostral) cingulate (medial prefrontal) cortex
420	H376.X.51_DFC	H376.X.51	13 yrs	F		Intermediate postnatal	DFC	dorsolateral prefrontal cortex
421	H376.X.51_OFC	H376.X.51	13 yrs	F		Intermediate postnatal	OFC	orbital frontal cortex
422	H376.X.51_ITC	H376.X.51	13 yrs	F		Intermediate postnatal	ITC	inferolateral temporal cortex (area TEv, area 20)
423	H376.X.51_HIP	H376.X.51	13 yrs	F		Intermediate postnatal	HIP	hippocampus (hippocampal formation)
424	H376.X.51_VFC	H376.X.51	13 yrs	F		Intermediate postnatal	VFC	ventrolateral prefrontal cortex
425	H376.X.51_A1C	H376.X.51	13 yrs	F		Intermediate postnatal	A1C	primary auditory cortex (core)
426	H376.X.51_V1C	H376.X.51	13 yrs	F		Intermediate postnatal	V1C	primary visual cortex (striate cortex, area V1/17)
427	H376.X.51_STR	H376.X.51	13 yrs	F		Intermediate postnatal	STR	striatum
428	H376.X.51_M1C	H376.X.51	13 yrs	F		Intermediate postnatal	M1C	primary motor cortex (area M1, area 4)
429	H376.X.51_IPC	H376.X.51	13 yrs	F		Intermediate postnatal	IPC	posteroventral (inferior) parietal cortex
430	H376.X.51_S1C	H376.X.51	13 yrs	F		Intermediate postnatal	S1C	primary somatosensory cortex (area S1, areas 3,1,15)
431	H376.X.51_CBC	H376.X.51	13 yrs	F		Intermediate postnatal	CBC	cerebellar cortex
432	H376.X.51_MD	H376.X.51	13 yrs	F		Intermediate postnatal	MD	mediodorsal nucleus of thalamus
433	H376.X.53_AMY	H376.X.53	18 yrs	M	Yes	Late postnatal	AMY	amygdaloid complex
434	H376.X.53_STC	H376.X.53	18 yrs	M		Late postnatal	STC	posterior (caudal) superior temporal cortex (area 22c)
435	H376.X.53_MFC	H376.X.53	18 yrs	M		Late postnatal	MFC	anterior (rostral) cingulate (medial prefrontal) cortex
436	H376.X.53_DFC	H376.X.53	18 yrs	M		Late postnatal	DFC	dorsolateral prefrontal cortex
437	H376.X.53_OFC	H376.X.53	18 yrs	M		Late postnatal	OFC	orbital frontal cortex
438	H376.X.53_ITC	H376.X.53	18 yrs	M		Late postnatal	ITC	inferolateral temporal cortex (area TEv, area 20)
439	H376.X.53_HIP	H376.X.53	18 yrs	M		Late postnatal	HIP	hippocampus (hippocampal formation)
440	H376.X.53_VFC	H376.X.53	18 yrs	M		Late postnatal	VFC	ventrolateral prefrontal cortex
441	H376.X.53_A1C	H376.X.53	18 yrs	M		Late postnatal	A1C	primary auditory cortex (core)
442	H376.X.53_V1C	H376.X.53	18 yrs	M		Late postnatal	V1C	primary visual cortex (striate cortex, area V1/17)
443	H376.X.53_STR	H376.X.53	18 yrs	M	Yes	Late postnatal	STR	striatum
444	H376.X.53_M1C	H376.X.53	18 yrs	M		Late postnatal	M1C	primary motor cortex (area M1, area 4)
445	H376.X.53_IPC	H376.X.53	18 yrs	M		Late postnatal	IPC	posteroventral (inferior) parietal cortex
446	H376.X.53_S1C	H376.X.53	18 yrs	M		Late postnatal	S1C	primary somatosensory cortex (area S1, areas 3,1,16)
447	H376.X.53_CBC	H376.X.53	18 yrs	M		Late postnatal	CBC	cerebellar cortex
448	H376.X.53_MD	H376.X.53	18 yrs	M	Yes	Late postnatal	MD	mediodorsal nucleus of thalamus
449	H376.X.52_AMY	H376.X.52	19 yrs	F		Late postnatal	AMY	amygdaloid complex
450	H376.X.52_STC	H376.X.52	19 yrs	F		Late postnatal	STC	posterior (caudal) superior temporal cortex (area 22c)
451	H376.X.52_MFC	H376.X.52	19 yrs	F		Late postnatal	MFC	anterior (rostral) cingulate (medial prefrontal) cortex
452	H376.X.52_DFC	H376.X.52	19 yrs	F		Late postnatal	DFC	dorsolateral prefrontal cortex
453	H376.X.52_OFC	H376.X.52	19 yrs	F		Late postnatal	OFC	orbital frontal cortex
454	H376.X.52_ITC	H376.X.52	19 yrs	F		Late postnatal	ITC	inferolateral temporal cortex (area TEv, area 20)
455	H376.X.52_HIP	H376.X.52	19 yrs	F		Late postnatal	HIP	hippocampus (hippocampal formation)
456	H376.X.52_VFC	H376.X.52	19 yrs	F		Late postnatal	VFC	ventrolateral prefrontal cortex
457	H376.X.52_A1C	H376.X.52	19 yrs	F		Late postnatal	A1C	primary auditory cortex (core)
458	H376.X.52_V1C	H376.X.52	19 yrs	F		Late postnatal	V1C	primary visual cortex (striate cortex, area V1/17)
459	H376.X.52_STR	H376.X.52	19 yrs	F		Late postnatal	STR	striatum
460	H376.X.52_M1C	H376.X.52	19 yrs	F		Late postnatal	M1C	primary motor cortex (area M1, area 4)
461	H376.X.52_IPC	H376.X.52	19 yrs	F		Late postnatal	IPC	posteroventral (inferior) parietal cortex
462	H376.X.52_S1C	H376.X.52	19 yrs	F		Late postnatal	S1C	primary somatosensory cortex (area S1, areas 3,1,17)
463	H376.X.52_CBC	H376.X.52	19 yrs	F		Late postnatal	CBC	cerebellar cortex
464	H376.X.52_MD	H376.X.52	19 yrs	F		Late postnatal	MD	mediodorsal nucleus of thalamus
465	H376.XI.60_AMY	H376.XI.60	21 yrs	F		Late postnatal	AMY	amygdaloid complex
466	H376.XI.60_STC	H376.XI.60	21 yrs	F		Late postnatal	STC	posterior (caudal) superior temporal cortex (area 22c)
467	H376.XI.60_MFC	H376.XI.60	21 yrs	F		Late postnatal	MFC	anterior (rostral) cingulate (medial prefrontal) cortex
468	H376.XI.60_DFC	H376.XI.60	21 yrs	F		Late postnatal	DFC	dorsolateral prefrontal cortex
469	H376.XI.60_OFC	H376.XI.60	21 yrs	F		Late postnatal	OFC	orbital frontal cortex
470	H376.XI.60_ITC	H376.XI.60	21 yrs	F		Late postnatal	ITC	inferolateral temporal cortex (area TEv, area 20)
471	H376.XI.60_HIP	H376.XI.60	21 yrs	F		Late postnatal	HIP	hippocampus (hippocampal formation)
472	H376.XI.60_VFC	H376.XI.60	21 yrs	F		Late postnatal	VFC	ventrolateral prefrontal cortex
473	H376.XI.60_A1C	H376.XI.60	21 yrs	F		Late postnatal	A1C	primary auditory cortex (core)
474	H376.XI.60_V1C	H376.XI.60	21 yrs	F		Late postnatal	V1C	primary visual cortex (striate cortex, area V1/17)
475	H376.XI.60_STR	H376.XI.60	21 yrs	F		Late postnatal	STR	striatum
476	H376.XI.60_M1C	H376.XI.60	21 yrs	F		Late postnatal	M1C	primary motor cortex (area M1, area 4)
477	H376.XI.60_IPC	H376.XI.60	21 yrs	F		Late postnatal	IPC	posteroventral (inferior) parietal cortex
478	H376.XI.60_S1C	H376.XI.60	21 yrs	F		Late postnatal	S1C	primary somatosensory cortex (area S1, areas 3,1,18)
479	H376.XI.60_CBC	H376.XI.60	21 yrs	F		Late postnatal	CBC	cerebellar cortex
480	H376.XI.60_MD	H376.XI.60	21 yrs	F		Late postnatal	MD	mediodorsal nucleus of thalamus
481	H376.XI.50_AMY	H376.XI.50	23 yrs	M		Late postnatal	AMY	amygdaloid complex
482	H376.XI.50_STC	H376.XI.50	23 yrs	M		Late postnatal	STC	posterior (caudal) superior temporal cortex (area 22c)
483	H376.XI.50_MFC	H376.XI.50	23 yrs	M		Late postnatal	MFC	anterior (rostral) cingulate (medial prefrontal) cortex
484	H376.XI.50_DFC	H376.XI.50	23 yrs	M	Yes	Late postnatal	DFC	dorsolateral prefrontal cortex
485	H376.XI.50_OFC	H376.XI.50	23 yrs	M		Late postnatal	OFC	orbital frontal cortex
486	H376.XI.50_ITC	H376.XI.50	23 yrs	M		Late postnatal	ITC	inferolateral temporal cortex (area TEv, area 20)
487	H376.XI.50_HIP	H376.XI.50	23 yrs	M		Late postnatal	HIP	hippocampus (hippocampal formation)
488	H376.XI.50_VFC	H376.XI.50	23 yrs	M		Late postnatal	VFC	ventrolateral prefrontal cortex
489	H376.XI.50_A1C	H376.XI.50	23 yrs	M		Late postnatal	A1C	primary auditory cortex (core)
490	H376.XI.50_V1C	H376.XI.50	23 yrs	M	Yes	Late postnatal	V1C	primary visual cortex (striate cortex, area V1/17)
491	H376.XI.50_STR	H376.XI.50	23 yrs	M		Late postnatal	STR	striatum
492	H376.XI.50_M1C	H376.XI.50	23 yrs	M		Late postnatal	M1C	primary motor cortex (area M1, area 4)
493	H376.XI.50_IPC	H376.XI.50	23 yrs	M		Late postnatal	IPC	posteroventral (inferior) parietal cortex
494	H376.XI.50_S1C	H376.XI.50	23 yrs	M		Late postnatal	S1C	primary somatosensory cortex (area S1, areas 3,1,19)
495	H376.XI.50_CBC	H376.XI.50	23 yrs	M		Late postnatal	CBC	cerebellar cortex
496	H376.XI.50_MD	H376.XI.50	23 yrs	M		Late postnatal	MD	mediodorsal nucleus of thalamus
497	H376.XI.52_AMY	H376.XI.52	30 yrs	F		Late postnatal	AMY	amygdaloid complex
498	H376.XI.52_STC	H376.XI.52	30 yrs	F		Late postnatal	STC	posterior (caudal) superior temporal cortex (area 22c)
499	H376.XI.52_MFC	H376.XI.52	30 yrs	F		Late postnatal	MFC	anterior (rostral) cingulate (medial prefrontal) cortex
500	H376.XI.52_DFC	H376.XI.52	30 yrs	F		Late postnatal	DFC	dorsolateral prefrontal cortex
501	H376.XI.52_OFC	H376.XI.52	30 yrs	F		Late postnatal	OFC	orbital frontal cortex
502	H376.XI.52_ITC	H376.XI.52	30 yrs	F		Late postnatal	ITC	inferolateral temporal cortex (area TEv, area 20)
503	H376.XI.52_HIP	H376.XI.52	30 yrs	F		Late postnatal	HIP	hippocampus (hippocampal formation)
504	H376.XI.52_VFC	H376.XI.52	30 yrs	F		Late postnatal	VFC	ventrolateral prefrontal cortex
505	H376.XI.52_A1C	H376.XI.52	30 yrs	F		Late postnatal	A1C	primary auditory cortex (core)
506	H376.XI.52_V1C	H376.XI.52	30 yrs	F		Late postnatal	V1C	primary visual cortex (striate cortex, area V1/17)
507	H376.XI.52_STR	H376.XI.52	30 yrs	F		Late postnatal	STR	striatum
508	H376.XI.52_M1C	H376.XI.52	30 yrs	F		Late postnatal	M1C	primary motor cortex (area M1, area 4)
509	H376.XI.52_IPC	H376.XI.52	30 yrs	F		Late postnatal	IPC	posteroventral (inferior) parietal cortex
510	H376.XI.52_S1C	H376.XI.52	30 yrs	F		Late postnatal	S1C	primary somatosensory cortex (area S1, areas 3,1,20)
511	H376.XI.52_CBC	H376.XI.52	30 yrs	F		Late postnatal	CBC	cerebellar cortex
512	H376.XI.52_MD	H376.XI.52	30 yrs	F		Late postnatal	MD	mediodorsal nucleus of thalamus
513	H376.XI.53_AMY	H376.XI.53	36 yrs	M		Late postnatal	AMY	amygdaloid complex
514	H376.XI.53_STC	H376.XI.53	36 yrs	M		Late postnatal	STC	posterior (caudal) superior temporal cortex (area 22c)
515	H376.XI.53_MFC	H376.XI.53	36 yrs	M		Late postnatal	MFC	anterior (rostral) cingulate (medial prefrontal) cortex
516	H376.XI.53_DFC	H376.XI.53	36 yrs	M		Late postnatal	DFC	dorsolateral prefrontal cortex
517	H376.XI.53_OFC	H376.XI.53	36 yrs	M		Late postnatal	OFC	orbital frontal cortex
518	H376.XI.53_ITC	H376.XI.53	36 yrs	M		Late postnatal	ITC	inferolateral temporal cortex (area TEv, area 20)
519	H376.XI.53_HIP	H376.XI.53	36 yrs	M		Late postnatal	HIP	hippocampus (hippocampal formation)
520	H376.XI.53_VFC	H376.XI.53	36 yrs	M		Late postnatal	VFC	ventrolateral prefrontal cortex
521	H376.XI.53_A1C	H376.XI.53	36 yrs	M		Late postnatal	A1C	primary auditory cortex (core)
522	H376.XI.53_V1C	H376.XI.53	36 yrs	M		Late postnatal	V1C	primary visual cortex (striate cortex, area V1/17)
523	H376.XI.53_STR	H376.XI.53	36 yrs	M		Late postnatal	STR	striatum
524	H376.XI.53_M1C	H376.XI.53	36 yrs	M		Late postnatal	M1C	primary motor cortex (area M1, area 4)
525	H376.XI.53_IPC	H376.XI.53	36 yrs	M		Late postnatal	IPC	posteroventral (inferior) parietal cortex
526	H376.XI.53_S1C	H376.XI.53	36 yrs	M		Late postnatal	S1C	primary somatosensory cortex (area S1, areas 3,1,21)
527	H376.XI.53_CBC	H376.XI.53	36 yrs	M		Late postnatal	CBC	cerebellar cortex
528	H376.XI.53_MD	H376.XI.53	36 yrs	M		Late postnatal	MD	mediodorsal nucleus of thalamus
529	H376.XI.54_AMY	H376.XI.54	37 yrs	M		Late postnatal	AMY	amygdaloid complex
530	H376.XI.54_STC	H376.XI.54	37 yrs	M		Late postnatal	STC	posterior (caudal) superior temporal cortex (area 22c)
531	H376.XI.54_MFC	H376.XI.54	37 yrs	M		Late postnatal	MFC	anterior (rostral) cingulate (medial prefrontal) cortex
532	H376.XI.54_DFC	H376.XI.54	37 yrs	M		Late postnatal	DFC	dorsolateral prefrontal cortex
533	H376.XI.54_OFC	H376.XI.54	37 yrs	M		Late postnatal	OFC	orbital frontal cortex
534	H376.XI.54_ITC	H376.XI.54	37 yrs	M		Late postnatal	ITC	inferolateral temporal cortex (area TEv, area 20)
535	H376.XI.54_HIP	H376.XI.54	37 yrs	M		Late postnatal	HIP	hippocampus (hippocampal formation)
536	H376.XI.54_VFC	H376.XI.54	37 yrs	M		Late postnatal	VFC	ventrolateral prefrontal cortex
537	H376.XI.54_A1C	H376.XI.54	37 yrs	M		Late postnatal	A1C	primary auditory cortex (core)
538	H376.XI.54_V1C	H376.XI.54	37 yrs	M		Late postnatal	V1C	primary visual cortex (striate cortex, area V1/17)
539	H376.XI.54_STR	H376.XI.54	37 yrs	M		Late postnatal	STR	striatum
540	H376.XI.54_M1C	H376.XI.54	37 yrs	M		Late postnatal	M1C	primary motor cortex (area M1, area 4)
541	H376.XI.54_IPC	H376.XI.54	37 yrs	M		Late postnatal	IPC	posteroventral (inferior) parietal cortex
542	H376.XI.54_S1C	H376.XI.54	37 yrs	M		Late postnatal	S1C	primary somatosensory cortex (area S1, areas 3,1,2)
543	H376.XI.54_CBC	H376.XI.54	37 yrs	M		Late postnatal	CBC	cerebellar cortex
544	H376.XI.54_MD	H376.XI.54	37 yrs	M		Late postnatal	MD	mediodorsal nucleus of thalamus
545	H376.XI.56_AMY	H376.XI.56	40 yrs	F		Late postnatal	AMY	amygdaloid complex
546	H376.XI.56_STC	H376.XI.56	40 yrs	F		Late postnatal	STC	posterior (caudal) superior temporal cortex (area 22c)
547	H376.XI.56_MFC	H376.XI.56	40 yrs	F	Yes	Late postnatal	MFC	anterior (rostral) cingulate (medial prefrontal) cortex
548	H376.XI.56_DFC	H376.XI.56	40 yrs	F		Late postnatal	DFC	dorsolateral prefrontal cortex
549	H376.XI.56_OFC	H376.XI.56	40 yrs	F		Late postnatal	OFC	orbital frontal cortex
550	H376.XI.56_ITC	H376.XI.56	40 yrs	F		Late postnatal	ITC	inferolateral temporal cortex (area TEv, area 20)
551	H376.XI.56_HIP	H376.XI.56	40 yrs	F		Late postnatal	HIP	hippocampus (hippocampal formation)
552	H376.XI.56_VFC	H376.XI.56	40 yrs	F		Late postnatal	VFC	ventrolateral prefrontal cortex
553	H376.XI.56_A1C	H376.XI.56	40 yrs	F		Late postnatal	A1C	primary auditory cortex (core)
554	H376.XI.56_V1C	H376.XI.56	40 yrs	F		Late postnatal	V1C	primary visual cortex (striate cortex, area V1/17)
555	H376.XI.56_STR	H376.XI.56	40 yrs	F		Late postnatal	STR	striatum
556	H376.XI.56_M1C	H376.XI.56	40 yrs	F		Late postnatal	M1C	primary motor cortex (area M1, area 4)
557	H376.XI.56_IPC	H376.XI.56	40 yrs	F		Late postnatal	IPC	posteroventral (inferior) parietal cortex
558	H376.XI.56_S1C	H376.XI.56	40 yrs	F		Late postnatal	S1C	primary somatosensory cortex (area S1, areas 3,1,2)
559	H376.XI.56_CBC	H376.XI.56	40 yrs	F		Late postnatal	CBC	cerebellar cortex
560	H376.XI.56_MD	H376.XI.56	40 yrs	F		Late postnatal	MD	mediodorsal nucleus of thalamus
