# Supplementary material for: Gene expression imputation and cell-type deconvolution in human brain with spatiotemporal precision and its implications for brain-related disorders
Source: HighWire-hosted journal article supplement (doi:10.1101/gr.265769.120), 2020-12-03
Supplement: Supplemental_Table_S2.xlsx [file Supplemental_Table_S2.xlsx]

## Sheet: Table S2_1
Supplemental Table S2. Gene Ontology (GO) and Kyoto Encyclopedia of Genes and Genomes (KEGG) pathway enrichment analysis for 29 modules identified by weighted gene co-expression network analysis (WGCNA).
Module	Category	GO Term and KEGG pathway	Count	P_value	FDR
black	GOTERM_CC_ALL	GO:0005739~mitochondrion	141	2.63254e-44	3.88806e-41
black	GOTERM_CC_ALL	GO:0044429~mitochondrial part	108	9.50299e-44	1.40352e-40
black	GOTERM_CC_ALL	GO:0005740~mitochondrial envelope	89	3.02303e-39	4.46478e-36
black	GOTERM_CC_ALL	GO:0005743~mitochondrial inner membrane	75	4.20768e-39	6.21443e-36
black	GOTERM_CC_ALL	GO:0031966~mitochondrial membrane	84	6.481e-37	9.57195e-34
black	GOTERM_CC_ALL	GO:0019866~organelle inner membrane	76	1.09888e-36	1.62296e-33
black	GOTERM_CC_ALL	GO:0044455~mitochondrial membrane part	45	1.29942e-30	1.91915e-27
black	GOTERM_CC_ALL	GO:0031967~organelle envelope	98	1.59374e-30	2.35383e-27
black	GOTERM_CC_ALL	GO:0031975~envelope	98	2.25212e-30	3.32621e-27
black	GOTERM_CC_ALL	GO:0098800~inner mitochondrial membrane protein complex	38	4.79506e-30	7.08195e-27
black	GOTERM_CC_ALL	GO:0098798~mitochondrial protein complex	40	2.38367e-28	3.5205e-25
black	KEGG_PATHWAY	hsa00190:Oxidative phosphorylation	36	8.17313e-28	1.00102e-24
black	GOTERM_BP_ALL	GO:0007005~mitochondrion organization	70	2.62033e-27	4.86074e-24
black	KEGG_PATHWAY	hsa05012:Parkinson's disease	36	9.56748e-27	1.1718e-23
black	GOTERM_BP_ALL	GO:0009141~nucleoside triphosphate metabolic process	48	3.15473e-26	5.85207e-23
black	GOTERM_BP_ALL	GO:0009144~purine nucleoside triphosphate metabolic process	46	7.73623e-26	1.43508e-22
black	GOTERM_CC_ALL	GO:0070469~respiratory chain	30	6.34241e-25	9.36726e-22
black	GOTERM_BP_ALL	GO:0022904~respiratory electron transport chain	31	1.9951e-24	3.70092e-21
black	GOTERM_BP_ALL	GO:0009205~purine ribonucleoside triphosphate metabolic process	44	2.25966e-24	4.1917e-21
black	GOTERM_BP_ALL	GO:0042775~mitochondrial ATP synthesis coupled electron transport	29	2.29137e-24	4.25051e-21
black	GOTERM_BP_ALL	GO:0042773~ATP synthesis coupled electron transport	29	3.22382e-24	5.98023e-21
black	KEGG_PATHWAY	hsa05016:Huntington's disease	38	3.52371e-24	4.31575e-21
black	GOTERM_BP_ALL	GO:0022900~electron transport chain	31	3.60187e-24	6.68151e-21
black	GOTERM_BP_ALL	GO:0009199~ribonucleoside triphosphate metabolic process	44	5.63637e-24	1.04555e-20
black	GOTERM_CC_ALL	GO:0005746~mitochondrial respiratory chain	28	1.72495e-23	2.54762e-20
black	GOTERM_BP_ALL	GO:0006119~oxidative phosphorylation	30	2.58795e-23	4.80067e-20
black	GOTERM_BP_ALL	GO:0046034~ATP metabolic process	41	4.25271e-23	7.88883e-20
black	GOTERM_CC_ALL	GO:0098803~respiratory chain complex	27	4.4278e-23	6.53952e-20
black	GOTERM_BP_ALL	GO:0009167~purine ribonucleoside monophosphate metabolic process	43	2.73578e-22	5.0749e-19
black	GOTERM_BP_ALL	GO:0045333~cellular respiration	35	2.87e-22	5.32388e-19
black	GOTERM_BP_ALL	GO:0009126~purine nucleoside monophosphate metabolic process	43	3.14045e-22	5.82557e-19
black	GOTERM_BP_ALL	GO:0046128~purine ribonucleoside metabolic process	47	6.59681e-22	1.22372e-18
black	KEGG_PATHWAY	hsa05010:Alzheimer's disease	34	7.47714e-22	9.15779e-19
black	GOTERM_BP_ALL	GO:0042278~purine nucleoside metabolic process	47	9.36542e-22	1.7373e-18
black	GOTERM_BP_ALL	GO:0009161~ribonucleoside monophosphate metabolic process	43	1.37787e-21	2.55596e-18
black	GOTERM_CC_ALL	GO:1990204~oxidoreductase complex	28	6.99717e-21	1.03343e-17
black	GOTERM_BP_ALL	GO:0009123~nucleoside monophosphate metabolic process	43	8.21753e-21	1.52436e-17
black	GOTERM_BP_ALL	GO:0006091~generation of precursor metabolites and energy	47	8.84239e-21	1.64027e-17
black	GOTERM_CC_ALL	GO:0005737~cytoplasm	334	1.07584e-20	1.58894e-17
black	GOTERM_BP_ALL	GO:0009119~ribonucleoside metabolic process	47	1.68418e-20	3.12416e-17
black	KEGG_PATHWAY	hsa04932:Non-alcoholic fatty liver disease (NAFLD)	31	4.73688e-20	5.80159e-17
black	GOTERM_BP_ALL	GO:0009116~nucleoside metabolic process	48	4.75306e-20	8.81698e-17
black	GOTERM_BP_ALL	GO:1901657~glycosyl compound metabolic process	49	6.75207e-20	1.25252e-16
black	GOTERM_BP_ALL	GO:0015980~energy derivation by oxidation of organic compounds	39	1.70926e-19	3.17069e-16
black	GOTERM_BP_ALL	GO:0006163~purine nucleotide metabolic process	53	1.26489e-18	2.34639e-15
black	GOTERM_BP_ALL	GO:0006753~nucleoside phosphate metabolic process	59	1.30091e-18	2.4132e-15
black	GOTERM_CC_ALL	GO:0044444~cytoplasmic part	272	2.07837e-18	3.0696e-15
black	GOTERM_BP_ALL	GO:0009150~purine ribonucleotide metabolic process	51	3.83115e-18	7.10683e-15
black	GOTERM_BP_ALL	GO:0055086~nucleobase-containing small molecule metabolic process	60	1.00146e-17	1.85771e-14
black	GOTERM_BP_ALL	GO:0072521~purine-containing compound metabolic process	53	1.08029e-17	2.00394e-14
black	GOTERM_BP_ALL	GO:0009259~ribonucleotide metabolic process	51	1.24943e-17	2.3177e-14
black	GOTERM_CC_ALL	GO:0031090~organelle membrane	128	1.39286e-17	2.05715e-14
black	GOTERM_BP_ALL	GO:0009117~nucleotide metabolic process	57	1.54383e-17	2.86383e-14
black	GOTERM_BP_ALL	GO:1901564~organonitrogen compound metabolic process	114	1.5683e-17	2.90922e-14
black	GOTERM_BP_ALL	GO:0055114~oxidation-reduction process	70	2.43638e-17	4.51952e-14
black	GOTERM_BP_ALL	GO:0019693~ribose phosphate metabolic process	51	3.62051e-17	6.71609e-14
black	GOTERM_BP_ALL	GO:0006120~mitochondrial electron transport, NADH to ubiquinone	19	5.61173e-17	2.10942e-13
black	GOTERM_CC_ALL	GO:0005759~mitochondrial matrix	44	1.69372e-16	3.33067e-13
black	GOTERM_CC_ALL	GO:0005747~mitochondrial respiratory chain complex I	18	2.75617e-16	3.33067e-13
black	GOTERM_CC_ALL	GO:0045271~respiratory chain complex I	18	2.75617e-16	3.33067e-13
black	GOTERM_CC_ALL	GO:0030964~NADH dehydrogenase complex	18	2.75617e-16	3.33067e-13
black	GOTERM_BP_ALL	GO:0044281~small molecule metabolic process	100	5.7716e-15	1.07137e-11
black	GOTERM_MF_ALL	GO:0016491~oxidoreductase activity	57	9.32306e-15	1.43663e-11
black	GOTERM_CC_ALL	GO:0044446~intracellular organelle part	265	1.71829e-14	2.5413e-11
black	GOTERM_CC_ALL	GO:0044422~organelle part	269	1.84683e-14	2.72227e-11
black	GOTERM_MF_ALL	GO:0016655~oxidoreductase activity, acting on NAD(P)H, quinone or similar compound as acceptor	18	3.08519e-14	4.75509e-11
black	GOTERM_CC_ALL	GO:0043227~membrane-bounded organelle	346	5.83357e-14	8.60867e-11
black	GOTERM_CC_ALL	GO:0044424~intracellular part	375	9.31344e-14	1.37568e-10
black	GOTERM_MF_ALL	GO:0003954~NADH dehydrogenase activity	16	1.19173e-13	1.83542e-10
black	GOTERM_MF_ALL	GO:0050136~NADH dehydrogenase (quinone) activity	16	1.19173e-13	1.83542e-10
black	GOTERM_MF_ALL	GO:0008137~NADH dehydrogenase (ubiquinone) activity	16	1.19173e-13	1.83542e-10
black	GOTERM_BP_ALL	GO:0033108~mitochondrial respiratory chain complex assembly	20	1.33678e-13	2.47957e-10
black	KEGG_PATHWAY	hsa01100:Metabolic pathways	70	1.45426e-13	1.78135e-10
black	GOTERM_BP_ALL	GO:0019637~organophosphate metabolic process	68	1.5078e-13	2.79676e-10
black	GOTERM_CC_ALL	GO:0043231~intracellular membrane-bounded organelle	321	3.52278e-13	5.20284e-10
black	GOTERM_MF_ALL	GO:0016651~oxidoreductase activity, acting on NAD(P)H	21	4.40084e-13	6.78058e-10
black	GOTERM_BP_ALL	GO:0032981~mitochondrial respiratory chain complex I assembly	17	5.42195e-13	1.00585e-09
black	GOTERM_BP_ALL	GO:0097031~mitochondrial respiratory chain complex I biogenesis	17	5.42195e-13	1.00585e-09
black	GOTERM_BP_ALL	GO:0010257~NADH dehydrogenase complex assembly	17	5.42195e-13	1.00585e-09
black	GOTERM_CC_ALL	GO:1902494~catalytic complex	64	6.75669e-12	9.97914e-09
black	GOTERM_CC_ALL	GO:0043226~organelle	358	8.2784e-12	1.22265e-08
black	GOTERM_BP_ALL	GO:1901135~carbohydrate derivative metabolic process	69	1.15857e-11	2.14917e-08
black	GOTERM_CC_ALL	GO:0005622~intracellular	376	1.66879e-11	2.46467e-08
black	GOTERM_CC_ALL	GO:0043229~intracellular organelle	337	2.02857e-11	2.99604e-08
black	GOTERM_BP_ALL	GO:0070125~mitochondrial translational elongation	17	7.37201e-11	1.36751e-07
black	GOTERM_CC_ALL	GO:0045259~proton-transporting ATP synthase complex	11	8.11199e-11	1.19808e-07
black	GOTERM_BP_ALL	GO:1902600~hydrogen ion transmembrane transport	19	8.75855e-11	1.62472e-07
black	GOTERM_BP_ALL	GO:0070126~mitochondrial translational termination	17	8.87084e-11	1.64555e-07
black	GOTERM_BP_ALL	GO:0032543~mitochondrial translation	19	2.11665e-10	3.92641e-07
black	GOTERM_BP_ALL	GO:0006414~translational elongation	20	2.70489e-10	5.0176e-07
black	GOTERM_BP_ALL	GO:0006415~translational termination	17	4.93762e-10	9.15935e-07
black	GOTERM_MF_ALL	GO:0015078~hydrogen ion transmembrane transporter activity	18	8.99042e-10	1.38517e-06
black	GOTERM_BP_ALL	GO:0044710~single-organism metabolic process	146	1.22741e-09	2.27686e-06
black	GOTERM_CC_ALL	GO:0005753~mitochondrial proton-transporting ATP synthase complex	10	1.4593e-09	2.15528e-06
black	GOTERM_MF_ALL	GO:0009055~electron carrier activity	18	2.04169e-09	3.14567e-06
black	GOTERM_BP_ALL	GO:0015992~proton transport	20	2.07368e-09	3.84669e-06
black	GOTERM_MF_ALL	GO:0051537~2 iron, 2 sulfur cluster binding	10	2.51941e-09	3.8817e-06
black	GOTERM_BP_ALL	GO:0006818~hydrogen transport	20	2.58605e-09	4.79715e-06
black	GOTERM_CC_ALL	GO:0005761~mitochondrial ribosome	15	3.69058e-09	5.45071e-06
black	GOTERM_CC_ALL	GO:0000313~organellar ribosome	15	3.69058e-09	5.45071e-06
black	GOTERM_BP_ALL	GO:0044237~cellular metabolic process	284	3.16281e-08	5.86705e-05
black	GOTERM_MF_ALL	GO:0003824~catalytic activity	192	3.33226e-08	5.13407e-05
black	GOTERM_CC_ALL	GO:0098796~membrane protein complex	55	3.61302e-08	5.33616e-05
black	GOTERM_CC_ALL	GO:0032991~macromolecular complex	162	3.86827e-08	5.71314e-05
black	GOTERM_BP_ALL	GO:0006996~organelle organization	131	1.00405e-07	0.000186252
black	GOTERM_BP_ALL	GO:0008152~metabolic process	300	1.09915e-07	0.000203893
black	GOTERM_BP_ALL	GO:0034641~cellular nitrogen compound metabolic process	199	1.34359e-07	0.000249237
black	GOTERM_CC_ALL	GO:0016469~proton-transporting two-sector ATPase complex	11	1.86826e-07	0.000275927
black	GOTERM_BP_ALL	GO:0042776~mitochondrial ATP synthesis coupled proton transport	8	2.68305e-07	0.000497707
black	GOTERM_CC_ALL	GO:0045263~proton-transporting ATP synthase complex, coupling factor F(o)	7	3.46059e-07	0.000511101
black	GOTERM_BP_ALL	GO:1901566~organonitrogen compound biosynthetic process	62	3.50138e-07	0.000649509
black	GOTERM_BP_ALL	GO:0006807~nitrogen compound metabolic process	206	8.35658e-07	0.00155014
black	GOTERM_BP_ALL	GO:0009145~purine nucleoside triphosphate biosynthetic process	11	1.47551e-06	0.00273704
black	GOTERM_BP_ALL	GO:0006839~mitochondrial transport	22	1.632e-06	0.00302733
black	GOTERM_CC_ALL	GO:0043234~protein complex	136	1.69478e-06	0.00250303
black	GOTERM_BP_ALL	GO:0009142~nucleoside triphosphate biosynthetic process	12	1.92627e-06	0.0035732
black	GOTERM_BP_ALL	GO:0006518~peptide metabolic process	42	1.92694e-06	0.00357443
black	GOTERM_BP_ALL	GO:0006796~phosphate-containing compound metabolic process	108	2.23056e-06	0.00413763
black	GOTERM_BP_ALL	GO:0006793~phosphorus metabolic process	108	2.44709e-06	0.00453928
black	GOTERM_BP_ALL	GO:0071704~organic substance metabolic process	287	2.6342e-06	0.00488636
black	GOTERM_MF_ALL	GO:0051540~metal cluster binding	11	2.96134e-06	0.00456249
black	GOTERM_MF_ALL	GO:0051536~iron-sulfur cluster binding	11	2.96134e-06	0.00456249
black	GOTERM_BP_ALL	GO:0015985~energy coupled proton transport, down electrochemical gradient	8	3.07625e-06	0.00570633
black	GOTERM_BP_ALL	GO:0015986~ATP synthesis coupled proton transport	8	3.07625e-06	0.00570633
black	GOTERM_CC_ALL	GO:0031970~organelle envelope lumen	12	3.12485e-06	0.00461506
black	GOTERM_BP_ALL	GO:0044711~single-organism biosynthetic process	58	3.32852e-06	0.00617427
black	GOTERM_BP_ALL	GO:0071822~protein complex subunit organization	68	3.36046e-06	0.0062335
black	GOTERM_CC_ALL	GO:0000276~mitochondrial proton-transporting ATP synthase complex, coupling factor F(o)	6	4.14971e-06	0.00612863
black	GOTERM_BP_ALL	GO:1990542~mitochondrial transmembrane transport	11	4.53321e-06	0.00840882
blue	GOTERM_CC_ALL	GO:0005634~nucleus	944	4.21591e-55	6.61836e-52
blue	GOTERM_BP_ALL	GO:0016070~RNA metabolic process	698	1.22636e-48	2.43004e-45
blue	GOTERM_BP_ALL	GO:0090304~nucleic acid metabolic process	748	3.24972e-47	6.43931e-44
blue	GOTERM_MF_ALL	GO:0003676~nucleic acid binding	637	8.9706e-47	1.50179e-43
blue	GOTERM_BP_ALL	GO:0010467~gene expression	738	4.7502e-39	9.4125e-36
blue	GOTERM_CC_ALL	GO:0005654~nucleoplasm	474	1.24623e-38	1.95639e-35
blue	GOTERM_BP_ALL	GO:0006139~nucleobase-containing compound metabolic process	786	1.85782e-38	3.68126e-35
blue	GOTERM_CC_ALL	GO:0031981~nuclear lumen	540	2.03253e-38	3.19076e-35
blue	GOTERM_CC_ALL	GO:0044428~nuclear part	580	1.0768e-37	1.69042e-34
blue	GOTERM_BP_ALL	GO:0046483~heterocycle metabolic process	795	2.22557e-37	4.40996e-34
blue	GOTERM_MF_ALL	GO:1901363~heterocyclic compound binding	803	2.05809e-36	3.44551e-33
blue	GOTERM_BP_ALL	GO:0006725~cellular aromatic compound metabolic process	795	4.97253e-36	9.85307e-33
blue	GOTERM_BP_ALL	GO:0097659~nucleic acid-templated transcription	563	1.11533e-35	2.21003e-32
blue	GOTERM_BP_ALL	GO:2000112~regulation of cellular macromolecule biosynthetic process	587	1.27094e-35	2.51836e-32
blue	GOTERM_BP_ALL	GO:0051171~regulation of nitrogen compound metabolic process	630	4.09997e-35	8.12409e-32
blue	GOTERM_MF_ALL	GO:0097159~organic cyclic compound binding	806	6.26465e-35	1.04878e-31
blue	GOTERM_BP_ALL	GO:0010468~regulation of gene expression	623	6.51374e-35	1.2907e-31
blue	GOTERM_BP_ALL	GO:0006351~transcription, DNA-templated	542	7.12116e-35	1.41106e-31
blue	GOTERM_CC_ALL	GO:0043229~intracellular organelle	1321	1.74384e-34	2.73757e-31
blue	GOTERM_BP_ALL	GO:1901360~organic cyclic compound metabolic process	807	3.33055e-34	6.59948e-31
blue	GOTERM_BP_ALL	GO:0010556~regulation of macromolecule biosynthetic process	594	6.39898e-34	1.26796e-30
blue	GOTERM_BP_ALL	GO:0032774~RNA biosynthetic process	571	1.28042e-33	2.53714e-30
blue	GOTERM_BP_ALL	GO:0031326~regulation of cellular biosynthetic process	611	2.65292e-33	5.25675e-30
blue	GOTERM_BP_ALL	GO:0051252~regulation of RNA metabolic process	554	3.16874e-33	6.27886e-30
blue	GOTERM_CC_ALL	GO:0043231~intracellular membrane-bounded organelle	1229	4.75044e-33	7.45749e-30
blue	GOTERM_BP_ALL	GO:0019219~regulation of nucleobase-containing compound metabolic process	589	1.52785e-32	3.02743e-29
blue	GOTERM_BP_ALL	GO:0034654~nucleobase-containing compound biosynthetic process	616	1.74322e-32	3.45418e-29
blue	GOTERM_BP_ALL	GO:0034645~cellular macromolecule biosynthetic process	685	1.79535e-32	3.55749e-29
blue	GOTERM_BP_ALL	GO:0034641~cellular nitrogen compound metabolic process	835	3.32557e-32	6.58962e-29
blue	GOTERM_BP_ALL	GO:0009889~regulation of biosynthetic process	613	3.54816e-32	7.03068e-29
blue	GOTERM_BP_ALL	GO:0009059~macromolecule biosynthetic process	700	6.02151e-32	1.19316e-28
blue	GOTERM_BP_ALL	GO:0044260~cellular macromolecule metabolic process	1013	8.25851e-32	1.63642e-28
blue	GOTERM_BP_ALL	GO:0018130~heterocycle biosynthetic process	617	3.9163e-31	7.76015e-28
blue	GOTERM_BP_ALL	GO:0019438~aromatic compound biosynthetic process	618	5.01317e-31	9.93358e-28
blue	GOTERM_BP_ALL	GO:0006355~regulation of transcription, DNA-templated	529	5.27826e-31	1.04589e-27
blue	GOTERM_BP_ALL	GO:1903506~regulation of nucleic acid-templated transcription	531	7.04775e-31	1.39651e-27
blue	GOTERM_CC_ALL	GO:0044424~intracellular part	1446	7.65757e-31	1.20212e-27
blue	GOTERM_BP_ALL	GO:2001141~regulation of RNA biosynthetic process	532	1.46982e-30	2.91245e-27
blue	GOTERM_BP_ALL	GO:1901362~organic cyclic compound biosynthetic process	627	2.93416e-30	5.81404e-27
blue	GOTERM_CC_ALL	GO:0005622~intracellular	1470	4.61451e-30	7.2441e-27
blue	GOTERM_BP_ALL	GO:0044271~cellular nitrogen compound biosynthetic process	669	6.13433e-30	1.21552e-26
blue	GOTERM_MF_ALL	GO:0003677~DNA binding	409	1.2787e-29	2.14071e-26
blue	GOTERM_BP_ALL	GO:0006807~nitrogen compound metabolic process	859	3.07199e-27	6.08714e-24
blue	GOTERM_CC_ALL	GO:0070013~intracellular organelle lumen	576	4.00068e-26	6.28048e-23
blue	GOTERM_BP_ALL	GO:0060255~regulation of macromolecule metabolic process	736	1.60341e-24	3.17715e-21
blue	GOTERM_CC_ALL	GO:0043233~organelle lumen	576	2.89046e-24	4.53759e-21
blue	GOTERM_BP_ALL	GO:0043170~macromolecule metabolic process	1051	3.56713e-24	7.06825e-21
blue	GOTERM_BP_ALL	GO:0031323~regulation of cellular metabolic process	737	4.4775e-24	8.87216e-21
blue	GOTERM_CC_ALL	GO:0031974~membrane-enclosed lumen	580	8.1379e-24	1.27753e-20
blue	GOTERM_BP_ALL	GO:0016569~covalent chromatin modification	131	9.52636e-24	1.88765e-20
blue	GOTERM_MF_ALL	GO:0005488~binding	1496	1.0819e-23	1.81123e-20
blue	GOTERM_CC_ALL	GO:0043226~organelle	1368	1.15204e-23	1.80853e-20
blue	GOTERM_BP_ALL	GO:0019222~regulation of metabolic process	766	2.94511e-23	5.83574e-20
blue	GOTERM_BP_ALL	GO:0080090~regulation of primary metabolic process	724	3.66764e-22	7.26743e-19
blue	GOTERM_CC_ALL	GO:0043227~membrane-bounded organelle	1285	4.72974e-22	7.42499e-19
blue	GOTERM_BP_ALL	GO:0044249~cellular biosynthetic process	755	5.69056e-22	1.12758e-18
blue	GOTERM_CC_ALL	GO:0044451~nucleoplasm part	151	1.45923e-21	2.29078e-18
blue	GOTERM_BP_ALL	GO:1901576~organic substance biosynthetic process	759	1.6551e-20	3.27959e-17
blue	GOTERM_BP_ALL	GO:0009058~biosynthetic process	767	2.91168e-20	5.76949e-17
blue	GOTERM_MF_ALL	GO:0044822~poly(A) RNA binding	209	5.49075e-19	9.19223e-16
blue	GOTERM_MF_ALL	GO:0000988~transcription factor activity, protein binding	130	1.02137e-18	1.7099e-15
blue	GOTERM_MF_ALL	GO:0000989~transcription factor activity, transcription factor binding	129	1.17136e-18	1.96101e-15
blue	GOTERM_CC_ALL	GO:0044446~intracellular organelle part	920	1.52557e-18	2.39491e-15
blue	GOTERM_MF_ALL	GO:0003723~RNA binding	264	2.02683e-18	3.39317e-15
blue	GOTERM_BP_ALL	GO:0006325~chromatin organization	150	2.48433e-18	4.92269e-15
blue	GOTERM_MF_ALL	GO:0003712~transcription cofactor activity	119	1.05453e-17	1.76542e-14
blue	GOTERM_BP_ALL	GO:0051276~chromosome organization	201	2.73663e-17	5.42263e-14
blue	GOTERM_BP_ALL	GO:0044237~cellular metabolic process	1113	3.37698e-16	6.55032e-13
blue	GOTERM_BP_ALL	GO:0016570~histone modification	99	3.43393e-16	6.55032e-13
blue	GOTERM_CC_ALL	GO:0044422~organelle part	925	6.75307e-16	1.04361e-12
blue	GOTERM_MF_ALL	GO:0046872~metal ion binding	531	2.59297e-15	4.27436e-12
blue	GOTERM_BP_ALL	GO:0044238~primary metabolic process	1109	9.75207e-15	1.93623e-11
blue	GOTERM_MF_ALL	GO:0043169~cation binding	532	1.49602e-14	2.5091e-11
blue	GOTERM_CC_ALL	GO:0043228~non-membrane-bounded organelle	494	3.17209e-14	4.9849e-11
blue	GOTERM_CC_ALL	GO:0043232~intracellular non-membrane-bounded organelle	494	3.17209e-14	4.9849e-11
blue	GOTERM_MF_ALL	GO:0003713~transcription coactivator activity	74	5.41384e-14	9.07052e-11
blue	GOTERM_MF_ALL	GO:0043167~ion binding	547	5.48124e-14	9.18154e-11
blue	GOTERM_BP_ALL	GO:0018205~peptidyl-lysine modification	89	7.44099e-14	1.47393e-10
blue	GOTERM_MF_ALL	GO:0005515~protein binding	1164	9.06559e-14	1.51856e-10
blue	GOTERM_BP_ALL	GO:0006996~organelle organization	472	5.39922e-13	1.06981e-09
blue	GOTERM_MF_ALL	GO:0003682~chromatin binding	101	7.15169e-13	1.19734e-09
blue	GOTERM_CC_ALL	GO:0044464~cell part	1577	3.34158e-12	5.24574e-09
blue	GOTERM_BP_ALL	GO:0071704~organic substance metabolic process	1136	4.08411e-12	8.09257e-09
blue	GOTERM_CC_ALL	GO:0005623~cell	1578	7.05029e-12	1.10678e-08
blue	GOTERM_BP_ALL	GO:0016071~mRNA metabolic process	120	8.09487e-12	1.60399e-08
blue	GOTERM_BP_ALL	GO:0006357~regulation of transcription from RNA polymerase II promoter	256	3.63511e-11	7.20297e-08
blue	GOTERM_BP_ALL	GO:0008152~metabolic process	1162	5.73463e-11	1.13631e-07
blue	GOTERM_BP_ALL	GO:0006396~RNA processing	147	6.88436e-11	1.36413e-07
blue	GOTERM_MF_ALL	GO:0008270~zinc ion binding	179	8.73051e-11	1.4616e-07
blue	GOTERM_BP_ALL	GO:0071840~cellular component organization or biogenesis	711	1.11504e-10	2.20946e-07
blue	GOTERM_BP_ALL	GO:0051254~positive regulation of RNA metabolic process	206	1.16057e-10	2.29967e-07
blue	GOTERM_BP_ALL	GO:0006366~transcription from RNA polymerase II promoter	252	1.20102e-10	2.37982e-07
blue	GOTERM_BP_ALL	GO:0051173~positive regulation of nitrogen compound metabolic process	246	1.26212e-10	2.50089e-07
blue	GOTERM_BP_ALL	GO:0006397~mRNA processing	90	1.28558e-10	2.54736e-07
blue	GOTERM_BP_ALL	GO:0007399~nervous system development	290	1.67531e-10	3.31962e-07
blue	GOTERM_CC_ALL	GO:0032991~macromolecular complex	556	1.89672e-10	2.97757e-07
blue	GOTERM_BP_ALL	GO:0010629~negative regulation of gene expression	212	3.49736e-10	6.93001e-07
blue	GOTERM_BP_ALL	GO:0051172~negative regulation of nitrogen compound metabolic process	214	4.25961e-10	8.44041e-07
blue	GOTERM_BP_ALL	GO:0022008~neurogenesis	207	4.98643e-10	9.88061e-07
blue	GOTERM_CC_ALL	GO:0016604~nuclear body	71	7.70247e-10	1.20917e-06
blue	GOTERM_BP_ALL	GO:2000113~negative regulation of cellular macromolecule biosynthetic process	192	7.95274e-10	1.57583e-06
blue	GOTERM_BP_ALL	GO:0050794~regulation of cellular process	1102	8.77719e-10	1.7392e-06
blue	GOTERM_BP_ALL	GO:0048699~generation of neurons	195	1.20818e-09	2.39401e-06
blue	GOTERM_CC_ALL	GO:0016607~nuclear speck	48	1.21985e-09	1.91498e-06
blue	GOTERM_BP_ALL	GO:0045935~positive regulation of nucleobase-containing compound metabolic process	229	1.24458e-09	2.46614e-06
blue	GOTERM_BP_ALL	GO:0016043~cellular component organization	688	1.49532e-09	2.96298e-06
blue	GOTERM_BP_ALL	GO:1902680~positive regulation of RNA biosynthetic process	195	2.42781e-09	4.8107e-06
blue	GOTERM_BP_ALL	GO:0071166~ribonucleoprotein complex localization	36	2.50614e-09	4.96592e-06
blue	GOTERM_BP_ALL	GO:0043933~macromolecular complex subunit organization	315	2.99238e-09	5.92939e-06
blue	GOTERM_BP_ALL	GO:0031328~positive regulation of cellular biosynthetic process	235	3.3096e-09	6.55797e-06
blue	GOTERM_BP_ALL	GO:0010558~negative regulation of macromolecule biosynthetic process	200	3.40441e-09	6.74583e-06
blue	GOTERM_BP_ALL	GO:0045893~positive regulation of transcription, DNA-templated	192	3.57047e-09	7.07487e-06
blue	GOTERM_BP_ALL	GO:1903508~positive regulation of nucleic acid-templated transcription	192	3.57047e-09	7.07487e-06
blue	GOTERM_BP_ALL	GO:0010557~positive regulation of macromolecule biosynthetic process	220	3.7039e-09	7.33928e-06
blue	GOTERM_BP_ALL	GO:0000375~RNA splicing, via transesterification reactions	63	3.72839e-09	7.3878e-06
blue	GOTERM_CC_ALL	GO:0000785~chromatin	84	3.84879e-09	6.04203e-06
blue	GOTERM_BP_ALL	GO:0009890~negative regulation of biosynthetic process	209	4.83927e-09	9.589e-06
blue	GOTERM_BP_ALL	GO:0031327~negative regulation of cellular biosynthetic process	206	5.56923e-09	1.10354e-05
blue	GOTERM_BP_ALL	GO:0000398~mRNA splicing, via spliceosome	62	5.60994e-09	1.11161e-05
blue	GOTERM_BP_ALL	GO:0000377~RNA splicing, via transesterification reactions with bulged adenosine as nucleophile	62	5.60994e-09	1.11161e-05
blue	GOTERM_BP_ALL	GO:0030182~neuron differentiation	177	5.72264e-09	1.13394e-05
blue	GOTERM_BP_ALL	GO:0006405~RNA export from nucleus	35	6.06325e-09	1.20143e-05
blue	GOTERM_CC_ALL	GO:0005730~nucleolus	133	6.56939e-09	1.0313e-05
blue	GOTERM_CC_ALL	GO:0015630~microtubule cytoskeleton	158	6.80482e-09	1.06826e-05
blue	GOTERM_CC_ALL	GO:1990234~transferase complex	116	7.25503e-09	1.13893e-05
blue	GOTERM_BP_ALL	GO:0009891~positive regulation of biosynthetic process	236	1.03016e-08	2.04127e-05
blue	GOTERM_MF_ALL	GO:0044877~macromolecular complex binding	186	1.25125e-08	2.09476e-05
blue	GOTERM_BP_ALL	GO:0050789~regulation of biological process	1133	1.2917e-08	2.55951e-05
blue	GOTERM_CC_ALL	GO:0005694~chromosome	138	1.49172e-08	2.34179e-05
blue	GOTERM_BP_ALL	GO:0071427~mRNA-containing ribonucleoprotein complex export from nucleus	31	1.60486e-08	3.18002e-05
blue	GOTERM_BP_ALL	GO:0006406~mRNA export from nucleus	31	1.60486e-08	3.18002e-05
blue	GOTERM_CC_ALL	GO:0070603~SWI/SNF superfamily-type complex	25	2.51141e-08	3.94254e-05
blue	GOTERM_BP_ALL	GO:0008380~RNA splicing	74	2.74467e-08	5.43855e-05
blue	GOTERM_BP_ALL	GO:0071426~ribonucleoprotein complex export from nucleus	33	2.78194e-08	5.51241e-05
blue	GOTERM_BP_ALL	GO:0009892~negative regulation of metabolic process	316	2.83641e-08	5.62033e-05
blue	GOTERM_MF_ALL	GO:0003700~transcription factor activity, sequence-specific DNA binding	175	4.2444e-08	7.10567e-05
blue	GOTERM_MF_ALL	GO:0001071~nucleic acid binding transcription factor activity	175	4.439e-08	7.43144e-05
blue	GOTERM_BP_ALL	GO:0010628~positive regulation of gene expression	225	5.05984e-08	0.000100261
blue	GOTERM_BP_ALL	GO:0045934~negative regulation of nucleobase-containing compound metabolic process	189	5.53917e-08	0.000109758
blue	GOTERM_BP_ALL	GO:0010605~negative regulation of macromolecule metabolic process	293	6.44884e-08	0.000127784
blue	GOTERM_BP_ALL	GO:0043412~macromolecule modification	473	6.89649e-08	0.000136654
blue	GOTERM_MF_ALL	GO:0070577~lysine-acetylated histone binding	12	9.64784e-08	0.000161517
blue	GOTERM_MF_ALL	GO:0008134~transcription factor binding	87	1.23627e-07	0.000206966
blue	GOTERM_BP_ALL	GO:0045892~negative regulation of transcription, DNA-templated	160	1.26497e-07	0.000250653
blue	GOTERM_BP_ALL	GO:0006403~RNA localization	46	1.45154e-07	0.000287621
blue	GOTERM_BP_ALL	GO:1903507~negative regulation of nucleic acid-templated transcription	165	1.50751e-07	0.000298712
blue	GOTERM_BP_ALL	GO:0051253~negative regulation of RNA metabolic process	172	1.63446e-07	0.000323868
blue	GOTERM_BP_ALL	GO:0031175~neuron projection development	123	1.81368e-07	0.00035938
blue	GOTERM_BP_ALL	GO:0031324~negative regulation of cellular metabolic process	292	2.01099e-07	0.000398477
blue	GOTERM_MF_ALL	GO:0004386~helicase activity	38	2.30512e-07	0.000385906
blue	KEGG_PATHWAY	hsa04360:Axon guidance	29	2.33572e-07	0.000304002
blue	GOTERM_BP_ALL	GO:1902679~negative regulation of RNA biosynthetic process	166	2.36589e-07	0.000468799
blue	GOTERM_BP_ALL	GO:0043009~chordate embryonic development	93	3.48585e-07	0.000690717
blue	GOTERM_BP_ALL	GO:0048666~neuron development	139	3.67014e-07	0.000727235
blue	GOTERM_BP_ALL	GO:0018393~internal peptidyl-lysine acetylation	36	3.69345e-07	0.000731854
blue	GOTERM_BP_ALL	GO:0007049~cell cycle	218	3.9388e-07	0.00078047
blue	GOTERM_BP_ALL	GO:0065007~biological regulation	1178	4.38297e-07	0.000868481
blue	GOTERM_BP_ALL	GO:0006259~DNA metabolic process	142	4.51316e-07	0.000894279
blue	GOTERM_BP_ALL	GO:0009792~embryo development ending in birth or egg hatching	93	5.63215e-07	0.001116
blue	GOTERM_BP_ALL	GO:0051028~mRNA transport	35	5.66697e-07	0.0011229
blue	GOTERM_BP_ALL	GO:0018193~peptidyl-amino acid modification	163	6.21362e-07	0.00123122
blue	GOTERM_CC_ALL	GO:1902494~catalytic complex	148	6.31961e-07	0.000992081
blue	GOTERM_BP_ALL	GO:1902275~regulation of chromatin organization	37	6.50606e-07	0.00128917
blue	GOTERM_BP_ALL	GO:0022402~cell cycle process	182	6.80856e-07	0.00134911
blue	GOTERM_MF_ALL	GO:0046914~transition metal ion binding	190	9.07033e-07	0.00151848
blue	GOTERM_BP_ALL	GO:0006475~internal protein amino acid acetylation	36	9.94384e-07	0.00197035
blue	GOTERM_BP_ALL	GO:0018394~peptidyl-lysine acetylation	37	1.04366e-06	0.00206798
blue	GOTERM_MF_ALL	GO:0000166~nucleotide binding	294	1.13049e-06	0.00189257
blue	GOTERM_MF_ALL	GO:0070035~purine NTP-dependent helicase activity	28	1.23766e-06	0.00207198
blue	GOTERM_MF_ALL	GO:0008026~ATP-dependent helicase activity	28	1.23766e-06	0.00207198
blue	GOTERM_MF_ALL	GO:1901265~nucleoside phosphate binding	294	1.24873e-06	0.00209052
blue	GOTERM_BP_ALL	GO:0051168~nuclear export	40	1.31176e-06	0.00259921
blue	GOTERM_MF_ALL	GO:0003714~transcription corepressor activity	46	1.40793e-06	0.00235702
blue	GOTERM_BP_ALL	GO:0051236~establishment of RNA localization	39	1.49151e-06	0.00295538
blue	GOTERM_CC_ALL	GO:0044427~chromosomal part	117	1.69851e-06	0.00266638
blue	GOTERM_CC_ALL	GO:0005856~cytoskeleton	248	1.90312e-06	0.00298757
blue	GOTERM_BP_ALL	GO:0030516~regulation of axon extension	25	2.04531e-06	0.00405269
blue	GOTERM_BP_ALL	GO:1905268~negative regulation of chromatin organization	17	2.38585e-06	0.00472745
blue	GOTERM_BP_ALL	GO:0006974~cellular response to DNA damage stimulus	117	2.52729e-06	0.0050077
blue	GOTERM_BP_ALL	GO:0050658~RNA transport	38	2.60381e-06	0.00515932
blue	GOTERM_BP_ALL	GO:0050657~nucleic acid transport	38	2.60381e-06	0.00515932
blue	GOTERM_CC_ALL	GO:0043234~protein complex	453	2.61351e-06	0.00410275
blue	GOTERM_BP_ALL	GO:0031057~negative regulation of histone modification	15	3.23194e-06	0.00640388
blue	GOTERM_BP_ALL	GO:0016573~histone acetylation	33	4.14383e-06	0.00821068
blue	GOTERM_BP_ALL	GO:0048675~axon extension	27	4.27712e-06	0.00847476
blue	GOTERM_CC_ALL	GO:0005874~microtubule	66	4.59423e-06	0.00721201
blue	GOTERM_BP_ALL	GO:0000122~negative regulation of transcription from RNA polymerase II promoter	109	4.60035e-06	0.0091152
blue	GOTERM_MF_ALL	GO:0001076~transcription factor activity, RNA polymerase II transcription factor binding	33	4.95489e-06	0.00829479
blue	GOTERM_MF_ALL	GO:0001104~RNA polymerase II transcription cofactor activity	25	5.43559e-06	0.00909948
brown	GOTERM_CC_ALL	GO:0045202~synapse	193	6.18775e-43	9.71122e-40
brown	GOTERM_CC_ALL	GO:0097458~neuron part	274	5.07445e-42	7.96398e-39
brown	GOTERM_BP_ALL	GO:0099536~synaptic signaling	167	3.38732e-41	6.74742e-38
brown	GOTERM_BP_ALL	GO:0099537~trans-synaptic signaling	167	3.38732e-41	6.74742e-38
brown	GOTERM_BP_ALL	GO:0007268~chemical synaptic transmission	167	3.38732e-41	6.74742e-38
brown	GOTERM_BP_ALL	GO:0098916~anterograde trans-synaptic signaling	167	3.38732e-41	6.74742e-38
brown	GOTERM_CC_ALL	GO:0044456~synapse part	164	1.3427e-39	2.10728e-36
brown	GOTERM_CC_ALL	GO:0043005~neuron projection	215	6.1684e-38	9.68087e-35
brown	GOTERM_CC_ALL	GO:0044444~cytoplasmic part	947	1.20607e-31	1.89284e-28
brown	GOTERM_CC_ALL	GO:0016020~membrane	1062	5.05623e-30	7.93538e-27
brown	GOTERM_BP_ALL	GO:0050804~modulation of synaptic transmission	92	9.47309e-29	1.88701e-25
brown	GOTERM_CC_ALL	GO:0005737~cytoplasm	1168	1.41571e-28	2.22186e-25
brown	GOTERM_BP_ALL	GO:0006810~transport	611	2.84624e-28	5.66961e-25
brown	GOTERM_BP_ALL	GO:1902578~single-organism localization	502	5.83208e-28	1.16173e-24
brown	GOTERM_BP_ALL	GO:0051234~establishment of localization	620	2.7841e-27	5.54584e-24
brown	GOTERM_BP_ALL	GO:0044765~single-organism transport	474	5.36476e-26	1.06864e-22
brown	GOTERM_BP_ALL	GO:0007267~cell-cell signaling	258	4.28067e-25	8.52696e-22
brown	GOTERM_CC_ALL	GO:0098588~bounding membrane of organelle	281	2.18671e-24	3.43189e-21
brown	GOTERM_CC_ALL	GO:0036477~somatodendritic compartment	144	2.88066e-24	4.52099e-21
brown	GOTERM_CC_ALL	GO:0044425~membrane part	821	5.7521e-24	9.0275e-21
brown	GOTERM_CC_ALL	GO:0042995~cell projection	291	1.06974e-23	1.67888e-20
brown	GOTERM_BP_ALL	GO:0006811~ion transport	246	2.1721e-23	4.32675e-20
brown	GOTERM_BP_ALL	GO:0051179~localization	710	2.22187e-23	4.4259e-20
brown	GOTERM_CC_ALL	GO:0030424~axon	106	2.81156e-23	4.41255e-20
brown	GOTERM_BP_ALL	GO:0048167~regulation of synaptic plasticity	57	3.80703e-23	7.58347e-20
brown	GOTERM_CC_ALL	GO:0034702~ion channel complex	84	5.5741e-23	8.74814e-20
brown	GOTERM_CC_ALL	GO:0097060~synaptic membrane	82	8.42604e-23	1.32241e-19
brown	GOTERM_CC_ALL	GO:1902495~transmembrane transporter complex	90	9.78381e-23	1.5355e-19
brown	GOTERM_BP_ALL	GO:0034220~ion transmembrane transport	182	1.25189e-22	2.49373e-19
brown	GOTERM_CC_ALL	GO:0098793~presynapse	82	3.82236e-22	5.99892e-19
brown	GOTERM_CC_ALL	GO:1990351~transporter complex	90	3.82318e-22	6.0002e-19
brown	GOTERM_CC_ALL	GO:0098794~postsynapse	97	6.32854e-22	9.93219e-19
brown	GOTERM_MF_ALL	GO:0022836~gated channel activity	90	1.05345e-21	1.80423e-18
brown	GOTERM_BP_ALL	GO:0051049~regulation of transport	280	1.92464e-21	3.83382e-18
brown	GOTERM_CC_ALL	GO:0016023~cytoplasmic, membrane-bounded vesicle	205	2.63852e-21	4.14096e-18
brown	GOTERM_CC_ALL	GO:0031410~cytoplasmic vesicle	217	3.47738e-21	5.45751e-18
brown	GOTERM_CC_ALL	GO:0097708~intracellular vesicle	217	4.22067e-21	6.62404e-18
brown	GOTERM_BP_ALL	GO:0050803~regulation of synapse structure or activity	73	4.34209e-21	8.6493e-18
brown	GOTERM_CC_ALL	GO:0030054~cell junction	227	1.06714e-20	1.6748e-17
brown	GOTERM_CC_ALL	GO:0012505~endomembrane system	498	1.31619e-20	2.06567e-17
brown	GOTERM_BP_ALL	GO:0098660~inorganic ion transmembrane transport	145	2.23416e-20	4.45038e-17
brown	GOTERM_BP_ALL	GO:0055085~transmembrane transport	220	4.0554e-20	8.07821e-17
brown	GOTERM_BP_ALL	GO:0030001~metal ion transport	156	5.05944e-20	1.00782e-16
brown	GOTERM_CC_ALL	GO:0098805~whole membrane	223	5.29741e-20	8.31391e-17
brown	GOTERM_CC_ALL	GO:0030425~dendrite	107	5.49474e-20	8.6236e-17
brown	GOTERM_CC_ALL	GO:0031090~organelle membrane	367	5.55377e-20	8.71624e-17
brown	GOTERM_CC_ALL	GO:0034703~cation channel complex	59	9.23112e-20	1.44876e-16
brown	GOTERM_CC_ALL	GO:0033267~axon part	67	1.2889e-19	2.02283e-16
brown	GOTERM_CC_ALL	GO:0044459~plasma membrane part	362	5.33697e-19	8.37599e-16
brown	GOTERM_BP_ALL	GO:0098655~cation transmembrane transport	138	1.09169e-18	2.1746e-15
brown	GOTERM_CC_ALL	GO:0098590~plasma membrane region	167	1.17283e-18	1.84068e-15
brown	GOTERM_BP_ALL	GO:0034765~regulation of ion transmembrane transport	94	1.20027e-18	2.39091e-15
brown	GOTERM_BP_ALL	GO:0098662~inorganic cation transmembrane transport	128	2.43914e-18	4.85868e-15
brown	GOTERM_CC_ALL	GO:0071944~cell periphery	624	2.4941e-18	3.91431e-15
brown	GOTERM_BP_ALL	GO:0023052~signaling	723	3.43733e-18	6.84705e-15
brown	GOTERM_MF_ALL	GO:0005216~ion channel activity	98	3.72656e-18	6.38244e-15
brown	GOTERM_CC_ALL	GO:0005886~plasma membrane	612	3.74248e-18	5.87356e-15
brown	GOTERM_BP_ALL	GO:0034762~regulation of transmembrane transport	94	1.37083e-17	2.73066e-14
brown	GOTERM_BP_ALL	GO:0032940~secretion by cell	169	1.38259e-17	2.75408e-14
brown	GOTERM_CC_ALL	GO:0098796~membrane protein complex	181	1.40918e-17	2.2116e-14
brown	GOTERM_BP_ALL	GO:0006812~cation transport	170	1.52656e-17	3.04085e-14
brown	GOTERM_MF_ALL	GO:0022838~substrate-specific channel activity	99	1.63021e-17	2.79205e-14
brown	GOTERM_MF_ALL	GO:0015075~ion transmembrane transporter activity	149	1.65902e-17	2.84138e-14
brown	GOTERM_MF_ALL	GO:0022891~substrate-specific transmembrane transporter activity	166	1.98311e-17	3.39645e-14
brown	GOTERM_MF_ALL	GO:0022857~transmembrane transporter activity	175	3.18529e-17	5.45541e-14
brown	GOTERM_BP_ALL	GO:0043269~regulation of ion transport	114	4.34623e-17	8.65754e-14
brown	GOTERM_CC_ALL	GO:0030133~transport vesicle	83	7.4601e-17	1.77636e-13
brown	GOTERM_CC_ALL	GO:0060076~excitatory synapse	59	8.54494e-17	1.77636e-13
brown	GOTERM_BP_ALL	GO:0007154~cell communication	719	1.51594e-16	2.22045e-13
brown	GOTERM_BP_ALL	GO:0044700~single organism signaling	712	1.6389e-16	2.22045e-13
brown	GOTERM_CC_ALL	GO:0034705~potassium channel complex	38	3.24757e-16	5.21805e-13
brown	GOTERM_CC_ALL	GO:0044463~cell projection part	162	6.87888e-16	1.04361e-12
brown	GOTERM_BP_ALL	GO:0046903~secretion	181	6.92326e-16	1.33227e-12
brown	GOTERM_CC_ALL	GO:0008021~synaptic vesicle	45	7.22757e-16	1.22125e-12
brown	GOTERM_BP_ALL	GO:0023061~signal release	92	1.07503e-15	2.20934e-12
brown	GOTERM_MF_ALL	GO:0015267~channel activity	100	1.23464e-15	2.08722e-12
brown	GOTERM_MF_ALL	GO:0022803~passive transmembrane transporter activity	100	1.35464e-15	2.28706e-12
brown	GOTERM_CC_ALL	GO:0014069~postsynaptic density	55	1.46319e-15	2.26485e-12
brown	GOTERM_CC_ALL	GO:0099572~postsynaptic specialization	55	1.46319e-15	2.26485e-12
brown	GOTERM_CC_ALL	GO:0008076~voltage-gated potassium channel complex	37	1.72518e-15	2.78666e-12
brown	GOTERM_BP_ALL	GO:0006813~potassium ion transport	60	1.78613e-15	3.54161e-12
brown	GOTERM_CC_ALL	GO:0070382~exocytic vesicle	47	2.26092e-15	3.4861e-12
brown	GOTERM_BP_ALL	GO:0008104~protein localization	331	2.5535e-15	5.08482e-12
brown	GOTERM_CC_ALL	GO:0045211~postsynaptic membrane	59	4.20102e-15	6.61693e-12
brown	GOTERM_BP_ALL	GO:0065008~regulation of biological quality	444	5.79932e-15	1.15019e-11
brown	GOTERM_BP_ALL	GO:0032879~regulation of localization	332	6.39251e-15	1.28231e-11
brown	GOTERM_MF_ALL	GO:0022892~substrate-specific transporter activity	181	8.63759e-15	1.48326e-11
brown	GOTERM_MF_ALL	GO:0046873~metal ion transmembrane transporter activity	90	1.13236e-14	1.93956e-11
brown	GOTERM_MF_ALL	GO:0008324~cation transmembrane transporter activity	116	1.43978e-14	2.47136e-11
brown	GOTERM_BP_ALL	GO:0023051~regulation of signaling	393	1.50592e-14	3.00759e-11
brown	GOTERM_CC_ALL	GO:0030659~cytoplasmic vesicle membrane	99	1.78498e-14	2.80553e-11
brown	GOTERM_BP_ALL	GO:0015672~monovalent inorganic cation transport	99	1.85092e-14	3.69371e-11
brown	GOTERM_CC_ALL	GO:0012506~vesicle membrane	101	2.10822e-14	3.31069e-11
brown	GOTERM_BP_ALL	GO:0051650~establishment of vesicle localization	63	2.31274e-14	4.59965e-11
brown	GOTERM_MF_ALL	GO:0022832~voltage-gated channel activity	54	2.36928e-14	4.05009e-11
brown	GOTERM_MF_ALL	GO:0005244~voltage-gated ion channel activity	54	2.36928e-14	4.05009e-11
brown	GOTERM_BP_ALL	GO:0016192~vesicle-mediated transport	222	2.78696e-14	5.55112e-11
brown	GOTERM_BP_ALL	GO:0006887~exocytosis	87	3.23259e-14	6.43596e-11
brown	GOTERM_BP_ALL	GO:0048489~synaptic vesicle transport	43	3.24905e-14	6.47926e-11
brown	GOTERM_BP_ALL	GO:0097480~establishment of synaptic vesicle localization	43	3.24905e-14	6.47926e-11
brown	GOTERM_MF_ALL	GO:0022890~inorganic cation transmembrane transporter activity	102	3.73422e-14	6.38933e-11
brown	GOTERM_MF_ALL	GO:0005261~cation channel activity	72	4.31004e-14	7.37743e-11
brown	GOTERM_BP_ALL	GO:0097479~synaptic vesicle localization	44	5.34541e-14	1.0637e-10
brown	GOTERM_CC_ALL	GO:0044306~neuron projection terminus	42	6.0483e-14	9.49574e-11
brown	GOTERM_BP_ALL	GO:0051648~vesicle localization	64	7.18198e-14	1.43086e-10
brown	GOTERM_CC_ALL	GO:0031982~vesicle	456	7.50158e-14	1.17784e-10
brown	GOTERM_BP_ALL	GO:0044763~single-organism cellular process	1229	7.8471e-14	1.56353e-10
brown	GOTERM_CC_ALL	GO:0031988~membrane-bounded vesicle	441	1.02162e-13	1.60305e-10
brown	GOTERM_BP_ALL	GO:0051641~cellular localization	334	1.02251e-13	2.03682e-10
brown	GOTERM_BP_ALL	GO:0099504~synaptic vesicle cycle	40	1.06035e-13	2.11198e-10
brown	GOTERM_BP_ALL	GO:0060627~regulation of vesicle-mediated transport	92	1.18998e-13	2.37077e-10
brown	GOTERM_MF_ALL	GO:0005215~transporter activity	199	1.37795e-13	2.35967e-10
brown	GOTERM_BP_ALL	GO:0044710~single-organism metabolic process	488	2.11738e-13	4.2174e-10
brown	GOTERM_BP_ALL	GO:0017156~calcium ion regulated exocytosis	39	2.15692e-13	4.29701e-10
brown	GOTERM_BP_ALL	GO:0006836~neurotransmitter transport	54	2.1701e-13	4.32354e-10
brown	GOTERM_BP_ALL	GO:0099003~vesicle mediated transport in synapse	37	2.35977e-13	4.69946e-10
brown	GOTERM_BP_ALL	GO:0010646~regulation of cell communication	382	2.67583e-13	5.32974e-10
brown	GOTERM_BP_ALL	GO:0006793~phosphorus metabolic process	389	2.70999e-13	5.39835e-10
brown	GOTERM_CC_ALL	GO:0044433~cytoplasmic vesicle part	112	3.95956e-13	6.21347e-10
brown	GOTERM_BP_ALL	GO:0033036~macromolecule localization	360	4.12818e-13	8.22242e-10
brown	GOTERM_BP_ALL	GO:0017157~regulation of exocytosis	50	4.3062e-13	8.57847e-10
brown	GOTERM_BP_ALL	GO:0006796~phosphate-containing compound metabolic process	387	5.53328e-13	1.10223e-09
brown	GOTERM_BP_ALL	GO:0045184~establishment of protein localization	275	6.23114e-13	1.24133e-09
brown	GOTERM_CC_ALL	GO:0099503~secretory vesicle	92	6.717e-13	1.05416e-09
brown	GOTERM_BP_ALL	GO:1903530~regulation of secretion by cell	114	7.61261e-13	1.51644e-09
brown	GOTERM_BP_ALL	GO:0001505~regulation of neurotransmitter levels	53	8.24952e-13	1.64339e-09
brown	KEGG_PATHWAY	hsa04020:Calcium signaling pathway	52	1.02652e-12	1.35504e-09
brown	GOTERM_BP_ALL	GO:0007269~neurotransmitter secretion	43	1.0296e-12	2.05097e-09
brown	GOTERM_BP_ALL	GO:0099643~signal release from synapse	43	1.0296e-12	2.05097e-09
brown	GOTERM_CC_ALL	GO:0043679~axon terminus	38	1.07292e-12	1.68388e-09
brown	GOTERM_CC_ALL	GO:0043025~neuronal cell body	85	1.07623e-12	1.68909e-09
brown	GOTERM_BP_ALL	GO:0071805~potassium ion transmembrane transport	50	1.69852e-12	3.38342e-09
brown	GOTERM_BP_ALL	GO:0071804~cellular potassium ion transport	50	1.69852e-12	3.38342e-09
brown	GOTERM_BP_ALL	GO:0050806~positive regulation of synaptic transmission	37	2.29898e-12	4.5794e-09
brown	GOTERM_BP_ALL	GO:0048168~regulation of neuronal synaptic plasticity	24	2.88465e-12	5.74621e-09
brown	GOTERM_BP_ALL	GO:0007610~behavior	103	2.91636e-12	5.80924e-09
brown	GOTERM_CC_ALL	GO:0044297~cell body	92	3.37754e-12	5.30077e-09
brown	GOTERM_CC_ALL	GO:0030672~synaptic vesicle membrane	27	3.90753e-12	6.13261e-09
brown	GOTERM_CC_ALL	GO:0099501~exocytic vesicle membrane	27	3.90753e-12	6.13261e-09
brown	GOTERM_BP_ALL	GO:0099531~presynaptic process involved in chemical synaptic transmission	43	4.87574e-12	9.71236e-09
brown	GOTERM_BP_ALL	GO:0007611~learning or memory	55	6.83282e-12	1.36108e-08
brown	KEGG_PATHWAY	hsa04721:Synaptic vesicle cycle	28	7.45534e-12	9.84137e-09
brown	GOTERM_CC_ALL	GO:0043209~myelin sheath	47	1.0788e-11	1.6931e-08
brown	GOTERM_CC_ALL	GO:0005829~cytosol	409	1.22273e-11	1.91897e-08
brown	GOTERM_BP_ALL	GO:0015031~protein transport	252	1.23987e-11	2.46979e-08
brown	GOTERM_CC_ALL	GO:0030658~transport vesicle membrane	44	1.79848e-11	2.82259e-08
brown	GOTERM_CC_ALL	GO:0005773~vacuole	178	1.85945e-11	2.91828e-08
brown	GOTERM_MF_ALL	GO:0015079~potassium ion transmembrane transporter activity	43	1.96495e-11	3.36535e-08
brown	GOTERM_BP_ALL	GO:0050890~cognition	59	2.29353e-11	4.56864e-08
brown	GOTERM_BP_ALL	GO:0045055~regulated exocytosis	64	2.69452e-11	5.36738e-08
brown	GOTERM_BP_ALL	GO:0044708~single-organism behavior	79	2.73634e-11	5.45068e-08
brown	GOTERM_BP_ALL	GO:0048878~chemical homeostasis	160	2.7679e-11	5.51358e-08
brown	GOTERM_BP_ALL	GO:0051046~regulation of secretion	116	3.24447e-11	6.46288e-08
brown	GOTERM_BP_ALL	GO:0016079~synaptic vesicle exocytosis	31	3.25667e-11	6.48716e-08
brown	GOTERM_CC_ALL	GO:0098797~plasma membrane protein complex	95	5.14921e-11	8.0813e-08
brown	KEGG_PATHWAY	hsa04921:Oxytocin signaling pathway	44	5.30059e-11	6.99699e-08
brown	GOTERM_BP_ALL	GO:0071702~organic substance transport	333	5.70137e-11	1.13569e-07
brown	GOTERM_MF_ALL	GO:0015077~monovalent inorganic cation transmembrane transporter activity	72	5.87393e-11	1.00602e-07
brown	GOTERM_MF_ALL	GO:0022843~voltage-gated cation channel activity	39	6.00268e-11	1.02807e-07
brown	GOTERM_BP_ALL	GO:0044699~single-organism process	1305	6.49664e-11	1.29411e-07
brown	GOTERM_BP_ALL	GO:0007270~neuron-neuron synaptic transmission	33	1.29682e-10	2.58322e-07
brown	KEGG_PATHWAY	hsa04911:Insulin secretion	31	1.76461e-10	2.32936e-07
brown	GOTERM_MF_ALL	GO:0005267~potassium channel activity	36	1.82115e-10	3.11906e-07
brown	KEGG_PATHWAY	hsa04723:Retrograde endocannabinoid signaling	34	2.26365e-10	2.98811e-07
brown	GOTERM_BP_ALL	GO:0042391~regulation of membrane potential	72	2.28085e-10	4.54338e-07
brown	GOTERM_BP_ALL	GO:0055082~cellular chemical homeostasis	117	2.36557e-10	4.71214e-07
brown	GOTERM_CC_ALL	GO:0048471~perinuclear region of cytoplasm	107	2.54196e-10	3.98943e-07
brown	GOTERM_BP_ALL	GO:0030072~peptide hormone secretion	55	2.77318e-10	5.52409e-07
brown	GOTERM_MF_ALL	GO:0019899~enzyme binding	236	3.73513e-10	6.39711e-07
brown	GOTERM_CC_ALL	GO:0044437~vacuolar part	116	3.87992e-10	6.08926e-07
brown	GOTERM_BP_ALL	GO:0032409~regulation of transporter activity	49	4.74848e-10	9.45881e-07
brown	GOTERM_MF_ALL	GO:0016301~kinase activity	140	4.92599e-10	8.43668e-07
brown	GOTERM_BP_ALL	GO:0032412~regulation of ion transmembrane transporter activity	46	5.27212e-10	1.05019e-06
brown	GOTERM_BP_ALL	GO:0019725~cellular homeostasis	130	6.09747e-10	1.2146e-06
brown	KEGG_PATHWAY	hsa04261:Adrenergic signaling in cardiomyocytes	40	6.80679e-10	8.98523e-07
brown	KEGG_PATHWAY	hsa04024:cAMP signaling pathway	50	7.07159e-10	9.33477e-07
brown	GOTERM_BP_ALL	GO:1904062~regulation of cation transmembrane transport	50	7.16312e-10	1.42687e-06
brown	GOTERM_CC_ALL	GO:0005774~vacuolar membrane	102	7.599e-10	1.19261e-06
brown	GOTERM_BP_ALL	GO:0017158~regulation of calcium ion-dependent exocytosis	27	7.76494e-10	1.54675e-06
brown	GOTERM_BP_ALL	GO:0046928~regulation of neurotransmitter secretion	22	8.63253e-10	1.71957e-06
brown	GOTERM_BP_ALL	GO:0002790~peptide secretion	55	1.14674e-09	2.28426e-06
brown	GOTERM_CC_ALL	GO:0005887~integral component of plasma membrane	217	1.17221e-09	1.8397e-06
brown	GOTERM_CC_ALL	GO:0031226~intrinsic component of plasma membrane	224	1.22702e-09	1.92572e-06
brown	GOTERM_BP_ALL	GO:0051649~establishment of localization in cell	258	1.31021e-09	2.60989e-06
brown	GOTERM_BP_ALL	GO:0022898~regulation of transmembrane transporter activity	46	1.32006e-09	2.62951e-06
brown	GOTERM_CC_ALL	GO:0031224~intrinsic component of membrane	645	1.42957e-09	2.2436e-06
brown	GOTERM_BP_ALL	GO:1902803~regulation of synaptic vesicle transport	18	1.57133e-09	3.13004e-06
brown	GOTERM_CC_ALL	GO:0042734~presynaptic membrane	24	1.8189e-09	2.85463e-06
brown	GOTERM_BP_ALL	GO:0060078~regulation of postsynaptic membrane potential	28	1.85655e-09	3.69818e-06
brown	GOTERM_CC_ALL	GO:0044304~main axon	23	3.71963e-09	5.83769e-06
brown	KEGG_PATHWAY	hsa04713:Circadian entrainment	31	3.78671e-09	4.9986e-06
brown	GOTERM_CC_ALL	GO:0016021~integral component of membrane	631	4.88464e-09	7.66608e-06
brown	GOTERM_BP_ALL	GO:0010256~endomembrane system organization	94	4.94164e-09	9.84357e-06
brown	GOTERM_BP_ALL	GO:0042886~amide transport	59	5.19171e-09	1.03417e-05
brown	GOTERM_BP_ALL	GO:0015833~peptide transport	56	5.65223e-09	1.12591e-05
brown	GOTERM_MF_ALL	GO:0032553~ribonucleotide binding	242	5.7028e-09	9.76712e-06
brown	GOTERM_BP_ALL	GO:0035637~multicellular organismal signaling	38	8.09588e-09	1.61267e-05
brown	GOTERM_MF_ALL	GO:0005249~voltage-gated potassium channel activity	28	8.43441e-09	1.44455e-05
brown	GOTERM_BP_ALL	GO:0031175~neuron projection development	124	8.75296e-09	1.74356e-05
brown	GOTERM_BP_ALL	GO:0070588~calcium ion transmembrane transport	55	8.76691e-09	1.74634e-05
brown	GOTERM_BP_ALL	GO:0007399~nervous system development	271	9.08959e-09	1.81061e-05
brown	GOTERM_BP_ALL	GO:1901699~cellular response to nitrogen compound	93	9.53133e-09	1.89861e-05
brown	GOTERM_BP_ALL	GO:0051588~regulation of neurotransmitter transport	23	1.33131e-08	2.65193e-05
brown	GOTERM_BP_ALL	GO:0035556~intracellular signal transduction	320	1.38948e-08	2.7678e-05
brown	GOTERM_BP_ALL	GO:0006873~cellular ion homeostasis	96	1.50714e-08	3.00218e-05
brown	GOTERM_BP_ALL	GO:0030003~cellular cation homeostasis	94	1.7395e-08	3.46502e-05
brown	GOTERM_CC_ALL	GO:0005794~Golgi apparatus	195	1.91721e-08	3.00892e-05
brown	GOTERM_BP_ALL	GO:0010959~regulation of metal ion transport	62	2.06416e-08	4.11173e-05
brown	GOTERM_BP_ALL	GO:1903522~regulation of blood circulation	59	2.1464e-08	4.27555e-05
brown	GOTERM_MF_ALL	GO:0032555~purine ribonucleotide binding	237	2.48692e-08	4.25932e-05
brown	GOTERM_BP_ALL	GO:0007612~learning	35	2.65264e-08	5.28398e-05
brown	GOTERM_BP_ALL	GO:0061024~membrane organization	146	2.80037e-08	5.57824e-05
brown	GOTERM_MF_ALL	GO:0017076~purine nucleotide binding	238	2.82219e-08	4.83352e-05
brown	GOTERM_BP_ALL	GO:0046879~hormone secretion	58	2.89028e-08	5.75733e-05
brown	GOTERM_BP_ALL	GO:1901698~response to nitrogen compound	131	2.91583e-08	5.80823e-05
brown	GOTERM_BP_ALL	GO:0070838~divalent metal ion transport	74	3.03833e-08	6.05226e-05
brown	GOTERM_BP_ALL	GO:0050796~regulation of insulin secretion	41	3.12163e-08	6.21818e-05
brown	GOTERM_BP_ALL	GO:0050801~ion homeostasis	108	3.59159e-08	7.15433e-05
brown	GOTERM_CC_ALL	GO:0005768~endosome	120	3.63192e-08	5.70004e-05
brown	GOTERM_MF_ALL	GO:0016773~phosphotransferase activity, alcohol group as acceptor	117	3.73146e-08	6.39082e-05
brown	GOTERM_BP_ALL	GO:0051656~establishment of organelle localization	74	3.76872e-08	7.50715e-05
brown	GOTERM_MF_ALL	GO:0005543~phospholipid binding	65	4.07494e-08	6.97909e-05
brown	GOTERM_BP_ALL	GO:0010975~regulation of neuron projection development	73	4.12104e-08	8.20898e-05
brown	GOTERM_BP_ALL	GO:0072511~divalent inorganic cation transport	74	4.1754e-08	8.31725e-05
brown	GOTERM_MF_ALL	GO:0022834~ligand-gated channel activity	36	4.21154e-08	7.21305e-05
brown	GOTERM_MF_ALL	GO:0015276~ligand-gated ion channel activity	36	4.21154e-08	7.21305e-05
brown	GOTERM_BP_ALL	GO:0048812~neuron projection morphogenesis	89	4.5668e-08	9.0969e-05
brown	GOTERM_BP_ALL	GO:0019637~organophosphate metabolic process	154	4.76677e-08	9.49523e-05
brown	GOTERM_BP_ALL	GO:0048666~neuron development	138	4.93486e-08	9.83007e-05
brown	GOTERM_BP_ALL	GO:0044057~regulation of system process	84	5.39216e-08	0.00010741
brown	GOTERM_BP_ALL	GO:0006816~calcium ion transport	67	5.58451e-08	0.000111241
brown	GOTERM_CC_ALL	GO:0043195~terminal bouton	22	5.82801e-08	9.14664e-05
brown	GOTERM_MF_ALL	GO:0003824~catalytic activity	636	6.56145e-08	0.000112377
brown	GOTERM_BP_ALL	GO:0016050~vesicle organization	57	7.18091e-08	0.000143041
brown	GOTERM_BP_ALL	GO:0098771~inorganic ion homeostasis	102	7.60449e-08	0.000151479
brown	GOTERM_BP_ALL	GO:0010243~response to organonitrogen compound	117	8.76067e-08	0.00017451
brown	GOTERM_BP_ALL	GO:0055080~cation homeostasis	100	8.87621e-08	0.000176811
brown	GOTERM_MF_ALL	GO:0098772~molecular function regulator	183	9.15621e-08	0.000156817
brown	GOTERM_MF_ALL	GO:0032559~adenyl ribonucleotide binding	197	9.87495e-08	0.000169127
brown	GOTERM_MF_ALL	GO:0030554~adenyl nucleotide binding	198	1.05148e-07	0.000180085
brown	GOTERM_MF_ALL	GO:0016772~transferase activity, transferring phosphorus-containing groups	148	1.08572e-07	0.00018595
brown	GOTERM_BP_ALL	GO:0009914~hormone transport	58	1.09078e-07	0.000217279
brown	GOTERM_CC_ALL	GO:0043204~perikaryon	29	1.16564e-07	0.000182939
brown	KEGG_PATHWAY	hsa04925:Aldosterone synthesis and secretion	26	1.26866e-07	0.000167468
brown	KEGG_PATHWAY	hsa04750:Inflammatory mediator regulation of TRP channels	29	1.40473e-07	0.00018543
brown	GOTERM_BP_ALL	GO:0006914~autophagy	72	1.45226e-07	0.000289286
brown	GOTERM_BP_ALL	GO:0007215~glutamate receptor signaling pathway	23	1.54501e-07	0.000307761
brown	GOTERM_BP_ALL	GO:0030073~insulin secretion	36	1.55231e-07	0.000309215
brown	GOTERM_BP_ALL	GO:0044711~single-organism biosynthetic process	177	1.58147e-07	0.000315022
brown	GOTERM_MF_ALL	GO:0000149~SNARE binding	32	1.87975e-07	0.000321942
brown	GOTERM_CC_ALL	GO:0008328~ionotropic glutamate receptor complex	18	1.93131e-07	0.000303105
brown	GOTERM_CC_ALL	GO:0098878~neurotransmitter receptor complex	18	1.93131e-07	0.000303105
brown	GOTERM_BP_ALL	GO:0090276~regulation of peptide hormone secretion	43	2.41469e-07	0.000480997
brown	GOTERM_MF_ALL	GO:0019905~syntaxin binding	26	2.56142e-07	0.00043869
brown	GOTERM_MF_ALL	GO:0036094~small molecule binding	301	2.74716e-07	0.000470502
brown	GOTERM_MF_ALL	GO:0032550~purine ribonucleoside binding	228	2.75999e-07	0.000472699
brown	GOTERM_MF_ALL	GO:0035639~purine ribonucleoside triphosphate binding	227	2.80592e-07	0.000480566
brown	GOTERM_BP_ALL	GO:0046883~regulation of hormone secretion	50	2.81196e-07	0.000560131
brown	GOTERM_MF_ALL	GO:0001883~purine nucleoside binding	228	2.94493e-07	0.000504373
brown	GOTERM_MF_ALL	GO:0032549~ribonucleoside binding	228	2.94493e-07	0.000504373
brown	GOTERM_BP_ALL	GO:0007009~plasma membrane organization	53	3.00803e-07	0.000599189
brown	GOTERM_BP_ALL	GO:0060341~regulation of cellular localization	120	3.10131e-07	0.000617768
brown	KEGG_PATHWAY	hsa04727:GABAergic synapse	26	3.58225e-07	0.000472869
brown	GOTERM_BP_ALL	GO:0065009~regulation of molecular function	332	3.65718e-07	0.000728496
brown	KEGG_PATHWAY	hsa04724:Glutamatergic synapse	31	3.69684e-07	0.000487996
brown	GOTERM_MF_ALL	GO:0001882~nucleoside binding	228	3.90406e-07	0.000668641
brown	KEGG_PATHWAY	hsa04912:GnRH signaling pathway	27	3.93536e-07	0.000519481
brown	GOTERM_BP_ALL	GO:0002791~regulation of peptide secretion	43	4.84882e-07	0.000965863
brown	GOTERM_BP_ALL	GO:0072659~protein localization to plasma membrane	43	4.84882e-07	0.000965863
brown	GOTERM_BP_ALL	GO:0051640~organelle localization	79	5.14499e-07	0.00102486
brown	GOTERM_MF_ALL	GO:0044325~ion channel binding	29	5.22349e-07	0.000894617
brown	KEGG_PATHWAY	hsa04728:Dopaminergic synapse	33	5.3571e-07	0.000707155
brown	GOTERM_BP_ALL	GO:0050805~negative regulation of synaptic transmission	20	5.51698e-07	0.00109896
brown	GOTERM_MF_ALL	GO:0004674~protein serine/threonine kinase activity	74	5.53231e-07	0.000947508
brown	GOTERM_BP_ALL	GO:0043547~positive regulation of GTPase activity	96	5.70518e-07	0.00113645
brown	GOTERM_CC_ALL	GO:0005789~endoplasmic reticulum membrane	136	5.99322e-07	0.000940589
brown	GOTERM_CC_ALL	GO:0005783~endoplasmic reticulum	206	6.03112e-07	0.000946537
brown	GOTERM_BP_ALL	GO:0051345~positive regulation of hydrolase activity	128	6.15195e-07	0.00122544
brown	GOTERM_BP_ALL	GO:0090087~regulation of peptide transport	43	6.35335e-07	0.00126556
brown	GOTERM_BP_ALL	GO:0010817~regulation of hormone levels	77	6.36283e-07	0.00126745
brown	GOTERM_BP_ALL	GO:0072512~trivalent inorganic cation transport	16	6.48826e-07	0.00129243
brown	GOTERM_BP_ALL	GO:0015682~ferric iron transport	16	6.48826e-07	0.00129243
brown	KEGG_PATHWAY	hsa04725:Cholinergic synapse	30	6.82746e-07	0.000901247
brown	GOTERM_MF_ALL	GO:0019901~protein kinase binding	83	6.89287e-07	0.00118053
brown	GOTERM_BP_ALL	GO:1903305~regulation of regulated secretory pathway	30	7.00976e-07	0.00139631
brown	GOTERM_CC_ALL	GO:0042175~nuclear outer membrane-endoplasmic reticulum membrane network	138	7.26086e-07	0.00113953
brown	KEGG_PATHWAY	hsa05031:Amphetamine addiction	22	7.37104e-07	0.000973001
brown	GOTERM_BP_ALL	GO:1902580~single-organism cellular localization	148	7.43169e-07	0.00148036
brown	GOTERM_BP_ALL	GO:0071417~cellular response to organonitrogen compound	77	7.55791e-07	0.0015055
brown	GOTERM_MF_ALL	GO:0000166~nucleotide binding	280	7.62884e-07	0.00130657
brown	GOTERM_BP_ALL	GO:1901700~response to oxygen-containing compound	187	7.64556e-07	0.00152296
brown	GOTERM_BP_ALL	GO:0043087~regulation of GTPase activity	102	8.1372e-07	0.00162089
brown	GOTERM_MF_ALL	GO:1901265~nucleoside phosphate binding	280	8.15826e-07	0.00139725
brown	GOTERM_MF_ALL	GO:0097367~carbohydrate derivative binding	265	8.19252e-07	0.00140311
brown	GOTERM_BP_ALL	GO:0008016~regulation of heart contraction	46	8.23618e-07	0.00164061
brown	GOTERM_BP_ALL	GO:1990778~protein localization to cell periphery	45	8.65425e-07	0.00172388
brown	GOTERM_BP_ALL	GO:0033572~transferrin transport	15	8.73652e-07	0.00174027
brown	GOTERM_BP_ALL	GO:0016358~dendrite development	40	9.05228e-07	0.00180317
brown	GOTERM_MF_ALL	GO:0019900~kinase binding	90	9.31259e-07	0.00159494
brown	GOTERM_CC_ALL	GO:0005739~mitochondrion	209	9.90386e-07	0.00155433
brown	GOTERM_BP_ALL	GO:0008015~blood circulation	80	1.03006e-06	0.00205182
brown	GOTERM_BP_ALL	GO:0061337~cardiac conduction	26	1.13246e-06	0.0022558
brown	GOTERM_CC_ALL	GO:0044431~Golgi apparatus part	125	1.1351e-06	0.00178144
brown	KEGG_PATHWAY	hsa05110:Vibrio cholerae infection	19	1.14429e-06	0.0015105
brown	GOTERM_MF_ALL	GO:0005251~delayed rectifier potassium channel activity	15	1.17284e-06	0.0020087
brown	GOTERM_MF_ALL	GO:0008092~cytoskeletal protein binding	118	1.19535e-06	0.00204724
brown	GOTERM_BP_ALL	GO:0044802~single-organism membrane organization	121	1.25155e-06	0.00249302
brown	GOTERM_BP_ALL	GO:0060047~heart contraction	47	1.42306e-06	0.00283465
brown	GOTERM_BP_ALL	GO:0003013~circulatory system process	80	1.42856e-06	0.0028456
brown	GOTERM_BP_ALL	GO:0016241~regulation of macroautophagy	30	1.44594e-06	0.00288023
brown	GOTERM_MF_ALL	GO:0005515~protein binding	1053	1.49713e-06	0.00256409
brown	GOTERM_CC_ALL	GO:0044440~endosomal part	71	1.53888e-06	0.00241513
brown	GOTERM_MF_ALL	GO:0005524~ATP binding	187	1.56561e-06	0.00268137
brown	GOTERM_MF_ALL	GO:0005516~calmodulin binding	39	1.69205e-06	0.00289791
brown	GOTERM_BP_ALL	GO:0031344~regulation of cell projection organization	87	1.72046e-06	0.00342704
brown	GOTERM_BP_ALL	GO:0090407~organophosphate biosynthetic process	87	1.72046e-06	0.00342704
brown	KEGG_PATHWAY	hsa04970:Salivary secretion	25	1.75743e-06	0.00231985
brown	GOTERM_BP_ALL	GO:2001257~regulation of cation channel activity	25	1.79962e-06	0.00358473
brown	GOTERM_BP_ALL	GO:0034613~cellular protein localization	199	1.80175e-06	0.00358897
brown	GOTERM_BP_ALL	GO:0001508~action potential	31	1.81613e-06	0.0036176
brown	KEGG_PATHWAY	hsa04070:Phosphatidylinositol signaling system	27	1.88196e-06	0.00248422
brown	GOTERM_CC_ALL	GO:0032281~AMPA glutamate receptor complex	13	1.95264e-06	0.00306448
brown	GOTERM_BP_ALL	GO:0003015~heart process	47	2.01663e-06	0.00401698
brown	GOTERM_BP_ALL	GO:0019932~second-messenger-mediated signaling	45	2.04021e-06	0.00406396
brown	GOTERM_MF_ALL	GO:0005088~Ras guanyl-nucleotide exchange factor activity	44	2.16657e-06	0.00371059
brown	GOTERM_BP_ALL	GO:0036465~synaptic vesicle recycling	13	2.22609e-06	0.0044342
brown	GOTERM_BP_ALL	GO:0060079~excitatory postsynaptic potential	18	2.30526e-06	0.0045919
brown	GOTERM_BP_ALL	GO:0006629~lipid metabolic process	170	2.37277e-06	0.00472637
brown	GOTERM_CC_ALL	GO:0000139~Golgi membrane	100	2.65887e-06	0.00417282
brown	GOTERM_MF_ALL	GO:0005085~guanyl-nucleotide exchange factor activity	54	2.76782e-06	0.00474031
brown	GOTERM_CC_ALL	GO:0010008~endosome membrane	66	2.91719e-06	0.00457822
brown	GOTERM_MF_ALL	GO:0008289~lipid binding	95	3.08509e-06	0.00528366
brown	GOTERM_BP_ALL	GO:0007033~vacuole organization	42	3.08838e-06	0.00615178
brown	GOTERM_BP_ALL	GO:0010976~positive regulation of neuron projection development	44	3.09517e-06	0.00616529
brown	GOTERM_BP_ALL	GO:0070727~cellular macromolecule localization	199	3.17783e-06	0.00632993
brown	KEGG_PATHWAY	hsa04022:cGMP-PKG signaling pathway	36	3.36567e-06	0.00444272
brown	GOTERM_BP_ALL	GO:0048667~cell morphogenesis involved in neuron differentiation	77	3.42271e-06	0.0068177
brown	GOTERM_BP_ALL	GO:0045851~pH reduction	17	3.50175e-06	0.00697513
brown	GOTERM_MF_ALL	GO:0072509~divalent inorganic cation transmembrane transporter activity	36	3.70225e-06	0.00634061
brown	GOTERM_BP_ALL	GO:0008306~associative learning	21	3.79338e-06	0.00755602
brown	GOTERM_BP_ALL	GO:0007613~memory	25	4.01889e-06	0.00800519
brown	GOTERM_BP_ALL	GO:0071705~nitrogen compound transport	103	4.29685e-06	0.00855883
brown	GOTERM_BP_ALL	GO:2000300~regulation of synaptic vesicle exocytosis	12	4.34515e-06	0.00865503
brown	KEGG_PATHWAY	hsa04142:Lysosome	30	4.56222e-06	0.00602214
brown	KEGG_PATHWAY	hsa04971:Gastric acid secretion	22	4.58715e-06	0.00605504
brown	GOTERM_BP_ALL	GO:0016310~phosphorylation	261	4.64548e-06	0.00925323
cyan	GOTERM_BP_ALL	GO:0051603~proteolysis involved in cellular protein catabolic process	35	2.01048e-11	3.67515e-08
cyan	GOTERM_BP_ALL	GO:0006511~ubiquitin-dependent protein catabolic process	32	6.70906e-11	1.22641e-07
cyan	GOTERM_BP_ALL	GO:0044257~cellular protein catabolic process	35	7.25366e-11	1.32597e-07
cyan	GOTERM_BP_ALL	GO:0019941~modification-dependent protein catabolic process	32	9.53203e-11	1.74245e-07
cyan	GOTERM_BP_ALL	GO:0043632~modification-dependent macromolecule catabolic process	32	1.32745e-10	2.42658e-07
cyan	GOTERM_MF_ALL	GO:0019787~ubiquitin-like protein transferase activity	26	1.36574e-09	2.03834e-06
cyan	GOTERM_BP_ALL	GO:0030163~protein catabolic process	35	5.0117e-09	9.16137e-06
cyan	GOTERM_CC_ALL	GO:0005737~cytoplasm	179	5.458e-08	7.87511e-05
cyan	GOTERM_MF_ALL	GO:0004842~ubiquitin-protein transferase activity	23	5.99371e-08	8.94545e-05
cyan	GOTERM_BP_ALL	GO:0070647~protein modification by small protein conjugation or removal	38	6.0435e-08	0.000110475
cyan	KEGG_PATHWAY	hsa04120:Ubiquitin mediated proteolysis	13	7.97705e-08	9.44712e-05
cyan	GOTERM_BP_ALL	GO:0044265~cellular macromolecule catabolic process	36	1.44133e-07	0.000263475
cyan	GOTERM_MF_ALL	GO:0016874~ligase activity	22	1.76119e-07	0.000262853
cyan	GOTERM_MF_ALL	GO:0060589~nucleoside-triphosphatase regulator activity	20	2.19612e-07	0.000327764
cyan	GOTERM_BP_ALL	GO:0043161~proteasome-mediated ubiquitin-dependent protein catabolic process	21	2.24811e-07	0.000410953
cyan	GOTERM_BP_ALL	GO:0036211~protein modification process	87	2.57744e-07	0.000471154
cyan	GOTERM_BP_ALL	GO:0006464~cellular protein modification process	87	2.57744e-07	0.000471154
cyan	GOTERM_BP_ALL	GO:0048193~Golgi vesicle transport	19	4.06984e-07	0.000743964
cyan	GOTERM_MF_ALL	GO:0061659~ubiquitin-like protein ligase activity	15	6.94471e-07	0.00103648
cyan	GOTERM_BP_ALL	GO:0010498~proteasomal protein catabolic process	21	7.00342e-07	0.00128022
cyan	GOTERM_CC_ALL	GO:0044424~intracellular part	209	9.63128e-07	0.00138965
cyan	GOTERM_BP_ALL	GO:0043412~macromolecule modification	89	1.04505e-06	0.00191033
cyan	GOTERM_BP_ALL	GO:0006996~organelle organization	84	1.07035e-06	0.00195657
cyan	GOTERM_MF_ALL	GO:0030695~GTPase regulator activity	18	1.12125e-06	0.00167342
cyan	GOTERM_BP_ALL	GO:0032446~protein modification by small protein conjugation	32	1.39601e-06	0.00255186
cyan	GOTERM_BP_ALL	GO:0043547~positive regulation of GTPase activity	26	1.95211e-06	0.00356839
cyan	GOTERM_MF_ALL	GO:0016740~transferase activity	61	2.08455e-06	0.00311109
cyan	GOTERM_BP_ALL	GO:0043087~regulation of GTPase activity	27	2.84844e-06	0.00520682
cyan	GOTERM_CC_ALL	GO:0005622~intracellular	211	3.92047e-06	0.00565652
cyan	GOTERM_CC_ALL	GO:0005829~cytosol	73	5.69207e-06	0.00821252
cyan	GOTERM_MF_ALL	GO:0005096~GTPase activator activity	16	6.18621e-06	0.00923237
cyan	GOTERM_CC_ALL	GO:0044444~cytoplasmic part	139	6.25718e-06	0.00902783
cyan	GOTERM_CC_ALL	GO:0005768~endosome	28	6.381e-06	0.00920647
cyan	GOTERM_MF_ALL	GO:0051020~GTPase binding	17	6.45519e-06	0.00963377
darkgreen	GOTERM_CC_ALL	GO:0044444~cytoplasmic part	47	3.49642e-07	0.000467464
darkgrey	GOTERM_BP_ALL	GO:0007156~homophilic cell adhesion via plasma membrane adhesion molecules	18	2.67605e-22	4.53412e-19
darkgrey	GOTERM_BP_ALL	GO:0098742~cell-cell adhesion via plasma-membrane adhesion molecules	19	3.75269e-21	6.35831e-18
darkgrey	GOTERM_MF_ALL	GO:0005509~calcium ion binding	22	3.77062e-16	4.32987e-13
darkgrey	GOTERM_BP_ALL	GO:0007155~cell adhesion	27	4.10596e-13	6.95632e-10
darkgrey	GOTERM_CC_ALL	GO:0005886~plasma membrane	41	4.15797e-13	5.29266e-10
darkgrey	GOTERM_BP_ALL	GO:0022610~biological adhesion	27	4.45847e-13	7.5544e-10
darkgrey	GOTERM_CC_ALL	GO:0071944~cell periphery	41	9.12686e-13	1.16183e-09
darkgrey	GOTERM_BP_ALL	GO:0098609~cell-cell adhesion	22	9.19322e-12	1.55764e-08
darkgrey	GOTERM_CC_ALL	GO:0031224~intrinsic component of membrane	41	8.40844e-11	1.07034e-07
darkgrey	GOTERM_CC_ALL	GO:0016020~membrane	49	3.27337e-10	4.1668e-07
darkgrey	GOTERM_CC_ALL	GO:0044425~membrane part	43	6.47327e-10	8.24009e-07
darkgrey	GOTERM_CC_ALL	GO:0016021~integral component of membrane	38	9.67032e-09	1.23097e-05
darkred	GOTERM_BP_ALL	GO:0007187~G-protein coupled receptor signaling pathway, coupled to cyclic nucleotide second messenger	12	4.16576e-10	7.24425e-07
darkred	GOTERM_BP_ALL	GO:0007610~behavior	16	7.18658e-09	1.24975e-05
darkred	GOTERM_BP_ALL	GO:0044708~single-organism behavior	14	7.8186e-09	1.35965e-05
darkred	GOTERM_CC_ALL	GO:0097458~neuron part	23	7.8782e-09	1.01553e-05
darkred	GOTERM_BP_ALL	GO:0099536~synaptic signaling	16	2.1201e-08	3.68684e-05
darkred	GOTERM_BP_ALL	GO:0099537~trans-synaptic signaling	16	2.1201e-08	3.68684e-05
darkred	GOTERM_BP_ALL	GO:0098916~anterograde trans-synaptic signaling	16	2.1201e-08	3.68684e-05
darkred	GOTERM_BP_ALL	GO:0007268~chemical synaptic transmission	16	2.1201e-08	3.68684e-05
darkred	GOTERM_BP_ALL	GO:0007186~G-protein coupled receptor signaling pathway	22	2.25718e-08	3.92523e-05
darkred	GOTERM_BP_ALL	GO:0007188~adenylate cyclase-modulating G-protein coupled receptor signaling pathway	10	2.96594e-08	5.15776e-05
darkred	GOTERM_BP_ALL	GO:0003008~system process	27	5.36941e-08	9.3374e-05
darkred	GOTERM_CC_ALL	GO:0005886~plasma membrane	44	6.88406e-08	8.87381e-05
darkred	GOTERM_BP_ALL	GO:0009187~cyclic nucleotide metabolic process	10	9.02337e-08	0.000156916
darkred	GOTERM_CC_ALL	GO:0071944~cell periphery	44	1.37604e-07	0.000177377
darkred	GOTERM_BP_ALL	GO:0044700~single organism signaling	48	2.78131e-07	0.000483668
darkred	GOTERM_CC_ALL	GO:0036477~somatodendritic compartment	15	3.68909e-07	0.000475537
darkred	GOTERM_BP_ALL	GO:0007212~dopamine receptor signaling pathway	6	3.71252e-07	0.000645606
darkred	GOTERM_BP_ALL	GO:0023052~signaling	48	3.71897e-07	0.000646727
darkred	GOTERM_BP_ALL	GO:0007154~cell communication	48	4.03482e-07	0.000701652
darkred	GOTERM_BP_ALL	GO:0007165~signal transduction	45	1.05345e-06	0.00183194
darkred	GOTERM_BP_ALL	GO:0007626~locomotory behavior	9	1.30032e-06	0.00226123
darkred	GOTERM_BP_ALL	GO:0031279~regulation of cyclase activity	7	1.42352e-06	0.00247548
darkred	GOTERM_BP_ALL	GO:0007612~learning	8	1.46008e-06	0.00253905
darkred	GOTERM_BP_ALL	GO:0051339~regulation of lyase activity	7	1.63293e-06	0.00283963
darkred	GOTERM_CC_ALL	GO:0044459~plasma membrane part	28	2.10046e-06	0.00270753
darkred	GOTERM_BP_ALL	GO:0046058~cAMP metabolic process	8	2.14718e-06	0.00373388
darkred	GOTERM_CC_ALL	GO:0016020~membrane	59	2.26848e-06	0.00292412
darkred	GOTERM_BP_ALL	GO:0007267~cell-cell signaling	21	2.27626e-06	0.00395834
darkred	GOTERM_BP_ALL	GO:0007189~adenylate cyclase-activating G-protein coupled receptor signaling pathway	7	2.41697e-06	0.00420302
darkred	GOTERM_BP_ALL	GO:0052652~cyclic purine nucleotide metabolic process	8	2.46634e-06	0.00428887
darkred	GOTERM_BP_ALL	GO:0009190~cyclic nucleotide biosynthetic process	8	2.82422e-06	0.0049112
darkred	GOTERM_BP_ALL	GO:0051716~cellular response to stimulus	49	3.40826e-06	0.0059268
darkred	GOTERM_BP_ALL	GO:0007611~learning or memory	9	3.59099e-06	0.00624455
darkred	GOTERM_BP_ALL	GO:0050877~neurological system process	19	3.72952e-06	0.00648544
darkred	GOTERM_BP_ALL	GO:0050905~neuromuscular process	7	4.14596e-06	0.00720958
darkred	GOTERM_BP_ALL	GO:0051349~positive regulation of lyase activity	6	5.40464e-06	0.00939825
darkred	GOTERM_BP_ALL	GO:0031281~positive regulation of cyclase activity	6	5.40464e-06	0.00939825
darkred	GOTERM_CC_ALL	GO:0043005~neuron projection	16	6.33001e-06	0.00815932
green	GOTERM_BP_ALL	GO:0030198~extracellular matrix organization	81	2.62514e-43	5.11297e-40
green	GOTERM_BP_ALL	GO:0043062~extracellular structure organization	81	3.33808e-43	6.50154e-40
green	GOTERM_CC_ALL	GO:0031012~extracellular matrix	95	2.87487e-40	4.28977e-37
green	GOTERM_CC_ALL	GO:0044421~extracellular region part	278	7.36502e-38	1.09898e-34
green	GOTERM_BP_ALL	GO:0001944~vasculature development	100	8.28607e-38	1.61387e-34
green	GOTERM_BP_ALL	GO:0001568~blood vessel development	96	7.5127e-37	1.46324e-33
green	GOTERM_BP_ALL	GO:0072358~cardiovascular system development	122	9.60342e-36	1.87045e-32
green	GOTERM_BP_ALL	GO:0072359~circulatory system development	122	9.60342e-36	1.87045e-32
green	GOTERM_CC_ALL	GO:0005578~proteinaceous extracellular matrix	73	2.70731e-34	4.03975e-31
green	GOTERM_BP_ALL	GO:0001525~angiogenesis	77	9.39226e-33	1.82932e-29
green	GOTERM_BP_ALL	GO:0048514~blood vessel morphogenesis	83	3.51207e-32	6.84042e-29
green	GOTERM_CC_ALL	GO:0005576~extracellular region	296	1.4147e-31	2.11096e-28
green	GOTERM_BP_ALL	GO:0022610~biological adhesion	159	3.98515e-30	7.76185e-27
green	GOTERM_BP_ALL	GO:0007155~cell adhesion	157	2.92118e-29	5.68955e-26
green	GOTERM_BP_ALL	GO:0040011~locomotion	147	5.34174e-29	1.04041e-25
green	GOTERM_BP_ALL	GO:0044707~single-multicellular organism process	348	6.78654e-29	1.32181e-25
green	GOTERM_BP_ALL	GO:0051674~localization of cell	134	3.0536e-28	5.94747e-25
green	GOTERM_BP_ALL	GO:0048870~cell motility	134	3.0536e-28	5.94747e-25
green	GOTERM_BP_ALL	GO:0016477~cell migration	123	5.54476e-27	1.07995e-23
green	GOTERM_BP_ALL	GO:0009653~anatomical structure morphogenesis	200	8.58211e-27	1.67153e-23
green	GOTERM_CC_ALL	GO:0044420~extracellular matrix component	40	2.89455e-26	4.31915e-23
green	GOTERM_BP_ALL	GO:0048856~anatomical structure development	319	7.66088e-25	1.4921e-21
green	GOTERM_CC_ALL	GO:0031982~vesicle	242	1.15063e-24	1.71692e-21
green	GOTERM_BP_ALL	GO:0006950~response to stress	243	1.51898e-24	2.9585e-21
green	GOTERM_BP_ALL	GO:0032502~developmental process	324	2.29439e-24	4.46876e-21
green	GOTERM_CC_ALL	GO:0031988~membrane-bounded vesicle	235	2.32102e-24	3.46334e-21
green	GOTERM_BP_ALL	GO:0006928~movement of cell or subcellular component	152	3.00184e-24	5.84665e-21
green	GOTERM_BP_ALL	GO:0007275~multicellular organism development	293	3.92983e-24	7.6541e-21
green	GOTERM_BP_ALL	GO:0044767~single-organism developmental process	317	4.44377e-24	8.6551e-21
green	GOTERM_CC_ALL	GO:0005615~extracellular space	130	4.92185e-24	7.34421e-21
green	GOTERM_BP_ALL	GO:0048731~system development	268	6.24346e-24	1.21603e-20
green	GOTERM_BP_ALL	GO:0009888~tissue development	149	8.1591e-24	1.58914e-20
green	GOTERM_BP_ALL	GO:0009611~response to wounding	81	1.85368e-22	3.6104e-19
green	GOTERM_BP_ALL	GO:0050896~response to stimulus	418	2.27173e-22	4.42462e-19
green	GOTERM_BP_ALL	GO:0048513~animal organ development	211	1.05837e-21	2.06138e-18
green	GOTERM_CC_ALL	GO:1903561~extracellular vesicle	193	1.11118e-21	1.65805e-18
green	GOTERM_CC_ALL	GO:0043230~extracellular organelle	193	1.15772e-21	1.72751e-18
green	GOTERM_CC_ALL	GO:0070062~extracellular exosome	192	1.53407e-21	2.28908e-18
green	GOTERM_CC_ALL	GO:0030055~cell-substrate junction	60	2.73576e-21	4.0822e-18
green	GOTERM_BP_ALL	GO:0070848~response to growth factor	78	3.04853e-21	5.93759e-18
green	GOTERM_BP_ALL	GO:0048646~anatomical structure formation involved in morphogenesis	110	3.88212e-21	7.56118e-18
green	GOTERM_CC_ALL	GO:0005925~focal adhesion	59	5.16306e-21	7.70413e-18
green	GOTERM_CC_ALL	GO:0005924~cell-substrate adherens junction	59	7.54997e-21	1.12658e-17
green	GOTERM_BP_ALL	GO:0051270~regulation of cellular component movement	88	1.20637e-20	2.34964e-17
green	GOTERM_BP_ALL	GO:0030334~regulation of cell migration	80	2.15652e-20	4.20024e-17
green	GOTERM_BP_ALL	GO:0007166~cell surface receptor signaling pathway	186	2.78585e-20	5.42597e-17
green	GOTERM_BP_ALL	GO:0031589~cell-substrate adhesion	52	3.028e-20	5.89761e-17
green	GOTERM_BP_ALL	GO:2000145~regulation of cell motility	83	3.33246e-20	6.49061e-17
green	GOTERM_BP_ALL	GO:0051239~regulation of multicellular organismal process	185	4.44345e-20	8.65448e-17
green	GOTERM_BP_ALL	GO:0071363~cellular response to growth factor stimulus	74	8.34968e-20	1.62626e-16
green	GOTERM_BP_ALL	GO:0032501~multicellular organismal process	363	1.60912e-19	3.13408e-16
green	GOTERM_BP_ALL	GO:0042127~regulation of cell proliferation	128	3.302e-19	6.43127e-16
green	GOTERM_BP_ALL	GO:0009628~response to abiotic stimulus	99	3.54069e-19	6.89618e-16
green	GOTERM_BP_ALL	GO:0048518~positive regulation of biological process	295	3.99069e-19	7.77264e-16
green	GOTERM_BP_ALL	GO:0010033~response to organic substance	190	4.09289e-19	7.97168e-16
green	GOTERM_BP_ALL	GO:0040012~regulation of locomotion	83	4.60384e-19	8.96685e-16
green	GOTERM_BP_ALL	GO:0048583~regulation of response to stimulus	226	5.66604e-19	1.10357e-15
green	KEGG_PATHWAY	hsa04510:Focal adhesion	45	7.9239e-19	1.01658e-15
green	GOTERM_CC_ALL	GO:0005604~basement membrane	29	8.73027e-19	1.3027e-15
green	GOTERM_MF_ALL	GO:0019838~growth factor binding	33	1.64925e-18	2.64635e-15
green	GOTERM_BP_ALL	GO:0070887~cellular response to chemical stimulus	180	2.10718e-18	4.10413e-15
green	GOTERM_CC_ALL	GO:0005912~adherens junction	75	5.23717e-18	7.81471e-15
green	GOTERM_CC_ALL	GO:0070161~anchoring junction	76	5.61815e-18	8.3832e-15
green	GOTERM_BP_ALL	GO:0009966~regulation of signal transduction	182	8.68299e-18	1.69118e-14
green	GOTERM_BP_ALL	GO:0042060~wound healing	66	8.99466e-18	1.75188e-14
green	GOTERM_BP_ALL	GO:1901700~response to oxygen-containing compound	120	1.04447e-17	2.03431e-14
green	GOTERM_BP_ALL	GO:0071310~cellular response to organic substance	156	1.29136e-17	2.51517e-14
green	GOTERM_BP_ALL	GO:0008283~cell proliferation	140	1.34594e-17	2.62148e-14
green	GOTERM_BP_ALL	GO:0070482~response to oxygen levels	49	1.49882e-17	2.91925e-14
green	GOTERM_BP_ALL	GO:0050793~regulation of developmental process	153	1.5959e-17	3.10832e-14
green	GOTERM_BP_ALL	GO:0030154~cell differentiation	222	2.1161e-17	4.12151e-14
green	GOTERM_BP_ALL	GO:0007167~enzyme linked receptor protein signaling pathway	91	2.20986e-17	4.30413e-14
green	GOTERM_BP_ALL	GO:0002376~immune system process	168	3.77989e-17	7.36205e-14
green	GOTERM_MF_ALL	GO:0005178~integrin binding	29	4.85746e-17	7.79416e-14
green	GOTERM_MF_ALL	GO:0005201~extracellular matrix structural constituent	26	5.52417e-17	8.86395e-14
green	GOTERM_CC_ALL	GO:0009986~cell surface	77	9.46661e-17	1.66533e-13
green	GOTERM_BP_ALL	GO:0045765~regulation of angiogenesis	40	1.468e-16	2.10942e-13
green	GOTERM_BP_ALL	GO:0048584~positive regulation of response to stimulus	146	2.18598e-16	4.32987e-13
green	GOTERM_BP_ALL	GO:0010941~regulation of cell death	119	3.51625e-16	6.43929e-13
green	GOTERM_BP_ALL	GO:0030155~regulation of cell adhesion	70	3.94234e-16	8.65974e-13
green	GOTERM_BP_ALL	GO:0023051~regulation of signaling	193	5.19655e-16	1.07692e-12
green	GOTERM_BP_ALL	GO:0007165~signal transduction	305	6.12086e-16	1.29896e-12
green	GOTERM_BP_ALL	GO:0044699~single-organism process	557	6.13237e-16	1.29896e-12
green	GOTERM_BP_ALL	GO:0010646~regulation of cell communication	190	9.78591e-16	1.94289e-12
green	GOTERM_BP_ALL	GO:1901342~regulation of vasculature development	41	1.02328e-15	1.94289e-12
green	GOTERM_BP_ALL	GO:0036293~response to decreased oxygen levels	45	1.08779e-15	2.16493e-12
green	GOTERM_BP_ALL	GO:0048869~cellular developmental process	232	1.11355e-15	2.16493e-12
green	GOTERM_BP_ALL	GO:0032963~collagen metabolic process	28	1.47736e-15	2.80886e-12
green	GOTERM_BP_ALL	GO:0001666~response to hypoxia	44	1.71609e-15	3.24185e-12
green	GOTERM_BP_ALL	GO:0051716~cellular response to stimulus	347	1.7561e-15	3.4639e-12
green	GOTERM_BP_ALL	GO:0043067~regulation of programmed cell death	112	2.60934e-15	5.18474e-12
green	GOTERM_BP_ALL	GO:0042981~regulation of apoptotic process	111	3.51414e-15	6.91669e-12
green	GOTERM_BP_ALL	GO:0044259~multicellular organismal macromolecule metabolic process	28	5.03838e-15	9.72555e-12
green	GOTERM_BP_ALL	GO:0050900~leukocyte migration	50	5.87064e-15	1.14575e-11
green	GOTERM_BP_ALL	GO:0071560~cellular response to transforming growth factor beta stimulus	37	9.11235e-15	1.77303e-11
green	GOTERM_MF_ALL	GO:0005102~receptor binding	113	9.66226e-15	1.54987e-11
green	GOTERM_BP_ALL	GO:2000026~regulation of multicellular organismal development	126	1.19778e-14	2.33591e-11
green	GOTERM_BP_ALL	GO:0071559~response to transforming growth factor beta	37	1.22834e-14	2.4003e-11
green	GOTERM_BP_ALL	GO:0007154~cell communication	319	1.7527e-14	3.41616e-11
green	GOTERM_BP_ALL	GO:0008219~cell death	137	1.99084e-14	3.87024e-11
green	GOTERM_BP_ALL	GO:0044700~single organism signaling	316	2.27705e-14	4.43312e-11
green	GOTERM_BP_ALL	GO:0009887~organ morphogenesis	87	2.61561e-14	5.1037e-11
green	GOTERM_BP_ALL	GO:0044236~multicellular organism metabolic process	29	3.06396e-14	5.96856e-11
green	KEGG_PATHWAY	hsa04512:ECM-receptor interaction	26	3.16315e-14	4.05898e-11
green	GOTERM_BP_ALL	GO:0022603~regulation of anatomical structure morphogenesis	90	3.45e-14	6.72462e-11
green	GOTERM_BP_ALL	GO:0044763~single-organism cellular process	521	3.70795e-14	7.222e-11
green	GOTERM_BP_ALL	GO:0023052~signaling	317	4.34818e-14	8.47655e-11
green	GOTERM_BP_ALL	GO:0090130~tissue migration	38	5.07262e-14	9.8821e-11
green	GOTERM_CC_ALL	GO:0005581~collagen trimer	25	7.64101e-14	1.13975e-10
green	GOTERM_BP_ALL	GO:0042221~response to chemical	231	7.99139e-14	1.55687e-10
green	GOTERM_BP_ALL	GO:0051179~localization	301	8.87208e-14	1.72773e-10
green	GOTERM_CC_ALL	GO:0044459~plasma membrane part	163	8.88383e-14	1.32527e-10
green	GOTERM_BP_ALL	GO:0012501~programmed cell death	130	9.43663e-14	1.83797e-10
green	GOTERM_BP_ALL	GO:0048522~positive regulation of cellular process	256	1.21978e-13	2.37643e-10
green	GOTERM_BP_ALL	GO:0030335~positive regulation of cell migration	49	1.64536e-13	3.20466e-10
green	GOTERM_BP_ALL	GO:0043542~endothelial cell migration	30	2.21014e-13	4.30533e-10
green	GOTERM_BP_ALL	GO:0048519~negative regulation of biological process	250	2.51785e-13	4.9043e-10
green	GOTERM_BP_ALL	GO:0035556~intracellular signal transduction	166	3.11747e-13	6.07192e-10
green	GOTERM_BP_ALL	GO:0009605~response to external stimulus	139	3.36587e-13	6.55631e-10
green	GOTERM_BP_ALL	GO:0010631~epithelial cell migration	36	4.13729e-13	8.05911e-10
green	GOTERM_BP_ALL	GO:0051272~positive regulation of cellular component movement	50	4.31224e-13	8.39862e-10
green	GOTERM_MF_ALL	GO:0005518~collagen binding	20	5.77142e-13	9.25993e-10
green	GOTERM_BP_ALL	GO:2000147~positive regulation of cell motility	49	6.08623e-13	1.18541e-09
green	GOTERM_BP_ALL	GO:0090132~epithelium migration	36	6.12475e-13	1.19298e-09
green	GOTERM_BP_ALL	GO:0048523~negative regulation of cellular process	235	8.03829e-13	1.56556e-09
green	KEGG_PATHWAY	hsa04151:PI3K-Akt signaling pathway	49	1.09236e-12	1.4014e-09
green	GOTERM_BP_ALL	GO:0001667~ameboidal-type cell migration	42	1.83652e-12	3.57699e-09
green	GOTERM_BP_ALL	GO:0040017~positive regulation of locomotion	49	1.92428e-12	3.74782e-09
green	GOTERM_BP_ALL	GO:0023056~positive regulation of signaling	112	2.2786e-12	4.43805e-09
green	GOTERM_BP_ALL	GO:0045595~regulation of cell differentiation	111	2.40981e-12	4.69365e-09
green	GOTERM_BP_ALL	GO:1902531~regulation of intracellular signal transduction	119	3.15473e-12	6.14439e-09
green	GOTERM_BP_ALL	GO:0007179~transforming growth factor beta receptor signaling pathway	29	3.19739e-12	6.22763e-09
green	GOTERM_MF_ALL	GO:0050839~cell adhesion molecule binding	51	3.62437e-12	5.81549e-09
green	GOTERM_BP_ALL	GO:0007507~heart development	54	4.90029e-12	9.54428e-09
green	GOTERM_BP_ALL	GO:0006915~apoptotic process	120	5.03875e-12	9.81393e-09
green	GOTERM_MF_ALL	GO:0032403~protein complex binding	69	5.7019e-12	9.14909e-09
green	GOTERM_BP_ALL	GO:0009967~positive regulation of signal transduction	104	6.67096e-12	1.2993e-08
green	GOTERM_BP_ALL	GO:0010647~positive regulation of cell communication	110	8.54886e-12	1.66505e-08
green	GOTERM_BP_ALL	GO:0007178~transmembrane receptor protein serine/threonine kinase signaling pathway	41	9.30685e-12	1.81269e-08
green	GOTERM_CC_ALL	GO:0060205~cytoplasmic membrane-bounded vesicle lumen	23	1.01579e-11	1.51572e-08
green	GOTERM_BP_ALL	GO:0006954~inflammatory response	61	1.06643e-11	2.07707e-08
green	GOTERM_CC_ALL	GO:0031410~cytoplasmic vesicle	94	1.13179e-11	1.68882e-08
green	GOTERM_CC_ALL	GO:0031983~vesicle lumen	23	1.24047e-11	1.85099e-08
green	GOTERM_CC_ALL	GO:0097708~intracellular vesicle	94	1.24834e-11	1.86272e-08
green	GOTERM_BP_ALL	GO:0007160~cell-matrix adhesion	31	1.27351e-11	2.48041e-08
green	GOTERM_BP_ALL	GO:0034329~cell junction assembly	31	1.27351e-11	2.48041e-08
green	GOTERM_BP_ALL	GO:0045785~positive regulation of cell adhesion	45	1.42052e-11	2.76673e-08
green	GOTERM_BP_ALL	GO:0001935~endothelial cell proliferation	24	1.56535e-11	3.04881e-08
green	GOTERM_MF_ALL	GO:0005539~glycosaminoglycan binding	32	1.9366e-11	3.10741e-08
green	GOTERM_BP_ALL	GO:0001503~ossification	43	1.98039e-11	3.85717e-08
green	GOTERM_BP_ALL	GO:0033993~response to lipid	73	2.22587e-11	4.33532e-08
green	GOTERM_BP_ALL	GO:0009893~positive regulation of metabolic process	177	2.58419e-11	5.0332e-08
green	GOTERM_CC_ALL	GO:0016023~cytoplasmic, membrane-bounded vesicle	88	2.66602e-11	3.97814e-08
green	GOTERM_MF_ALL	GO:0005515~protein binding	466	2.76426e-11	4.43545e-08
green	GOTERM_BP_ALL	GO:0071495~cellular response to endogenous stimulus	90	2.80149e-11	5.45644e-08
green	GOTERM_CC_ALL	GO:0031093~platelet alpha granule lumen	17	3.45072e-11	5.14903e-08
green	GOTERM_BP_ALL	GO:0048585~negative regulation of response to stimulus	99	3.71609e-11	7.23778e-08
green	GOTERM_BP_ALL	GO:0031325~positive regulation of cellular metabolic process	167	4.0633e-11	7.91404e-08
green	GOTERM_BP_ALL	GO:0001775~cell activation	75	4.44106e-11	8.64983e-08
green	GOTERM_BP_ALL	GO:1902533~positive regulation of intracellular signal transduction	75	5.77955e-11	1.12568e-07
green	GOTERM_BP_ALL	GO:0009719~response to endogenous stimulus	107	7.01378e-11	1.36607e-07
green	GOTERM_BP_ALL	GO:0060429~epithelium development	82	1.05019e-10	2.04545e-07
green	GOTERM_BP_ALL	GO:0010604~positive regulation of macromolecule metabolic process	166	1.24593e-10	2.42669e-07
green	GOTERM_BP_ALL	GO:0032879~regulation of localization	149	1.35326e-10	2.63573e-07
green	GOTERM_BP_ALL	GO:0009790~embryo development	76	1.56111e-10	3.04056e-07
green	GOTERM_BP_ALL	GO:0051240~positive regulation of multicellular organismal process	100	1.95777e-10	3.81313e-07
green	GOTERM_BP_ALL	GO:0014070~response to organic cyclic compound	73	2.38718e-10	4.64949e-07
green	GOTERM_BP_ALL	GO:0098602~single organism cell adhesion	66	2.58908e-10	5.04273e-07
green	GOTERM_BP_ALL	GO:0001932~regulation of protein phosphorylation	93	2.97046e-10	5.78554e-07
green	GOTERM_BP_ALL	GO:0006027~glycosaminoglycan catabolic process	17	3.20231e-10	6.23711e-07
green	GOTERM_MF_ALL	GO:0050840~extracellular matrix binding	16	3.45199e-10	5.53897e-07
green	GOTERM_BP_ALL	GO:0010942~positive regulation of cell death	56	3.51282e-10	6.84189e-07
green	GOTERM_BP_ALL	GO:0001501~skeletal system development	49	3.74992e-10	7.30369e-07
green	GOTERM_BP_ALL	GO:0001570~vasculogenesis	18	4.2461e-10	8.27009e-07
green	GOTERM_BP_ALL	GO:0034330~cell junction organization	33	4.83211e-10	9.41145e-07
green	GOTERM_CC_ALL	GO:0031226~intrinsic component of plasma membrane	109	5.65839e-10	8.44324e-07
green	GOTERM_BP_ALL	GO:0000302~response to reactive oxygen species	30	5.83207e-10	1.13591e-06
green	GOTERM_CC_ALL	GO:0034774~secretory granule lumen	19	7.93342e-10	1.1838e-06
green	GOTERM_CC_ALL	GO:0012505~endomembrane system	201	8.46838e-10	1.26362e-06
green	GOTERM_BP_ALL	GO:0030203~glycosaminoglycan metabolic process	26	8.63926e-10	1.68266e-06
green	GOTERM_BP_ALL	GO:0048729~tissue morphogenesis	56	8.64077e-10	1.68295e-06
green	GOTERM_BP_ALL	GO:0034097~response to cytokine	66	8.79413e-10	1.71282e-06
green	GOTERM_BP_ALL	GO:0030574~collagen catabolic process	17	8.94385e-10	1.74199e-06
green	GOTERM_BP_ALL	GO:0045766~positive regulation of angiogenesis	23	9.5033e-10	1.85095e-06
green	GOTERM_BP_ALL	GO:0045597~positive regulation of cell differentiation	68	9.6714e-10	1.88369e-06
green	GOTERM_BP_ALL	GO:0042325~regulation of phosphorylation	96	1.05068e-09	2.04639e-06
green	GOTERM_BP_ALL	GO:0006952~defense response	102	1.0688e-09	2.0817e-06
green	GOTERM_CC_ALL	GO:0030054~cell junction	93	1.13757e-09	1.69743e-06
green	GOTERM_CC_ALL	GO:0043202~lysosomal lumen	19	1.17809e-09	1.7579e-06
green	GOTERM_BP_ALL	GO:0051241~negative regulation of multicellular organismal process	77	1.20126e-09	2.33968e-06
green	GOTERM_CC_ALL	GO:0030141~secretory granule	39	1.2036e-09	1.79597e-06
green	GOTERM_BP_ALL	GO:0043068~positive regulation of programmed cell death	53	1.33415e-09	2.59852e-06
green	GOTERM_BP_ALL	GO:0002576~platelet degranulation	21	1.38363e-09	2.69488e-06
green	GOTERM_CC_ALL	GO:0044433~cytoplasmic vesicle part	54	1.39145e-09	2.07626e-06
green	GOTERM_BP_ALL	GO:0003013~circulatory system process	49	1.41633e-09	2.75857e-06
green	GOTERM_BP_ALL	GO:0010810~regulation of cell-substrate adhesion	27	1.5198e-09	2.96011e-06
green	GOTERM_BP_ALL	GO:0035295~tube development	53	1.58134e-09	3.07996e-06
green	GOTERM_BP_ALL	GO:0030855~epithelial cell differentiation	52	1.60888e-09	3.13361e-06
green	GOTERM_BP_ALL	GO:1904018~positive regulation of vasculature development	24	1.79076e-09	3.48785e-06
green	GOTERM_CC_ALL	GO:0005886~plasma membrane	249	1.8258e-09	2.72439e-06
green	GOTERM_BP_ALL	GO:0006026~aminoglycan catabolic process	17	1.83345e-09	3.57099e-06
green	GOTERM_BP_ALL	GO:0042327~positive regulation of phosphorylation	72	1.98388e-09	3.86399e-06
green	GOTERM_BP_ALL	GO:0090287~regulation of cellular response to growth factor stimulus	31	2.0025e-09	3.90026e-06
green	GOTERM_BP_ALL	GO:0010632~regulation of epithelial cell migration	26	2.1354e-09	4.1591e-06
green	GOTERM_BP_ALL	GO:0061448~connective tissue development	31	2.21347e-09	4.31116e-06
green	GOTERM_CC_ALL	GO:0071944~cell periphery	253	2.2232e-09	3.31738e-06
green	GOTERM_CC_ALL	GO:0005887~integral component of plasma membrane	104	2.32556e-09	3.47012e-06
green	GOTERM_BP_ALL	GO:0006022~aminoglycan metabolic process	26	2.73961e-09	5.33592e-06
green	GOTERM_BP_ALL	GO:0043065~positive regulation of apoptotic process	52	2.76092e-09	5.37741e-06
green	GOTERM_BP_ALL	GO:0008015~blood circulation	48	3.25977e-09	6.34903e-06
green	GOTERM_BP_ALL	GO:0043069~negative regulation of programmed cell death	66	3.28397e-09	6.39617e-06
green	GOTERM_CC_ALL	GO:0044444~cytoplasmic part	356	3.32812e-09	4.9661e-06
green	GOTERM_BP_ALL	GO:0008284~positive regulation of cell proliferation	67	3.46759e-09	6.7538e-06
green	GOTERM_BP_ALL	GO:0001934~positive regulation of protein phosphorylation	69	4.08009e-09	7.94676e-06
green	GOTERM_BP_ALL	GO:0009612~response to mechanical stimulus	28	4.24241e-09	8.2629e-06
green	GOTERM_BP_ALL	GO:0050673~epithelial cell proliferation	38	4.29473e-09	8.36482e-06
green	GOTERM_BP_ALL	GO:1903510~mucopolysaccharide metabolic process	21	4.38848e-09	8.54741e-06
green	GOTERM_BP_ALL	GO:0008285~negative regulation of cell proliferation	56	4.42318e-09	8.615e-06
green	GOTERM_BP_ALL	GO:0044243~multicellular organism catabolic process	17	4.48901e-09	8.74321e-06
green	GOTERM_BP_ALL	GO:1901701~cellular response to oxygen-containing compound	70	4.51222e-09	8.78841e-06
green	GOTERM_BP_ALL	GO:0043066~negative regulation of apoptotic process	65	4.72178e-09	9.19658e-06
green	GOTERM_BP_ALL	GO:0010594~regulation of endothelial cell migration	21	5.13558e-09	1.00025e-05
green	GOTERM_CC_ALL	GO:0031091~platelet alpha granule	17	5.17664e-09	7.72438e-06
green	GOTERM_BP_ALL	GO:0060548~negative regulation of cell death	69	5.56666e-09	1.08421e-05
green	GOTERM_BP_ALL	GO:0001655~urogenital system development	36	5.84545e-09	1.13851e-05
green	GOTERM_BP_ALL	GO:0043408~regulation of MAPK cascade	57	7.08808e-09	1.38054e-05
green	GOTERM_BP_ALL	GO:0010811~positive regulation of cell-substrate adhesion	20	7.39272e-09	1.43987e-05
green	GOTERM_BP_ALL	GO:0061061~muscle structure development	52	7.42413e-09	1.44599e-05
green	GOTERM_MF_ALL	GO:0044877~macromolecular complex binding	89	7.60599e-09	1.22044e-05
green	GOTERM_BP_ALL	GO:0050878~regulation of body fluid levels	47	7.83882e-09	1.52676e-05
green	GOTERM_BP_ALL	GO:0001704~formation of primary germ layer	21	8.1424e-09	1.58589e-05
green	GOTERM_BP_ALL	GO:0007568~aging	33	9.17544e-09	1.78709e-05
green	GOTERM_BP_ALL	GO:0051246~regulation of protein metabolic process	144	9.37164e-09	1.82531e-05
green	GOTERM_BP_ALL	GO:0006897~endocytosis	56	9.49948e-09	1.85021e-05
green	GOTERM_BP_ALL	GO:0007599~hemostasis	38	9.92495e-09	1.93307e-05
green	GOTERM_BP_ALL	GO:0007169~transmembrane receptor protein tyrosine kinase signaling pathway	55	9.98215e-09	1.94422e-05
green	GOTERM_BP_ALL	GO:0030199~collagen fibril organization	13	1.00585e-08	1.95909e-05
green	GOTERM_BP_ALL	GO:0045937~positive regulation of phosphate metabolic process	76	1.06021e-08	2.06496e-05
green	GOTERM_BP_ALL	GO:0010562~positive regulation of phosphorus metabolic process	76	1.06021e-08	2.06496e-05
green	GOTERM_BP_ALL	GO:0051094~positive regulation of developmental process	78	1.06955e-08	2.08316e-05
green	GOTERM_BP_ALL	GO:0022617~extracellular matrix disassembly	18	1.41721e-08	2.76029e-05
green	GOTERM_BP_ALL	GO:0003158~endothelium development	20	1.62714e-08	3.16917e-05
green	GOTERM_BP_ALL	GO:0044706~multi-multicellular organism process	28	1.83599e-08	3.57594e-05
green	GOTERM_BP_ALL	GO:0043534~blood vessel endothelial cell migration	16	1.88018e-08	3.66202e-05
green	GOTERM_MF_ALL	GO:0048407~platelet-derived growth factor binding	8	2.26164e-08	3.62897e-05
green	GOTERM_BP_ALL	GO:0009968~negative regulation of signal transduction	77	2.34818e-08	4.57354e-05
green	GOTERM_BP_ALL	GO:0019220~regulation of phosphate metabolic process	102	2.35135e-08	4.57971e-05
green	GOTERM_BP_ALL	GO:0002682~regulation of immune system process	91	2.44695e-08	4.7659e-05
green	GOTERM_BP_ALL	GO:0051174~regulation of phosphorus metabolic process	102	2.45831e-08	4.78803e-05
green	GOTERM_BP_ALL	GO:0042476~odontogenesis	20	2.9582e-08	5.76166e-05
green	GOTERM_BP_ALL	GO:0048468~cell development	118	3.01125e-08	5.86499e-05
green	GOTERM_CC_ALL	GO:0005764~lysosome	47	3.1736e-08	4.73552e-05
green	GOTERM_CC_ALL	GO:0000323~lytic vacuole	47	3.1736e-08	4.73552e-05
green	GOTERM_BP_ALL	GO:0050817~coagulation	37	3.20517e-08	6.24268e-05
green	GOTERM_BP_ALL	GO:0007596~blood coagulation	36	3.22379e-08	6.27895e-05
green	GOTERM_BP_ALL	GO:0001837~epithelial to mesenchymal transition	19	3.24412e-08	6.31854e-05
green	GOTERM_CC_ALL	GO:0098589~membrane region	36	3.3664e-08	5.02322e-05
green	GOTERM_BP_ALL	GO:0072593~reactive oxygen species metabolic process	28	3.62655e-08	7.06341e-05
green	GOTERM_CC_ALL	GO:0098644~complex of collagen trimers	10	3.87875e-08	5.78773e-05
green	KEGG_PATHWAY	hsa05146:Amoebiasis	21	3.90806e-08	5.01377e-05
green	GOTERM_BP_ALL	GO:0065007~biological regulation	478	3.92889e-08	7.65227e-05
green	GOTERM_BP_ALL	GO:0010628~positive regulation of gene expression	105	4.01151e-08	7.81319e-05
green	GOTERM_BP_ALL	GO:0072001~renal system development	32	4.22692e-08	8.23273e-05
green	GOTERM_BP_ALL	GO:0023057~negative regulation of signaling	81	4.22725e-08	8.23338e-05
green	GOTERM_CC_ALL	GO:0045121~membrane raft	31	4.32812e-08	6.45826e-05
green	GOTERM_CC_ALL	GO:0098857~membrane microdomain	31	4.69414e-08	7.00442e-05
green	GOTERM_BP_ALL	GO:0048598~embryonic morphogenesis	49	5.25346e-08	0.000102321
green	GOTERM_BP_ALL	GO:0032496~response to lipopolysaccharide	33	5.61201e-08	0.000109305
green	GOTERM_BP_ALL	GO:0051093~negative regulation of developmental process	58	5.74714e-08	0.000111936
green	GOTERM_BP_ALL	GO:0009725~response to hormone	64	5.79596e-08	0.000112887
green	GOTERM_BP_ALL	GO:0031960~response to corticosteroid	23	6.03962e-08	0.000117633
green	GOTERM_BP_ALL	GO:0048568~embryonic organ development	40	6.12393e-08	0.000119275
green	GOTERM_BP_ALL	GO:0018212~peptidyl-tyrosine modification	36	6.17222e-08	0.000120216
green	GOTERM_BP_ALL	GO:0002009~morphogenesis of an epithelium	46	6.31045e-08	0.000122908
green	GOTERM_BP_ALL	GO:1902578~single-organism localization	187	6.43937e-08	0.000125419
green	GOTERM_BP_ALL	GO:0007369~gastrulation	24	6.51135e-08	0.000126821
green	GOTERM_BP_ALL	GO:0048659~smooth muscle cell proliferation	19	6.88529e-08	0.000134104
green	GOTERM_BP_ALL	GO:0016337~single organismal cell-cell adhesion	57	7.17197e-08	0.000139688
green	GOTERM_BP_ALL	GO:0007565~female pregnancy	25	7.49204e-08	0.000145922
green	GOTERM_BP_ALL	GO:0010648~negative regulation of cell communication	80	7.78554e-08	0.000151638
green	GOTERM_BP_ALL	GO:0098609~cell-cell adhesion	79	8.28151e-08	0.000161298
green	GOTERM_BP_ALL	GO:0032268~regulation of cellular protein metabolic process	133	8.60913e-08	0.000167679
green	GOTERM_BP_ALL	GO:0007492~endoderm development	16	8.94947e-08	0.000174308
green	GOTERM_BP_ALL	GO:0001101~response to acid chemical	31	9.7633e-08	0.000190159
green	GOTERM_BP_ALL	GO:0010243~response to organonitrogen compound	60	9.8878e-08	0.000192584
green	GOTERM_BP_ALL	GO:0001936~regulation of endothelial cell proliferation	18	1.02622e-07	0.000199876
green	GOTERM_BP_ALL	GO:0051707~response to other organism	62	1.03974e-07	0.000202509
green	GOTERM_BP_ALL	GO:0043207~response to external biotic stimulus	62	1.03974e-07	0.000202509
green	GOTERM_CC_ALL	GO:0005775~vacuolar lumen	19	1.09956e-07	0.000164072
green	GOTERM_BP_ALL	GO:0044710~single-organism metabolic process	204	1.21573e-07	0.000236787
green	GOTERM_BP_ALL	GO:0048660~regulation of smooth muscle cell proliferation	19	1.21689e-07	0.000237012
green	GOTERM_BP_ALL	GO:0001701~in utero embryonic development	34	1.48373e-07	0.000288983
green	GOTERM_BP_ALL	GO:0080134~regulation of response to stress	84	1.49634e-07	0.00029144
green	GOTERM_CC_ALL	GO:0009897~external side of plasma membrane	28	1.55737e-07	0.000232385
green	GOTERM_BP_ALL	GO:0002237~response to molecule of bacterial origin	33	1.60483e-07	0.00031257
green	GOTERM_BP_ALL	GO:0018108~peptidyl-tyrosine phosphorylation	35	1.6711e-07	0.000325479
green	GOTERM_BP_ALL	GO:0002684~positive regulation of immune system process	68	1.72984e-07	0.00033692
green	GOTERM_CC_ALL	GO:0005788~endoplasmic reticulum lumen	25	1.73513e-07	0.000258909
green	GOTERM_BP_ALL	GO:0045944~positive regulation of transcription from RNA polymerase II promoter	72	1.7549e-07	0.0003418
green	GOTERM_BP_ALL	GO:0045055~regulated exocytosis	31	2.12559e-07	0.000413999
green	GOTERM_BP_ALL	GO:0009617~response to bacterium	46	2.1478e-07	0.000418324
green	GOTERM_BP_ALL	GO:0001558~regulation of cell growth	38	2.15687e-07	0.000420091
green	GOTERM_BP_ALL	GO:0007229~integrin-mediated signaling pathway	18	2.46198e-07	0.000479517
green	GOTERM_CC_ALL	GO:0001725~stress fiber	13	2.68092e-07	0.000400036
green	GOTERM_CC_ALL	GO:0097517~contractile actin filament bundle	13	2.68092e-07	0.000400036
green	GOTERM_BP_ALL	GO:0045446~endothelial cell differentiation	17	2.7792e-07	0.000541301
green	GOTERM_BP_ALL	GO:0003007~heart morphogenesis	27	2.80334e-07	0.000546003
green	GOTERM_BP_ALL	GO:0006468~protein phosphorylation	109	3.08344e-07	0.000600557
green	GOTERM_BP_ALL	GO:0030097~hemopoiesis	56	3.18257e-07	0.000619865
green	GOTERM_BP_ALL	GO:0048534~hematopoietic or lymphoid organ development	58	3.19131e-07	0.000621566
green	GOTERM_MF_ALL	GO:0008201~heparin binding	22	3.23033e-07	0.00051833
green	GOTERM_BP_ALL	GO:0023014~signal transduction by protein phosphorylation	63	3.37212e-07	0.000656782
green	GOTERM_BP_ALL	GO:0001706~endoderm formation	13	3.88275e-07	0.000756238
green	GOTERM_BP_ALL	GO:0000165~MAPK cascade	61	3.89635e-07	0.000758887
green	GOTERM_BP_ALL	GO:0010718~positive regulation of epithelial to mesenchymal transition	11	3.90205e-07	0.000759997
green	GOTERM_BP_ALL	GO:0060485~mesenchyme development	27	3.95779e-07	0.000770852
green	GOTERM_MF_ALL	GO:0008083~growth factor activity	22	3.98951e-07	0.000640145
green	GOTERM_BP_ALL	GO:0043410~positive regulation of MAPK cascade	42	4.31758e-07	0.000840927
green	GOTERM_BP_ALL	GO:0044765~single-organism transport	175	4.42352e-07	0.000861561
green	GOTERM_CC_ALL	GO:0030139~endocytic vesicle	28	4.432e-07	0.000661324
green	GOTERM_BP_ALL	GO:0048545~response to steroid hormone	36	4.52402e-07	0.000881136
green	GOTERM_BP_ALL	GO:0048762~mesenchymal cell differentiation	23	5.05496e-07	0.000984546
green	GOTERM_BP_ALL	GO:0032964~collagen biosynthetic process	11	5.17513e-07	0.00100795
green	GOTERM_BP_ALL	GO:0009891~positive regulation of biosynthetic process	104	5.19702e-07	0.00101221
green	GOTERM_BP_ALL	GO:0045601~regulation of endothelial cell differentiation	10	5.27438e-07	0.00102728
green	GOTERM_BP_ALL	GO:0065008~regulation of biological quality	180	5.36067e-07	0.00104409
green	GOTERM_BP_ALL	GO:0050789~regulation of biological process	452	5.41211e-07	0.00105411
green	GOTERM_BP_ALL	GO:0000904~cell morphogenesis involved in differentiation	56	5.78852e-07	0.00112742
green	GOTERM_BP_ALL	GO:0040007~growth	65	5.89034e-07	0.00114725
green	GOTERM_BP_ALL	GO:0051254~positive regulation of RNA metabolic process	88	6.13046e-07	0.00119402
green	GOTERM_BP_ALL	GO:0009607~response to biotic stimulus	62	6.20349e-07	0.00120824
green	GOTERM_BP_ALL	GO:1901698~response to nitrogen compound	63	6.67982e-07	0.00130102
green	GOTERM_MF_ALL	GO:0050431~transforming growth factor beta binding	8	6.69191e-07	0.00107376
green	GOTERM_BP_ALL	GO:0014031~mesenchymal cell development	22	6.86904e-07	0.00133787
green	GOTERM_BP_ALL	GO:0002064~epithelial cell development	25	7.21414e-07	0.00140508
green	GOTERM_BP_ALL	GO:0060325~face morphogenesis	10	7.29423e-07	0.00142068
green	GOTERM_BP_ALL	GO:0030278~regulation of ossification	23	7.42534e-07	0.00144622
green	GOTERM_BP_ALL	GO:2000146~negative regulation of cell motility	26	7.80481e-07	0.00152013
green	GOTERM_BP_ALL	GO:0006935~chemotaxis	45	8.31975e-07	0.00162042
green	GOTERM_BP_ALL	GO:0033002~muscle cell proliferation	21	8.34973e-07	0.00162626
green	GOTERM_BP_ALL	GO:0042330~taxis	45	8.74159e-07	0.00170258
green	GOTERM_BP_ALL	GO:0030336~negative regulation of cell migration	25	9.32732e-07	0.00181666
green	GOTERM_BP_ALL	GO:0001938~positive regulation of endothelial cell proliferation	14	9.68761e-07	0.00188683
green	GOTERM_BP_ALL	GO:0006979~response to oxidative stress	36	9.94808e-07	0.00193756
green	GOTERM_BP_ALL	GO:0008217~regulation of blood pressure	22	1.01848e-06	0.00198366
green	GOTERM_BP_ALL	GO:0001885~endothelial cell development	13	1.07401e-06	0.00209183
green	GOTERM_CC_ALL	GO:0032432~actin filament bundle	13	1.08871e-06	0.00162453
green	GOTERM_BP_ALL	GO:0050730~regulation of peptidyl-tyrosine phosphorylation	25	1.09849e-06	0.0021395
green	GOTERM_BP_ALL	GO:0010634~positive regulation of epithelial cell migration	17	1.12746e-06	0.00219592
green	GOTERM_BP_ALL	GO:1903508~positive regulation of nucleic acid-templated transcription	84	1.12896e-06	0.00219884
green	GOTERM_BP_ALL	GO:0045893~positive regulation of transcription, DNA-templated	84	1.12896e-06	0.00219884
green	GOTERM_BP_ALL	GO:0045935~positive regulation of nucleobase-containing compound metabolic process	98	1.19093e-06	0.00231954
green	GOTERM_MF_ALL	GO:1901681~sulfur compound binding	26	1.22181e-06	0.00196046
green	GOTERM_BP_ALL	GO:0046903~secretion	72	1.26834e-06	0.0024703
green	GOTERM_CC_ALL	GO:0099503~secretory vesicle	39	1.31419e-06	0.00196097
green	GOTERM_CC_ALL	GO:0005833~hemoglobin complex	7	1.3751e-06	0.00205185
green	GOTERM_BP_ALL	GO:0031399~regulation of protein modification process	98	1.38499e-06	0.0026975
green	GOTERM_BP_ALL	GO:0016049~cell growth	38	1.45924e-06	0.00284211
green	GOTERM_BP_ALL	GO:0060326~cell chemotaxis	27	1.52281e-06	0.00296592
green	GOTERM_BP_ALL	GO:0001822~kidney development	28	1.55046e-06	0.00301977
green	GOTERM_BP_ALL	GO:0016192~vesicle-mediated transport	90	1.72425e-06	0.00335826
green	GOTERM_BP_ALL	GO:0002520~immune system development	58	1.80579e-06	0.00351707
green	GOTERM_CC_ALL	GO:0072562~blood microparticle	20	1.86926e-06	0.0027892
green	GOTERM_CC_ALL	GO:0005794~Golgi apparatus	87	1.91088e-06	0.00285131
green	GOTERM_BP_ALL	GO:0032940~secretion by cell	65	2.00802e-06	0.00391094
green	GOTERM_BP_ALL	GO:1902680~positive regulation of RNA biosynthetic process	84	2.05691e-06	0.00400616
green	GOTERM_BP_ALL	GO:0065009~regulation of molecular function	149	2.07888e-06	0.00404894
green	GOTERM_BP_ALL	GO:0071345~cellular response to cytokine stimulus	52	2.10254e-06	0.00409503
green	GOTERM_BP_ALL	GO:0030856~regulation of epithelial cell differentiation	18	2.12204e-06	0.00413299
green	GOTERM_CC_ALL	GO:0042641~actomyosin	13	2.21552e-06	0.00330587
green	GOTERM_BP_ALL	GO:0051591~response to cAMP	16	2.29581e-06	0.00447144
green	GOTERM_BP_ALL	GO:0071496~cellular response to external stimulus	27	2.36652e-06	0.00460915
green	GOTERM_BP_ALL	GO:0002573~myeloid leukocyte differentiation	23	2.39163e-06	0.00465805
green	GOTERM_BP_ALL	GO:0031328~positive regulation of cellular biosynthetic process	100	2.40577e-06	0.00468559
green	GOTERM_BP_ALL	GO:0006955~immune response	92	2.43011e-06	0.00473301
green	GOTERM_BP_ALL	GO:0010557~positive regulation of macromolecule biosynthetic process	94	2.58665e-06	0.00503787
green	GOTERM_BP_ALL	GO:0007044~cell-substrate junction assembly	15	2.70572e-06	0.00526978
green	GOTERM_BP_ALL	GO:0006024~glycosaminoglycan biosynthetic process	17	2.71045e-06	0.00527899
green	GOTERM_BP_ALL	GO:0043009~chordate embryonic development	45	2.73259e-06	0.00532212
green	GOTERM_BP_ALL	GO:0051271~negative regulation of cellular component movement	27	2.75002e-06	0.00535606
green	GOTERM_BP_ALL	GO:0090092~regulation of transmembrane receptor protein serine/threonine kinase signaling pathway	24	2.77906e-06	0.00541262
green	GOTERM_BP_ALL	GO:0050790~regulation of catalytic activity	127	2.81318e-06	0.00547906
green	GOTERM_BP_ALL	GO:1901136~carbohydrate derivative catabolic process	22	2.81884e-06	0.00549009
green	GOTERM_BP_ALL	GO:0030099~myeloid cell differentiation	32	2.8949e-06	0.00563821
green	GOTERM_BP_ALL	GO:0044273~sulfur compound catabolic process	11	2.93252e-06	0.0057115
green	GOTERM_BP_ALL	GO:0031099~regeneration	21	2.98895e-06	0.0058214
green	GOTERM_BP_ALL	GO:0006023~aminoglycan biosynthetic process	17	3.05355e-06	0.0059472
green	GOTERM_BP_ALL	GO:0060323~head morphogenesis	10	3.06112e-06	0.00596194
green	GOTERM_BP_ALL	GO:0051216~cartilage development	22	3.07848e-06	0.00599576
green	GOTERM_BP_ALL	GO:0010035~response to inorganic substance	39	3.21862e-06	0.00626869
green	GOTERM_BP_ALL	GO:0030947~regulation of vascular endothelial growth factor receptor signaling pathway	9	3.40297e-06	0.00662773
green	GOTERM_BP_ALL	GO:0007423~sensory organ development	41	3.42373e-06	0.00666816
green	GOTERM_BP_ALL	GO:0009792~embryo development ending in birth or egg hatching	45	3.5407e-06	0.00689596
green	GOTERM_BP_ALL	GO:0097190~apoptotic signaling pathway	45	3.5407e-06	0.00689596
green	GOTERM_BP_ALL	GO:0051173~positive regulation of nitrogen compound metabolic process	101	3.58373e-06	0.00697977
green	GOTERM_CC_ALL	GO:0005773~vacuole	74	3.59933e-06	0.00537066
green	GOTERM_BP_ALL	GO:0035987~endodermal cell differentiation	11	3.64928e-06	0.00710744
green	GOTERM_BP_ALL	GO:1904035~regulation of epithelial cell apoptotic process	13	3.74753e-06	0.00729879
green	GOTERM_BP_ALL	GO:0048608~reproductive structure development	36	3.8234e-06	0.00744654
green	GOTERM_BP_ALL	GO:0032101~regulation of response to external stimulus	52	3.8301e-06	0.00745959
green	GOTERM_BP_ALL	GO:0051384~response to glucocorticoid	19	4.20139e-06	0.0081827
green	GOTERM_MF_ALL	GO:0005520~insulin-like growth factor binding	9	4.547e-06	0.00729575
green	GOTERM_CC_ALL	GO:0005605~basal lamina	8	4.6757e-06	0.00697669
green	GOTERM_BP_ALL	GO:0071417~cellular response to organonitrogen compound	39	4.77916e-06	0.00930792
green	GOTERM_BP_ALL	GO:0007162~negative regulation of cell adhesion	24	4.82247e-06	0.00939226
green	GOTERM_BP_ALL	GO:0032103~positive regulation of response to external stimulus	27	4.84993e-06	0.00944575
green	GOTERM_CC_ALL	GO:0043235~receptor complex	30	4.87689e-06	0.00727686
green	GOTERM_BP_ALL	GO:0061458~reproductive system development	36	4.97739e-06	0.00969397
green	GOTERM_BP_ALL	GO:0003012~muscle system process	35	4.98867e-06	0.00971595
green	GOTERM_BP_ALL	GO:0045321~leukocyte activation	53	5.03423e-06	0.00980468
green	KEGG_PATHWAY	hsa04668:TNF signaling pathway	18	5.08523e-06	0.00652379
green	KEGG_PATHWAY	hsa05200:Pathways in cancer	39	5.57772e-06	0.00715559
green	GOTERM_CC_ALL	GO:0098805~whole membrane	80	5.62036e-06	0.00838617
green	KEGG_PATHWAY	hsa05145:Toxoplasmosis	18	7.47391e-06	0.00958807
greenyellow	GOTERM_CC_ALL	GO:0032991~macromolecular complex	166	1.43231e-30	2.07673e-27
greenyellow	GOTERM_CC_ALL	GO:0030529~intracellular ribonucleoprotein complex	64	3.74933e-28	5.43622e-25
greenyellow	GOTERM_CC_ALL	GO:1990904~ribonucleoprotein complex	64	4.0251e-28	5.83607e-25
greenyellow	GOTERM_CC_ALL	GO:0044422~organelle part	217	4.75669e-27	6.89681e-24
greenyellow	GOTERM_CC_ALL	GO:0044446~intracellular organelle part	214	8.72088e-27	1.26446e-23
greenyellow	GOTERM_CC_ALL	GO:0070013~intracellular organelle lumen	143	2.99887e-23	4.34812e-20
greenyellow	GOTERM_MF_ALL	GO:0003723~RNA binding	85	3.43601e-23	5.05595e-20
greenyellow	GOTERM_CC_ALL	GO:0031974~membrane-enclosed lumen	145	5.21925e-23	7.56749e-20
greenyellow	GOTERM_CC_ALL	GO:0043233~organelle lumen	143	1.58724e-22	2.30136e-19
greenyellow	GOTERM_CC_ALL	GO:0044428~nuclear part	133	1.57456e-21	2.28298e-18
greenyellow	GOTERM_CC_ALL	GO:0044424~intracellular part	270	2.67048e-21	3.87198e-18
greenyellow	GOTERM_CC_ALL	GO:0005622~intracellular	272	1.67077e-20	2.42248e-17
greenyellow	GOTERM_CC_ALL	GO:0031981~nuclear lumen	123	2.28686e-20	3.31576e-17
greenyellow	GOTERM_CC_ALL	GO:0043229~intracellular organelle	250	3.32974e-19	4.82785e-16
greenyellow	GOTERM_MF_ALL	GO:0044822~poly(A) RNA binding	64	6.25043e-18	9.19726e-15
greenyellow	GOTERM_BP_ALL	GO:0034641~cellular nitrogen compound metabolic process	175	7.94426e-18	1.4203e-14
greenyellow	GOTERM_BP_ALL	GO:0022613~ribonucleoprotein complex biogenesis	41	8.75737e-18	1.56567e-14
greenyellow	GOTERM_CC_ALL	GO:0043231~intracellular membrane-bounded organelle	235	9.37232e-18	1.35891e-14
greenyellow	GOTERM_CC_ALL	GO:0043226~organelle	256	9.28328e-16	1.28786e-12
greenyellow	GOTERM_CC_ALL	GO:0043227~membrane-bounded organelle	245	1.94458e-15	2.89768e-12
greenyellow	GOTERM_BP_ALL	GO:0006807~nitrogen compound metabolic process	177	2.75632e-15	4.9627e-12
greenyellow	GOTERM_BP_ALL	GO:0006396~RNA processing	52	3.93763e-15	6.95e-12
greenyellow	GOTERM_CC_ALL	GO:0005654~nucleoplasm	100	6.04364e-15	8.69305e-12
greenyellow	GOTERM_CC_ALL	GO:0005634~nucleus	171	3.13371e-14	4.5397e-11
greenyellow	GOTERM_BP_ALL	GO:0010467~gene expression	146	4.45851e-14	7.97917e-11
greenyellow	GOTERM_CC_ALL	GO:0043234~protein complex	117	8.15534e-13	1.18251e-09
greenyellow	GOTERM_BP_ALL	GO:0044260~cellular macromolecule metabolic process	192	3.7197e-12	6.6502e-09
greenyellow	GOTERM_BP_ALL	GO:0051436~negative regulation of ubiquitin-protein ligase activity involved in mitotic cell cycle	15	6.1565e-12	1.10069e-08
greenyellow	GOTERM_CC_ALL	GO:0005829~cytosol	101	6.65749e-12	9.65276e-09
greenyellow	GOTERM_BP_ALL	GO:0051439~regulation of ubiquitin-protein ligase activity involved in mitotic cell cycle	15	7.53337e-12	1.34685e-08
greenyellow	GOTERM_BP_ALL	GO:1904667~negative regulation of ubiquitin protein ligase activity	15	9.18786e-12	1.64264e-08
greenyellow	GOTERM_BP_ALL	GO:0051437~positive regulation of ubiquitin-protein ligase activity involved in regulation of mitotic cell cycle transition	15	1.63569e-11	2.92435e-08
greenyellow	GOTERM_CC_ALL	GO:0000502~proteasome complex	14	1.90367e-11	2.76016e-08
greenyellow	GOTERM_BP_ALL	GO:0031145~anaphase-promoting complex-dependent catabolic process	15	2.83617e-11	5.0706e-08
greenyellow	GOTERM_BP_ALL	GO:0051444~negative regulation of ubiquitin-protein transferase activity	15	3.38867e-11	6.0584e-08
greenyellow	GOTERM_BP_ALL	GO:0044237~cellular metabolic process	216	3.45831e-11	6.1829e-08
greenyellow	GOTERM_BP_ALL	GO:0042254~ribosome biogenesis	27	3.77914e-11	6.75649e-08
greenyellow	GOTERM_BP_ALL	GO:0006521~regulation of cellular amino acid metabolic process	13	4.5977e-11	8.21994e-08
greenyellow	GOTERM_BP_ALL	GO:1904668~positive regulation of ubiquitin protein ligase activity	15	4.80008e-11	8.58177e-08
greenyellow	GOTERM_CC_ALL	GO:0005840~ribosome	23	5.6072e-11	8.12997e-08
greenyellow	KEGG_PATHWAY	hsa03050:Proteasome	13	6.77457e-11	7.66685e-08
greenyellow	GOTERM_CC_ALL	GO:0043232~intracellular non-membrane-bounded organelle	110	8.6322e-11	1.2516e-07
greenyellow	GOTERM_CC_ALL	GO:0043228~non-membrane-bounded organelle	110	8.6322e-11	1.2516e-07
greenyellow	GOTERM_BP_ALL	GO:1904666~regulation of ubiquitin protein ligase activity	15	9.35392e-11	1.67233e-07
greenyellow	GOTERM_CC_ALL	GO:0044391~ribosomal subunit	20	9.93501e-11	1.44049e-07
greenyellow	GOTERM_BP_ALL	GO:0051443~positive regulation of ubiquitin-protein transferase activity	16	1.02271e-10	1.82843e-07
greenyellow	GOTERM_CC_ALL	GO:0044444~cytoplasmic part	177	1.96143e-10	2.84391e-07
greenyellow	GOTERM_BP_ALL	GO:2000060~positive regulation of protein ubiquitination involved in ubiquitin-dependent protein catabolic process	15	2.04886e-10	3.66302e-07
greenyellow	GOTERM_BP_ALL	GO:0016071~mRNA metabolic process	37	2.45877e-10	4.39588e-07
greenyellow	GOTERM_BP_ALL	GO:0006412~translation	36	2.67341e-10	4.77962e-07
greenyellow	GOTERM_BP_ALL	GO:0002479~antigen processing and presentation of exogenous peptide antigen via MHC class I, TAP-dependent	13	3.14408e-10	5.6211e-07
greenyellow	GOTERM_CC_ALL	GO:0019773~proteasome core complex, alpha-subunit complex	7	3.33079e-10	4.82937e-07
greenyellow	GOTERM_CC_ALL	GO:0005737~cytoplasm	215	3.58835e-10	5.20281e-07
greenyellow	GOTERM_BP_ALL	GO:0006415~translational termination	15	4.27131e-10	7.6364e-07
greenyellow	GOTERM_BP_ALL	GO:0042590~antigen processing and presentation of exogenous peptide antigen via MHC class I	13	5.55643e-10	9.93399e-07
greenyellow	GOTERM_BP_ALL	GO:0006397~mRNA processing	30	6.78238e-10	1.21258e-06
greenyellow	GOTERM_BP_ALL	GO:0043170~macromolecule metabolic process	197	7.28577e-10	1.30258e-06
greenyellow	GOTERM_BP_ALL	GO:0043043~peptide biosynthetic process	36	7.70341e-10	1.37724e-06
greenyellow	GOTERM_BP_ALL	GO:0051438~regulation of ubiquitin-protein transferase activity	16	8.23462e-10	1.47222e-06
greenyellow	GOTERM_BP_ALL	GO:2000058~regulation of protein ubiquitination involved in ubiquitin-dependent protein catabolic process	15	8.52099e-10	1.52341e-06
greenyellow	GOTERM_BP_ALL	GO:0034660~ncRNA metabolic process	33	8.56083e-10	1.53054e-06
greenyellow	GOTERM_BP_ALL	GO:0070126~mitochondrial translational termination	14	1.15203e-09	2.05964e-06
greenyellow	GOTERM_BP_ALL	GO:0022618~ribonucleoprotein complex assembly	20	1.66699e-09	2.9803e-06
greenyellow	GOTERM_BP_ALL	GO:0038061~NIK/NF-kappaB signaling	15	1.85327e-09	3.31335e-06
greenyellow	GOTERM_BP_ALL	GO:0033238~regulation of cellular amine metabolic process	13	2.20871e-09	3.94882e-06
greenyellow	GOTERM_MF_ALL	GO:0003735~structural constituent of ribosome	20	2.58006e-09	3.79646e-06
greenyellow	GOTERM_BP_ALL	GO:0006364~rRNA processing	22	2.7905e-09	4.98896e-06
greenyellow	GOTERM_BP_ALL	GO:0043604~amide biosynthetic process	37	2.86712e-09	5.12594e-06
greenyellow	GOTERM_MF_ALL	GO:0003676~nucleic acid binding	109	2.94865e-09	4.33882e-06
greenyellow	GOTERM_BP_ALL	GO:0000377~RNA splicing, via transesterification reactions with bulged adenosine as nucleophile	23	3.47065e-09	6.20495e-06
greenyellow	GOTERM_BP_ALL	GO:0000398~mRNA splicing, via spliceosome	23	3.47065e-09	6.20495e-06
greenyellow	GOTERM_BP_ALL	GO:1903322~positive regulation of protein modification by small protein conjugation or removal	19	3.59873e-09	6.43393e-06
greenyellow	GOTERM_BP_ALL	GO:0071826~ribonucleoprotein complex subunit organization	20	3.86808e-09	6.91549e-06
greenyellow	GOTERM_BP_ALL	GO:0006518~peptide metabolic process	39	4.10337e-09	7.33616e-06
greenyellow	GOTERM_BP_ALL	GO:0016072~rRNA metabolic process	22	4.42044e-09	7.90302e-06
greenyellow	GOTERM_BP_ALL	GO:0000375~RNA splicing, via transesterification reactions	23	4.47097e-09	7.99337e-06
greenyellow	GOTERM_BP_ALL	GO:0031398~positive regulation of protein ubiquitination	18	6.56385e-09	1.17351e-05
greenyellow	GOTERM_BP_ALL	GO:0008152~metabolic process	222	7.30749e-09	1.30646e-05
greenyellow	GOTERM_BP_ALL	GO:0032543~mitochondrial translation	15	7.58242e-09	1.35561e-05
greenyellow	GOTERM_CC_ALL	GO:0005730~nucleolus	39	8.03872e-09	1.16555e-05
greenyellow	GOTERM_BP_ALL	GO:0008380~RNA splicing	26	8.14245e-09	1.45574e-05
greenyellow	GOTERM_BP_ALL	GO:0070125~mitochondrial translational elongation	13	1.13132e-08	2.02262e-05
greenyellow	GOTERM_BP_ALL	GO:0002223~stimulatory C-type lectin receptor signaling pathway	14	1.40695e-08	2.51539e-05
greenyellow	GOTERM_BP_ALL	GO:1901564~organonitrogen compound metabolic process	71	1.59393e-08	2.84969e-05
greenyellow	GOTERM_CC_ALL	GO:0005839~proteasome core complex	8	1.76974e-08	2.56598e-05
greenyellow	GOTERM_BP_ALL	GO:0002220~innate immune response activating cell surface receptor signaling pathway	14	1.77376e-08	3.1712e-05
greenyellow	GOTERM_BP_ALL	GO:1903052~positive regulation of proteolysis involved in cellular protein catabolic process	17	1.80118e-08	3.22021e-05
greenyellow	GOTERM_BP_ALL	GO:0046483~heterocycle metabolic process	141	1.81294e-08	3.24125e-05
greenyellow	GOTERM_BP_ALL	GO:0044238~primary metabolic process	209	2.14272e-08	3.83084e-05
greenyellow	GOTERM_BP_ALL	GO:0031397~negative regulation of protein ubiquitination	15	2.16652e-08	3.87338e-05
greenyellow	GOTERM_MF_ALL	GO:0004298~threonine-type endopeptidase activity	8	2.20271e-08	3.2412e-05
greenyellow	GOTERM_MF_ALL	GO:0070003~threonine-type peptidase activity	8	2.20271e-08	3.2412e-05
greenyellow	GOTERM_BP_ALL	GO:0043603~cellular amide metabolic process	42	2.79341e-08	4.99415e-05
greenyellow	GOTERM_BP_ALL	GO:0002474~antigen processing and presentation of peptide antigen via MHC class I	13	2.82253e-08	5.04622e-05
greenyellow	GOTERM_BP_ALL	GO:0000209~protein polyubiquitination	20	2.85172e-08	5.09841e-05
greenyellow	GOTERM_BP_ALL	GO:0006725~cellular aromatic compound metabolic process	141	3.14118e-08	5.61592e-05
greenyellow	GOTERM_CC_ALL	GO:0015934~large ribosomal subunit	14	3.18807e-08	4.62243e-05
greenyellow	GOTERM_BP_ALL	GO:0006139~nucleobase-containing compound metabolic process	138	3.25196e-08	5.81397e-05
greenyellow	GOTERM_BP_ALL	GO:0071704~organic substance metabolic process	215	3.40743e-08	6.09192e-05
greenyellow	GOTERM_BP_ALL	GO:0034622~cellular macromolecular complex assembly	42	3.68698e-08	6.59172e-05
greenyellow	GOTERM_BP_ALL	GO:0006414~translational elongation	15	4.26865e-08	7.63165e-05
greenyellow	GOTERM_BP_ALL	GO:1903364~positive regulation of cellular protein catabolic process	17	5.91273e-08	0.00010571
greenyellow	GOTERM_BP_ALL	GO:1903321~negative regulation of protein modification by small protein conjugation or removal	15	6.17253e-08	0.000110355
greenyellow	GOTERM_BP_ALL	GO:1901360~organic cyclic compound metabolic process	143	6.85958e-08	0.000122638
greenyellow	GOTERM_CC_ALL	GO:0044464~cell part	275	7.77975e-08	0.0001128
greenyellow	GOTERM_CC_ALL	GO:0005681~spliceosomal complex	16	1.12274e-07	0.000162789
greenyellow	GOTERM_CC_ALL	GO:0005623~cell	275	1.16946e-07	0.000169562
greenyellow	GOTERM_CC_ALL	GO:0044451~nucleoplasm part	33	1.28719e-07	0.000186632
greenyellow	GOTERM_BP_ALL	GO:0060071~Wnt signaling pathway, planar cell polarity pathway	13	1.556e-07	0.000278188
greenyellow	GOTERM_CC_ALL	GO:0097525~spliceosomal snRNP complex	10	1.6397e-07	0.000237743
greenyellow	GOTERM_BP_ALL	GO:1901990~regulation of mitotic cell cycle phase transition	21	1.78745e-07	0.000319566
greenyellow	GOTERM_BP_ALL	GO:0043933~macromolecular complex subunit organization	73	1.94429e-07	0.000347607
greenyellow	GOTERM_BP_ALL	GO:0010608~posttranscriptional regulation of gene expression	26	2.02098e-07	0.000361317
greenyellow	GOTERM_BP_ALL	GO:1903050~regulation of proteolysis involved in cellular protein catabolic process	18	2.0721e-07	0.000370457
greenyellow	GOTERM_BP_ALL	GO:0090175~regulation of establishment of planar polarity	13	2.11524e-07	0.00037817
greenyellow	GOTERM_BP_ALL	GO:0070647~protein modification by small protein conjugation or removal	41	2.21715e-07	0.00039639
greenyellow	GOTERM_BP_ALL	GO:0090304~nucleic acid metabolic process	124	2.21834e-07	0.000396603
greenyellow	GOTERM_BP_ALL	GO:0044085~cellular component biogenesis	82	2.22624e-07	0.000398014
greenyellow	GOTERM_BP_ALL	GO:0034470~ncRNA processing	24	2.42876e-07	0.000434221
greenyellow	GOTERM_BP_ALL	GO:1901566~organonitrogen compound biosynthetic process	49	2.69465e-07	0.000481758
greenyellow	GOTERM_BP_ALL	GO:0032984~macromolecular complex disassembly	19	2.69901e-07	0.000482537
greenyellow	GOTERM_CC_ALL	GO:0031966~mitochondrial membrane	31	2.92856e-07	0.000424616
greenyellow	GOTERM_CC_ALL	GO:0005740~mitochondrial envelope	32	3.14436e-07	0.000455906
greenyellow	GOTERM_BP_ALL	GO:0032446~protein modification by small protein conjugation	37	3.20957e-07	0.000573817
greenyellow	GOTERM_BP_ALL	GO:0044106~cellular amine metabolic process	13	3.45265e-07	0.000617276
greenyellow	GOTERM_BP_ALL	GO:0002478~antigen processing and presentation of exogenous peptide antigen	15	3.81448e-07	0.000681965
greenyellow	GOTERM_CC_ALL	GO:1990234~transferase complex	32	3.86034e-07	0.000559716
greenyellow	GOTERM_CC_ALL	GO:0030532~small nuclear ribonucleoprotein complex	10	4.66496e-07	0.000676379
greenyellow	GOTERM_BP_ALL	GO:1903320~regulation of protein modification by small protein conjugation or removal	19	5.81375e-07	0.0010394
greenyellow	GOTERM_BP_ALL	GO:1901987~regulation of cell cycle phase transition	21	5.81952e-07	0.00104043
greenyellow	GOTERM_BP_ALL	GO:0090263~positive regulation of canonical Wnt signaling pathway	13	6.01447e-07	0.00107528
greenyellow	GOTERM_BP_ALL	GO:0019884~antigen processing and presentation of exogenous antigen	15	6.39029e-07	0.00114247
greenyellow	GOTERM_BP_ALL	GO:0001736~establishment of planar polarity	13	6.57598e-07	0.00117567
greenyellow	GOTERM_BP_ALL	GO:0007164~establishment of tissue polarity	13	6.57598e-07	0.00117567
greenyellow	GOTERM_BP_ALL	GO:0043624~cellular protein complex disassembly	16	6.59382e-07	0.00117886
greenyellow	GOTERM_BP_ALL	GO:1903362~regulation of cellular protein catabolic process	18	7.12145e-07	0.00127319
greenyellow	GOTERM_CC_ALL	GO:0055029~nuclear DNA-directed RNA polymerase complex	13	7.58379e-07	0.00109958
greenyellow	GOTERM_CC_ALL	GO:0000428~DNA-directed RNA polymerase complex	13	7.58379e-07	0.00109958
greenyellow	GOTERM_BP_ALL	GO:0009308~amine metabolic process	13	7.84041e-07	0.00140173
greenyellow	GOTERM_BP_ALL	GO:0031396~regulation of protein ubiquitination	18	7.94623e-07	0.00142065
greenyellow	GOTERM_CC_ALL	GO:0005743~mitochondrial inner membrane	25	8.08908e-07	0.00117284
greenyellow	GOTERM_CC_ALL	GO:0030880~RNA polymerase complex	13	8.93771e-07	0.00129589
greenyellow	GOTERM_CC_ALL	GO:0031967~organelle envelope	41	9.43517e-07	0.00136801
greenyellow	GOTERM_CC_ALL	GO:0005739~mitochondrion	53	9.70178e-07	0.00140667
greenyellow	GOTERM_BP_ALL	GO:0044772~mitotic cell cycle phase transition	26	9.83734e-07	0.00175874
greenyellow	GOTERM_CC_ALL	GO:0031975~envelope	41	1.05028e-06	0.00152281
greenyellow	GOTERM_CC_ALL	GO:0044429~mitochondrial part	37	1.27717e-06	0.00185177
greenyellow	GOTERM_BP_ALL	GO:0048002~antigen processing and presentation of peptide antigen	15	1.27788e-06	0.00228461
greenyellow	GOTERM_BP_ALL	GO:0030177~positive regulation of Wnt signaling pathway	14	1.30502e-06	0.00233313
greenyellow	GOTERM_MF_ALL	GO:0043021~ribonucleoprotein complex binding	12	1.61481e-06	0.00237611
greenyellow	GOTERM_CC_ALL	GO:0019866~organelle inner membrane	26	1.65712e-06	0.00240266
greenyellow	GOTERM_BP_ALL	GO:0010565~regulation of cellular ketone metabolic process	14	1.74341e-06	0.00311688
greenyellow	GOTERM_BP_ALL	GO:0044267~cellular protein metabolic process	116	1.92859e-06	0.00344796
greenyellow	GOTERM_BP_ALL	GO:0001738~morphogenesis of a polarized epithelium	13	1.94581e-06	0.00347873
greenyellow	GOTERM_BP_ALL	GO:0002181~cytoplasmic translation	9	1.96165e-06	0.00350706
greenyellow	GOTERM_BP_ALL	GO:0031331~positive regulation of cellular catabolic process	18	2.15565e-06	0.00385387
greenyellow	GOTERM_BP_ALL	GO:0033209~tumor necrosis factor-mediated signaling pathway	13	2.6482e-06	0.00473445
greenyellow	GOTERM_BP_ALL	GO:1903047~mitotic cell cycle process	35	2.79564e-06	0.00499802
greenyellow	GOTERM_BP_ALL	GO:0044265~cellular macromolecule catabolic process	37	2.9902e-06	0.00534586
greenyellow	GOTERM_BP_ALL	GO:0044770~cell cycle phase transition	26	3.01609e-06	0.00539215
greenyellow	GOTERM_BP_ALL	GO:0043161~proteasome-mediated ubiquitin-dependent protein catabolic process	21	3.18381e-06	0.00569198
greenyellow	GOTERM_BP_ALL	GO:0050852~T cell receptor signaling pathway	14	3.23761e-06	0.00578816
greenyellow	KEGG_PATHWAY	hsa03013:RNA transport	16	3.3897e-06	0.0038361
greenyellow	GOTERM_CC_ALL	GO:0097526~spliceosomal tri-snRNP complex	7	3.46289e-06	0.00502079
greenyellow	GOTERM_BP_ALL	GO:0043241~protein complex disassembly	17	3.52077e-06	0.00629438
greenyellow	GOTERM_CC_ALL	GO:0005761~mitochondrial ribosome	10	4.04385e-06	0.00586309
greenyellow	GOTERM_CC_ALL	GO:0000313~organellar ribosome	10	4.04385e-06	0.00586309
greenyellow	GOTERM_BP_ALL	GO:0043488~regulation of mRNA stability	13	4.12126e-06	0.00736789
greenyellow	GOTERM_BP_ALL	GO:0019882~antigen processing and presentation	16	4.38874e-06	0.00784607
greenyellow	KEGG_PATHWAY	hsa03040:Spliceosome	14	4.49572e-06	0.00508774
greenyellow	GOTERM_BP_ALL	GO:0045732~positive regulation of protein catabolic process	17	4.53008e-06	0.00809874
greenyellow	GOTERM_BP_ALL	GO:0071840~cellular component organization or biogenesis	138	5.1466e-06	0.00920088
greenyellow	GOTERM_BP_ALL	GO:0006352~DNA-templated transcription, initiation	16	5.42997e-06	0.00970746
greenyellow	GOTERM_CC_ALL	GO:0090575~RNA polymerase II transcription factor complex	11	5.72951e-06	0.008307
greenyellow	KEGG_PATHWAY	hsa03010:Ribosome	14	5.76537e-06	0.00652453
greenyellow	GOTERM_CC_ALL	GO:0044798~nuclear transcription factor complex	12	5.98443e-06	0.00867658
grey60	GOTERM_BP_ALL	GO:0009653~anatomical structure morphogenesis	49	4.67103e-09	8.46528e-06
grey60	GOTERM_BP_ALL	GO:0048869~cellular developmental process	61	3.59029e-08	6.50665e-05
grey60	GOTERM_BP_ALL	GO:0030154~cell differentiation	57	7.29275e-08	0.000132166
grey60	GOTERM_BP_ALL	GO:0000902~cell morphogenesis	30	8.38712e-08	0.000151999
grey60	GOTERM_BP_ALL	GO:0007423~sensory organ development	19	9.16929e-08	0.000166174
grey60	GOTERM_BP_ALL	GO:0002009~morphogenesis of an epithelium	19	1.37692e-07	0.000249539
grey60	GOTERM_BP_ALL	GO:0019827~stem cell population maintenance	11	1.54354e-07	0.000279734
grey60	GOTERM_BP_ALL	GO:0060429~epithelium development	27	1.78437e-07	0.000323379
grey60	GOTERM_BP_ALL	GO:0098727~maintenance of cell number	11	1.88379e-07	0.000341398
grey60	GOTERM_BP_ALL	GO:0032989~cellular component morphogenesis	30	3.20869e-07	0.000581507
grey60	GOTERM_BP_ALL	GO:0048729~tissue morphogenesis	20	4.00625e-07	0.000726048
grey60	GOTERM_BP_ALL	GO:0048513~animal organ development	50	4.28786e-07	0.000777083
grey60	GOTERM_BP_ALL	GO:0010628~positive regulation of gene expression	34	6.24396e-07	0.00113158
grey60	GOTERM_BP_ALL	GO:0035239~tube morphogenesis	15	6.25767e-07	0.00113407
grey60	GOTERM_BP_ALL	GO:0009887~organ morphogenesis	25	7.35661e-07	0.00133323
grey60	GOTERM_BP_ALL	GO:0048468~cell development	37	7.81387e-07	0.00141609
grey60	GOTERM_BP_ALL	GO:0072359~circulatory system development	24	1.17263e-06	0.00212513
grey60	GOTERM_BP_ALL	GO:0072358~cardiovascular system development	24	1.17263e-06	0.00212513
grey60	GOTERM_CC_ALL	GO:0005925~focal adhesion	15	2.12481e-06	0.00294829
grey60	GOTERM_BP_ALL	GO:0001654~eye development	14	2.32242e-06	0.00420882
grey60	GOTERM_CC_ALL	GO:0005924~cell-substrate adherens junction	15	2.32283e-06	0.00322305
grey60	GOTERM_BP_ALL	GO:0048754~branching morphogenesis of an epithelial tube	10	2.40194e-06	0.00435293
grey60	GOTERM_BP_ALL	GO:0009966~regulation of signal transduction	44	2.6667e-06	0.00483274
grey60	GOTERM_CC_ALL	GO:0030055~cell-substrate junction	15	2.68971e-06	0.00373211
grey60	GOTERM_BP_ALL	GO:0048731~system development	59	3.19223e-06	0.00578511
grey60	GOTERM_BP_ALL	GO:0050678~regulation of epithelial cell proliferation	13	4.38684e-06	0.00794995
grey60	GOTERM_BP_ALL	GO:0045893~positive regulation of transcription, DNA-templated	28	5.16724e-06	0.00936414
grey60	GOTERM_BP_ALL	GO:1903508~positive regulation of nucleic acid-templated transcription	28	5.16724e-06	0.00936414
grey60	GOTERM_CC_ALL	GO:0005912~adherens junction	19	6.9572e-06	0.00965318
lightcyan	GOTERM_CC_ALL	GO:0005622~intracellular	197	2.95346e-06	0.00417653
lightcyan	GOTERM_CC_ALL	GO:0044424~intracellular part	193	5.52242e-06	0.0078092
lightgreen	GOTERM_CC_ALL	GO:0097458~neuron part	24	1.13474e-06	0.00155062
lightyellow	GOTERM_BP_ALL	GO:0007156~homophilic cell adhesion via plasma membrane adhesion molecules	19	2.86551e-19	4.97021e-16
lightyellow	GOTERM_BP_ALL	GO:0098742~cell-cell adhesion via plasma-membrane adhesion molecules	20	9.97278e-18	1.72977e-14
lightyellow	GOTERM_BP_ALL	GO:0007399~nervous system development	42	2.94316e-14	5.10259e-11
lightyellow	GOTERM_MF_ALL	GO:0005509~calcium ion binding	25	8.37384e-14	1.16718e-10
lightyellow	GOTERM_BP_ALL	GO:0048731~system development	50	4.67223e-09	8.10394e-06
lightyellow	GOTERM_BP_ALL	GO:0098609~cell-cell adhesion	25	6.26729e-09	1.08706e-05
lightyellow	GOTERM_BP_ALL	GO:0044767~single-organism developmental process	57	7.41714e-09	1.2865e-05
lightyellow	GOTERM_BP_ALL	GO:0007275~multicellular organism development	53	1.17252e-08	2.03373e-05
lightyellow	GOTERM_BP_ALL	GO:0032502~developmental process	57	2.30119e-08	3.99139e-05
lightyellow	GOTERM_BP_ALL	GO:0048856~anatomical structure development	56	2.48138e-08	4.30392e-05
lightyellow	GOTERM_CC_ALL	GO:0005887~integral component of plasma membrane	29	2.53588e-08	3.3887e-05
lightyellow	GOTERM_CC_ALL	GO:0031226~intrinsic component of plasma membrane	29	5.91654e-08	7.90628e-05
lightyellow	GOTERM_BP_ALL	GO:0044707~single-multicellular organism process	58	5.95891e-08	0.000103357
lightyellow	GOTERM_CC_ALL	GO:0005886~plasma membrane	54	9.65998e-08	0.000129086
lightyellow	GOTERM_BP_ALL	GO:0099537~trans-synaptic signaling	17	1.16864e-07	0.000202699
lightyellow	GOTERM_BP_ALL	GO:0099536~synaptic signaling	17	1.16864e-07	0.000202699
lightyellow	GOTERM_BP_ALL	GO:0098916~anterograde trans-synaptic signaling	17	1.16864e-07	0.000202699
lightyellow	GOTERM_BP_ALL	GO:0007268~chemical synaptic transmission	17	1.16864e-07	0.000202699
lightyellow	GOTERM_CC_ALL	GO:0071944~cell periphery	54	2.12131e-07	0.00028347
lightyellow	GOTERM_BP_ALL	GO:0031175~neuron projection development	19	2.68927e-07	0.00046645
lightyellow	GOTERM_CC_ALL	GO:0031224~intrinsic component of membrane	58	3.39306e-07	0.000453414
lightyellow	GOTERM_CC_ALL	GO:0044425~membrane part	64	4.38811e-07	0.000586383
lightyellow	GOTERM_CC_ALL	GO:0016021~integral component of membrane	57	4.85521e-07	0.000648801
lightyellow	GOTERM_BP_ALL	GO:0007155~cell adhesion	27	5.28306e-07	0.000916339
lightyellow	GOTERM_CC_ALL	GO:0044459~plasma membrane part	35	5.5305e-07	0.000739039
lightyellow	GOTERM_BP_ALL	GO:0022610~biological adhesion	27	5.65595e-07	0.000981015
lightyellow	GOTERM_BP_ALL	GO:0032501~multicellular organismal process	61	1.66953e-06	0.00289575
lightyellow	GOTERM_BP_ALL	GO:0048666~neuron development	19	2.96352e-06	0.00514008
lightyellow	GOTERM_BP_ALL	GO:0030030~cell projection organization	22	3.81812e-06	0.00662229
magenta	GOTERM_CC_ALL	GO:0044444~cytoplasmic part	241	7.74958e-09	1.13006e-05
magenta	GOTERM_BP_ALL	GO:0007272~ensheathment of neurons	16	1.14168e-08	2.14256e-05
magenta	GOTERM_BP_ALL	GO:0008366~axon ensheathment	16	1.14168e-08	2.14256e-05
magenta	GOTERM_CC_ALL	GO:0043209~myelin sheath	20	1.58574e-08	2.31236e-05
magenta	GOTERM_BP_ALL	GO:0042552~myelination	15	5.87361e-08	0.000110228
magenta	GOTERM_CC_ALL	GO:0005737~cytoplasm	295	1.22636e-07	0.00017883
magenta	GOTERM_CC_ALL	GO:0043218~compact myelin	7	8.50935e-07	0.00124085
magenta	GOTERM_CC_ALL	GO:0016020~membrane	262	1.44526e-06	0.00210749
magenta	GOTERM_CC_ALL	GO:0015629~actin cytoskeleton	29	2.97799e-06	0.00434249
magenta	GOTERM_CC_ALL	GO:0071944~cell periphery	162	4.04793e-06	0.00590262
midnightblue	GOTERM_BP_ALL	GO:1903047~mitotic cell cycle process	96	1.17253e-58	2.17042e-55
midnightblue	GOTERM_BP_ALL	GO:0000278~mitotic cell cycle	99	1.43178e-58	2.6503e-55
midnightblue	GOTERM_BP_ALL	GO:0022402~cell cycle process	108	9.82011e-54	1.81775e-50
midnightblue	GOTERM_BP_ALL	GO:0007049~cell cycle	116	3.1537e-52	5.83765e-49
midnightblue	GOTERM_BP_ALL	GO:0051301~cell division	70	8.99278e-45	1.66461e-41
midnightblue	GOTERM_BP_ALL	GO:0044770~cell cycle phase transition	65	1.11335e-40	2.06086e-37
midnightblue	GOTERM_BP_ALL	GO:0007067~mitotic nuclear division	59	3.60671e-40	6.6762e-37
midnightblue	GOTERM_BP_ALL	GO:0044772~mitotic cell cycle phase transition	63	3.77453e-40	6.98683e-37
midnightblue	GOTERM_BP_ALL	GO:0000280~nuclear division	64	6.38779e-38	1.18241e-34
midnightblue	GOTERM_BP_ALL	GO:0048285~organelle fission	64	3.09004e-36	5.71982e-33
midnightblue	KEGG_PATHWAY	hsa04110:Cell cycle	32	1.10832e-30	1.29594e-27
midnightblue	GOTERM_BP_ALL	GO:0007059~chromosome segregation	45	6.0334e-30	1.11681e-26
midnightblue	GOTERM_CC_ALL	GO:0005694~chromosome	66	2.49176e-29	3.47172e-26
midnightblue	GOTERM_BP_ALL	GO:0051726~regulation of cell cycle	69	3.71721e-29	6.88073e-26
midnightblue	GOTERM_CC_ALL	GO:0044427~chromosomal part	62	6.78531e-29	9.45382e-26
midnightblue	GOTERM_CC_ALL	GO:0098687~chromosomal region	42	3.38152e-27	4.71139e-24
midnightblue	GOTERM_BP_ALL	GO:0051276~chromosome organization	72	1.60351e-26	2.96817e-23
midnightblue	GOTERM_BP_ALL	GO:0000819~sister chromatid segregation	36	1.81508e-26	3.35979e-23
midnightblue	GOTERM_BP_ALL	GO:0098813~nuclear chromosome segregation	39	5.57097e-26	1.03121e-22
midnightblue	GOTERM_BP_ALL	GO:0044843~cell cycle G1/S phase transition	36	3.59934e-25	6.66255e-22
midnightblue	GOTERM_CC_ALL	GO:0031981~nuclear lumen	118	5.02378e-24	6.99952e-21
midnightblue	GOTERM_CC_ALL	GO:0000793~condensed chromosome	32	1.28223e-23	1.7865e-20
midnightblue	GOTERM_CC_ALL	GO:0044428~nuclear part	124	1.59471e-23	2.22188e-20
midnightblue	GOTERM_BP_ALL	GO:0000082~G1/S transition of mitotic cell cycle	33	5.12702e-23	9.49036e-20
midnightblue	GOTERM_CC_ALL	GO:0005654~nucleoplasm	103	1.06924e-21	1.48975e-18
midnightblue	GOTERM_CC_ALL	GO:0000775~chromosome, centromeric region	29	1.83663e-21	2.55893e-18
midnightblue	GOTERM_CC_ALL	GO:0005634~nucleus	164	7.13337e-20	9.93877e-17
midnightblue	GOTERM_CC_ALL	GO:0005819~spindle	33	7.83619e-20	1.0918e-16
midnightblue	GOTERM_CC_ALL	GO:0070013~intracellular organelle lumen	123	9.54701e-20	1.33016e-16
midnightblue	GOTERM_BP_ALL	GO:0010564~regulation of cell cycle process	45	1.07611e-19	1.99192e-16
midnightblue	GOTERM_BP_ALL	GO:0007346~regulation of mitotic cell cycle	41	1.99035e-19	3.68423e-16
midnightblue	GOTERM_BP_ALL	GO:0000070~mitotic sister chromatid segregation	25	2.9579e-19	5.47523e-16
midnightblue	GOTERM_CC_ALL	GO:0043233~organelle lumen	123	3.93097e-19	5.47694e-16
midnightblue	GOTERM_CC_ALL	GO:0031974~membrane-enclosed lumen	123	1.17409e-18	1.63584e-15
midnightblue	GOTERM_CC_ALL	GO:0000779~condensed chromosome, centromeric region	22	1.49902e-18	2.08855e-15
midnightblue	GOTERM_CC_ALL	GO:0000776~kinetochore	22	5.09251e-17	7.09528e-14
midnightblue	GOTERM_CC_ALL	GO:0000777~condensed chromosome kinetochore	20	9.31003e-17	1.55431e-13
midnightblue	GOTERM_BP_ALL	GO:0007062~sister chromatid cohesion	22	1.02527e-16	2.10942e-13
midnightblue	GOTERM_BP_ALL	GO:0051983~regulation of chromosome segregation	19	1.18982e-16	2.10942e-13
midnightblue	GOTERM_BP_ALL	GO:0006260~DNA replication	30	1.20473e-16	2.10942e-13
midnightblue	GOTERM_CC_ALL	GO:0043228~non-membrane-bounded organelle	111	3.99535e-16	6.21725e-13
midnightblue	GOTERM_CC_ALL	GO:0043232~intracellular non-membrane-bounded organelle	111	3.99535e-16	6.21725e-13
midnightblue	GOTERM_CC_ALL	GO:0000228~nuclear chromosome	38	5.02556e-16	7.77156e-13
midnightblue	GOTERM_BP_ALL	GO:0016043~cellular component organization	149	6.37244e-16	1.23235e-12
midnightblue	GOTERM_BP_ALL	GO:0044839~cell cycle G2/M phase transition	25	7.9189e-16	1.44329e-12
midnightblue	GOTERM_BP_ALL	GO:0006996~organelle organization	110	9.93102e-16	1.85407e-12
midnightblue	GOTERM_BP_ALL	GO:0000086~G2/M transition of mitotic cell cycle	24	1.52189e-15	2.87548e-12
midnightblue	GOTERM_BP_ALL	GO:0071840~cellular component organization or biogenesis	150	2.58072e-15	4.72955e-12
midnightblue	GOTERM_CC_ALL	GO:0000922~spindle pole	20	1.35613e-14	1.88738e-11
midnightblue	GOTERM_BP_ALL	GO:1902589~single-organism organelle organization	65	1.44838e-14	2.6712e-11
midnightblue	GOTERM_CC_ALL	GO:0044422~organelle part	171	2.16567e-14	3.01648e-11
midnightblue	GOTERM_BP_ALL	GO:0071103~DNA conformation change	27	4.62148e-14	8.54872e-11
midnightblue	GOTERM_CC_ALL	GO:0015630~microtubule cytoskeleton	50	4.63631e-14	6.46594e-11
midnightblue	GOTERM_BP_ALL	GO:0006259~DNA metabolic process	49	5.57538e-14	1.03162e-10
midnightblue	GOTERM_BP_ALL	GO:0045787~positive regulation of cell cycle	29	6.1495e-14	1.13853e-10
midnightblue	GOTERM_CC_ALL	GO:0044446~intracellular organelle part	167	1.16708e-13	1.6257e-10
midnightblue	GOTERM_BP_ALL	GO:0000075~cell cycle checkpoint	24	2.04242e-13	3.78131e-10
midnightblue	GOTERM_BP_ALL	GO:0006261~DNA-dependent DNA replication	20	2.2716e-13	4.20464e-10
midnightblue	GOTERM_BP_ALL	GO:0008283~cell proliferation	68	3.16241e-13	5.85287e-10
midnightblue	GOTERM_CC_ALL	GO:0044454~nuclear chromosome part	33	4.54396e-13	6.33127e-10
midnightblue	GOTERM_BP_ALL	GO:0007088~regulation of mitotic nuclear division	19	1.38088e-12	2.5561e-09
midnightblue	GOTERM_BP_ALL	GO:0006323~DNA packaging	22	1.62054e-12	2.9998e-09
midnightblue	GOTERM_BP_ALL	GO:0051783~regulation of nuclear division	20	2.15505e-12	3.98911e-09
midnightblue	GOTERM_BP_ALL	GO:0090068~positive regulation of cell cycle process	23	1.08172e-11	2.00232e-08
midnightblue	GOTERM_BP_ALL	GO:1901987~regulation of cell cycle phase transition	26	1.47536e-11	2.73097e-08
midnightblue	GOTERM_BP_ALL	GO:1901990~regulation of mitotic cell cycle phase transition	25	1.91946e-11	3.553e-08
midnightblue	GOTERM_CC_ALL	GO:0043229~intracellular organelle	207	2.69522e-11	3.75519e-08
midnightblue	GOTERM_BP_ALL	GO:0006270~DNA replication initiation	11	3.79858e-11	7.03136e-08
midnightblue	KEGG_PATHWAY	hsa03030:DNA replication	11	6.68906e-11	7.82137e-08
midnightblue	GOTERM_BP_ALL	GO:0000083~regulation of transcription involved in G1/S transition of mitotic cell cycle	10	7.73226e-11	1.43128e-07
midnightblue	GOTERM_BP_ALL	GO:0000226~microtubule cytoskeleton organization	28	9.51693e-11	1.76163e-07
midnightblue	GOTERM_BP_ALL	GO:0045786~negative regulation of cell cycle	29	1.57322e-10	2.91211e-07
midnightblue	GOTERM_CC_ALL	GO:0044430~cytoskeletal part	53	3.04366e-10	4.24066e-07
midnightblue	GOTERM_BP_ALL	GO:0007051~spindle organization	15	5.23636e-10	9.69276e-07
midnightblue	GOTERM_BP_ALL	GO:0007093~mitotic cell cycle checkpoint	17	1.03206e-09	1.9104e-06
midnightblue	GOTERM_CC_ALL	GO:0044424~intracellular part	221	1.69873e-09	2.3668e-06
midnightblue	GOTERM_BP_ALL	GO:0006271~DNA strand elongation involved in DNA replication	9	1.87622e-09	3.47298e-06
midnightblue	GOTERM_BP_ALL	GO:0045930~negative regulation of mitotic cell cycle	19	2.45473e-09	4.54382e-06
midnightblue	GOTERM_CC_ALL	GO:0005813~centrosome	27	2.67477e-09	3.7267e-06
midnightblue	GOTERM_CC_ALL	GO:0043231~intracellular membrane-bounded organelle	190	3.92934e-09	5.47467e-06
midnightblue	GOTERM_CC_ALL	GO:0005829~cytosol	84	4.49821e-09	6.26726e-06
midnightblue	GOTERM_CC_ALL	GO:0043226~organelle	213	5.00368e-09	6.97151e-06
midnightblue	GOTERM_BP_ALL	GO:0051321~meiotic cell cycle	19	5.35022e-09	9.90352e-06
midnightblue	GOTERM_BP_ALL	GO:0051225~spindle assembly	13	5.39081e-09	9.97865e-06
midnightblue	GOTERM_BP_ALL	GO:0000079~regulation of cyclin-dependent protein serine/threonine kinase activity	13	6.13228e-09	1.13511e-05
midnightblue	GOTERM_CC_ALL	GO:0005856~cytoskeleton	60	6.30922e-09	8.7905e-06
midnightblue	GOTERM_BP_ALL	GO:1904029~regulation of cyclin-dependent protein kinase activity	13	6.96423e-09	1.28911e-05
midnightblue	GOTERM_BP_ALL	GO:0031570~DNA integrity checkpoint	16	7.77843e-09	1.43982e-05
midnightblue	GOTERM_MF_ALL	GO:0005515~protein binding	186	9.62095e-09	1.42857e-05
midnightblue	GOTERM_CC_ALL	GO:0005815~microtubule organizing center	30	1.04912e-08	1.46171e-05
midnightblue	GOTERM_BP_ALL	GO:0022616~DNA strand elongation	9	1.17346e-08	2.17212e-05
midnightblue	GOTERM_BP_ALL	GO:0044763~single-organism cellular process	211	1.46822e-08	2.71775e-05
midnightblue	GOTERM_BP_ALL	GO:0030261~chromosome condensation	9	1.97643e-08	3.65847e-05
midnightblue	GOTERM_MF_ALL	GO:0003682~chromatin binding	26	2.18778e-08	3.24853e-05
midnightblue	GOTERM_CC_ALL	GO:0000794~condensed nuclear chromosome	12	2.34816e-08	3.27164e-05
midnightblue	GOTERM_CC_ALL	GO:0005622~intracellular	222	2.58248e-08	3.59812e-05
midnightblue	GOTERM_BP_ALL	GO:0033045~regulation of sister chromatid segregation	11	3.44469e-08	6.37629e-05
midnightblue	KEGG_PATHWAY	hsa04115:p53 signaling pathway	11	4.44374e-08	5.19597e-05
midnightblue	GOTERM_BP_ALL	GO:0007017~microtubule-based process	29	6.4605e-08	0.000119587
midnightblue	GOTERM_BP_ALL	GO:0051304~chromosome separation	11	8.00958e-08	0.000148261
midnightblue	GOTERM_CC_ALL	GO:0000780~condensed nuclear chromosome, centromeric region	7	1.20997e-07	0.000168583
midnightblue	GOTERM_CC_ALL	GO:0005657~replication fork	10	1.6142e-07	0.000224902
midnightblue	GOTERM_CC_ALL	GO:0000778~condensed nuclear chromosome kinetochore	6	1.71513e-07	0.000238965
midnightblue	GOTERM_BP_ALL	GO:1902850~microtubule cytoskeleton organization involved in mitosis	9	2.05023e-07	0.000379507
midnightblue	GOTERM_MF_ALL	GO:0019901~protein kinase binding	25	2.40506e-07	0.000357115
midnightblue	GOTERM_BP_ALL	GO:0051988~regulation of attachment of spindle microtubules to kinetochore	6	2.41361e-07	0.00044677
midnightblue	GOTERM_BP_ALL	GO:0009790~embryo development	36	2.41666e-07	0.000447335
midnightblue	GOTERM_BP_ALL	GO:1901991~negative regulation of mitotic cell cycle phase transition	14	3.14773e-07	0.000582658
midnightblue	GOTERM_BP_ALL	GO:0051310~metaphase plate congression	9	3.45955e-07	0.000640378
midnightblue	GOTERM_BP_ALL	GO:0010948~negative regulation of cell cycle process	17	3.53366e-07	0.000654096
midnightblue	GOTERM_CC_ALL	GO:0043234~protein complex	90	3.58525e-07	0.000499524
midnightblue	GOTERM_CC_ALL	GO:0000785~chromatin	23	3.67114e-07	0.000511491
midnightblue	GOTERM_BP_ALL	GO:0090304~nucleic acid metabolic process	111	4.0532e-07	0.000750265
midnightblue	GOTERM_BP_ALL	GO:0010965~regulation of mitotic sister chromatid separation	9	4.08422e-07	0.000756007
midnightblue	GOTERM_BP_ALL	GO:0045165~cell fate commitment	17	4.17118e-07	0.000772103
midnightblue	GOTERM_BP_ALL	GO:0008284~positive regulation of cell proliferation	33	4.67016e-07	0.000864465
midnightblue	GOTERM_BP_ALL	GO:0006974~cellular response to DNA damage stimulus	32	4.78595e-07	0.000885898
midnightblue	GOTERM_BP_ALL	GO:0044784~metaphase/anaphase transition of cell cycle	9	4.80295e-07	0.000889046
midnightblue	GOTERM_MF_ALL	GO:0019900~kinase binding	26	5.16821e-07	0.0007674
midnightblue	GOTERM_BP_ALL	GO:0051303~establishment of chromosome localization	10	5.56038e-07	0.00102925
midnightblue	GOTERM_BP_ALL	GO:0051306~mitotic sister chromatid separation	9	5.62715e-07	0.00104161
midnightblue	GOTERM_BP_ALL	GO:0050000~chromosome localization	10	6.30244e-07	0.00116661
midnightblue	GOTERM_BP_ALL	GO:0010604~positive regulation of macromolecule metabolic process	72	7.27311e-07	0.00134628
midnightblue	GOTERM_BP_ALL	GO:1901988~negative regulation of cell cycle phase transition	14	7.47403e-07	0.00138347
midnightblue	GOTERM_CC_ALL	GO:0043227~membrane-bounded organelle	197	7.83546e-07	0.00109169
midnightblue	GOTERM_BP_ALL	GO:0044699~single-organism process	219	8.46788e-07	0.00156743
midnightblue	GOTERM_MF_ALL	GO:0003677~DNA binding	64	8.64337e-07	0.0012834
midnightblue	GOTERM_BP_ALL	GO:0060255~regulation of macromolecule metabolic process	120	8.70919e-07	0.0016121
midnightblue	GOTERM_BP_ALL	GO:0048522~positive regulation of cellular process	103	1.08447e-06	0.00200739
midnightblue	GOTERM_BP_ALL	GO:0031577~spindle checkpoint	8	1.13075e-06	0.00209306
midnightblue	GOTERM_BP_ALL	GO:0033047~regulation of mitotic sister chromatid segregation	9	1.18074e-06	0.00218558
midnightblue	GOTERM_CC_ALL	GO:0051233~spindle midzone	7	1.20762e-06	0.00168253
midnightblue	GOTERM_BP_ALL	GO:0007052~mitotic spindle organization	8	1.35411e-06	0.0025065
midnightblue	GOTERM_BP_ALL	GO:0000077~DNA damage checkpoint	13	1.38802e-06	0.00256926
midnightblue	GOTERM_BP_ALL	GO:0071214~cellular response to abiotic stimulus	17	1.53231e-06	0.00283634
midnightblue	GOTERM_CC_ALL	GO:0030496~midbody	12	1.63885e-06	0.00228335
midnightblue	GOTERM_BP_ALL	GO:0031145~anaphase-promoting complex-dependent catabolic process	10	1.7848e-06	0.0033037
midnightblue	GOTERM_CC_ALL	GO:0000781~chromosome, telomeric region	13	1.89344e-06	0.00263806
midnightblue	GOTERM_CC_ALL	GO:0032991~macromolecular complex	99	1.94436e-06	0.002709
midnightblue	GOTERM_BP_ALL	GO:1902806~regulation of cell cycle G1/S phase transition	13	1.97265e-06	0.00365141
midnightblue	GOTERM_BP_ALL	GO:0044260~cellular macromolecule metabolic process	156	2.02629e-06	0.0037507
midnightblue	GOTERM_CC_ALL	GO:0005874~microtubule	20	2.05674e-06	0.00286558
midnightblue	GOTERM_BP_ALL	GO:0051338~regulation of transferase activity	34	2.07958e-06	0.00384933
midnightblue	GOTERM_BP_ALL	GO:0006281~DNA repair	24	2.16867e-06	0.00401423
midnightblue	GOTERM_BP_ALL	GO:0001708~cell fate specification	10	2.449e-06	0.00453313
midnightblue	GOTERM_BP_ALL	GO:0090307~mitotic spindle assembly	8	2.65173e-06	0.00490837
midnightblue	GOTERM_BP_ALL	GO:0043009~chordate embryonic development	25	2.694e-06	0.0049866
midnightblue	GOTERM_BP_ALL	GO:0042127~regulation of cell proliferation	46	2.97671e-06	0.0055099
midnightblue	GOTERM_BP_ALL	GO:0009792~embryo development ending in birth or egg hatching	25	3.20711e-06	0.00593635
midnightblue	GOTERM_BP_ALL	GO:1903046~meiotic cell cycle process	14	3.21376e-06	0.00594866
midnightblue	GOTERM_BP_ALL	GO:0009059~macromolecule biosynthetic process	108	3.43687e-06	0.00636163
midnightblue	GOTERM_BP_ALL	GO:1904666~regulation of ubiquitin protein ligase activity	10	3.65798e-06	0.00677087
midnightblue	GOTERM_BP_ALL	GO:0033044~regulation of chromosome organization	17	3.88629e-06	0.00719347
midnightblue	GOTERM_BP_ALL	GO:0030071~regulation of mitotic metaphase/anaphase transition	8	4.19688e-06	0.00776835
midnightblue	GOTERM_BP_ALL	GO:0043170~macromolecule metabolic process	165	4.23676e-06	0.00784216
midnightblue	GOTERM_BP_ALL	GO:0009893~positive regulation of metabolic process	73	4.23712e-06	0.00784283
midnightblue	GOTERM_BP_ALL	GO:0045892~negative regulation of transcription, DNA-templated	37	4.39248e-06	0.00813038
midnightblue	GOTERM_BP_ALL	GO:0034645~cellular macromolecule biosynthetic process	105	4.56562e-06	0.00845084
midnightblue	GOTERM_BP_ALL	GO:1902099~regulation of metaphase/anaphase transition of cell cycle	8	4.85436e-06	0.00898527
midnightblue	GOTERM_BP_ALL	GO:0031497~chromatin assembly	13	4.94047e-06	0.00914465
midnightblue	GOTERM_BP_ALL	GO:0031325~positive regulation of cellular metabolic process	69	5.24804e-06	0.00971393
midnightblue	KEGG_PATHWAY	hsa04114:Oocyte meiosis	11	5.35093e-06	0.00625654
orange	GOTERM_CC_ALL	GO:0005929~cilium	14	1.40907e-12	1.63414e-09
orange	GOTERM_CC_ALL	GO:0044441~ciliary part	12	1.00896e-11	1.1701e-08
orange	GOTERM_BP_ALL	GO:0060271~cilium morphogenesis	10	3.04608e-10	4.70717e-07
orange	GOTERM_BP_ALL	GO:0035082~axoneme assembly	7	4.13625e-10	6.39183e-07
orange	GOTERM_BP_ALL	GO:0042384~cilium assembly	9	2.07885e-09	3.21248e-06
orange	GOTERM_BP_ALL	GO:0044782~cilium organization	9	4.46646e-09	6.90212e-06
orange	GOTERM_BP_ALL	GO:0001578~microtubule bundle formation	7	4.48776e-09	6.93503e-06
orange	GOTERM_CC_ALL	GO:0044430~cytoskeletal part	16	1.13022e-08	1.31073e-05
orange	GOTERM_CC_ALL	GO:0005930~axoneme	7	1.57564e-08	1.82728e-05
orange	GOTERM_CC_ALL	GO:0097014~ciliary plasm	7	1.57564e-08	1.82728e-05
orange	GOTERM_BP_ALL	GO:0010927~cellular component assembly involved in morphogenesis	9	3.36304e-08	5.19698e-05
orange	GOTERM_CC_ALL	GO:0005856~cytoskeleton	17	6.5538e-08	7.60048e-05
orange	GOTERM_CC_ALL	GO:0044463~cell projection part	12	3.49654e-07	0.000405496
orange	GOTERM_BP_ALL	GO:0030031~cell projection assembly	9	5.08211e-07	0.000785346
orange	GOTERM_BP_ALL	GO:0070925~organelle assembly	10	1.32205e-06	0.00204297
orange	GOTERM_CC_ALL	GO:0015630~microtubule cytoskeleton	12	1.46666e-06	0.00170088
orange	GOTERM_CC_ALL	GO:0042995~cell projection	14	6.18268e-06	0.00716986
pink	GOTERM_CC_ALL	GO:0044444~cytoplasmic part	288	1.4014e-20	2.08358e-17
pink	GOTERM_CC_ALL	GO:0005737~cytoplasm	343	7.4543e-19	1.10829e-15
pink	GOTERM_CC_ALL	GO:0005622~intracellular	397	1.03497e-13	1.53844e-10
pink	GOTERM_CC_ALL	GO:0044424~intracellular part	389	6.38147e-13	9.48797e-10
pink	GOTERM_CC_ALL	GO:0044446~intracellular organelle part	265	2.50088e-11	3.71826e-08
pink	GOTERM_CC_ALL	GO:0098588~bounding membrane of organelle	87	3.99679e-11	5.94237e-08
pink	GOTERM_CC_ALL	GO:0005829~cytosol	137	9.21501e-11	1.37007e-07
pink	GOTERM_CC_ALL	GO:0044422~organelle part	267	1.12394e-10	1.67105e-07
pink	GOTERM_CC_ALL	GO:0012505~endomembrane system	150	1.46137e-10	2.17275e-07
pink	GOTERM_BP_ALL	GO:0044257~cellular protein catabolic process	47	4.6717e-10	8.69741e-07
pink	GOTERM_CC_ALL	GO:0043227~membrane-bounded organelle	349	4.87125e-10	7.24249e-07
pink	GOTERM_CC_ALL	GO:0043226~organelle	368	5.25019e-10	7.80589e-07
pink	GOTERM_BP_ALL	GO:0051603~proteolysis involved in cellular protein catabolic process	45	1.04816e-09	1.95138e-06
pink	GOTERM_BP_ALL	GO:0019941~modification-dependent protein catabolic process	42	1.07454e-09	2.00049e-06
pink	GOTERM_BP_ALL	GO:0010498~proteasomal protein catabolic process	34	1.07731e-09	2.00566e-06
pink	GOTERM_BP_ALL	GO:0046907~intracellular transport	79	1.13149e-09	2.10651e-06
pink	GOTERM_CC_ALL	GO:0031090~organelle membrane	111	1.42493e-09	2.11856e-06
pink	GOTERM_BP_ALL	GO:0051649~establishment of localization in cell	92	1.56187e-09	2.90777e-06
pink	GOTERM_BP_ALL	GO:0043632~modification-dependent macromolecule catabolic process	42	1.60631e-09	2.9905e-06
pink	GOTERM_CC_ALL	GO:0043229~intracellular organelle	345	1.61487e-09	2.40096e-06
pink	GOTERM_BP_ALL	GO:0045184~establishment of protein localization	92	2.39192e-09	4.4531e-06
pink	GOTERM_BP_ALL	GO:0006511~ubiquitin-dependent protein catabolic process	41	2.39781e-09	4.46405e-06
pink	GOTERM_BP_ALL	GO:0051641~cellular localization	108	2.69016e-09	5.00833e-06
pink	GOTERM_MF_ALL	GO:0032561~guanyl ribonucleotide binding	33	3.86592e-09	6.01817e-06
pink	GOTERM_MF_ALL	GO:0019001~guanyl nucleotide binding	33	4.11514e-09	6.40613e-06
pink	GOTERM_BP_ALL	GO:0015031~protein transport	86	4.71902e-09	8.78552e-06
pink	GOTERM_BP_ALL	GO:0033036~macromolecule localization	115	6.70765e-09	1.24878e-05
pink	GOTERM_CC_ALL	GO:0005774~vacuolar membrane	41	7.56326e-09	1.12449e-05
pink	GOTERM_CC_ALL	GO:0044437~vacuolar part	45	9.83049e-09	1.46158e-05
pink	GOTERM_CC_ALL	GO:0098805~whole membrane	68	1.01531e-08	1.50954e-05
pink	GOTERM_BP_ALL	GO:0043161~proteasome-mediated ubiquitin-dependent protein catabolic process	31	1.07887e-08	2.00855e-05
pink	GOTERM_CC_ALL	GO:0043231~intracellular membrane-bounded organelle	319	1.26681e-08	1.88348e-05
pink	GOTERM_MF_ALL	GO:0005525~GTP binding	31	1.57437e-08	2.45086e-05
pink	GOTERM_BP_ALL	GO:0044267~cellular protein metabolic process	172	1.59553e-08	2.97043e-05
pink	GOTERM_BP_ALL	GO:0006810~transport	165	2.3409e-08	4.35811e-05
pink	GOTERM_BP_ALL	GO:0006996~organelle organization	140	2.37757e-08	4.42638e-05
pink	GOTERM_BP_ALL	GO:0008104~protein localization	102	2.54589e-08	4.73975e-05
pink	GOTERM_BP_ALL	GO:0070647~protein modification by small protein conjugation or removal	56	2.88566e-08	5.37229e-05
pink	GOTERM_BP_ALL	GO:0051234~establishment of localization	167	5.31595e-08	9.89683e-05
pink	GOTERM_BP_ALL	GO:0071702~organic substance transport	107	6.0579e-08	0.000112781
pink	GOTERM_BP_ALL	GO:0030163~protein catabolic process	47	7.24601e-08	0.000134901
pink	GOTERM_MF_ALL	GO:0017076~purine nucleotide binding	83	8.02684e-08	0.000124955
pink	GOTERM_MF_ALL	GO:0035639~purine ribonucleoside triphosphate binding	81	9.57183e-08	0.000149007
pink	GOTERM_BP_ALL	GO:0010256~endomembrane system organization	37	1.01076e-07	0.000188175
pink	GOTERM_MF_ALL	GO:0032550~purine ribonucleoside binding	81	1.18154e-07	0.000183932
pink	GOTERM_MF_ALL	GO:0032549~ribonucleoside binding	81	1.23175e-07	0.00019175
pink	GOTERM_MF_ALL	GO:0001883~purine nucleoside binding	81	1.23175e-07	0.00019175
pink	GOTERM_MF_ALL	GO:0001882~nucleoside binding	81	1.48939e-07	0.000231856
pink	GOTERM_BP_ALL	GO:0044265~cellular macromolecule catabolic process	52	1.78612e-07	0.000332525
pink	GOTERM_BP_ALL	GO:0006464~cellular protein modification process	138	2.31993e-07	0.000431906
pink	GOTERM_BP_ALL	GO:0036211~protein modification process	138	2.31993e-07	0.000431906
pink	GOTERM_CC_ALL	GO:1902494~catalytic complex	55	2.43279e-07	0.000361703
pink	GOTERM_MF_ALL	GO:0032555~purine ribonucleotide binding	81	2.48599e-07	0.000386998
pink	GOTERM_MF_ALL	GO:0003824~catalytic activity	195	2.53464e-07	0.000394572
pink	GOTERM_BP_ALL	GO:0016567~protein ubiquitination	44	3.08551e-07	0.000574435
pink	GOTERM_MF_ALL	GO:0032553~ribonucleotide binding	81	3.54631e-07	0.00055206
pink	GOTERM_MF_ALL	GO:0019003~GDP binding	11	5.39422e-07	0.000839726
pink	GOTERM_CC_ALL	GO:0010008~endosome membrane	29	5.64279e-07	0.000838958
pink	GOTERM_CC_ALL	GO:0005773~vacuole	58	6.37881e-07	0.000948387
pink	GOTERM_CC_ALL	GO:0031982~vesicle	133	6.7177e-07	0.000998772
pink	GOTERM_CC_ALL	GO:0044440~endosomal part	30	8.75626e-07	0.00130186
pink	GOTERM_BP_ALL	GO:0051179~localization	190	9.16144e-07	0.00170559
pink	GOTERM_BP_ALL	GO:0032446~protein modification by small protein conjugation	47	9.37139e-07	0.00174468
pink	GOTERM_MF_ALL	GO:0003924~GTPase activity	21	1.02331e-06	0.001593
pink	GOTERM_BP_ALL	GO:0016192~vesicle-mediated transport	67	1.18173e-06	0.00220002
pink	GOTERM_CC_ALL	GO:1990234~transferase complex	41	1.21941e-06	0.00181299
pink	GOTERM_BP_ALL	GO:0016311~dephosphorylation	29	1.7153e-06	0.00319336
pink	GOTERM_BP_ALL	GO:0019538~protein metabolic process	178	1.76509e-06	0.00328606
pink	GOTERM_BP_ALL	GO:0043412~macromolecule modification	141	1.85419e-06	0.00345194
pink	GOTERM_BP_ALL	GO:0007029~endoplasmic reticulum organization	10	1.91894e-06	0.00357247
pink	GOTERM_CC_ALL	GO:0031988~membrane-bounded vesicle	127	2.0848e-06	0.0030996
pink	GOTERM_CC_ALL	GO:0000151~ubiquitin ligase complex	23	2.39256e-06	0.00355716
pink	GOTERM_MF_ALL	GO:0097367~carbohydrate derivative binding	88	3.0512e-06	0.00474976
pink	GOTERM_CC_ALL	GO:0070062~extracellular exosome	103	5.41021e-06	0.00804351
purple	GOTERM_CC_ALL	GO:0005622~intracellular	263	7.2877e-11	1.03225e-07
purple	GOTERM_CC_ALL	GO:0044424~intracellular part	253	4.03195e-08	5.71098e-05
red	GOTERM_CC_ALL	GO:0044429~mitochondrial part	121	2.90683e-45	4.29998e-42
red	GOTERM_CC_ALL	GO:0005743~mitochondrial inner membrane	88	5.82476e-45	8.61639e-42
red	GOTERM_CC_ALL	GO:0005740~mitochondrial envelope	104	1.69828e-44	2.51221e-41
red	GOTERM_CC_ALL	GO:0005739~mitochondrion	157	4.40926e-44	6.52248e-41
red	GOTERM_CC_ALL	GO:0019866~organelle inner membrane	90	8.22284e-43	1.21638e-39
red	GOTERM_CC_ALL	GO:0031966~mitochondrial membrane	99	1.45885e-42	2.15803e-39
red	GOTERM_CC_ALL	GO:0031967~organelle envelope	112	1.93237e-32	2.8585e-29
red	GOTERM_CC_ALL	GO:0031975~envelope	112	2.85536e-32	4.22384e-29
red	GOTERM_BP_ALL	GO:0007005~mitochondrion organization	82	4.78227e-31	8.88447e-28
red	GOTERM_CC_ALL	GO:0098798~mitochondrial protein complex	42	2.20899e-27	3.26769e-24
red	GOTERM_CC_ALL	GO:0044455~mitochondrial membrane part	45	4.28856e-27	6.34393e-24
red	GOTERM_CC_ALL	GO:0098800~inner mitochondrial membrane protein complex	38	4.92981e-27	7.29251e-24
red	GOTERM_BP_ALL	GO:0070125~mitochondrial translational elongation	31	1.27329e-25	2.36551e-22
red	GOTERM_BP_ALL	GO:0070126~mitochondrial translational termination	31	1.90473e-25	3.53859e-22
red	GOTERM_CC_ALL	GO:0044444~cytoplasmic part	338	2.06938e-25	3.06116e-22
red	KEGG_PATHWAY	hsa05016:Huntington's disease	43	3.92491e-25	4.96258e-22
red	GOTERM_BP_ALL	GO:0006415~translational termination	32	4.43874e-25	8.24627e-22
red	KEGG_PATHWAY	hsa00190:Oxidative phosphorylation	37	5.08624e-25	6.43094e-22
red	GOTERM_CC_ALL	GO:0000313~organellar ribosome	30	5.65176e-25	8.36047e-22
red	GOTERM_CC_ALL	GO:0005761~mitochondrial ribosome	30	5.65176e-25	8.36047e-22
red	GOTERM_BP_ALL	GO:0032543~mitochondrial translation	34	3.10521e-24	5.76883e-21
red	GOTERM_CC_ALL	GO:0043231~intracellular membrane-bounded organelle	405	3.00763e-22	4.4491e-19
red	GOTERM_BP_ALL	GO:0006119~oxidative phosphorylation	31	3.66793e-22	6.81426e-19
red	GOTERM_BP_ALL	GO:0042775~mitochondrial ATP synthesis coupled electron transport	29	4.07654e-22	7.57336e-19
red	GOTERM_BP_ALL	GO:0042773~ATP synthesis coupled electron transport	29	5.70739e-22	1.06031e-18
red	GOTERM_CC_ALL	GO:0005759~mitochondrial matrix	56	5.91977e-22	8.75693e-19
red	GOTERM_BP_ALL	GO:0009199~ribonucleoside triphosphate metabolic process	45	1.33776e-21	2.48528e-18
red	GOTERM_CC_ALL	GO:0044446~intracellular organelle part	332	1.74067e-21	2.57492e-18
red	GOTERM_CC_ALL	GO:0070469~respiratory chain	29	2.27801e-21	3.36979e-18
red	KEGG_PATHWAY	hsa05010:Alzheimer's disease	37	2.9547e-21	3.73586e-18
red	GOTERM_CC_ALL	GO:0043229~intracellular organelle	427	3.08031e-21	4.5566e-18
red	GOTERM_BP_ALL	GO:0009205~purine ribonucleoside triphosphate metabolic process	44	4.05171e-21	7.52723e-18
red	GOTERM_CC_ALL	GO:0044424~intracellular part	463	5.23086e-21	7.73784e-18
red	GOTERM_BP_ALL	GO:0022904~respiratory electron transport chain	30	6.92143e-21	1.28586e-17
red	KEGG_PATHWAY	hsa05012:Parkinson's disease	34	1.05755e-20	1.33714e-17
red	GOTERM_BP_ALL	GO:0009144~purine nucleoside triphosphate metabolic process	44	1.13405e-20	2.10684e-17
red	GOTERM_CC_ALL	GO:0005737~cytoplasm	395	1.19837e-20	1.77271e-17
red	GOTERM_BP_ALL	GO:0022900~electron transport chain	30	1.20703e-20	2.24241e-17
red	GOTERM_CC_ALL	GO:0044422~organelle part	334	2.16142e-20	3.19732e-17
red	GOTERM_BP_ALL	GO:0009116~nucleoside metabolic process	53	2.35892e-20	4.38238e-17
red	GOTERM_BP_ALL	GO:1901564~organonitrogen compound metabolic process	136	3.42495e-20	6.36284e-17
red	GOTERM_BP_ALL	GO:0009141~nucleoside triphosphate metabolic process	45	4.01935e-20	7.46712e-17
red	GOTERM_BP_ALL	GO:0046128~purine ribonucleoside metabolic process	49	4.18092e-20	7.76729e-17
red	GOTERM_BP_ALL	GO:0006414~translational elongation	32	4.37179e-20	8.12188e-17
red	GOTERM_BP_ALL	GO:0046034~ATP metabolic process	41	4.5036e-20	8.36677e-17
red	GOTERM_BP_ALL	GO:0042278~purine nucleoside metabolic process	49	5.9637e-20	1.10793e-16
red	GOTERM_BP_ALL	GO:0009119~ribonucleoside metabolic process	50	1.97902e-19	3.67662e-16
red	GOTERM_CC_ALL	GO:0031090~organelle membrane	151	2.30736e-19	3.41321e-16
red	GOTERM_BP_ALL	GO:1901657~glycosyl compound metabolic process	53	2.39108e-19	4.44214e-16
red	GOTERM_CC_ALL	GO:0000315~organellar large ribosomal subunit	21	3.57439e-19	5.28748e-16
red	GOTERM_CC_ALL	GO:0005762~mitochondrial large ribosomal subunit	21	3.57439e-19	5.28748e-16
red	GOTERM_CC_ALL	GO:0043226~organelle	445	4.69046e-19	6.93845e-16
red	GOTERM_CC_ALL	GO:0005622~intracellular	466	6.24508e-19	9.23815e-16
red	GOTERM_CC_ALL	GO:0005746~mitochondrial respiratory chain	26	6.57432e-19	9.72518e-16
red	GOTERM_CC_ALL	GO:0043227~membrane-bounded organelle	424	7.62479e-19	1.12791e-15
red	GOTERM_BP_ALL	GO:0045333~cellular respiration	34	1.08296e-18	2.01192e-15
red	GOTERM_CC_ALL	GO:0098803~respiratory chain complex	25	1.53787e-18	2.27492e-15
red	GOTERM_BP_ALL	GO:0009123~nucleoside monophosphate metabolic process	44	1.56542e-18	2.90822e-15
red	GOTERM_BP_ALL	GO:0009161~ribonucleoside monophosphate metabolic process	43	1.71593e-18	3.18785e-15
red	GOTERM_BP_ALL	GO:0009167~purine ribonucleoside monophosphate metabolic process	42	2.37264e-18	4.40788e-15
red	GOTERM_BP_ALL	GO:0009126~purine nucleoside monophosphate metabolic process	42	2.69889e-18	5.01398e-15
red	GOTERM_BP_ALL	GO:0043624~cellular protein complex disassembly	33	2.95187e-16	6.21725e-13
red	GOTERM_BP_ALL	GO:0043241~protein complex disassembly	37	4.81465e-16	8.21565e-13
red	GOTERM_CC_ALL	GO:0005840~ribosome	37	5.7954e-16	8.21565e-13
red	KEGG_PATHWAY	hsa04932:Non-alcoholic fatty liver disease (NAFLD)	30	7.72712e-16	9.88098e-13
red	GOTERM_BP_ALL	GO:0032984~macromolecular complex disassembly	37	1.50801e-15	2.88658e-12
red	GOTERM_BP_ALL	GO:0033108~mitochondrial respiratory chain complex assembly	23	2.81928e-15	5.15143e-12
red	GOTERM_MF_ALL	GO:0003954~NADH dehydrogenase activity	18	4.39922e-15	6.77236e-12
red	GOTERM_MF_ALL	GO:0050136~NADH dehydrogenase (quinone) activity	18	4.39922e-15	6.77236e-12
red	GOTERM_MF_ALL	GO:0008137~NADH dehydrogenase (ubiquinone) activity	18	4.39922e-15	6.77236e-12
red	GOTERM_BP_ALL	GO:0009117~nucleotide metabolic process	59	6.55183e-15	1.2168e-11
red	GOTERM_BP_ALL	GO:0055086~nucleobase-containing small molecule metabolic process	62	6.78827e-15	1.25788e-11
red	GOTERM_CC_ALL	GO:0044391~ribosomal subunit	31	8.06186e-15	1.19904e-11
red	GOTERM_BP_ALL	GO:0006753~nucleoside phosphate metabolic process	59	1.12097e-14	2.08278e-11
red	GOTERM_CC_ALL	GO:0015934~large ribosomal subunit	25	1.39344e-14	2.06946e-11
red	GOTERM_BP_ALL	GO:0015980~energy derivation by oxidation of organic compounds	36	2.59031e-14	4.80616e-11
red	GOTERM_BP_ALL	GO:0006120~mitochondrial electron transport, NADH to ubiquinone	18	2.98564e-14	5.54778e-11
red	GOTERM_BP_ALL	GO:0072521~purine-containing compound metabolic process	53	3.97859e-14	7.38409e-11
red	GOTERM_BP_ALL	GO:0032981~mitochondrial respiratory chain complex I assembly	19	5.04403e-14	9.36362e-11
red	GOTERM_BP_ALL	GO:0097031~mitochondrial respiratory chain complex I biogenesis	19	5.04403e-14	9.36362e-11
red	GOTERM_BP_ALL	GO:0010257~NADH dehydrogenase complex assembly	19	5.04403e-14	9.36362e-11
red	GOTERM_BP_ALL	GO:0006163~purine nucleotide metabolic process	51	8.49835e-14	1.57785e-10
red	GOTERM_BP_ALL	GO:0019693~ribose phosphate metabolic process	51	9.76016e-14	1.81299e-10
red	GOTERM_CC_ALL	GO:0005747~mitochondrial respiratory chain complex I	17	1.2959e-13	1.91658e-10
red	GOTERM_CC_ALL	GO:0030964~NADH dehydrogenase complex	17	1.2959e-13	1.91658e-10
red	GOTERM_CC_ALL	GO:0045271~respiratory chain complex I	17	1.2959e-13	1.91658e-10
red	KEGG_PATHWAY	hsa01100:Metabolic pathways	83	1.42078e-13	1.79678e-10
red	GOTERM_BP_ALL	GO:0009259~ribonucleotide metabolic process	50	1.42343e-13	2.64422e-10
red	GOTERM_BP_ALL	GO:0009150~purine ribonucleotide metabolic process	49	1.91414e-13	3.55582e-10
red	GOTERM_BP_ALL	GO:0006091~generation of precursor metabolites and energy	41	3.12846e-13	5.81235e-10
red	GOTERM_MF_ALL	GO:0016655~oxidoreductase activity, acting on NAD(P)H, quinone or similar compound as acceptor	18	5.35306e-13	8.16935e-10
red	GOTERM_MF_ALL	GO:0003735~structural constituent of ribosome	31	5.72891e-13	8.74201e-10
red	GOTERM_BP_ALL	GO:1901566~organonitrogen compound biosynthetic process	85	2.45094e-12	4.55331e-09
red	GOTERM_CC_ALL	GO:0030529~intracellular ribonucleoprotein complex	60	2.65565e-12	3.92842e-09
red	GOTERM_CC_ALL	GO:1990904~ribonucleoprotein complex	60	2.78905e-12	4.12583e-09
red	GOTERM_CC_ALL	GO:0032991~macromolecular complex	205	5.87995e-12	8.69804e-09
red	GOTERM_MF_ALL	GO:0016651~oxidoreductase activity, acting on NAD(P)H	20	9.26438e-11	1.41373e-07
red	GOTERM_BP_ALL	GO:0022411~cellular component disassembly	43	1.55097e-10	2.88139e-07
red	GOTERM_BP_ALL	GO:1902600~hydrogen ion transmembrane transport	20	2.50557e-10	4.65483e-07
red	GOTERM_BP_ALL	GO:0019637~organophosphate metabolic process	69	3.53197e-10	6.56168e-07
red	GOTERM_BP_ALL	GO:1901135~carbohydrate derivative metabolic process	74	5.98354e-10	1.11162e-06
red	GOTERM_BP_ALL	GO:1990542~mitochondrial transmembrane transport	16	7.17665e-10	1.33327e-06
red	GOTERM_BP_ALL	GO:0044281~small molecule metabolic process	100	8.94915e-10	1.66257e-06
red	GOTERM_CC_ALL	GO:1990204~oxidoreductase complex	19	8.96381e-10	1.32599e-06
red	GOTERM_CC_ALL	GO:0031974~membrane-enclosed lumen	184	9.81966e-10	1.45259e-06
red	GOTERM_BP_ALL	GO:0043604~amide biosynthetic process	52	1.31547e-09	2.44387e-06
red	GOTERM_BP_ALL	GO:0034641~cellular nitrogen compound metabolic process	243	1.51887e-09	2.82174e-06
red	GOTERM_MF_ALL	GO:0015078~hydrogen ion transmembrane transporter activity	19	1.81987e-09	2.77709e-06
red	GOTERM_BP_ALL	GO:0006412~translation	47	2.9931e-09	5.56057e-06
red	GOTERM_BP_ALL	GO:0043043~peptide biosynthetic process	48	3.57211e-09	6.63624e-06
red	GOTERM_BP_ALL	GO:0006518~peptide metabolic process	54	6.23736e-09	1.15877e-05
red	GOTERM_BP_ALL	GO:0044237~cellular metabolic process	340	7.8138e-09	1.45164e-05
red	GOTERM_BP_ALL	GO:0043603~cellular amide metabolic process	61	8.15898e-09	1.51577e-05
red	GOTERM_BP_ALL	GO:0071822~protein complex subunit organization	87	8.42973e-09	1.56607e-05
red	GOTERM_CC_ALL	GO:0070013~intracellular organelle lumen	175	1.77555e-08	2.62652e-05
red	GOTERM_CC_ALL	GO:0043233~organelle lumen	177	1.99649e-08	2.95334e-05
red	KEGG_PATHWAY	hsa03010:Ribosome	20	2.52112e-08	3.18765e-05
red	GOTERM_BP_ALL	GO:0006807~nitrogen compound metabolic process	250	3.32885e-08	6.18431e-05
red	GOTERM_BP_ALL	GO:0009201~ribonucleoside triphosphate biosynthetic process	14	3.54725e-08	6.59006e-05
red	GOTERM_BP_ALL	GO:0008152~metabolic process	359	4.34845e-08	8.07853e-05
red	GOTERM_BP_ALL	GO:0015992~proton transport	20	4.44772e-08	8.26294e-05
red	GOTERM_BP_ALL	GO:0015985~energy coupled proton transport, down electrochemical gradient	10	5.22696e-08	9.71061e-05
red	GOTERM_BP_ALL	GO:0015986~ATP synthesis coupled proton transport	10	5.22696e-08	9.71061e-05
red	GOTERM_BP_ALL	GO:0006818~hydrogen transport	20	5.49612e-08	0.000102106
red	GOTERM_BP_ALL	GO:0009206~purine ribonucleoside triphosphate biosynthetic process	13	1.03608e-07	0.000192482
red	GOTERM_BP_ALL	GO:0009145~purine nucleoside triphosphate biosynthetic process	13	1.24828e-07	0.000231905
red	GOTERM_BP_ALL	GO:0055114~oxidation-reduction process	57	1.89316e-07	0.000351709
red	GOTERM_BP_ALL	GO:0009142~nucleoside triphosphate biosynthetic process	14	2.63743e-07	0.00048998
red	GOTERM_BP_ALL	GO:0006996~organelle organization	151	2.92309e-07	0.000543048
red	GOTERM_MF_ALL	GO:0016491~oxidoreductase activity	47	4.25064e-07	0.000648637
red	GOTERM_BP_ALL	GO:0046129~purine ribonucleoside biosynthetic process	15	6.11272e-07	0.00113561
red	GOTERM_BP_ALL	GO:0042451~purine nucleoside biosynthetic process	15	6.11272e-07	0.00113561
red	GOTERM_BP_ALL	GO:0006839~mitochondrial transport	25	7.88801e-07	0.00146542
red	GOTERM_MF_ALL	GO:0009055~electron carrier activity	16	9.56173e-07	0.00145909
red	GOTERM_BP_ALL	GO:0042776~mitochondrial ATP synthesis coupled proton transport	8	9.63069e-07	0.00178917
red	GOTERM_BP_ALL	GO:0042455~ribonucleoside biosynthetic process	16	9.67157e-07	0.00179676
red	GOTERM_CC_ALL	GO:0005753~mitochondrial proton-transporting ATP synthase complex	8	2.6943e-06	0.00398553
red	GOTERM_BP_ALL	GO:0009163~nucleoside biosynthetic process	16	2.7167e-06	0.00504695
red	GOTERM_BP_ALL	GO:1901659~glycosyl compound biosynthetic process	16	3.29794e-06	0.00612671
red	GOTERM_CC_ALL	GO:0045259~proton-transporting ATP synthase complex	8	3.65347e-06	0.00540433
red	GOTERM_MF_ALL	GO:0046933~proton-transporting ATP synthase activity, rotational mechanism	7	4.04381e-06	0.0061706
red	GOTERM_BP_ALL	GO:0071704~organic substance metabolic process	341	4.57397e-06	0.00849714
salmon	GOTERM_CC_ALL	GO:0044456~synapse part	36	1.24924e-12	1.76135e-09
salmon	GOTERM_CC_ALL	GO:0045202~synapse	39	7.66231e-12	1.08035e-08
salmon	GOTERM_CC_ALL	GO:0097458~neuron part	53	1.17996e-11	1.66368e-08
salmon	GOTERM_CC_ALL	GO:0098793~presynapse	20	1.93494e-08	2.72817e-05
salmon	GOTERM_BP_ALL	GO:0051239~regulation of multicellular organismal process	74	2.41151e-08	4.47534e-05
salmon	GOTERM_MF_ALL	GO:0022843~voltage-gated cation channel activity	14	4.77135e-08	7.23985e-05
salmon	GOTERM_MF_ALL	GO:0022836~gated channel activity	21	5.50211e-08	8.34868e-05
salmon	GOTERM_MF_ALL	GO:0005216~ion channel activity	23	1.79384e-07	0.00027219
salmon	GOTERM_BP_ALL	GO:0007399~nervous system development	62	2.3212e-07	0.000430773
salmon	GOTERM_MF_ALL	GO:0022838~substrate-specific channel activity	23	3.36177e-07	0.0005101
salmon	GOTERM_MF_ALL	GO:0005261~cation channel activity	19	3.38523e-07	0.00051366
salmon	GOTERM_CC_ALL	GO:0036477~somatodendritic compartment	28	7.33848e-07	0.00103468
salmon	GOTERM_CC_ALL	GO:0030425~dendrite	23	7.69385e-07	0.00108479
salmon	GOTERM_BP_ALL	GO:0099537~trans-synaptic signaling	27	8.53662e-07	0.00158423
salmon	GOTERM_BP_ALL	GO:0098916~anterograde trans-synaptic signaling	27	8.53662e-07	0.00158423
salmon	GOTERM_BP_ALL	GO:0007268~chemical synaptic transmission	27	8.53662e-07	0.00158423
salmon	GOTERM_BP_ALL	GO:0099536~synaptic signaling	27	8.53662e-07	0.00158423
salmon	GOTERM_MF_ALL	GO:0015267~channel activity	23	1.11739e-06	0.00169547
salmon	GOTERM_MF_ALL	GO:0022803~passive transmembrane transporter activity	23	1.15641e-06	0.00175467
salmon	GOTERM_CC_ALL	GO:0098794~postsynapse	20	1.65628e-06	0.00233525
salmon	GOTERM_MF_ALL	GO:0046873~metal ion transmembrane transporter activity	21	2.24929e-06	0.00341292
salmon	GOTERM_MF_ALL	GO:0005244~voltage-gated ion channel activity	14	2.76297e-06	0.00419234
salmon	GOTERM_MF_ALL	GO:0022832~voltage-gated channel activity	14	2.76297e-06	0.00419234
salmon	GOTERM_BP_ALL	GO:0023061~signal release	21	3.35698e-06	0.00622979
salmon	GOTERM_BP_ALL	GO:0034220~ion transmembrane transport	34	4.30118e-06	0.00798194
salmon	GOTERM_MF_ALL	GO:0005249~voltage-gated potassium channel activity	10	4.36186e-06	0.0066183
skyblue	GOTERM_MF_ALL	GO:0000981~RNA polymerase II transcription factor activity, sequence-specific DNA binding	11	8.19135e-08	0.00010573
skyblue	GOTERM_MF_ALL	GO:0003700~transcription factor activity, sequence-specific DNA binding	13	3.46554e-07	0.000447313
skyblue	GOTERM_MF_ALL	GO:0001071~nucleic acid binding transcription factor activity	13	3.49616e-07	0.000451266
skyblue	GOTERM_MF_ALL	GO:0043565~sequence-specific DNA binding	11	7.1963e-06	0.00928823
tan	GOTERM_BP_ALL	GO:0006614~SRP-dependent cotranslational protein targeting to membrane	72	9.18464e-109	1.65188e-105
tan	GOTERM_BP_ALL	GO:0006613~cotranslational protein targeting to membrane	73	2.75296e-107	4.95127e-104
tan	GOTERM_BP_ALL	GO:0045047~protein targeting to ER	72	1.54278e-104	2.77472e-101
tan	GOTERM_BP_ALL	GO:0006413~translational initiation	86	1.04036e-103	1.87111e-100
tan	GOTERM_BP_ALL	GO:0072599~establishment of protein localization to endoplasmic reticulum	72	1.19118e-102	2.14236e-99
tan	GOTERM_BP_ALL	GO:0000184~nuclear-transcribed mRNA catabolic process, nonsense-mediated decay	73	1.39779e-98	2.51397e-95
tan	GOTERM_CC_ALL	GO:0022626~cytosolic ribosome	72	5.9256e-97	8.54504e-94
tan	GOTERM_BP_ALL	GO:0070972~protein localization to endoplasmic reticulum	73	9.10042e-97	1.63673e-93
tan	GOTERM_BP_ALL	GO:0000956~nuclear-transcribed mRNA catabolic process	78	8.83731e-86	1.58941e-82
tan	GOTERM_BP_ALL	GO:0019080~viral gene expression	76	3.22459e-85	5.79949e-82
tan	GOTERM_BP_ALL	GO:0006364~rRNA processing	84	1.35414e-84	2.43545e-81
tan	GOTERM_CC_ALL	GO:0044391~ribosomal subunit	74	1.41393e-83	2.03897e-80
tan	GOTERM_BP_ALL	GO:0016072~rRNA metabolic process	84	1.57653e-83	2.83542e-80
tan	GOTERM_BP_ALL	GO:0006402~mRNA catabolic process	78	5.9507e-83	1.07025e-79
tan	KEGG_PATHWAY	hsa03010:Ribosome	72	3.68772e-82	4.35658e-79
tan	GOTERM_BP_ALL	GO:0044033~multi-organism metabolic process	76	6.18006e-81	1.1115e-77
tan	GOTERM_BP_ALL	GO:0019083~viral transcription	72	1.14184e-80	2.05362e-77
tan	GOTERM_BP_ALL	GO:0006612~protein targeting to membrane	73	1.60723e-80	2.89064e-77
tan	GOTERM_CC_ALL	GO:0030529~intracellular ribonucleoprotein complex	115	3.52577e-80	5.08435e-77
tan	GOTERM_CC_ALL	GO:1990904~ribonucleoprotein complex	115	4.08186e-80	5.88627e-77
tan	GOTERM_BP_ALL	GO:0022613~ribonucleoprotein complex biogenesis	98	4.1335e-80	7.43419e-77
tan	GOTERM_BP_ALL	GO:0034470~ncRNA processing	93	4.99239e-80	8.97893e-77
tan	GOTERM_BP_ALL	GO:0006412~translation	108	6.98956e-80	1.25709e-76
tan	GOTERM_BP_ALL	GO:0006401~RNA catabolic process	78	2.82087e-78	5.0734e-75
tan	GOTERM_BP_ALL	GO:0043043~peptide biosynthetic process	108	5.50626e-78	9.90313e-75
tan	GOTERM_CC_ALL	GO:0005840~ribosome	77	2.67461e-77	3.85694e-74
tan	GOTERM_BP_ALL	GO:0042254~ribosome biogenesis	85	3.8994e-77	7.01316e-74
tan	GOTERM_CC_ALL	GO:0044445~cytosolic part	75	2.63907e-76	3.80568e-73
tan	GOTERM_MF_ALL	GO:0003735~structural constituent of ribosome	73	6.9844e-74	1.03154e-70
tan	GOTERM_BP_ALL	GO:0043604~amide biosynthetic process	108	2.41494e-73	4.34332e-70
tan	GOTERM_BP_ALL	GO:0034660~ncRNA metabolic process	98	1.51911e-72	2.73216e-69
tan	GOTERM_BP_ALL	GO:0006518~peptide metabolic process	109	1.35333e-69	2.43399e-66
tan	GOTERM_BP_ALL	GO:0006396~RNA processing	113	3.92414e-69	7.05765e-66
tan	GOTERM_BP_ALL	GO:0034655~nucleobase-containing compound catabolic process	81	1.08765e-66	1.95617e-63
tan	GOTERM_MF_ALL	GO:0003723~RNA binding	141	7.96564e-66	1.17646e-62
tan	GOTERM_BP_ALL	GO:0044270~cellular nitrogen compound catabolic process	82	1.71474e-64	3.084e-61
tan	GOTERM_BP_ALL	GO:0043603~cellular amide metabolic process	112	7.17466e-64	1.29038e-60
tan	GOTERM_BP_ALL	GO:0046700~heterocycle catabolic process	81	8.20298e-64	1.47533e-60
tan	GOTERM_BP_ALL	GO:0019439~aromatic compound catabolic process	81	9.11135e-63	1.6387e-59
tan	GOTERM_BP_ALL	GO:0016071~mRNA metabolic process	95	5.16795e-62	9.29468e-59
tan	GOTERM_BP_ALL	GO:1901361~organic cyclic compound catabolic process	81	6.14544e-61	1.10527e-57
tan	GOTERM_BP_ALL	GO:0019058~viral life cycle	80	6.67009e-59	1.19963e-55
tan	GOTERM_BP_ALL	GO:0090150~establishment of protein localization to membrane	74	1.38851e-58	2.49727e-55
tan	GOTERM_CC_ALL	GO:0022625~cytosolic large ribosomal subunit	42	3.48224e-57	5.02158e-54
tan	GOTERM_BP_ALL	GO:1901566~organonitrogen compound biosynthetic process	117	7.87642e-54	1.41659e-50
tan	GOTERM_MF_ALL	GO:0044822~poly(A) RNA binding	111	3.63698e-53	5.37155e-50
tan	GOTERM_BP_ALL	GO:0072657~protein localization to membrane	74	2.31811e-49	4.16918e-46
tan	GOTERM_CC_ALL	GO:0015934~large ribosomal subunit	43	6.30003e-46	9.085e-43
tan	GOTERM_BP_ALL	GO:0072594~establishment of protein localization to organelle	80	6.37065e-46	1.14578e-42
tan	GOTERM_BP_ALL	GO:0006605~protein targeting	81	2.93977e-45	5.28725e-42
tan	GOTERM_BP_ALL	GO:0016032~viral process	92	7.13613e-45	1.28345e-41
tan	GOTERM_CC_ALL	GO:0032991~macromolecular complex	191	9.04738e-45	1.30468e-41
tan	GOTERM_BP_ALL	GO:0044764~multi-organism cellular process	92	1.30917e-44	2.35457e-41
tan	GOTERM_BP_ALL	GO:0044403~symbiosis, encompassing mutualism through parasitism	92	1.0962e-43	1.97154e-40
tan	GOTERM_BP_ALL	GO:0044419~interspecies interaction between organisms	92	1.0962e-43	1.97154e-40
tan	GOTERM_BP_ALL	GO:0044265~cellular macromolecule catabolic process	90	1.22761e-42	2.20788e-39
tan	GOTERM_BP_ALL	GO:1902582~single-organism intracellular transport	78	1.63291e-42	2.93682e-39
tan	GOTERM_BP_ALL	GO:1901564~organonitrogen compound metabolic process	130	2.25728e-42	4.05976e-39
tan	GOTERM_BP_ALL	GO:0033365~protein localization to organelle	86	1.14407e-41	2.05764e-38
tan	GOTERM_CC_ALL	GO:0022627~cytosolic small ribosomal subunit	30	1.21288e-40	1.74903e-37
tan	GOTERM_BP_ALL	GO:0006886~intracellular protein transport	89	3.47335e-40	6.24689e-37
tan	GOTERM_MF_ALL	GO:0003676~nucleic acid binding	172	2.15034e-38	3.17589e-35
tan	GOTERM_BP_ALL	GO:0046907~intracellular transport	106	5.63286e-38	1.01308e-34
tan	GOTERM_BP_ALL	GO:0009057~macromolecule catabolic process	93	6.14589e-38	1.10535e-34
tan	GOTERM_BP_ALL	GO:0044802~single-organism membrane organization	80	1.70942e-37	3.07444e-34
tan	GOTERM_BP_ALL	GO:0034641~cellular nitrogen compound metabolic process	212	1.83621e-37	3.30246e-34
tan	GOTERM_BP_ALL	GO:0006807~nitrogen compound metabolic process	217	5.00937e-36	9.00947e-33
tan	GOTERM_CC_ALL	GO:0015935~small ribosomal subunit	31	1.77053e-35	2.5532e-32
tan	GOTERM_MF_ALL	GO:0005198~structural molecule activity	75	2.72818e-35	4.02932e-32
tan	GOTERM_CC_ALL	GO:0044446~intracellular organelle part	231	4.0024e-34	5.77168e-31
tan	GOTERM_BP_ALL	GO:0061024~membrane organization	82	6.43642e-34	1.15761e-30
tan	GOTERM_BP_ALL	GO:0010467~gene expression	186	7.37669e-34	1.32671e-30
tan	GOTERM_CC_ALL	GO:0005829~cytosol	144	2.78644e-33	4.0182e-30
tan	GOTERM_CC_ALL	GO:0044422~organelle part	231	2.2521e-32	3.24765e-29
tan	GOTERM_BP_ALL	GO:0090304~nucleic acid metabolic process	180	8.85188e-32	1.59203e-28
tan	GOTERM_CC_ALL	GO:0044428~nuclear part	153	4.36968e-31	6.30133e-28
tan	GOTERM_CC_ALL	GO:0070013~intracellular organelle lumen	160	4.82268e-31	6.95458e-28
tan	GOTERM_BP_ALL	GO:0034613~cellular protein localization	97	5.11292e-31	9.19569e-28
tan	GOTERM_BP_ALL	GO:1902580~single-organism cellular localization	81	5.9246e-31	1.06555e-27
tan	GOTERM_CC_ALL	GO:0043233~organelle lumen	161	8.88561e-31	1.28136e-27
tan	GOTERM_BP_ALL	GO:0070727~cellular macromolecule localization	97	9.74412e-31	1.7525e-27
tan	GOTERM_CC_ALL	GO:0031974~membrane-enclosed lumen	162	1.06542e-30	1.53639e-27
tan	GOTERM_BP_ALL	GO:0044248~cellular catabolic process	97	1.12968e-30	2.03176e-27
tan	GOTERM_BP_ALL	GO:0044085~cellular component biogenesis	131	1.51553e-30	2.72571e-27
tan	GOTERM_BP_ALL	GO:0006139~nucleobase-containing compound metabolic process	189	3.23567e-30	5.81943e-27
tan	GOTERM_BP_ALL	GO:0051649~establishment of localization in cell	107	5.95482e-30	1.07099e-26
tan	GOTERM_CC_ALL	GO:0031981~nuclear lumen	142	2.18497e-29	3.15085e-26
tan	GOTERM_BP_ALL	GO:0034645~cellular macromolecule biosynthetic process	173	3.51907e-29	6.32913e-26
tan	GOTERM_BP_ALL	GO:0046483~heterocycle metabolic process	189	6.87887e-29	1.23718e-25
tan	GOTERM_BP_ALL	GO:0044271~cellular nitrogen compound biosynthetic process	171	1.00265e-28	1.80328e-25
tan	GOTERM_BP_ALL	GO:1901575~organic substance catabolic process	102	1.04861e-28	1.88596e-25
tan	GOTERM_BP_ALL	GO:0006725~cellular aromatic compound metabolic process	189	2.0664e-28	3.71647e-25
tan	GOTERM_BP_ALL	GO:0009059~macromolecule biosynthetic process	174	5.76932e-28	1.03763e-24
tan	GOTERM_BP_ALL	GO:1901360~organic cyclic compound metabolic process	191	1.02757e-27	1.84811e-24
tan	GOTERM_BP_ALL	GO:0016070~RNA metabolic process	163	2.01036e-27	3.61567e-24
tan	GOTERM_CC_ALL	GO:0043228~non-membrane-bounded organelle	147	5.57117e-27	8.03394e-24
tan	GOTERM_CC_ALL	GO:0043232~intracellular non-membrane-bounded organelle	147	5.57117e-27	8.03394e-24
tan	GOTERM_BP_ALL	GO:0009056~catabolic process	102	1.67454e-26	3.01169e-23
tan	GOTERM_BP_ALL	GO:0044260~cellular macromolecule metabolic process	223	8.07594e-26	1.45248e-22
tan	GOTERM_BP_ALL	GO:0051641~cellular localization	113	5.6435e-25	1.015e-21
tan	GOTERM_CC_ALL	GO:0005912~adherens junction	57	2.12503e-24	3.06441e-21
tan	GOTERM_MF_ALL	GO:1901363~heterocyclic compound binding	185	3.74794e-24	5.53542e-21
tan	GOTERM_BP_ALL	GO:0044249~cellular biosynthetic process	184	4.45491e-24	8.01225e-21
tan	GOTERM_BP_ALL	GO:0015031~protein transport	94	5.15412e-24	9.26979e-21
tan	GOTERM_CC_ALL	GO:0005634~nucleus	196	6.68906e-24	9.646e-21
tan	GOTERM_CC_ALL	GO:0070161~anchoring junction	57	6.94797e-24	1.00194e-20
tan	GOTERM_CC_ALL	GO:0005730~nucleolus	63	7.80045e-24	1.12487e-20
tan	GOTERM_MF_ALL	GO:0019843~rRNA binding	23	8.13944e-24	1.20213e-20
tan	GOTERM_MF_ALL	GO:0097159~organic cyclic compound binding	185	2.1821e-23	3.22279e-20
tan	GOTERM_BP_ALL	GO:0009058~biosynthetic process	186	2.74636e-23	4.9394e-20
tan	GOTERM_BP_ALL	GO:0051704~multi-organism process	105	3.72345e-23	6.69672e-20
tan	GOTERM_CC_ALL	GO:0043229~intracellular organelle	263	4.40444e-23	6.35144e-20
tan	GOTERM_CC_ALL	GO:0005925~focal adhesion	43	4.45795e-23	6.42862e-20
tan	GOTERM_BP_ALL	GO:1901576~organic substance biosynthetic process	184	4.49343e-23	8.08154e-20
tan	GOTERM_CC_ALL	GO:0005924~cell-substrate adherens junction	43	6.00197e-23	8.65517e-20
tan	GOTERM_CC_ALL	GO:0030055~cell-substrate junction	43	9.79346e-23	1.41227e-19
tan	GOTERM_BP_ALL	GO:0045184~establishment of protein localization	95	4.88035e-22	8.77743e-19
tan	GOTERM_BP_ALL	GO:0044267~cellular protein metabolic process	157	1.4938e-21	2.68663e-18
tan	GOTERM_BP_ALL	GO:0043170~macromolecule metabolic process	226	2.13532e-21	3.84041e-18
tan	GOTERM_CC_ALL	GO:0044444~cytoplasmic part	207	3.82061e-21	5.50954e-18
tan	GOTERM_BP_ALL	GO:0044238~primary metabolic process	240	6.69182e-21	1.20354e-17
tan	GOTERM_CC_ALL	GO:0005654~nucleoplasm	114	6.74885e-21	9.73221e-18
tan	GOTERM_BP_ALL	GO:0022618~ribonucleoprotein complex assembly	32	1.05749e-20	1.90192e-17
tan	GOTERM_BP_ALL	GO:0044237~cellular metabolic process	239	1.29682e-20	2.33236e-17
tan	GOTERM_BP_ALL	GO:0008104~protein localization	103	1.51758e-20	2.72941e-17
tan	GOTERM_CC_ALL	GO:0044424~intracellular part	277	1.81054e-20	2.6109e-17
tan	GOTERM_BP_ALL	GO:0071826~ribonucleoprotein complex subunit organization	32	4.85052e-20	8.72376e-17
tan	GOTERM_CC_ALL	GO:0043227~membrane-bounded organelle	259	1.3324e-19	1.92139e-16
tan	GOTERM_CC_ALL	GO:0005622~intracellular	279	1.59513e-19	2.30027e-16
tan	GOTERM_CC_ALL	GO:0043226~organelle	269	1.71892e-19	2.47878e-16
tan	GOTERM_BP_ALL	GO:0071704~organic substance metabolic process	243	3.41557e-19	6.14299e-16
tan	GOTERM_CC_ALL	GO:0043231~intracellular membrane-bounded organelle	244	4.58465e-19	6.61132e-16
tan	GOTERM_BP_ALL	GO:0034654~nucleobase-containing compound biosynthetic process	141	7.0004e-19	1.25904e-15
tan	GOTERM_BP_ALL	GO:0019538~protein metabolic process	161	1.79067e-18	3.22056e-15
tan	GOTERM_BP_ALL	GO:0018130~heterocycle biosynthetic process	141	2.21725e-18	3.98778e-15
tan	GOTERM_BP_ALL	GO:0019438~aromatic compound biosynthetic process	141	2.91587e-18	5.24425e-15
tan	GOTERM_CC_ALL	GO:0005737~cytoplasm	239	3.56011e-18	5.13388e-15
tan	GOTERM_BP_ALL	GO:0033036~macromolecule localization	107	3.85137e-18	6.92678e-15
tan	GOTERM_BP_ALL	GO:1901362~organic cyclic compound biosynthetic process	142	1.00668e-17	1.81053e-14
tan	GOTERM_BP_ALL	GO:0008152~metabolic process	245	1.08826e-17	1.95726e-14
tan	GOTERM_BP_ALL	GO:0071840~cellular component organization or biogenesis	173	2.10273e-17	3.78181e-14
tan	GOTERM_BP_ALL	GO:0032774~RNA biosynthetic process	128	4.71705e-17	8.48372e-14
tan	GOTERM_BP_ALL	GO:0042255~ribosome assembly	18	5.98718e-17	1.9984e-13
tan	GOTERM_BP_ALL	GO:0002181~cytoplasmic translation	17	1.61704e-16	1.9984e-13
tan	GOTERM_BP_ALL	GO:0042273~ribosomal large subunit biogenesis	18	4.67142e-16	7.99361e-13
tan	GOTERM_BP_ALL	GO:0010608~posttranscriptional regulation of gene expression	39	5.14219e-16	9.99201e-13
tan	GOTERM_BP_ALL	GO:0071702~organic substance transport	98	2.3408e-15	4.19664e-12
tan	GOTERM_CC_ALL	GO:0070062~extracellular exosome	99	2.69762e-15	3.84137e-12
tan	GOTERM_CC_ALL	GO:1903561~extracellular vesicle	99	3.8284e-15	5.44009e-12
tan	GOTERM_CC_ALL	GO:0043230~extracellular organelle	99	3.88616e-15	5.60663e-12
tan	GOTERM_BP_ALL	GO:0042274~ribosomal small subunit biogenesis	17	1.33113e-14	2.39586e-11
tan	GOTERM_BP_ALL	GO:0016043~cellular component organization	163	4.10248e-14	7.38853e-11
tan	GOTERM_BP_ALL	GO:0006417~regulation of translation	30	5.32318e-13	9.57445e-10
tan	GOTERM_CC_ALL	GO:0030054~cell junction	60	1.38154e-12	1.99228e-09
tan	GOTERM_BP_ALL	GO:0034248~regulation of cellular amide metabolic process	30	4.61614e-12	8.30214e-09
tan	GOTERM_MF_ALL	GO:0008135~translation factor activity, RNA binding	18	7.81085e-12	1.1536e-08
tan	GOTERM_MF_ALL	GO:0005515~protein binding	235	1.05652e-11	1.5604e-08
tan	GOTERM_CC_ALL	GO:0031988~membrane-bounded vesicle	107	1.13188e-11	1.63224e-08
tan	GOTERM_CC_ALL	GO:0031982~vesicle	107	1.2615e-10	1.81915e-07
tan	GOTERM_BP_ALL	GO:0034622~cellular macromolecular complex assembly	47	2.47543e-10	4.45212e-07
tan	GOTERM_BP_ALL	GO:0006810~transport	125	8.30805e-10	1.49422e-06
[truncated: 393 more rows]

## Sheet: Table S2_2
Supplemental Table S2. Gene and moduleColor identified by weighted gene co-expression network analysis (WGCNA).
Gene_Symbol	moduleColor
LYPLAL1	black
HNMT	black
GSTM3	black
COQ6	black
KRCC1	black
TMBIM4	black
ZCCHC9	black
SMPDL3A	black
AIG1	black
SH3BGRL	black
RER1	black
PEX2	black
C10orf107	black
MTERFD3	black
UBE2A	black
RP11-622K12.1	black
SPCS1	black
MITD1	black
CYB5A	black
FRA10AC1	black
SPTSSA	black
DNAJC15	black
MRPS14	black
TTC32	black
PPM1M	black
MRPL18	black
NMU	black
C15orf24	black
NSL1	black
CENPQ	black
HSD17B11	black
AMZ2	black
HOPX	black
KCP	black
PSPH	black
RMND5B	black
TOMM40L	black
UBXN8	black
RNF39	black
MRPS28	black
SNX3	black
ETFA	black
LYRM5	black
METTL23	black
VIP	black
SPAG16	black
CCDC160	black
NIT2	black
PIGB	black
CLYBL	black
ITM2B	black
ADK	black
PPP2CB	black
HMGN3	black
TMEM22	black
TCEAL1	black
GPR34	black
REXO2	black
PEX7	black
TMEM14B	black
BRP44L	black
C1QTNF2	black
FAIM	black
HRASLS	black
CGRRF1	black
COA5	black
LY96	black
C20orf106	black
UNC50	black
CEPT1	black
GLO1	black
C1orf51	black
IMMP1L	black
TM2D1	black
C18orf32	black
CRIPT	black
MNAT1	black
AC008073.6	black
ALG5	black
SDHD	black
SMUG1	black
MRPS25	black
MTFMT	black
UROS	black
PDF	black
PDZD11	black
CREG1	black
UBL5	black
LXN	black
TMEM165	black
CCBL2	black
PHYH	black
RTN4IP1	black
N4BP2L1	black
NAA20	black
PIH1D2	black
SAP18	black
TAMM41	black
GMNN	black
DYNC2LI1	black
RNF7	black
RDH11	black
DUSP28	black
XRCC6BP1	black
SUCLG1	black
CREM	black
TXNDC15	black
BRP44	black
PPA2	black
BBS4	black
XBP1	black
SYNPR	black
ERO1LB	black
HACL1	black
HIST1H2BK	black
MRPL46	black
CAP1	black
RABGGTB	black
KRT10	black
C5orf35	black
TAF1D	black
DNAJC25-GNG10	black
TMEM50B	black
AC018926.1	black
NME5	black
DNAJC25	black
EFHA1	black
ITGB1BP1	black
CITED1	black
C8orf40	black
TCEAL7	black
GNG10	black
ARV1	black
OCIAD1	black
C6orf125	black
RHEB	black
C1D	black
NUDCD2	black
TSFM	black
TMEM62	black
CAMK2N1	black
RIT2	black
RP4-604K5.1	black
SPRYD4	black
AC007390.5	black
MFF	black
ANKRD13A	black
SLC25A5	black
KIF9	black
SPA17	black
CCDC72	black
ZFAND2A	black
RHCE	black
NDUFB6	black
NME7	black
ATP5H	black
C14orf142	black
ITGAE	black
TUBA1B	black
MRPS36	black
C20orf30	black
GLMN	black
MRPL22	black
GNPDA1	black
RP11-392O18.1	black
PPP1R42	black
METTL21D	black
THOC7	black
PCGF1	black
ATPIF1	black
LIPT1	black
LDHA	black
FPGT-TNNI3K	black
ACN9	black
UBB	black
GGCT	black
MDP1	black
EBAG9	black
ISCA2	black
C1orf31	black
EMG1	black
NDUFA5	black
C9orf123	black
RP11-234B24.6	black
BCAS2	black
LMBRD1	black
FXN	black
ATP5J2	black
UBE2B	black
SLC22A4	black
MCEE	black
C15orf40	black
PPCS	black
MRPL33	black
PDCD6	black
MRPS15	black
COMMD10	black
NDUFB4	black
MRPS33	black
COMMD7	black
TCEAL8	black
NDUFB1	black
C6orf225	black
PSMG1	black
CNTD1	black
C1orf135	black
NLRP1	black
C20orf24	black
SEC11C	black
NTAN1	black
BET1	black
CHCHD4	black
RP11-613M10.8	black
MTRF1L	black
MRPS22	black
C6orf57	black
CNRIP1	black
NIF3L1	black
PRDX3	black
MRP63	black
ATP5F1	black
MED31	black
GABARAPL2	black
CXorf56	black
TSEN15	black
BEX1	black
TMEM85	black
TMEM14C	black
FAM26F	black
TMEM126B	black
NTPCR	black
ZFAND1	black
NHP2L1	black
ATP5B	black
NEDD8-MDP1	black
DNAJC19	black
IQCJ-SCHIP1	black
UQCRH	black
ATP5L	black
SCOC	black
INO80C	black
YIPF1	black
DYNLRB1	black
SLA2	black
NDUFA9	black
APTX	black
RWDD2B	black
ATP5J	black
KIAA1704	black
KHDC1	black
FAM162A	black
ATP5J2-PTCD1	black
COPS5	black
UROD	black
CYCS	black
HIGD1A	black
METTL20	black
NDUFAF1	black
NDUFB5	black
AEN	black
AP1S1	black
PRKAG1	black
NDUFA1	black
CRYBB1	black
CMBL	black
ACOT8	black
ALKBH3	black
GYG1	black
AC073043.2	black
RAB28	black
FXC1	black
NDUFB3	black
RAC1	black
POMZP3	black
B9D1	black
KRT17	black
RP11-691N7.6	black
RP5-977B1.10	black
NDUFA12	black
CALML4	black
POMP	black
BEX5	black
SCHIP1	black
PTS	black
BAG2	black
CBR4	black
C16orf61	black
RP11-526L8.1	black
PGK1	black
PSMD4	black
CYB5R1	black
LYRM7	black
UQCRQ	black
FAM185A	black
MYEOV2	black
MORN2	black
NDUFA4	black
ACYP2	black
FAM165B	black
TMEM17	black
FAM120AOS	black
ANAPC16	black
NUDT2	black
SNUPN	black
TOM1L1	black
MKKS	black
PTRH2	black
PIGL	black
CDADC1	black
USMG5	black
CRYZL1	black
PARK7	black
C17orf108	black
TMEM55B	black
FEZ1	black
C14orf129	black
C1orf53	black
COMMD1	black
C2orf80	black
WDR61	black
TUSC2	black
TRMT11	black
COX7A2	black
NDUFC1	black
SNX11	black
POLR2K	black
MDH1B	black
PAIP2	black
NR1I3	black
MGST3	black
LIAS	black
TMEM38B	black
CLEC4G	black
ELL3	black
POLR3K	black
HBXIP	black
C5orf44	black
COX11	black
HINT1	black
TAF13	black
MANBAL	black
TCEB1	black
RAB4A	black
C14orf119	black
C12orf24	black
C5orf28	black
TATDN1	black
MTIF3	black
KHDC1L	black
C10orf32	black
ZCRB1	black
CUTC	black
METTL21A	black
WDR5B	black
C15orf61	black
SEC62	black
C15orf38-AP3S2	black
STX8	black
QPCT	black
CHCHD7	black
MOCS2	black
CYB561D2	black
NDUFV2	black
SDHC	black
HSPB11	black
HSPE1	black
AP4S1	black
SLC25A3	black
RP11-379J5.2	black
KCTD4	black
ANKRD43	black
LYRM2	black
FAM54B	black
C8orf44	black
MRPS7	black
ACOT13	black
ATP5G3	black
CALM2	black
PSTK	black
SUPT4H1	black
MZT1	black
TATDN3	black
NKAP	black
CACYBP	black
OBFC2B	black
GLRX	black
RP11-257K9.7	black
RPS26	black
AGPHD1	black
POLR2C	black
TCEAL2	black
GOLGA7	black
GEMIN7	black
METTL1	black
TMEM59	black
SIRT5	black
C3orf33	black
ZCCHC17	black
ERI3	black
PIGP	black
APOO	black
GSTO1	black
FGFBP2	black
IMP4	black
PCNP	black
SSU72	black
ICT1	black
FAM173B	black
CCK	black
ALG14	black
CHCHD2	black
RIPPLY2	black
PDCD10	black
SDHB	black
CCDC53	black
CISD1	black
PIGH	black
POLDIP2	black
IFT46	black
SLC25A11	black
C4orf3	black
CD52	black
MRS2	black
PTPLAD2	black
TMX2	black
C1orf212	black
COMMD8	black
CMC1	black
PLN	black
C12orf29	black
ALG8	black
PEX19	black
UBE2F	black
TUBD1	black
IMP3	black
NNMT	black
C9orf103	black
DNAJC12	black
C11orf1	black
ZDHHC4	black
PPT1	black
FDX1	black
C2orf74	black
SLIRP	black
C7orf44	black
CCDC104	black
TMEM111	black
DDTL	black
MRPL10	black
ZSWIM7	black
GMPR2	black
RP11-169K16.7	black
RP4-725G10.1	black
GLRX5	black
CCDC56	black
C8orf38	black
NEDD8	black
EEF1E1	black
C17orf79	black
FUNDC1	black
C7orf23	black
CTXN2	black
THAP10	black
AMN1	black
C14orf2	black
BOLA3	black
HAX1	black
UQCRFS1	black
MRPL40	black
FOPNL	black
ZBTB8OS	black
TRUB2	black
POLE4	black
IFT57	black
MED8	black
DDT	black
NGFRAP1	black
LYSMD2	black
CTXN3	black
THYN1	black
TTC1	black
PARL	black
COX7B	black
CHURC1	black
SCG5	black
FAM45A	black
C9orf156	black
COX5A	black
SRP14	black
COX6C	black
LDHB	black
C1orf43	black
LYSMD4	black
FKBP1A	black
C9orf95	black
MRPL51	black
DYNLL1	black
NDUFAB1	black
PPP1R7	black
TFB1M	black
TMEM126A	black
MRPL48	black
PACRG	black
BEX2	black
MAP1LC3B	black
SKP1	black
NDUFS5	black
TRIM69	black
POP4	black
FAM162B	black
C7orf25	black
FABP6	black
RPA3	black
ATP5S	black
TMEM70	black
GLRX2	black
AKTIP	black
FAM206A	black
NDUFA8	black
NDUFC2	black
C20orf43	black
FEZ2	black
NUDT15	black
SOD1	black
PPP1R11	black
PET112	black
DTNBP1	black
KLHDC9	black
C4orf33	black
HSPB3	black
ENSA	black
SPHAR	black
TSC22D1	black
UQCRB	black
C12orf76	black
KDM5C	blue
EXOSC6	blue
UBOX5	blue
C22orf29	blue
URGCP	blue
FAM109B	blue
FBXL14	blue
VPS18	blue
WDR1	blue
THBS1	blue
TCOF1	blue
ATG14	blue
C19orf47	blue
CLPTM1L	blue
ABCF2	blue
DYRK1B	blue
NACAD	blue
GRM2	blue
PROM1	blue
UNC13B	blue
NOL6	blue
CLSTN2	blue
PCDHB5	blue
ZNF554	blue
ELAC2	blue
CPNE2	blue
TIMP2	blue
FAM134C	blue
FXR2	blue
SYMPK	blue
INTS1	blue
WWC1	blue
DHX33	blue
USP20	blue
CPNE1	blue
ZNF500	blue
CTIF	blue
C14orf21	blue
FAM123C	blue
DGCR2	blue
FYN	blue
SRF	blue
SLN	blue
IDI2	blue
HPS6	blue
CDH11	blue
IP6K1	blue
KCNQ2	blue
XPO6	blue
FARP1	blue
ULK1	blue
INTS5	blue
NCAN	blue
CEP85	blue
POLG	blue
COG8	blue
SRRM1	blue
SLC35F1	blue
PSMD2	blue
MGAT4B	blue
NODAL	blue
UPF2	blue
PI4KB	blue
ZNF668	blue
PLAGL1	blue
RAI1	blue
LRRC37A3	blue
TMEM201	blue
CDH3	blue
AKAP7	blue
GRWD1	blue
MAPK1IP1L	blue
TCTN2	blue
CCDC109B	blue
EXTL3	blue
MYBBP1A	blue
SEMA6D	blue
SLC16A2	blue
LRFN3	blue
SLC35E4	blue
LRRC20	blue
KRBA1	blue
CCNK	blue
AARS2	blue
LZTS1	blue
ZNF577	blue
STK35	blue
AC073343.9	blue
SMYD5	blue
PID1	blue
ZNF740	blue
JRK	blue
ZNF324	blue
FBXW8	blue
TMEM177	blue
PPP2R1B	blue
ZNF786	blue
CARM1	blue
FAM105A	blue
TMEM52	blue
TOR3A	blue
GOLGA1	blue
PTPN13	blue
ZNF780B	blue
ARHGAP17	blue
LPCAT1	blue
LHX2	blue
KIF26B	blue
RBM25	blue
ZNF587	blue
CRKL	blue
ZBTB40	blue
MECP2	blue
LHFPL4	blue
C1QTNF6	blue
SMTNL2	blue
CCDC125	blue
CSMD2	blue
CCNL1	blue
PPP1R29	blue
DYNC2H1	blue
FAM131B	blue
DCLK3	blue
XRRA1	blue
SH2D3C	blue
FIZ1	blue
AC024575.1	blue
UBN1	blue
ZBTB17	blue
FHL3	blue
SSH1	blue
PPP1R15A	blue
DLK2	blue
NEURL4	blue
KLF6	blue
SMCR8	blue
GMPPB	blue
EXOSC10	blue
PGS1	blue
WNT4	blue
C16orf88	blue
ATP11B	blue
ZNF526	blue
RELA	blue
FAM101B	blue
DHX30	blue
C20orf96	blue
MUL1	blue
ANKRD27	blue
PRSS12	blue
ZNF778	blue
TMEM127	blue
ZNF132	blue
RGS12	blue
GMEB2	blue
SPG11	blue
FRMD4A	blue
ZDHHC5	blue
ATCAY	blue
CCDC71	blue
FOXK2	blue
INPP5K	blue
LGALS8	blue
WNK2	blue
TDRKH	blue
BSDC1	blue
KAZN	blue
MARK4	blue
FZD1	blue
ZNF425	blue
ZNF672	blue
SNAPC4	blue
C16orf57	blue
ACTR5	blue
FAM118A	blue
DEPDC5	blue
ZACN	blue
TRAPPC9	blue
CORO2A	blue
FRS3	blue
MDM4	blue
ZNF341	blue
FNBP4	blue
G6PD	blue
RPAP1	blue
ZNF329	blue
HGSNAT	blue
DCLK2	blue
ZNF517	blue
RNF4	blue
GANC	blue
CYTH1	blue
ARHGEF18	blue
CLEC16A	blue
CACNA1E	blue
ZNF544	blue
TBC1D24	blue
DHX34	blue
GLT8D1	blue
KCNH2	blue
PHC2	blue
PLXNA4	blue
NR2C1	blue
GPN2	blue
POU3F2	blue
RP11-332O19.5	blue
ZNF264	blue
MACF1	blue
POU3F3	blue
SCMH1	blue
PTPRU	blue
RAB3D	blue
MTHFR	blue
RSAD1	blue
LRRFIP1	blue
B4GALNT1	blue
RGS19	blue
GAK	blue
TSSK2	blue
MTUS2	blue
GPR135	blue
CD2AP	blue
HMGCS1	blue
C6orf47	blue
MRAP	blue
MIER2	blue
ZNF646	blue
N4BP1	blue
ARHGAP21	blue
FCHO1	blue
CENPBD1	blue
METTL3	blue
MKL1	blue
NSDHL	blue
RUSC2	blue
FAM124A	blue
SYN3	blue
STK40	blue
FBXO42	blue
PXDN	blue
ZNF263	blue
TMEM43	blue
CTNND1	blue
CDK11A	blue
ZFHX2	blue
ZBTB46	blue
RP11-463C8.4	blue
DCAF4	blue
CDH24	blue
DPY19L2	blue
AC005280.1	blue
ZFYVE1	blue
AFF2	blue
FAM184B	blue
LINGO1	blue
ARMC6	blue
ZNF407	blue
ZNF557	blue
WDR4	blue
RP11-101E3.5	blue
EIF2C2	blue
ZNF142	blue
C9orf102	blue
LRRC47	blue
WNT9A	blue
KIAA0240	blue
PROKR2	blue
XAB2	blue
NRXN2	blue
RBL2	blue
GLB1L2	blue
GRP	blue
FBXO18	blue
PTGIS	blue
SCN9A	blue
PSMF1	blue
ARMCX6	blue
LPL	blue
NKAIN2	blue
FAM18A	blue
AEBP2	blue
CHMP7	blue
C9orf7	blue
C20orf20	blue
FEM1A	blue
SCAP	blue
NEUROD2	blue
URB1	blue
RNF19A	blue
ZNF48	blue
UNC79	blue
ACVR1	blue
PTK7	blue
SGPL1	blue
TIGD5	blue
NADSYN1	blue
MAP3K4	blue
REV3L	blue
DPP3	blue
WRAP73	blue
SERINC5	blue
ZNF71	blue
USP22	blue
CTDP1	blue
ZNF250	blue
PHKA2	blue
RP1-317E23.6	blue
ZNF259	blue
MDC1	blue
NCOR1	blue
EXOC7	blue
ANKDD1A	blue
AXIN2	blue
PBX4	blue
ZNF835	blue
MON1A	blue
ACCN2	blue
SIN3B	blue
RNF24	blue
ARHGAP35	blue
FAM89B	blue
RPTOR	blue
CABLES2	blue
AP1M1	blue
PPP1R26	blue
RPS6KL1	blue
FZR1	blue
KIAA1324	blue
VPS39	blue
TNPO2	blue
SSSCA1	blue
INTS3	blue
HNRNPUL2	blue
RP11-540D14.8	blue
TSC2	blue
MBD5	blue
ACTB	blue
TRIM58	blue
CIRBP	blue
CNTFR	blue
SEMA4B	blue
MNT	blue
SMYD4	blue
PTPN23	blue
SF3A1	blue
DISP2	blue
TRIM45	blue
LDLRAD3	blue
TMEM180	blue
ATRIP	blue
FAM110B	blue
GLG1	blue
ERGIC1	blue
UBA1	blue
ABCC1	blue
ACOX1	blue
SLC35E2B	blue
AKAP1	blue
TBCD	blue
TMEM131	blue
BLCAP	blue
SMG7	blue
ZC3H7B	blue
RTN1	blue
VILL	blue
PYGO2	blue
IGSF21	blue
KIAA1731	blue
TRPC4AP	blue
CCNF	blue
CBFA2T3	blue
ATPAF2	blue
LRRC3	blue
TECPR1	blue
TGFBRAP1	blue
RPUSD2	blue
EPG5	blue
NHSL1	blue
ABCF1	blue
RAB5C	blue
TSKU	blue
ZFYVE27	blue
MBD1	blue
DHX8	blue
SH3BP5L	blue
DSCAML1	blue
SEPN1	blue
TRIM26	blue
ZNF653	blue
ZNF766	blue
FAM69B	blue
CNO	blue
ZSWIM3	blue
ZSWIM5	blue
GEMIN4	blue
PRR14L	blue
TRIM68	blue
CCBE1	blue
RAD51D	blue
SEMA4G	blue
AGPAT4	blue
MGAT5	blue
WDR11	blue
SRC	blue
C17orf63	blue
DGAT1	blue
MBTPS1	blue
NAA16	blue
ZBTB49	blue
NDST1	blue
CCDC76	blue
EDC4	blue
RNF168	blue
AGRN	blue
OTX1	blue
SH2B2	blue
ZNF426	blue
DAGLB	blue
SETD5	blue
CNNM3	blue
RASSF2	blue
RNF216	blue
SLC35E1	blue
MMS19	blue
NAIF1	blue
USP19	blue
ACVR2B	blue
VARS	blue
SNAI2	blue
PTPN2	blue
CNNM4	blue
TAX1BP3	blue
LPHN1	blue
SATB2	blue
TRIT1	blue
PRRC2B	blue
STRADA	blue
GTF2H4	blue
ZNF608	blue
EHMT2	blue
AC091153.1	blue
ATF6B	blue
ZNF549	blue
COPS7B	blue
ZNF423	blue
VAC14	blue
NAV1	blue
SLC7A6OS	blue
INHBA	blue
RHOBTB1	blue
MSMP	blue
PDZD2	blue
TUBGCP2	blue
CELSR3	blue
PIAS4	blue
PES1	blue
AKAP12	blue
LRRN3	blue
C2CD3	blue
CACNB3	blue
EXOC4	blue
SMC1A	blue
SLC38A7	blue
ODZ4	blue
ZC3H10	blue
SEMA4C	blue
ZNF585B	blue
RBM23	blue
KIAA0947	blue
KIF3C	blue
SLAMF8	blue
IGLON5	blue
C2	blue
DOK5	blue
ZNF324B	blue
VPS26B	blue
PCNXL3	blue
WFDC2	blue
KHSRP	blue
L3MBTL3	blue
HIVEP3	blue
BYSL	blue
CEP250	blue
ALG12	blue
PCNT	blue
UBE2Z	blue
DGCR14	blue
TUBA1C	blue
ZNF689	blue
SMARCAL1	blue
BRPF1	blue
TUBGCP3	blue
CCDC66	blue
ZNF101	blue
TULP4	blue
BCOR	blue
RBBP6	blue
TRPV1	blue
DDX42	blue
POFUT1	blue
NDST2	blue
ELAVL3	blue
TRO	blue
RFFL	blue
KIAA0415	blue
NIN	blue
SPINT1	blue
ZCCHC18	blue
BAHD1	blue
YTHDF1	blue
AMBRA1	blue
FABP5	blue
FAM40A	blue
MFSD9	blue
EMX1	blue
KIAA0907	blue
ZNF562	blue
RAPGEF1	blue
IPO9	blue
ANKS1A	blue
ARHGAP33	blue
USF1	blue
SSH2	blue
ZNF490	blue
CECR6	blue
HDAC9	blue
ZC3H3	blue
SEMA3F	blue
TFIP11	blue
RAPGEF6	blue
TSPAN14	blue
TXLNA	blue
ASCL2	blue
SHB	blue
HNRNPUL1	blue
BTN3A1	blue
THOC5	blue
EIF2B5	blue
EMD	blue
PGBD1	blue
CCNJ	blue
SREBF2	blue
RP11-123K3.4	blue
CLPB	blue
ZNF623	blue
ZNF212	blue
RBM4B	blue
PATL1	blue
UPF1	blue
FBXW2	blue
GBF1	blue
PRPF8	blue
RASL11B	blue
PPP1R14B	blue
ODF2	blue
CIZ1	blue
GTPBP2	blue
PPRC1	blue
NSUN2	blue
MAD1L1	blue
INCENP	blue
ZNF774	blue
C1orf204	blue
SPECC1L	blue
ZNF319	blue
FAM57A	blue
BRD2	blue
KIF21B	blue
ZC3H7A	blue
EIF3B	blue
HMGXB3	blue
DPEP1	blue
RAD52	blue
RAD54L2	blue
SYVN1	blue
ZMYND8	blue
SUPT6H	blue
BAZ2B	blue
MYH10	blue
KCNA6	blue
MTR	blue
C19orf29	blue
PHF21B	blue
ENDOV	blue
CLIP2	blue
GRIK5	blue
MN1	blue
MED14	blue
EWSR1	blue
CSNK1D	blue
WDR59	blue
TIGD3	blue
ARHGEF2	blue
ZKSCAN5	blue
POU3F1	blue
WDR81	blue
NCAPD3	blue
EFS	blue
ZNF764	blue
PML	blue
ZSCAN16	blue
RAB35	blue
SSTR2	blue
PDE9A	blue
ZNF174	blue
COG4	blue
EEFSEC	blue
SMCR7	blue
ZSCAN2	blue
LRCH3	blue
ZNF528	blue
CBL	blue
LRP8	blue
IPO4	blue
BRD7	blue
PTPN21	blue
FGFBP3	blue
RUFY1	blue
CTBP1	blue
ZNF530	blue
FAM101A	blue
ALDH1B1	blue
ZNF598	blue
C4orf29	blue
FAM110A	blue
TAF4	blue
PPP1R28	blue
PDE7A	blue
SRRM4	blue
MCM3AP	blue
SLC8A3	blue
YKT6	blue
GCFC1	blue
SLC12A6	blue
ZCCHC14	blue
CNOT1	blue
SON	blue
ABCA3	blue
HDAC6	blue
GRK5	blue
ARIH2	blue
ZNF574	blue
SAMD14	blue
MYT1	blue
ZNF69	blue
ZNF395	blue
PNPLA3	blue
IGHMBP2	blue
TMEM200C	blue
TEX22	blue
DISP1	blue
KIAA0586	blue
NKAIN1	blue
WHSC1L1	blue
REXO4	blue
TADA2B	blue
ZYX	blue
ZNF74	blue
TTC3	blue
PAN3	blue
ZNF398	blue
ZNF498	blue
ABCA1	blue
SLC25A15	blue
ALDH1L2	blue
MFHAS1	blue
DUSP18	blue
BRD9	blue
SPNS1	blue
KLHL22	blue
CACNA1B	blue
EVC	blue
PEX5	blue
WDR46	blue
SLC39A7	blue
EIF1AD	blue
2019-09-06	blue
ZNF3	blue
LDOC1L	blue
EIF2C3	blue
POLL	blue
NR2C2	blue
SRCAP	blue
ZDHHC18	blue
SEMA6A	blue
CIDEB	blue
ERCC3	blue
SGK196	blue
PHRF1	blue
SCRT2	blue
LASP1	blue
JUP	blue
RBM10	blue
ST3GAL2	blue
ARHGAP39	blue
SPSB4	blue
NUP98	blue
ERV3-1	blue
ELL	blue
LHX6	blue
MEX3A	blue
STK32B	blue
RGP1	blue
DHX37	blue
CACNA1H	blue
SALL2	blue
WRAP53	blue
JOSD1	blue
PCDHB7	blue
SEZ6	blue
MSRA	blue
TP53BP1	blue
BRD3	blue
YPEL1	blue
WNT5B	blue
SOS2	blue
ACER2	blue
LRWD1	blue
EFNA3	blue
TRIM16	blue
PIM1	blue
GFOD2	blue
UBE2G2	blue
ALX3	blue
LIG3	blue
IGSF9	blue
CHAF1A	blue
USP4	blue
ZNF446	blue
DPYSL4	blue
MTF1	blue
MYT1L	blue
ZNF514	blue
C22orf39	blue
MESDC1	blue
NUP188	blue
GRAMD1A	blue
ZNF460	blue
ENOX1	blue
VPS37B	blue
PRPF3	blue
C11orf2	blue
HIATL2	blue
MTA1	blue
MSTO1	blue
GLTSCR1	blue
AHDC1	blue
RNPS1	blue
KLHL14	blue
LDB1	blue
NBEA	blue
ABL2	blue
ZNF318	blue
PRRC2A	blue
GPC1	blue
VOPP1	blue
DPYSL2	blue
PDPR	blue
SCAMP3	blue
TAOK2	blue
PDCD11	blue
AP3D1	blue
HDAC3	blue
TMEM132A	blue
KIAA1310	blue
RAP2B	blue
KLC4	blue
TACC2	blue
ZNF792	blue
SLC37A3	blue
PMM2	blue
PSMG4	blue
MYO18A	blue
GPRIN1	blue
KDM2A	blue
TCF20	blue
VHL	blue
YLPM1	blue
MTMR14	blue
LRP5	blue
HSD17B7	blue
FAM24B	blue
DDX55	blue
COPG	blue
SEC24C	blue
FBXL20	blue
DMTF1	blue
MRPS2	blue
ZSCAN22	blue
MAMLD1	blue
SAFB2	blue
MED26	blue
INO80D	blue
HINFP	blue
C3orf21	blue
RNF165	blue
C10orf12	blue
PLXNA1	blue
RAB11B	blue
GRIP2	blue
CNPY4	blue
CD2BP2	blue
RBM6	blue
C12orf35	blue
SHISA9	blue
SLC26A4	blue
CLK2	blue
ZNF836	blue
GPATCH1	blue
ZNF397	blue
CSMD3	blue
CDAN1	blue
GAL3ST4	blue
NOL9	blue
VANGL2	blue
BOD1L	blue
CELF6	blue
TP53I11	blue
KIAA0556	blue
SHISA6	blue
ZNF662	blue
CUEDC1	blue
GNA11	blue
CUL7	blue
TOR1B	blue
ZNF570	blue
FXYD6	blue
UBAP2L	blue
ZNF594	blue
PPAPDC1B	blue
CMIP	blue
SERTAD2	blue
TESK1	blue
TTC28	blue
NEO1	blue
NSG1	blue
CTNNBIP1	blue
TOP3B	blue
SCUBE1	blue
KRT19	blue
LMBR1L	blue
SDCCAG8	blue
ST3GAL1	blue
NXF1	blue
ZNF274	blue
RNF40	blue
LTB4R2	blue
ADRA2A	blue
ZNF862	blue
LRRC41	blue
MED15	blue
CELF5	blue
USP42	blue
SCRIB	blue
ZKSCAN1	blue
GAB2	blue
ZNF589	blue
TRIM28	blue
SH3BP5	blue
ALDH16A1	blue
EIF2C1	blue
SEC16A	blue
RBFOX2	blue
NUP62	blue
VPRBP	blue
ZFP62	blue
NOL4	blue
C2orf68	blue
BDP1	blue
AKAP8	blue
EFNA2	blue
FBXO46	blue
TMEM39B	blue
SURF6	blue
IL17RD	blue
PASK	blue
SLIT1	blue
FAM125B	blue
AGPAT6	blue
ARGLU1	blue
CRMP1	blue
SDK2	blue
VGLL4	blue
GOLGA3	blue
ZNF746	blue
GPRIN2	blue
AC007040.11	blue
SARM1	blue
KAT6B	blue
DNAH10OS	blue
SLC22A23	blue
UPK2	blue
PLAGL2	blue
RUSC1	blue
NAV2	blue
ZNF311	blue
TTC36	blue
ARID2	blue
C5orf25	blue
ZNF821	blue
MSL2	blue
FAM171A2	blue
MLL2	blue
INVS	blue
ZNF789	blue
WDR90	blue
ZNF696	blue
RP11-385D13.1	blue
TRIM27	blue
LMNB2	blue
DDX17	blue
NOL12	blue
NKIRAS2	blue
SVIL	blue
ZNF578	blue
TRIOBP	blue
CCDC101	blue
FAM18B2-CDRT4	blue
GTPBP1	blue
TLE3	blue
MYCN	blue
SETD1A	blue
FGD6	blue
GTF3C1	blue
HIC2	blue
ATP7B	blue
ERAL1	blue
OS9	blue
POM121	blue
SAMD1	blue
PABPC4	blue
RERE	blue
AKAP9	blue
PTOV1	blue
ARHGAP19	blue
SBK1	blue
FOXO6	blue
TMUB2	blue
TUB	blue
ZNF704	blue
DIAPH1	blue
IGF1R	blue
BAZ2A	blue
PRMT7	blue
SIN3A	blue
POLR2A	blue
BHLHE22	blue
UGGT1	blue
PRRG3	blue
PKN1	blue
ASCC2	blue
CDK5R1	blue
PAFAH1B3	blue
NASP	blue
ZNF317	blue
ATM	blue
AC010336.1	blue
TBC1D16	blue
HDAC4	blue
NPHP4	blue
CAMSAP1	blue
PHACTR4	blue
LSM14B	blue
KIRREL	blue
HUWE1	blue
MEGF6	blue
SFSWAP	blue
EIF2AK1	blue
ANO4	blue
RNF10	blue
PTCHD2	blue
MOGS	blue
FAM123B	blue
PACS1	blue
WHSC2	blue
FRAS1	blue
ASAP2	blue
SLC35C1	blue
FBLN1	blue
ZNF655	blue
FGD1	blue
NCOA3	blue
C3orf78	blue
YEATS2	blue
STAU1	blue
PLXNB2	blue
MICAL3	blue
NBPF1	blue
PARD6G	blue
VAV2	blue
BCL7A	blue
GPATCH8	blue
WIZ	blue
CACNG4	blue
KLC3	blue
FLII	blue
GTF2F1	blue
MPHOSPH9	blue
PTPRO	blue
GTF3C2	blue
CHRNB4	blue
RCOR1	blue
FHOD3	blue
PRPF31	blue
SETD8	blue
POLDIP3	blue
SNAPC2	blue
ZNF251	blue
HECTD3	blue
CAMKV	blue
C19orf57	blue
IDH3G	blue
SLC46A1	blue
BANP	blue
PRCC	blue
ZNF417	blue
NOP14	blue
IL4I1	blue
C12orf51	blue
POLR3D	blue
SP1	blue
ELF2	blue
USP21	blue
DCAF15	blue
LPAR2	blue
ZNF202	blue
ARID1B	blue
PDZRN4	blue
KCNH8	blue
SLC35D1	blue
C17orf101	blue
DZANK1	blue
ZNF793	blue
SRGAP2P1	blue
MTHFSD	blue
WDR6	blue
HPS4	blue
KIAA2026	blue
TRH	blue
ZNF471	blue
HEATR6	blue
STX3	blue
TTLL12	blue
CHD3	blue
HS6ST1	blue
PRDM15	blue
GGA1	blue
ZNF334	blue
CMTM1	blue
USP49	blue
CHD6	blue
POR	blue
WDR27	blue
FOXK1	blue
ZNF777	blue
CDK12	blue
DIP2A	blue
SAMD10	blue
PSMC1	blue
CELF1	blue
ZNF747	blue
RCOR2	blue
FAM160A2	blue
LIMD2	blue
KCTD11	blue
TTC15	blue
CEP104	blue
LRRC48	blue
DDX39B	blue
MLLT1	blue
KIAA1370	blue
PRRC2C	blue
FBRS	blue
KIAA1967	blue
ULBP3	blue
UCK2	blue
DCLRE1C	blue
SMARCA4	blue
KSR1	blue
TYW1	blue
MMP11	blue
DGCR8	blue
GNL3L	blue
WDR19	blue
PRKAB1	blue
C11orf30	blue
PLK3	blue
MED12	blue
PIWIL4	blue
EPHA1	blue
SHPK	blue
ANKRD11	blue
PARP2	blue
INTS4	blue
CORO7	blue
ADNP	blue
BPTF	blue
MANEAL	blue
IRF2BPL	blue
GTPBP3	blue
ADD1	blue
LRSAM1	blue
KIAA0895L	blue
SMARCD1	blue
PTPRS	blue
SMARCA2	blue
UBN2	blue
TSSK4	blue
CRYGD	blue
MAP3K3	blue
PUS7	blue
TMEM229B	blue
ZBED4	blue
ADAMTS7	blue
APC2	blue
POLR1A	blue
UBR5	blue
RTN4RL1	blue
C11orf95	blue
FJX1	blue
SF1	blue
ZNF343	blue
B4GALT5	blue
ROCK1	blue
STK38	blue
ANKRD17	blue
ZNF135	blue
UHRF1BP1	blue
FUS	blue
EXOSC2	blue
ZSCAN21	blue
ZNF75A	blue
NOP2	blue
ARMC7	blue
USP24	blue
CBS	blue
DCAKD	blue
KIAA1609	blue
SCUBE3	blue
SDC1	blue
ZFC3H1	blue
CRAMP1L	blue
GPR161	blue
MEX3B	blue
SCGN	blue
CHD8	blue
PAPD7	blue
BRD1	blue
RBM19	blue
ZRSR1	blue
WNT7A	blue
MLXIP	blue
HIP1	blue
COTL1	blue
ILF3	blue
ZNF213	blue
SKI	blue
SART1	blue
ARID3B	blue
CABIN1	blue
EHMT1	blue
FAM116B	blue
MAN2B1	blue
ODZ2	blue
ANKRD10	blue
KIAA0182	blue
BTBD7	blue
KCTD7	blue
REC8	blue
SAFB	blue
LIG1	blue
WDR5	blue
PCDH19	blue
SCAF4	blue
USP48	blue
FRAT2	blue
C15orf38	blue
TNKS1BP1	blue
MCF2L	blue
MCM7	blue
CPSF4L	blue
FANCE	blue
IQCE	blue
2019-03-04	blue
KIAA1211	blue
CCDC120	blue
ASXL3	blue
FAM168A	blue
MAU2	blue
C16orf55	blue
C19orf44	blue
ZNF232	blue
ZNF382	blue
HIRIP3	blue
KIAA0355	blue
DLST	blue
ZNF592	blue
PANK4	blue
FAM155B	blue
ZXDC	blue
KAT6A	blue
ZC3H13	blue
ZNF710	blue
MGA	blue
RTTN	blue
INO80	blue
SLC29A4	blue
ACOX3	blue
DPYSL5	blue
PPP2R1A	blue
QSOX2	blue
TRRAP	blue
RAVER1	blue
KDM4A	blue
TRIM67	blue
DPYSL3	blue
DAPK1	blue
POLH	blue
ZNF609	blue
ZNF841	blue
C14orf43	blue
AMOTL2	blue
ZBTB12	blue
FBN3	blue
WNT7B	blue
EFNB3	blue
SFT2D2	blue
DIP2C	blue
TBC1D30	blue
ZNF434	blue
ST8SIA2	blue
C14orf102	blue
NLE1	blue
DOK4	blue
CDH4	blue
CEP164	blue
RNPEP	blue
EFNB1	blue
STAG3	blue
DDX27	blue
LRRC61	blue
ZNF543	blue
SF3B4	blue
SETD6	blue
CDKN1C	blue
GNB1L	blue
AC073343.8	blue
B3GALT1	blue
GDPD5	blue
BEND3	blue
TEKT2	blue
HERC2	blue
ZC4H2	blue
INTS9	blue
SLC35B2	blue
MTA2	blue
TMEM44	blue
TOR1AIP2	blue
FAM21C	blue
TATDN2	blue
TOP1MT	blue
HCFC1	blue
ZNF284	blue
PTX3	blue
2019-03-08	blue
BUD13	blue
DVL3	blue
MMP24	blue
ZNF713	blue
AZI1	blue
AXIN1	blue
NADK	blue
RANBP3	blue
FAM78B	blue
PCDHB11	blue
NFX1	blue
PGAP2	blue
CNTROB	blue
JARID2	blue
ZNF512B	blue
TOE1	blue
SLC37A4	blue
FAM127C	blue
NOC2L	blue
INPP5E	blue
PARP1	blue
AMMECR1L	blue
DYRK2	blue
CCDC97	blue
XRCC1	blue
LRIG2	blue
BCL9	blue
KIAA2018	blue
ZNF121	blue
NME6	blue
DDX23	blue
OSBPL5	blue
EXOC2	blue
KLHL25	blue
BAZ1B	blue
KLHL29	blue
FBLIM1	blue
DUSP9	blue
ZCCHC11	blue
SUFU	blue
METTL16	blue
SPEN	blue
NAT10	blue
LRRN2	blue
TMX2-CTNND1	blue
EP300	blue
SZT2	blue
PRR19	blue
EYA3	blue
SH3GL1	blue
NUP85	blue
DDX26B	blue
UTP20	blue
NRM	blue
STRN4	blue
ZFYVE26	blue
NYNRIN	blue
AZU1	blue
NFIX	blue
SNN	blue
FTSJ3	blue
KLF11	blue
POTEF	blue
TMEM8A	blue
RP11-468E2.2	blue
NOVA2	blue
CCDC93	blue
DOLK	blue
PAG1	blue
RSPO3	blue
DTX1	blue
KIAA1267	blue
POLR3E	blue
ZNF7	blue
DYNC1H1	blue
ZNF703	blue
HDLBP	blue
POLR2D	blue
DIDO1	blue
ZNF638	blue
DOPEY1	blue
GON4L	blue
TNRC6C	blue
DDX49	blue
SRGAP1	blue
TPR	blue
RALGPS1	blue
IFT140	blue
TSPAN18	blue
TUBB3	blue
RP11-566K11.2	blue
RPL7L1	blue
C7orf29	blue
EDC3	blue
NOM1	blue
SH3BP2	blue
MAST2	blue
VASH1	blue
GALNT2	blue
SUGP2	blue
ANKHD1-EIF4EBP3	blue
SRRT	blue
SLTM	blue
AKT1	blue
WDR86	blue
NUP210	blue
MED1	blue
TIRAP	blue
TOP3A	blue
DHX16	blue
IPP	blue
NSD1	blue
RAF1	blue
PRPF6	blue
SUPT5H	blue
KIAA2022	blue
AFAP1	blue
TRAF4	blue
VPS37D	blue
ZNF418	blue
HCN3	blue
FBRSL1	blue
ZNF496	blue
DBN1	blue
CARHSP1	blue
KIAA0753	blue
ZSCAN29	blue
ZBTB25	blue
SSRP1	blue
DSCAM	blue
TRPM7	blue
NCK2	blue
PROSER1	blue
MAML1	blue
ATP6V1G2-DDX39B	blue
CEP192	blue
CASP2	blue
PCIF1	blue
RP3-403A15.5	blue
ADCY6	blue
BCL9L	blue
FOXG1	blue
DNASE1	blue
KCTD5	blue
C1orf187	blue
GRK6	blue
DFFB	blue
LRP1B	blue
TBC1D1	blue
L1CAM	blue
TOX3	blue
ABCD1	blue
KIAA0319	blue
GTF2IRD1	blue
C6orf174	blue
SNX27	blue
FAM50B	blue
RBM5	blue
MARCKSL1	blue
ARL10	blue
LRFN2	blue
ZKSCAN4	blue
ZNF804A	blue
ARHGAP1	blue
AMY2B	blue
CDON	blue
OFD1	blue
KLHL35	blue
LIMK2	blue
MED24	blue
ZNF513	blue
NPR2	blue
TET3	blue
HN1	blue
SCN3A	blue
SOX11	blue
MOB3A	blue
ZNF282	blue
GRIP1	blue
SAP130	blue
SRGAP2P2	blue
KLF7	blue
SEC61A1	blue
RBM14	blue
HIP1R	blue
KRBA2	blue
NSMAF	blue
MICAL1	blue
GDAP1L1	blue
GRK4	blue
PLXNA3	blue
UNK	blue
TSC1	blue
USP28	blue
R3HDM2	blue
SART3	blue
ANKHD1	blue
NEDD4L	blue
[truncated: 11,262 more rows]
