# Supplementary material for: Gene expression imputation and cell-type deconvolution in human brain with spatiotemporal precision and its implications for brain-related disorders
Source: HighWire-hosted journal article supplement (doi:10.1101/gr.265769.120), 2020-12-03
Supplement: Supplemental_Table_S3.xlsx [file Supplemental_Table_S3.xlsx]

## Sheet: Table S3_1
Supplemental Table S3. Cell type composition score of BrainSpan samples based on cell type deconvolution analysis based on panel A.
Sample	Individual	Age	Gender	Stage_ordinal	Fetal-Microglia	Fetal-IPC	Fetal-Pericytes	Fetal-OPC	Fetal-Endothelial	Fetal-Astrocytes	Fetal-Oligo	Fetal-Trans	Fetal-NEP	Astrocytes	Endothelial	Fetal-quiescent	Fetal-replicating	Microglia	Neurons	OPC	Oligodendrocytes	P-value	Pearson Correlation	RMSE
H376.IIB.50.AMY	H376.IIB.50	12 pcw	F	stage1	0.00362974	0.27898	0	0	0.127511	0.234778	0	0.131807	0	0.00753224	0	0.185178	0	0	0.0294223	0	0.00116205	0	0.485907	0.910876
H376.IIB.50.STC	H376.IIB.50	12 pcw	F	stage1	0	0.248016	0	0.101177	0.0384183	0.102299	0	0.0135702	0	0	0.00194423	0.374601	0	0	0.111396	0.00857872	0	0	0.514715	0.874821
H376.IIB.50.MFC	H376.IIB.50	12 pcw	F	stage1	0.0198921	0.261804	0	0.11671	0.0180654	0.0685998	0	0	0	0	0	0.397048	0	0	0.110616	0.007264	0	0	0.561087	0.838995
H376.IIB.50.DFC	H376.IIB.50	12 pcw	F	stage1	0.0298697	0.219976	0	0.0869869	0	0.0811114	0	0	0	0	0	0.461858	0	0	0.111886	0.00831146	0	0	0.569457	0.835766
H376.IIB.50.OFC	H376.IIB.50	12 pcw	F	stage1	0.0155238	0.199491	0	0.107884	0.0312164	0.10311	0	0	0	0	0	0.423829	0	0	0.108869	0.0100771	0	0	0.5706	0.831471
H376.IIB.50.ITC	H376.IIB.50	12 pcw	F	stage1	0.0171487	0.128781	0	0.0406134	0.0212192	0.139322	0	0.185748	0	0	0.00252695	0.346296	0	0	0.110451	0.00789407	0	0	0.530832	0.859203
H376.IIB.50.HIP	H376.IIB.50	12 pcw	F	stage1	0.0387907	0.143548	0	0	0.0930117	0.241068	0	0.245592	0	0.00803621	0	0.151708	0	0	0.0696158	0.0009	0.00770051	0	0.499479	0.890118
H376.IIB.50.VFC	H376.IIB.50	12 pcw	F	stage1	0.025433	0.233417	0	0.111048	0.0002	0.0836375	0	0	0	0	0	0.447872	0	0	0.0916411	0.00672784	0	0	0.558079	0.845971
H376.IIB.50.A1C	H376.IIB.50	12 pcw	F	stage1	0.00190439	0.169928	0	0.0597966	0.0587816	0.125675	0	0.06155	0	0	0.0002	0.407049	0	0	0.108103	0.00705519	0	0	0.506555	0.882022
H376.IIB.50.V1C	H376.IIB.50	12 pcw	F	stage1	0.0227111	0.207017	0	0.0927157	0.0210284	0.131298	0	0.0971105	0	0	0.00105587	0.319089	0	0	0.105729	0.00224519	0	0	0.506503	0.879693
H376.IIB.50.STR	H376.IIB.50	12 pcw	F	stage1	0.00466979	0	0	0.0174189	0.078986	0.251341	0.016639	0.233995	0	0	0	0.198384	0	0	0.159907	0.0386583	0	0	0.471479	0.892208
H376.IIB.50.M1C	H376.IIB.50	12 pcw	F	stage1	0.025953	0.24641	0	0.0999344	0.0124825	0.0869891	0	0	0	0	0	0.414422	0	0	0.108441	0.00536797	0	0	0.538931	0.858805
H376.IIB.50.IPC	H376.IIB.50	12 pcw	F	stage1	0.0147184	0.237151	0	0.0942845	0.0360737	0.0832732	0	0.0272418	0	0	0	0.379226	0	0	0.121526	0.00650481	0	0	0.53644	0.857037
H376.IIB.50.S1C	H376.IIB.50	12 pcw	F	stage1	0.00777697	0.203121	0	0.125814	0.026559	0.106692	0	0.0232025	0	0	0	0.38499	0	0	0.110667	0.0111769	0	0	0.556379	0.840903
H376.IIB.50.CBC	H376.IIB.50	12 pcw	F	stage1	0.0133015	0.181756	0	0	0.0887972	0.145382	0	0.0953742	0	0.0129982	0	0.308679	0	0	0.137413	0.0162978	0	0	0.484338	0.889799
H376.IIB.50.MD	H376.IIB.50	12 pcw	F	stage1	0.00278201	0.163543	0	0	0.0398097	0.150317	0	0.0730248	0	0	0	0.268597	0	0	0.284876	0.0170505	0	0	0.489233	0.879066
H376.IIB.51.AMY	H376.IIB.51	12 pcw	F	stage1	0.0318613	0.136533	0	0	0.00725442	0.24472	0	0.122336	0	0.0008	0	0.296286	0	0	0.149316	0.00982204	0.00110685	0	0.463191	0.907276
H376.IIB.51.STC	H376.IIB.51	12 pcw	F	stage1	0.014256	0.174119	0	0.0655757	0.023776	0.158727	0	0.0720781	0	0	0	0.354058	0	0	0.123604	0.0138062	0	0	0.525487	0.863361
H376.IIB.51.MFC	H376.IIB.51	12 pcw	F	stage1	0.0154197	0.262433	0	0.11024	0.0273376	0.113407	0	0	0	0	0	0.362192	0	0	0.099672	0.0092984	0	0	0.556089	0.842359
H376.IIB.51.DFC	H376.IIB.51	12 pcw	F	stage1	0.00555973	0.144263	0	0.0790642	0.0189724	0.181459	0	0.0251881	0	0	0	0.387831	0	0	0.143312	0.0143496	0	0	0.592872	0.809319
H376.IIB.51.OFC	H376.IIB.51	12 pcw	F	stage1	0.00230745	0.155642	0	0.0986257	0.0544622	0.204219	0	0.0055217	0	0	0	0.326631	0	0	0.136864	0.0157272	0	0	0.593482	0.807101
H376.IIB.51.ITC	H376.IIB.51	12 pcw	F	stage1	0.0105661	0.182866	0	0.0186167	0.043908	0.163429	0	0.0697192	0	0	0	0.376436	0	0	0.12456	0.00989908	0	0	0.527053	0.863866
H376.IIB.51.HIP	H376.IIB.51	12 pcw	F	stage1	0.0248452	0.236994	0	0	0.0669268	0.231591	0	0.0842159	0	0.0059365	0	0.286069	0.0006	0	0.0606742	0	0.0021715	0	0.51324	0.880432
H376.IIB.51.VFC	H376.IIB.51	12 pcw	F	stage1	0.0260334	0.168551	0	0.080565	0.0050919	0.181117	0	0.0536174	0	0	0	0.367526	0	0	0.100417	0.0170818	0	0	0.571774	0.828047
H376.IIB.51.A1C	H376.IIB.51	12 pcw	F	stage1	0.0250395	0.138231	0	0.0880398	0.017065	0.136916	0	0.0488469	0	0	0	0.37219	0	0	0.163677	0.00999559	0	0	0.571261	0.825511
H376.IIB.51.V1C	H376.IIB.51	12 pcw	F	stage1	0.0231123	0.294752	0	0.0457512	0.027845	0.104761	0	0.00928639	0	0	0	0.352063	0	0	0.142429	0	0	0	0.525935	0.865617
H376.IIB.51.STR	H376.IIB.51	12 pcw	F	stage1	0.0208406	0.144024	0	0	0	0.34185	0	0.201906	0	0	0.0024544	0.187953	0	0	0.0980481	0.00292377	0	0	0.518917	0.873389
H376.IIB.51.M1C	H376.IIB.51	12 pcw	F	stage1	0.0215675	0.189923	0	0.0848672	0.00311103	0.0984243	0	0.0392097	0	0	0	0.428423	0	0	0.12497	0.0095047	0	0	0.547694	0.850107
H376.IIB.51.IPC	H376.IIB.51	12 pcw	F	stage1	0.00796382	0.159514	0	0.0691268	0.0515647	0.13603	0	0.040092	0	0	0	0.385952	0	0	0.134193	0.0155634	0	0	0.539815	0.852074
H376.IIB.51.S1C	H376.IIB.51	12 pcw	F	stage1	0.00807035	0.13578	0	0.0976483	0.0438856	0.198031	0	0.0885547	0	0	0	0.29297	0	0	0.120488	0.0145722	0	0	0.573303	0.823155
H376.IIB.51.CBC	H376.IIB.51	12 pcw	F	stage1	0.0121683	0.276154	0	0	0.0418518	0.130431	0	0.0550811	0	0.0136937	0	0.318392	0	0	0.132627	0.0196009	0	0	0.479837	0.896693
H376.IIB.51.MD	H376.IIB.51	12 pcw	F	stage1	0	0.21682	0	0	0.0550903	0.227953	0	0.0455181	0	0	0	0.297265	0	0	0.136894	0.0114596	0.00899896	0	0.528887	0.859141
H376.IIB.52.AMY	H376.IIB.52	12 pcw	F	stage1	0	0.211255	0	0	0.0573656	0.210203	0	0.0638409	0	0	0	0.244346	0	0	0.166892	0.0458682	0.0002	0	0.467644	0.898326
H376.IIB.52.STC	H376.IIB.52	12 pcw	F	stage1	0.00662681	0.216	0	0	0.0790988	0.303926	0	0.0299866	0	0	0	0.202742	0	0	0.128439	0.024567	0.00861478	0	0.536097	0.852401
H376.IIB.52.MFC	H376.IIB.52	12 pcw	F	stage1	0.018103	0.173268	0	0.114324	0.0108437	0.0969219	0	0	0	0	0	0.460715	0	0	0.113982	0.0118424	0	0	0.615948	0.793681
H376.IIB.52.DFC	H376.IIB.52	12 pcw	F	stage1	0.0217345	0.160414	0	0.0712645	0.0295171	0.174309	0	0.0050675	0	0	0	0.410446	0	0	0.113121	0.014126	0	0	0.587749	0.815871
H376.IIB.52.OFC	H376.IIB.52	12 pcw	F	stage1	0.0057901	0.147442	0	0.134967	0.0227069	0.123263	0	0	0	0	0	0.437249	0	0	0.113992	0.0145897	0	0	0.603898	0.802683
H376.IIB.52.ITC	H376.IIB.52	12 pcw	F	stage1	0.00496634	0.219499	0	0	0.0717313	0.28215	0	0.0269228	0	0	0	0.243905	0	0	0.140039	0.0107857	0	0	0.537735	0.852474
H376.IIB.52.HIP	H376.IIB.52	12 pcw	F	stage1	0.011681	0.243086	0	0	0.0836508	0.266074	0	0.0253327	0	0.00278259	0	0.266436	0	0	0.100957	0	0	0	0.521706	0.869792
H376.IIB.52.VFC	H376.IIB.52	12 pcw	F	stage1	0.0182085	0.222717	0	0.112704	0.0493482	0.211496	0	0	0	0	0	0.26639	0	0	0.102021	0.0171148	0	0	0.545007	0.847448
H376.IIB.52.A1C	H376.IIB.52	12 pcw	F	stage1	0	0.11482	0	0.025601	0.0361899	0.242297	0	0.0378204	0	0	0	0.376804	0	0	0.138628	0.0278387	0	0	0.551632	0.841829
H376.IIB.52.V1C	H376.IIB.52	12 pcw	F	stage1	0.0166743	0.247997	0	0.0572012	0.0154103	0.21628	0	0	0	0	0	0.301287	0	0	0.133431	0.0117196	0	0	0.523541	0.86512
H376.IIB.52.STR	H376.IIB.52	12 pcw	F	stage1	0.025242	0.22973	0	0	0.00853627	0.143041	0	0.0182477	0	0	0	0.332833	0	0	0.228331	0.0140396	0	0	0.455146	0.910185
H376.IIB.52.M1C	H376.IIB.52	12 pcw	F	stage1	0.013142	0.152527	0	0.0890505	0.0418945	0.1669	0	0	0	0	0	0.40579	0	0	0.115302	0.0153932	0	0	0.590091	0.813168
H376.IIB.52.IPC	H376.IIB.52	12 pcw	F	stage1	0	0.208594	0	0	0.0407194	0.390942	0	0.00740776	0	0	0	0.221783	0	0	0.116802	0.0137525	0	0	0.538469	0.854388
H376.IIB.52.S1C	H376.IIB.52	12 pcw	F	stage1	0.00197098	0.196607	0	0.072071	0.0696441	0.205561	0	0.0041404	0	0	0	0.30809	0	0	0.123861	0.0180543	0	0	0.554078	0.839243
H376.IIB.52.CBC	H376.IIB.52	12 pcw	F	stage1	0.0241572	0.126959	0	0	0.0235911	0.188196	0	0.123858	0	0	0.00360276	0.328289	0	0	0.174407	0.00647531	0.0005	0	0.456334	0.910312
H376.IIB.52.MD	H376.IIB.52	12 pcw	F	stage1	0	0.153403	0	0.0554486	0.0375988	0.189754	0	0.0541869	0	0	0.00481442	0.247865	0	0	0.235769	0.02116	0	0	0.49562	0.875023
H376.IIIA.50.AMY	H376.IIIA.50	13 pcw	M	stage2	0.0109068	0.289768	0	0	0.0834823	0.143665	0	0	0	0	0	0.364701	0	0	0.101671	0.00580671	0	0	0.511841	0.879943
H376.IIIA.50.STC	H376.IIIA.50	13 pcw	M	stage2	0	0.194367	0	0	0.0819554	0.176273	0	0.03393	0	0	0	0.401125	0	0	0.103223	0.00912599	0	0	0.509629	0.88088
H376.IIIA.50.MFC	H376.IIIA.50	13 pcw	M	stage2	0.00773534	0.190565	0	0.00838446	0.0190151	0.193666	0	0	0	0	0	0.415835	0	0	0.153239	0.0115602	0	0	0.51514	0.875295
H376.IIIA.50.DFC	H376.IIIA.50	13 pcw	M	stage2	0	0.187354	0	0	0.0474284	0.205137	0	0	0	0	0	0.42703	0	0	0.121888	0.0111625	0	0	0.543593	0.854683
H376.IIIA.50.OFC	H376.IIIA.50	13 pcw	M	stage2	0	0.253718	0	0.0221151	0.0633391	0.167103	0	0.00107258	0	0	0	0.355283	0	0	0.115635	0.0217337	0	0	0.513359	0.874607
H376.IIIA.50.ITC	H376.IIIA.50	13 pcw	M	stage2	0.00885443	0.313909	0	0	0.0762592	0.121116	0	0	0	0	0	0.374287	0	0	0.100802	0.0047727	0	0	0.498691	0.891795
H376.IIIA.50.HIP	H376.IIIA.50	13 pcw	M	stage2	0.0201548	0.247773	0	0	0.0874451	0.206324	0	0.0788659	0	0.00369977	0	0.248137	0	0	0.09133	0.0133206	0.0029501	0	0.467438	0.910195
H376.IIIA.50.VFC	H376.IIIA.50	13 pcw	M	stage2	0	0.186856	0	0.0302888	0.0369742	0.150304	0	0	0	0	0	0.445334	0	0	0.138067	0.0121764	0	0	0.521696	0.872335
H376.IIIA.50.A1C	H376.IIIA.50	13 pcw	M	stage2	0.0120591	0.189	0	0	0.108786	0.263046	0	0.0735006	0	0	0	0.264482	0	0	0.0792496	0.00987642	0	0	0.503953	0.883115
H376.IIIA.50.V1C	H376.IIIA.50	13 pcw	M	stage2	0	0.223564	0	0	0.0867578	0.209782	0	0.00468499	0	0	0	0.34236	0	0	0.125295	0.007556	0	0	0.525698	0.864677
H376.IIIA.50.STR	H376.IIIA.50	13 pcw	M	stage2	0	0.214124	0	0	0.0424014	0.208896	0	0.0507697	0	0	0	0.338045	0	0	0.124359	0.0214042	0	0	0.493123	0.888759
H376.IIIA.50.M1C	H376.IIIA.50	13 pcw	M	stage2	0	0.138457	0	0.0195432	0.0213536	0.167918	0	0	0	0	0	0.493211	0	0	0.147416	0.0121008	0	0	0.57097	0.834956
H376.IIIA.50.IPC	H376.IIIA.50	13 pcw	M	stage2	0	0.146521	0	0	0.0450692	0.166121	0	0.0140989	0	0	0	0.494479	0	0	0.123088	0.0106235	0	0	0.561073	0.844395
H376.IIIA.50.S1C	H376.IIIA.50	13 pcw	M	stage2	0.00326261	0.171328	0	0.00324747	0.035282	0.17971	0	0.0187	0	0	0	0.437309	0	0	0.137616	0.0135437	0	0	0.533833	0.861749
H376.IIIA.50.CBC	H376.IIIA.50	13 pcw	M	stage2	0.0224743	0.253803	0	0	0.0776408	0.16253	0	0.0432844	0	0.0327853	0	0.308104	0	0	0.0962567	0.00312227	0	0	0.50174	0.881792
H376.IIIA.50.MD	H376.IIIA.50	13 pcw	M	stage2	0	0.18944	0	0.0181117	0.0586945	0.163541	0	0.0188035	0	0	0	0.312459	0	0	0.207227	0.0297526	0.00197132	0	0.503827	0.872317
H376.IIIA.51.AMY	H376.IIIA.51	13 pcw	F	stage2	0.00579541	0.3508	0	0	0.048823	0.150287	0	0.113717	0	0.00480634	0	0.240948	0	0	0.0764274	0.0083956	0	0	0.458979	0.925865
H376.IIIA.51.STC	H376.IIIA.51	13 pcw	F	stage2	0.00214902	0.235383	0	0.00838667	0.0483198	0.279222	0	0.145779	0	0	0	0.180846	0	0	0.090882	0.00903296	0	0	0.523768	0.871094
H376.IIIA.51.MFC	H376.IIIA.51	13 pcw	F	stage2	0.0203423	0.271494	0	0.0691284	0.026154	0.0956918	0	0	0	0	0	0.409677	0	0	0.101142	0.00637013	0	0	0.519232	0.875789
H376.IIIA.51.DFC	H376.IIIA.51	13 pcw	F	stage2	0.0103608	0.314058	0	0.110478	0.0285386	0.0700819	0	0	0	0	0	0.355297	0	0	0.100458	0.0107274	0	0	0.552417	0.845696
H376.IIIA.51.OFC	H376.IIIA.51	13 pcw	F	stage2	0.0187917	0.321104	0	0.127026	0.0351991	0.0278484	0	0	0	0	0	0.37292	0	0	0.089574	0.00753664	0	0	0.536544	0.86012
H376.IIIA.51.ITC	H376.IIIA.51	13 pcw	F	stage2	0.00162886	0.230112	0	0.0416111	0.0225407	0.148461	0	0.225226	0	0	0	0.221097	0	0	0.101206	0.0081181	0	0	0.528898	0.864313
H376.IIIA.51.HIP	H376.IIIA.51	13 pcw	F	stage2	0.0266344	0.393672	0	0	0.0801589	0.156471	0	0.0580389	0	0.00433107	0	0.194112	0	0	0.0850505	0	0.00153162	0	0.469941	0.919404
H376.IIIA.51.VFC	H376.IIIA.51	13 pcw	F	stage2	0.00657876	0.279104	0	0.108598	0.00778428	0.109588	0	0	0	0	0	0.395167	0	0	0.0794158	0.0137642	0	0	0.502268	0.889891
H376.IIIA.51.A1C	H376.IIIA.51	13 pcw	F	stage2	0	0.228668	0	0	0.0658414	0.200578	0	0.120354	0	0	0	0.234312	0	0	0.126643	0.0236036	0	0	0.415314	0.943228
H376.IIIA.51.V1C	H376.IIIA.51	13 pcw	F	stage2	0.0342934	0.325817	0	0.0294057	0.00250612	0.136765	0	0.0994934	0	0	0	0.249675	0	0	0.121522	0.0005	0	0	0.490099	0.896184
H376.IIIA.51.STR	H376.IIIA.51	13 pcw	F	stage2	0.0168075	0.366634	0	0	0.0187826	0.129254	0	0.123576	0	0	0	0.226709	0	0	0.109333	0.00890424	0	0	0.434992	0.941847
H376.IIIA.51.M1C	H376.IIIA.51	13 pcw	F	stage2	0.0113268	0.282599	0	0.11428	0.0192997	0.0888561	0	0	0	0	0	0.376322	0	0	0.0939743	0.0133424	0	0	0.526066	0.867883
H376.IIIA.51.IPC	H376.IIIA.51	13 pcw	F	stage2	0.00698794	0.317733	0	0.105872	0.0311801	0.120959	0	0.0313959	0	0	0	0.272379	0	0	0.0938042	0.0196885	0	0	0.495582	0.889117
H376.IIIA.51.S1C	H376.IIIA.51	13 pcw	F	stage2	0.0160068	0.26663	0	0.073078	0	0.103418	0	0.00333602	0	0	0	0.421706	0	0	0.102891	0.0129344	0	0	0.502178	0.89
H376.IIIA.51.CBC	H376.IIIA.51	13 pcw	F	stage2	0.025301	0.311856	0	0	0.0829989	0.168101	0	0.121212	0	0.0155396	0	0.219666	0.00299032	0	0.0523353	0	0	0	0.43674	0.944111
H376.IIIA.51.MD	H376.IIIA.51	13 pcw	F	stage2	0.0122081	0.161796	0	0	0.0244863	0.221176	0	0.148125	0	0	0	0.198608	0	0	0.210024	0.0235763	0	0	0.360178	0.968687
H376.IIIA.52.AMY	H376.IIIA.52	13 pcw	M	stage2	0	0.320979	0	0	0.101057	0.23815	0	0	0	0.00355608	0.00118	0.248881	0	0	0.0801718	0.00589988	0.0001	0	0.470307	0.913611
H376.IIIA.52.STC	H376.IIIA.52	13 pcw	M	stage2	0	0.26369	0	0	0.104253	0.250408	0	0	0	0	0	0.293442	0	0	0.0877844	0.0004	0	0	0.532237	0.863291
H376.IIIA.52.MFC	H376.IIIA.52	13 pcw	M	stage2	0.00757199	0.285708	0	0	0.109421	0.343713	0	0	0	0	0.00106111	0.175711	0	0	0.0736562	0.00315761	0	0	0.541198	0.859366
H376.IIIA.52.DFC	H376.IIIA.52	13 pcw	M	stage2	0	0.198612	0	0.0243839	0.0759129	0.327314	0	0	0	0	0.00606884	0.271416	0	0	0.0811893	0.0151034	0	0	0.55169	0.844462
H376.IIIA.52.OFC	H376.IIIA.52	13 pcw	M	stage2	0	0.249746	0	0	0.101564	0.349063	0	0.0105176	0	0	0.00486344	0.184932	0	0	0.0863532	0.0129613	0	0	0.54877	0.848673
H376.IIIA.52.ITC	H376.IIIA.52	13 pcw	M	stage2	0	0.209286	0	0	0.121236	0.285346	0	0.0583646	0	0	0.0003	0.226669	0	0	0.0975253	0.00130116	0	0	0.554405	0.842643
H376.IIIA.52.HIP	H376.IIIA.52	13 pcw	M	stage2	0	0.358556	0	0	0.0923814	0.270964	0	0	0	0.00335932	0.00364303	0.190147	0	0	0.0773024	0.00233713	0.00131022	0	0.493689	0.899178
H376.IIIA.52.VFC	H376.IIIA.52	13 pcw	M	stage2	0	0.222782	0	0.0217731	0.073548	0.329794	0	0.013021	0	0	0.0001	0.238941	0	0	0.0778036	0.0222085	0	0	0.529128	0.86341
H376.IIIA.52.A1C	H376.IIIA.52	13 pcw	M	stage2	0	0.249292	0	0.00323792	0.0933612	0.275738	0	0.0174576	0	0	0.0001	0.233112	0	0	0.1086	0.0190947	0	0	0.503616	0.881041
H376.IIIA.52.V1C	H376.IIIA.52	13 pcw	M	stage2	0	0.357972	0	0	0.0821185	0.20331	0	0	0	0	0	0.276039	0	0	0.0785307	0.00202978	0	0	0.488751	0.902572
H376.IIIA.52.STR	H376.IIIA.52	13 pcw	M	stage2	0.0109064	0.127503	0	0	0	0.340661	0	0.207811	0	0	0.00713751	0.188567	0	0	0.117252	0	0.0002	0	0.499001	0.886004
H376.IIIA.52.M1C	H376.IIIA.52	13 pcw	M	stage2	0	0.259989	0	0.0300944	0.0432779	0.228055	0	0	0	0	0.00472075	0.330136	0	0	0.0905478	0.0131784	0	0	0.52989	0.864103
H376.IIIA.52.IPC	H376.IIIA.52	13 pcw	M	stage2	0	0.274215	0	0	0.0573976	0.260092	0	0.0217249	0	0	0.00261735	0.280137	0	0	0.0943582	0.00945799	0	0	0.513277	0.877651
H376.IIIA.52.S1C	H376.IIIA.52	13 pcw	M	stage2	0	0.237145	0	0.00526047	0.087771	0.296643	0	0	0	0	0.0004	0.264017	0	0	0.085691	0.0231189	0	0	0.53664	0.856692
H376.IIIA.52.CBC	H376.IIIA.52	13 pcw	M	stage2	0	0.240387	0	0	0.0968341	0.254954	0	0	0	0.00360301	0.016509	0.190452	0	0	0.185361	0.0118987	0	0	0.451224	0.91002
H376.IIIA.52.MD	H376.IIIA.52	13 pcw	M	stage2	0	0.221619	0	0	0.0770271	0.293296	0	0	0	0.00642598	0.0104707	0.264564	0	0	0.113641	0.0129556	0	0	0.523624	0.863727
H376.IIIB.50.AMY	H376.IIIB.50	13 pcw	M	stage2	0.00969132	0.30418	0	0	0.0946334	0.0741996	0	0.0422027	0	0.0077941	0.0006	0.333477	0	0	0.117835	0.0153992	0	0	0.482828	0.896773
H376.IIIB.50.STC	H376.IIIB.50	16 pcw	M	stage2	0.00101077	0.205688	0	0	0.0908937	0.221119	0	0.176137	0	0	0.0047427	0.208948	0	0	0.0803337	0.0111277	0	0	0.471034	0.909985
H376.IIIB.50.MFC	H376.IIIB.50	16 pcw	M	stage2	0	0.308827	0	0	0.115651	0.25459	0	0.124243	0	0.00531165	0.00276691	0.132671	0	0	0.0502105	0.00572889	0	0	0.472538	0.922611
H376.IIIB.50.DFC	H376.IIIB.50	16 pcw	M	stage2	0	0.30803	0	0	0.0854198	0.233747	0	0.11857	0	0.00114998	0.00414593	0.154613	0	0	0.0779863	0.0163374	0	0	0.45493	0.928639
H376.IIIB.50.OFC	H376.IIIB.50	16 pcw	M	stage2	0.00373864	0.214821	0	0.00145137	0.0554898	0.199449	0	0.158985	0	0	0	0.232909	0	0	0.124165	0.00899097	0	0	0.426838	0.937967
H376.IIIB.50.ITC	H376.IIIB.50	16 pcw	M	stage2	0	0.257684	0	0	0.069234	0.229702	0	0.113018	0	0	0.00746523	0.20199	0	0	0.0967579	0.02415	0	0	0.462872	0.913451
H376.IIIB.50.HIP	H376.IIIB.50	16 pcw	M	stage2	0.0008	0.230534	0	0	0.0819835	0.155074	0	0.0912816	0	0.0231722	0.0108943	0.287332	0	0	0.103205	0.0157527	0	0	0.484562	0.891392
H376.IIIB.50.VFC	H376.IIIB.50	16 pcw	M	stage2	0.00373204	0.193405	0	0	0.0497126	0.191441	0	0.181135	0	0	0.00539489	0.224558	0	0	0.128459	0.0221616	0	0	0.410109	0.945534
H376.IIIB.50.A1C	H376.IIIB.50	16 pcw	M	stage2	0	0.155784	0	0	0.104183	0.185644	0	0.133986	0	0	0.00344952	0.310253	0	0	0.0953456	0.0113555	0	0	0.423408	0.93976
H376.IIIB.50.V1C	H376.IIIB.50	16 pcw	M	stage2	0	0.193571	0	0	0.119382	0.265322	0	0.139308	0	0	0	0.207346	0	0	0.074848	0.0002	0	0	0.455454	0.924169
H376.IIIB.50.STR	H376.IIIB.50	16 pcw	M	stage2	0.0156166	0.205045	0	0	0.0410472	0.175794	0	0.104053	0	0	0	0.236003	0	0	0.204237	0.018204	0	0	0.439757	0.917747
H376.IIIB.50.M1C	H376.IIIB.50	16 pcw	M	stage2	0.00116935	0.260512	0	0	0.063403	0.224624	0	0.111549	0	0	0.00663484	0.19247	0	0	0.106549	0.0263784	0.00671054	0	0.445165	0.924255
H376.IIIB.50.IPC	H376.IIIB.50	16 pcw	M	stage2	0	0.187117	0	0	0.114393	0.187257	0	0.117022	0	0	0.0006	0.279574	0	0	0.103389	0.0106534	0	0	0.46276	0.910934
H376.IIIB.50.S1C	H376.IIIB.50	16 pcw	M	stage2	0	0.262822	0	0	0.0633738	0.201538	0	0.0907174	0	0	0.00448861	0.240494	0	0	0.104002	0.0317499	0.0008	0	0.457278	0.914941
H376.IIIB.50.CBC	H376.IIIB.50	16 pcw	M	stage2	0	0.24173	0	0	0.105274	0.247873	0	0.148836	0	0.0257326	0.0118129	0.0638581	0	0	0.129817	0.02061	0.00445715	0	0.397574	0.957588
H376.IIIB.50.MD	H376.IIIB.50	16 pcw	M	stage2	0.0213662	0.122857	0	0	0.153266	0.125184	0	0.202098	0	0.0120867	0.00429184	0.089224	0	0.00733976	0.224831	0.0374547	0	0	0.371957	0.952767
H376.IIIB.51.AMY	H376.IIIB.51	16 pcw	M	stage2	0.00642303	0.245949	0	0	0.0900834	0.183013	0	0.125511	0	0.00741096	0.0038732	0.251258	0	0	0.0864782	0	0	0	0.406792	0.95746
H376.IIIB.51.STC	H376.IIIB.51	16 pcw	M	stage2	0	0.122991	0	0	0.11257	0.128478	0	0.12272	0	0	0.00462607	0.417845	0	0	0.0884889	0.00228106	0	0	0.447923	0.927637
H376.IIIB.51.MFC	H376.IIIB.51	16 pcw	M	stage2	0.0172044	0.268371	0	0.0291627	0.0042102	0.0458728	0	0	0	0.00166184	0	0.551743	0	0	0.0737496	0.00802496	0	0	0.528939	0.884129
H376.IIIB.51.DFC	H376.IIIB.51	16 pcw	M	stage2	0	0.226833	0.0217945	0.0283329	0.0198026	0.0642607	0	0	0	0	0.00747169	0.561964	0	0	0.0503638	0.0191768	0	0	0.515637	0.895264
H376.IIIB.51.OFC	H376.IIIB.51	16 pcw	M	stage2	0	0.238748	0.0162206	0.0355265	0.0194077	0.0719056	0	0	0	0.00233944	0.0005	0.537523	0	0	0.0587488	0.0190764	0	0	0.522888	0.885895
H376.IIIB.51.ITC	H376.IIIB.51	16 pcw	M	stage2	0.00575377	0.128391	0	0.0156448	0.0167447	0.0754634	0	0.122419	0	0	0	0.47075	0	0	0.15542	0.00941343	0	0	0.485625	0.899621
H376.IIIB.51.HIP	H376.IIIB.51	16 pcw	M	stage2	0.0112683	0.215243	0	0	0.0403975	0.155956	0	0.0173956	0	0.00648566	0	0.414222	0	0	0.133004	0.00602897	0	0	0.477223	0.905534
H376.IIIB.51.VFC	H376.IIIB.51	16 pcw	M	stage2	0	0.168064	0.00321373	0.0516393	0.0064143	0.116461	0	0.0329119	0	0	0.00254699	0.512646	0	0	0.0753038	0.0308001	0	0	0.536497	0.867922
H376.IIIB.51.A1C	H376.IIIB.51	16 pcw	M	stage2	0	0.161884	0	0.0269661	0.0464136	0.192573	0	0	0	0	0.00577067	0.489773	0	0	0.0302945	0.0463248	0	0	0.535769	0.868169
H376.IIIB.51.V1C	H376.IIIB.51	16 pcw	M	stage2	0	0.26312	0	0	0.0648914	0.126706	0	0.0247366	0	0.00440305	0.00247032	0.451293	0	0	0.0623792	0	0	0	0.492642	0.904359
H376.IIIB.51.STR	H376.IIIB.51	16 pcw	M	stage2	0.013021	0.136033	0	0	0.00965411	0.21487	0	0.0940952	0	0	0	0.310994	0	0	0.189251	0.0320813	0	0	0.420215	0.931787
H376.IIIB.51.M1C	H376.IIIB.51	16 pcw	M	stage2	0	0.163271	0	0.0890211	0.00153869	0.0585371	0	0	0	0	0.0009	0.571982	0	0	0.0946499	0.0200586	0	0	0.564319	0.851117
H376.IIIB.51.IPC	H376.IIIB.51	16 pcw	M	stage2	0	0.127867	0	0	0.0804293	0.165354	0	0.0391892	0	0	0.0007	0.483676	0	0	0.0948049	0.00802615	0	0	0.512672	0.884547
H376.IIIB.51.S1C	H376.IIIB.51	16 pcw	M	stage2	0	0.145277	0	0.0165104	0.0747681	0.144018	0	0.0264228	0	0	0.00440877	0.487026	0	0	0.0917634	0.00980605	0	0	0.518768	0.879754
H376.IIIB.51.CBC	H376.IIIB.51	16 pcw	M	stage2	0.0222462	0.339091	0	0	0.0399409	0.139427	0	0.177007	0	0.0140239	0.0213	0.11973	0	0	0.122257	0	0.00497599	0	0.425037	0.945954
H376.IIIB.51.MD	H376.IIIB.51	16 pcw	M	stage2	0	0.154931	0	0.0155378	0.00412381	0.0884511	0	0.0002	0	0	0.00423384	0.435075	0	0	0.227734	0.0696783	0	0	0.377727	0.9662
H376.IIIB.52.AMY	H376.IIIB.52	16 pcw	M	stage2	0	0.123269	0	0	0.0596969	0.169967	0	0.0592656	0	0	0	0.366608	0	0	0.198647	0.0225468	0	0	0.521791	0.861532
H376.IIIB.52.STC	H376.IIIB.52	16 pcw	M	stage2	0	0.171726	0	0	0.0732777	0.170568	0	0.0540806	0	0	0.0068979	0.363263	0	0	0.138366	0.0218216	0	0	0.470244	0.903045
H376.IIIB.52.MFC	H376.IIIB.52	16 pcw	M	stage2	0	0.138167	0	0	0.08533	0.246319	0	0.106532	0	0.00173386	0.00967576	0.12368	0	0	0.240477	0.0480855	0	0	0.387721	0.941894
H376.IIIB.52.DFC	H376.IIIB.52	16 pcw	M	stage2	0	0.186598	0	0	0.0416365	0.375927	0	0	0	0	0.00893682	0.231497	0	0	0.128979	0.0264253	0	0	0.491525	0.886288
H376.IIIB.52.OFC	H376.IIIB.52	16 pcw	M	stage2	0.0147984	0.149251	0	0.00232138	0.0405198	0.237805	0	0.0878631	0	0	0.00432159	0.237138	0	0	0.196722	0.028849	0.0004	0	0.449571	0.908694
H376.IIIB.52.ITC	H376.IIIB.52	16 pcw	M	stage2	0	0.145448	0	0	0.0398714	0.235774	0	0.0943766	0	0	0.00430117	0.309644	0	0	0.155205	0.0153794	0	0	0.458261	0.909399
H376.IIIB.52.HIP	H376.IIIB.52	16 pcw	M	stage2	0.0189387	0.339166	0	0	0.132597	0.118399	0	0	0.0445016	0.00598992	0.0073453	0.288378	0.0168581	0	0.0277254	0	0.0001	0	0.473153	0.911777
H376.IIIB.52.VFC	H376.IIIB.52	16 pcw	M	stage2	0	0.205325	0	0.0325654	0.0372748	0.183628	0	0	0	0	0.00958716	0.334772	0	0	0.168799	0.0280489	0	0	0.453225	0.912051
H376.IIIB.52.A1C	H376.IIIB.52	16 pcw	M	stage2	0	0.206038	0	0.0155899	0.077346	0.218061	0	0.0241498	0	0	0.00457241	0.286788	0	0	0.142019	0.025436	0	0	0.466648	0.903037
H376.IIIB.52.V1C	H376.IIIB.52	16 pcw	M	stage2	0	0.227995	0	0.00413512	0.0577291	0.357789	0	0.0551594	0	0	0.0158137	0.15956	0	0	0.103433	0.0183865	0	0	0.466841	0.909951
H376.IIIB.52.STR	H376.IIIB.52	16 pcw	M	stage2	0.0153581	0.145964	0	0	0.0401958	0.201528	0	0.0541001	0	0.00212057	0	0.243424	0	0	0.256859	0.0404501	0	0	0.466473	0.892963
H376.IIIB.52.M1C	H376.IIIB.52	16 pcw	M	stage2	0	0.210589	0	0.0134771	0.0323863	0.182644	0	0	0	0	0.00538277	0.337714	0	0	0.18817	0.0296371	0	0	0.465338	0.902998
H376.IIIB.52.IPC	H376.IIIB.52	16 pcw	M	stage2	0	0.202925	0	0.00718642	0.06315	0.13152	0	0.0477907	0	0	0.00115788	0.374904	0	0	0.14415	0.0272169	0	0	0.416741	0.942465
H376.IIIB.52.S1C	H376.IIIB.52	16 pcw	M	stage2	0	0.210589	0	0.0134771	0.0323863	0.182644	0	0	0	0	0.00538277	0.337714	0	0	0.18817	0.0296371	0	0	0.465338	0.902998
H376.IIIB.52.CBC	H376.IIIB.52	16 pcw	M	stage2	0.00299514	0.208967	0	0	0.104583	0.241331	0	0.0896607	0	0.0285359	0.00190785	0.142586	0	0	0.160811	0.0139081	0.00471357	0	0.422278	0.930212
H376.IIIB.52.MD	H376.IIIB.52	16 pcw	M	stage2	0.0219975	0.116074	0	0	0.0608552	0.160795	0	0.116583	0	0	0	0.11134	0	0	0.363338	0.0490178	0	0	0.326715	0.969773
H376.IIIB.53.AMY	H376.IIIB.53	17 pcw	F	stage2	0.00763438	0.325341	0	0	0.110332	0.0634761	0	0.0435674	0	0.00386741	0	0.349345	0	0	0.0920477	0.00438909	0	0	0.485761	0.900197
H376.IIIB.53.STC	H376.IIIB.53	17 pcw	F	stage2	0	0.186179	0	0	0.108108	0.168067	0	0.0823334	0	0	0	0.32389	0	0	0.126776	0.0046462	0	0	0.455161	0.915802
H376.IIIB.53.MFC	H376.IIIB.53	17 pcw	F	stage2	0	0.202151	0	0.0467838	0.0467145	0.166146	0	0.0263508	0	0	0	0.278858	0	0	0.214693	0.0183037	0	0	0.46223	0.901448
H376.IIIB.53.DFC	H376.IIIB.53	17 pcw	F	stage2	0	0.229346	0	0.0435569	0.0404436	0.165825	0	0.064961	0	0	0.0004	0.276979	0	0	0.157606	0.0208934	0	0	0.393752	0.954029
H376.IIIB.53.OFC	H376.IIIB.53	17 pcw	F	stage2	0	0.175596	0	0.0120103	0.0627784	0.141184	0	0.0356745	0	0	0	0.355197	0	0	0.194203	0.0233561	0	0	0.480416	0.892058
H376.IIIB.53.ITC	H376.IIIB.53	17 pcw	F	stage2	0	0.227981	0	0.0107485	0.102022	0.153997	0	0.0132375	0	0	0	0.291159	0	0	0.181525	0.0193301	0	0	0.479886	0.891407
H376.IIIB.53.HIP	H376.IIIB.53	17 pcw	F	stage2	0	0.170148	0	0	0.132365	0.192386	0	0.147172	0	0.0116432	0.00402056	0.146772	0	0	0.191579	0.00251315	0.00140157	0	0.331538	0.988727
H376.IIIB.53.VFC	H376.IIIB.53	17 pcw	F	stage2	0.010251	0.258993	0	0	0.0554917	0.098522	0	0.103946	0	0	0	0.318193	0	0	0.138391	0.0162118	0	0	0.405347	0.951409
H376.IIIB.53.A1C	H376.IIIB.53	17 pcw	F	stage2	0	0.11261	0	0.0183071	0.0695303	0.187772	0	0.109144	0	0	0	0.319288	0	0	0.165504	0.0178445	0	0	0.474865	0.895158
H376.IIIB.53.V1C	H376.IIIB.53	17 pcw	F	stage2	0.009949	0.279938	0	0	0.0655489	0.158145	0	0.0836417	0	0.0004	0	0.295981	0	0	0.100429	0.00593724	0	0	0.415414	0.951774
H376.IIIB.53.STR	H376.IIIB.53	17 pcw	F	stage2	0.0140383	0.191552	0	0	0.113374	0.164869	0	0.143172	0	0.0154189	0.0025982	0.0876389	0	0	0.254753	0.0125862	0	0	0.360411	0.964482
H376.IIIB.53.M1C	H376.IIIB.53	17 pcw	F	stage2	0	0.196885	0	0.0687251	0.0442465	0.148756	0	0.0422632	0	0	0	0.269095	0	0	0.208698	0.0213306	0	0	0.445968	0.911832
H376.IIIB.53.IPC	H376.IIIB.53	17 pcw	F	stage2	0	0.122496	0	0.0782542	0.0519003	0.244207	0	0	0	0	0	0.298058	0	0	0.175527	0.0295569	0	0	0.526102	0.856413
H376.IIIB.53.S1C	H376.IIIB.53	17 pcw	F	stage2	0	0.196885	0	0.0687251	0.0442465	0.148756	0	0.0422632	0	0	0	0.269095	0	0	0.208698	0.0213306	0	0	0.445968	0.911832
H376.IIIB.53.CBC	H376.IIIB.53	17 pcw	F	stage2	0	0.194414	0	0	0.168675	0.18694	0	0.0961017	0	0.0165558	0.0133413	0.134783	0	0	0.178359	0.00588387	0.00494721	0	0.405146	0.939034
H376.IIIB.53.MD	H376.IIIB.53	17 pcw	F	stage2	0.0083471	0.063342	0	0	0.126704	0.167849	0	0.173626	0	0.00646182	0	0.090052	0	0	0.323863	0.0397556	0	0	0.309263	0.980596
H376.IV.53.AMY	H376.IV.53	19 pcw	F	stage2	0.0249729	0	0	0	0.120142	0.26707	0	0.256781	0	0.0105068	0.00657339	0.209724	0	0	0.104229	0	0	0	0.447263	0.916528
H376.IV.53.STC	H376.IV.53	19 pcw	F	stage2	0.00204314	0.0800093	0	0	0.0589766	0.232444	0	0.243578	0	0	0.00300587	0.232131	0	0	0.145265	0.00254683	0	0	0.451993	0.91365
H376.IV.53.MFC	H376.IV.53	19 pcw	F	stage2	0.00840595	0.210306	0	0.0344971	0.084845	0.134984	0	0.15451	0	0.00209442	0	0.222193	0	0	0.14503	0.00313348	0	0	0.427641	0.932802
H376.IV.53.DFC	H376.IV.53	19 pcw	F	stage2	0	0.229363	0	0	0.0298338	0.22426	0	0.150271	0	0	0.00320891	0.238606	0	0	0.122911	0.00154696	0	0	0.446156	0.92631
H376.IV.53.OFC	H376.IV.53	19 pcw	F	stage2	0.0297077	0.123835	0	0	0.0488556	0.225136	0	0.211357	0	0.00453736	0.00577441	0.20396	0	0	0.145007	0.0018303	0	0	0.416057	0.939739
H376.IV.53.ITC	H376.IV.53	19 pcw	F	stage2	0	0.26274	0	0	0.0836224	0.163547	0	0.103002	0	0	0	0.237084	0	0	0.13321	0.0167943	0	0	0.435939	0.929252
H376.IV.53.HIP	H376.IV.53	19 pcw	F	stage2	0.0209573	0.164393	0	0	0.11834	0.220987	0	0.144282	0	0.0240023	0.0219451	0.107201	0	0	0.17112	0.00539029	0.00138165	0	0.390371	0.950073
H376.IV.53.VFC	H376.IV.53	19 pcw	F	stage2	0.0062504	0.190094	0	0.0314512	0.0383053	0.192275	0	0.123109	0	0	0	0.253421	0	0	0.150897	0.0141974	0	0	0.410096	0.943585
H376.IV.53.A1C	H376.IV.53	19 pcw	F	stage2	0	0.0704715	0	0.0594856	0.0594166	0.212104	0	0.218201	0	0	0.00908912	0.227331	0	0	0.141521	0.00237953	0	0	0.458025	0.907074
H376.IV.53.V1C	H376.IV.53	19 pcw	F	stage2	0	0.109607	0	0.00243286	0.0673101	0.249564	0	0.317924	0	0	0.00464891	0.174959	0	0	0.0735546	0	0	0	0.43053	0.944427
H376.IV.53.STR	H376.IV.53	19 pcw	F	stage2	0.0282674	0.244296	0	0	0.0579419	0.191636	0	0.0637033	0	0.0181122	0.00255573	0.248427	0	0	0.140167	0.00419398	0.0007	0	0.425714	0.933901
H376.IV.53.M1C	H376.IV.53	19 pcw	F	stage2	0	0.0290561	0	0	0.0739002	0.332038	0	0.297964	0	0	0.00462183	0.158692	0	0	0.0969813	0.00674664	0	0	0.430627	0.93602
H376.IV.53.IPC	H376.IV.53	19 pcw	F	stage2	0	0	0	0.0272674	0.0702318	0.250976	0	0.371131	0	0	0.00607841	0.171383	0	0	0.0966627	0.00626991	0	0	0.442863	0.924982
H376.IV.53.S1C	H376.IV.53	19 pcw	F	stage2	0	0.0290561	0	0	0.0739002	0.332038	0	0.297964	0	0	0.00462183	0.158692	0	0	0.0969813	0.00674664	0	0	0.430627	0.93602
H376.IV.53.CBC	H376.IV.53	19 pcw	F	stage2	0	0	0	0	0.0687075	0.338552	0	0.28481	0	0.0229001	0.0219659	0.135627	0	0.00251452	0.124922	0	0	0	0.412248	0.938366
H376.IV.53.MD	H376.IV.53	19 pcw	F	stage2	0.026612	0.122949	0	0	0.158775	0.121316	0	0.231463	0	0.00510316	0	0.10707	0	0	0.211416	0.0152957	0	0	0.314726	0.996429
H376.IV.54.AMY	H376.IV.54	21 pcw	M	stage2	0	0.14582	0	0	0.102465	0.150436	0	0.0539444	0	0.00760553	0.0120323	0.257843	0	0	0.239374	0.0304804	0	0	0.454074	0.900564
H376.IV.54.STC	H376.IV.54	21 pcw	M	stage2	0	0.196322	0	0.0221371	0.0662895	0.180147	0	0.0380417	0	0.0007	0.00717039	0.238443	0	0	0.223784	0.0270147	0	0	0.41486	0.929734
H376.IV.54.MFC	H376.IV.54	21 pcw	M	stage2	0	0.173507	0	0.046392	0.0416851	0.186103	0	0.00801813	0	0	0	0.212206	0	0	0.281164	0.0509252	0	0	0.405087	0.929774
H376.IV.54.DFC	H376.IV.54	21 pcw	M	stage2	0	0.190918	0	0.0202612	0.0923319	0.13566	0	0.0722941	0	0	0.0008	0.24673	0	0	0.197461	0.0435688	0	0	0.417974	0.927721
H376.IV.54.OFC	H376.IV.54	21 pcw	M	stage2	0	0.165141	0	0.0738948	0.0279622	0.207434	0	0.039912	0	0	0.00174488	0.197504	0	0	0.251322	0.0350855	0	0	0.410775	0.928774
H376.IV.54.ITC	H376.IV.54	21 pcw	M	stage2	0	0.167105	0	0.0618945	0.0407382	0.187209	0	0	0	0	0	0.238516	0	0	0.26732	0.037217	0	0	0.441861	0.908836
H376.IV.54.HIP	H376.IV.54	21 pcw	M	stage2	0.00995521	0.158733	0	0	0.110117	0.150512	0	0.0435532	0	0.0350058	0.00149267	0.156929	0	0	0.319609	0.0140939	0	0	0.392156	0.933969
H376.IV.54.VFC	H376.IV.54	21 pcw	M	stage2	0.00636372	0.137594	0	0	0.105648	0.102153	0	0.0721792	0	0.0193365	0.00511773	0.323605	0	0	0.21385	0.014152	0	0	0.46457	0.89734
H376.IV.54.A1C	H376.IV.54	21 pcw	M	stage2	0	0.12569	0	0	0.072179	0.181292	0	0.0655974	0	0	0	0.262292	0	0	0.26598	0.0269687	0	0	0.435376	0.913907
H376.IV.54.V1C	H376.IV.54	21 pcw	M	stage2	0	0.144284	0	0.0579974	0.0445631	0.162587	0	0.0778502	0	0	0	0.291565	0	0	0.193919	0.0272339	0	0	0.429608	0.922984
H376.IV.54.STR	H376.IV.54	21 pcw	M	stage2	0	0.170435	0	0	0.0341193	0.254114	0	0.102636	0	0.0132101	0	0.149017	0	0	0.235957	0.0405114	0	0	0.365828	0.95818
H376.IV.54.M1C	H376.IV.54	21 pcw	M	stage2	0	0.14923	0	0	0.0303858	0.247228	0	0.0443877	0	0	0	0.267517	0	0	0.220108	0.0411436	0	0	0.466137	0.896249
H376.IV.54.IPC	H376.IV.54	21 pcw	M	stage2	0	0.161768	0	0	0.0341595	0.24451	0	0.048172	0	0	0.00158209	0.215074	0	0	0.2639	0.0308343	0	0	0.393474	0.941062
H376.IV.54.S1C	H376.IV.54	21 pcw	M	stage2	0.0104146	0.113274	0	0.0717992	0.0259596	0.187269	0	0.0275205	0	0	0	0.252085	0	0	0.274359	0.0373193	0	0	0.445327	0.905856
H376.IV.54.CBC	H376.IV.54	21 pcw	M	stage2	0	0.36383	0	0	0.17905	0.060012	0	0.00699151	0	0.0291937	0.0147129	0.144117	0	0	0.163031	0.0370002	0.00206219	0	0.370125	0.961948
H376.IV.54.MD	H376.IV.54	21 pcw	M	stage2	0.0172701	0.0757767	0	0.0495676	0.0466065	0.160445	0	0.0558654	0	0	0	0.156854	0	0	0.426487	0.011128	0	0	0.406167	0.924612
H376.IV.50.AMY	H376.IV.50	24 pcw	M	stage2	0.0117936	0.223496	0	0	0.144163	0.282159	0	0.0112986	0	0.0164126	0.00936985	0.218649	0	0	0.0684855	0.0141728	0	0	0.41585	0.946055
H376.IV.50.STC	H376.IV.50	24 pcw	M	stage2	0.00127336	0.137031	0	0	0.063394	0.2309	0	0.111729	0	0	0.0123968	0.212374	0	0	0.221906	0.00899476	0	0	0.426017	0.923141
H376.IV.50.MFC	H376.IV.50	24 pcw	M	stage2	0.00705047	0.167551	0	0.0637167	0.0350762	0.18533	0	0.0147891	0	0	0.0004	0.232894	0	0	0.253125	0.04009	0	0	0.479969	0.883896
H376.IV.50.DFC	H376.IV.50	24 pcw	M	stage2	0.00683913	0.164742	0	0.0411601	0.0318922	0.22531	0	0.0478815	0	0	0.00721152	0.23063	0	0	0.210771	0.0335619	0	0	0.472098	0.891517
H376.IV.50.OFC	H376.IV.50	24 pcw	M	stage2	0.0240264	0.137174	0	0.0739939	0.0322944	0.213696	0	0.0562867	0	0	0.00182293	0.220536	0	0	0.21484	0.0253281	0	0	0.476326	0.888356
H376.IV.50.ITC	H376.IV.50	24 pcw	M	stage2	0	0.14374	0	0.00144837	0.0754923	0.221829	0	0.068172	0	0	0.00895094	0.250293	0	0	0.205382	0.0246931	0	0	0.446554	0.909572
H376.IV.50.HIP	H376.IV.50	24 pcw	M	stage2	0.006218	0.209944	0	0	0.181927	0.120175	0	0.0801949	0	0.0268698	0.00919032	0.109924	0	0	0.247515	0.00220491	0.00583691	0	0.398359	0.936547
H376.IV.50.VFC	H376.IV.50	24 pcw	M	stage2	0.00567212	0.162364	0	0.052318	0.0389034	0.205027	0	0.066144	0	0.0007	0.00833421	0.198609	0	0	0.23458	0.0273231	0	0	0.435296	0.914201
H376.IV.50.A1C	H376.IV.50	24 pcw	M	stage2	0	0.153905	0	0	0.10007	0.213224	0	0.0651084	0	0	0.00669625	0.224746	0	0	0.211225	0.025025	0	0	0.435546	0.916042
H376.IV.50.V1C	H376.IV.50	24 pcw	M	stage2	0.0222651	0.154863	0	0	0.0655462	0.18229	0	0.112421	0	0	0	0.277864	0	0	0.172097	0.0126539	0	0	0.45803	0.907164
H376.IV.50.STR	H376.IV.50	24 pcw	M	stage2	0.0235215	0.313585	0	0	0.0521902	0.130551	0	0.071018	0	0.0284255	0	0.151232	0	0	0.203521	0.0259551	0	0	0.443892	0.913915
H376.IV.50.M1C	H376.IV.50	24 pcw	M	stage2	0.0101982	0.204536	0	0	0.0530924	0.232446	0	0.0831173	0	0.00217509	0.00881055	0.137768	0	0	0.231779	0.0360774	0	0	0.410399	0.932017
H376.IV.50.IPC	H376.IV.50	24 pcw	M	stage2	0	0.153917	0	0.0511473	0.0861936	0.216797	0	0.0139782	0	0	0.00226902	0.207671	0	0	0.244466	0.0235606	0	0	0.456125	0.900236
H376.IV.50.S1C	H376.IV.50	24 pcw	M	stage2	0	0.151252	0	0.0186225	0.0522305	0.218574	0	0.0737033	0	0	0.00553987	0.20189	0	0	0.243105	0.035083	0	0	0.408979	0.930313
H376.IV.50.CBC	H376.IV.50	24 pcw	M	stage2	0.00685468	0.256416	0	0	0.129695	0.148141	0	0.0970382	0	0.012127	0.00236418	0.0819228	0	0	0.22125	0.0373908	0.00680113	0	0.378625	0.954244
H376.IV.50.MD	H376.IV.50	24 pcw	M	stage2	0.0193341	0.0848852	0	0	0.0891586	0.139486	0	0.131866	0	0.0119223	0.0219346	0.0658771	0	0.00359222	0.366583	0.0653599	0	0	0.31094	0.971917
H376.V.53.AMY	H376.V.53	37 pcw	M	stage3	0.00699443	0.115342	0	0	0.129836	0.0575039	0	0.228874	0	0.126871	0.120639	0.0572791	0	0.0232191	0.10584	0.0256787	0.00192196	0	0.342188	0.965301
H376.V.53.STC	H376.V.53	37 pcw	M	stage3	0	0.104861	0	0	0.0492127	0.198333	0	0.214243	0	0.0563777	0.0740688	0.0671135	0	0.00215843	0.207778	0.0258551	0	0	0.335543	0.968099
H376.V.53.MFC	H376.V.53	37 pcw	M	stage3	0	0.137602	0	0	0.124739	0.140688	0	0.18322	0	0.0962877	0.0725898	0.0516138	0	0.0053391	0.175964	0.0119565	0	0	0.339846	0.968009
H376.V.53.DFC	H376.V.53	37 pcw	M	stage3	0	0.112713	0	0	0.0674175	0.192634	0	0.191327	0	0.0654028	0.0713551	0.0653147	0	0.0009	0.206956	0.025931	0	0	0.33816	0.966023
H376.V.53.OFC	H376.V.53	37 pcw	M	stage3	0	0.171498	0	0	0.0894557	0.173026	0	0.170673	0	0.081994	0.0691389	0.0493942	0	0.00444358	0.173412	0.0169642	0	0	0.349064	0.965653
H376.V.53.ITC	H376.V.53	37 pcw	M	stage3	0	0.164489	0	0	0.0937007	0.157922	0	0.156173	0	0.0508904	0.0572907	0.0895012	0	0	0.215815	0.014219	0	0	0.284672	1.00015
H376.V.53.HIP	H376.V.53	37 pcw	M	stage3	0	0.219901	0	0	0.231875	0	0	0.121433	0	0.142557	0.110517	0.0459832	0	0.0381188	0.0781663	0.0114484	0	0	0.314608	0.987991
H376.V.53.VFC	H376.V.53	37 pcw	M	stage3	0	0.144244	0	0	0.101385	0.13314	0	0.199064	0	0.0937149	0.0920788	0.0491983	0	0.0046614	0.17108	0.0114342	0	0	0.340087	0.967891
H376.V.53.A1C	H376.V.53	37 pcw	M	stage3	0	0.123159	0	0	0.0915487	0.11954	0	0.178199	0	0.0934107	0.0828286	0.0573628	0	0.00744416	0.21691	0.0295972	0	0	0.383291	0.935835
H376.V.53.V1C	H376.V.53	37 pcw	M	stage3	0	0.093577	0	0	0.0796356	0.131014	0	0.209479	0	0.0846613	0.0970683	0.0592725	0	0.0100167	0.22861	0.00666528	0	0	0.378881	0.938266
H376.V.53.STR	H376.V.53	37 pcw	M	stage3	0	0.107399	0	0	0.110659	0	0	0.234939	0	0.240842	0.141713	0.0493022	0	0.00734224	0.0879059	0.0188591	0.00103915	0	0.458268	0.901802
H376.V.53.M1C	H376.V.53	37 pcw	M	stage3	0	0.127105	0	0	0.126091	0.125147	0	0.168275	0	0.129274	0.0968966	0.0556653	0	0.00301418	0.143808	0.0247239	0	0	0.380857	0.942032
H376.V.53.IPC	H376.V.53	37 pcw	M	stage3	0	0.123582	0	0.0361472	0.0789763	0.129044	0	0.175162	0	0.0776777	0.075916	0.0691001	0	0	0.208672	0.0257226	0	0	0.352513	0.955002
H376.V.53.S1C	H376.V.53	37 pcw	M	stage3	0	0.09168	0	0	0.101246	0.0786175	0	0.191264	0	0.124331	0.127506	0.0579383	0	0.0142023	0.18743	0.0242454	0.00153898	0	0.411083	0.918615
H376.V.53.CBC	H376.V.53	37 pcw	M	stage3	0	0.264767	0	0	0.110766	0.154872	0	0.0558909	0	0.0848723	0.0957588	0.0867172	0	0.00927151	0.125113	0.00691156	0.00505976	0	0.383116	0.946367
H376.V.53.MD	H376.V.53	37 pcw	M	stage3	0.0115642	0.0458269	0	0	0.183689	0.0212104	0	0.291183	0	0.0910007	0.207587	0.0369354	0	0.017493	0.0481229	0.0238984	0.0214886	0	0.332041	0.972389
H376.VI.50.AMY	H376.VI.50	4 mos	M	stage4	0	0.0553285	0	0	0.0566739	0.0753904	0	0.1471	0	0.114166	0.0541157	0.0459455	0	0	0.382371	0.0175635	0.0513463	0	0.318861	0.962695
H376.VI.50.STC	H376.VI.50	4 mos	M	stage4	0	0.0291038	0	0.0521543	0.00559636	0.153759	0	0.0530937	0	0.0480694	0.0437289	0.0296776	0	0	0.547347	0.0234826	0.0139878	0	0.455806	0.891066
H376.VI.50.MFC	H376.VI.50	4 mos	M	stage4	0	0.0513277	0	0.0731661	0.0327611	0.127817	0	0.0403742	0	0.0438509	0.0476388	0.0284208	0	0	0.529593	0.0219875	0.00306326	0	0.45552	0.891198
H376.VI.50.DFC	H376.VI.50	4 mos	M	stage4	0	0.0564934	0	0.0340826	0.0131359	0.227276	0	0.0442694	0	0.043701	0.0366962	0.0553188	0	0	0.441351	0.00871705	0.0389586	0	0.428762	0.905777
H376.VI.50.OFC	H376.VI.50	4 mos	M	stage4	0	0.0464792	0	0.0562818	0	0.199656	0	0.0494326	0	0.0657157	0.0364958	0.0510479	0	0	0.434006	0.0146182	0.0462667	0	0.423693	0.907841
H376.VI.50.ITC	H376.VI.50	4 mos	M	stage4	0	0.0159752	0	0.0817501	0	0.179019	0	0.0465028	0	0.0577928	0.0431364	0.0233271	0	0	0.50748	0.0375349	0.00748227	0	0.450329	0.893628
H376.VI.50.HIP	H376.VI.50	4 mos	M	stage4	0	0.0509103	0	0	0.0479393	0.11038	0	0.0859423	0	0.109045	0.0521846	0.0393792	0	0	0.45587	0.0170058	0.0313431	0	0.425872	0.906929
H376.VI.50.VFC	H376.VI.50	4 mos	M	stage4	0	0.058034	0	0.0561241	0	0.20247	0	0.0270208	0	0.036981	0.0298497	0.0583335	0	0	0.456237	0.00889085	0.0660598	0	0.429748	0.90507
H376.VI.50.A1C	H376.VI.50	4 mos	M	stage4	0	0.0566844	0	0.0731923	0	0.200533	0	0.0266517	0	0.0209641	0.0300641	0.0385272	0	0	0.485382	0.0118752	0.0561254	0	0.426204	0.907326
H376.VI.50.V1C	H376.VI.50	4 mos	M	stage4	0	0.0897736	0	0.0261158	0.0179385	0.118434	0	0.0230266	0	0.0496505	0.0302442	0.0308998	0	0	0.565927	0.0322295	0.0157603	0	0.405467	0.919923
H376.VI.50.STR	H376.VI.50	4 mos	M	stage4	0.00584821	0.0616568	0	0	0.0132683	0.230109	0	0.105967	0	0.0257279	0.0670966	0.0128131	0	0	0.395133	0.00143441	0.0809458	0	0.356004	0.945255
H376.VI.50.M1C	H376.VI.50	4 mos	M	stage4	0	0.0790856	0	0.0432002	0	0.178689	0	0.024964	0	0.0205536	0.0346395	0.0380961	0	0	0.507733	0.0093935	0.0636457	0	0.424227	0.908699
H376.VI.50.IPC	H376.VI.50	4 mos	M	stage4	0	0.0576941	0	0.0596828	0.00826165	0.156812	0	0.0334264	0	0.0402678	0.0273165	0.0372459	0	0	0.514612	0.0158802	0.0488014	0	0.42985	0.905194
H376.VI.50.S1C	H376.VI.50	4 mos	M	stage4	0	0.0601719	0	0.0451609	0.00342424	0.193844	0	0.0257753	0	0.016261	0.0296014	0.040003	0	0	0.520737	0.00685337	0.0581677	0	0.438544	0.901018
H376.VI.50.CBC	H376.VI.50	4 mos	M	stage4	0	0.106915	0	0	0.135933	0.164081	0	0.0452428	0	0.049272	0.112724	0.038137	0	0.00118031	0.306935	0	0.0395802	0	0.350778	0.947415
H376.VI.50.MD	H376.VI.50	4 mos	M	stage4	0	0.0877059	0	0.0161065	0.0167747	0.127925	0	0.0171856	0	0.0234744	0.0504981	0.0248449	0	0	0.577452	0.00506844	0.0529646	0	0.411485	0.916659
H376.VI.51.AMY	H376.VI.51	4 mos	M	stage4	0.0103888	0.0645879	0	0	0.141847	0	0	0.137114	0	0.307372	0.121856	0.0455293	0	0	0.116815	0.0241559	0.0303348	0	0.473586	0.896015
H376.VI.51.STC	H376.VI.51	4 mos	M	stage4	0.0198629	0	0	0	0.0819134	0.0613534	0	0.186939	0	0.260455	0.111319	0.0532878	0	0	0.180591	0.0111525	0.0331261	0	0.416487	0.92402
H376.VI.51.MFC	H376.VI.51	4 mos	M	stage4	0.0114119	0.0260047	0	0	0.0905419	0.0594886	0	0.164638	0	0.315676	0.0752052	0.0362751	0	0	0.171158	0.0147626	0.0348384	0	0.540609	0.846424
H376.VI.51.DFC	H376.VI.51	4 mos	M	stage4	0.00701283	0	0	0	0.0879072	0.0146823	0	0.222869	0	0.301616	0.112754	0.0547554	0	0	0.160625	0.0137644	0.0240131	0	0.483424	0.886286
H376.VI.51.OFC	H376.VI.51	4 mos	M	stage4	0.00258139	0.0297177	0	0	0.11834	0.0187172	0	0.122876	0	0.400451	0.0577473	0.0595197	0	0	0.135201	0.0457048	0.0091435	0	0.602019	0.808196
H376.VI.51.ITC	H376.VI.51	4 mos	M	stage4	0.00291881	0	0	0	0.0700842	0.0861329	0	0.201201	0	0.240661	0.108552	0.0559966	0	0	0.201364	0.0174716	0.0156181	0	0.449586	0.900586
H376.VI.51.HIP	H376.VI.51	4 mos	M	stage4	0	0.0298627	0	0	0.139904	0.0327845	0	0.131385	0	0.235539	0.0794475	0.0579297	0	0	0.190459	0.0186117	0.0840769	0	0.453282	0.897412
H376.VI.51.VFC	H376.VI.51	4 mos	M	stage4	0.00778942	0.0355091	0	0	0.0991615	0.0632457	0	0.130603	0	0.344715	0.0736574	0.0483263	0	0	0.157232	0.0185704	0.0211898	0	0.5261	0.8616
H376.VI.51.A1C	H376.VI.51	4 mos	M	stage4	0.0255257	0	0	0	0.0828759	0	0	0.158963	0	0.400321	0.123286	0.0498413	0	0	0.137037	0	0.0221501	0	0.607932	0.803974
H376.VI.51.V1C	H376.VI.51	4 mos	M	stage4	0.0112883	0.0494381	0	0	0.132182	0.0002	0	0.157595	0	0.343041	0.0802331	0.0304444	0	0	0.162488	0.00315562	0.0299503	0	0.538515	0.852268
H376.VI.51.STR	H376.VI.51	4 mos	M	stage4	0.0163063	0.0426131	0	0	0.119299	0	0	0.114223	0	0.319731	0.0734582	0.0646329	0	0	0.117309	0.0118085	0.120619	0	0.477546	0.895782
H376.VI.51.M1C	H376.VI.51	4 mos	M	stage4	0.00971287	0.046565	0	0	0.0953525	0.00784886	0	0.0855566	0	0.455776	0.0625212	0.0451121	0	0	0.126864	0.0327699	0.0319207	0	0.65177	0.772276
H376.VI.51.IPC	H376.VI.51	4 mos	M	stage4	0.0177388	0.0490966	0	0	0.114089	0.01036	0	0.126445	0	0.333907	0.0776997	0.0381678	0	0	0.186625	0.0138139	0.0320571	0	0.542993	0.846719
H376.VI.51.S1C	H376.VI.51	4 mos	M	stage4	0.00203908	0.056308	0	0	0.0999829	0.0137213	0	0.130066	0	0.355172	0.0925726	0.00454981	0	0	0.199277	0.0127767	0.0335339	0	0.548501	0.84631
H376.VI.51.CBC	H376.VI.51	4 mos	M	stage4	0.0418304	0.282483	0.00121295	0	0.116973	0	0	0	0	0.185328	0.031923	0.024096	0	0	0.216627	0.0337128	0.0658132	0	0.368012	0.948905
H376.VI.51.MD	H376.VI.51	4 mos	M	stage4	0.00738603	0.0373924	0	0	0.165803	0	0	0.161296	0	0.240479	0.0722426	0.0526438	0	0	0.137323	0.00144296	0.123991	0	0.405982	0.930727
H376.VI.52.AMY	H376.VI.52	4 mos	M	stage4	0.00263838	0.0156209	0	0	0.04137	0.10966	0	0.158786	0	0.231674	0.0375935	0.0532583	0	0	0.296576	0.0491516	0.00367251	0	0.476542	0.881997
H376.VI.52.STC	H376.VI.52	4 mos	M	stage4	0	0.0405953	0	0.00531014	0.0556271	0.135818	0	0.147485	0	0.146758	0.0471766	0.0411285	0	0	0.370874	0.00585188	0.00337518	0	0.431975	0.905323
H376.VI.52.MFC	H376.VI.52	4 mos	M	stage4	0	0.0259343	0	0	0.0686977	0.1296	0	0.146262	0	0.0995807	0.0294538	0.034418	0	0	0.45752	0.00405942	0.0044741	0	0.405349	0.919439
H376.VI.52.DFC	H376.VI.52	4 mos	M	stage4	0	0.0287244	0	0	0.0373695	0.14316	0	0.1428	0	0.0851449	0.0265794	0.046044	0	0	0.473944	0.0151253	0.0011089	0	0.383006	0.931657
H376.VI.52.OFC	H376.VI.52	4 mos	M	stage4	0	0.0143675	0	0.00166356	0.0562143	0.159414	0	0.185811	0	0.0876146	0.0386929	0.0388268	0	0	0.406147	0.0112487	0	0	0.390999	0.927302
H376.VI.52.ITC	H376.VI.52	4 mos	M	stage4	0	0.0234443	0	0	0.0399334	0.145618	0	0.154768	0	0.0768518	0.0455553	0.0484912	0	0	0.448131	0.014699	0.00250829	0	0.390615	0.926718
H376.VI.52.HIP	H376.VI.52	4 mos	M	stage4	0	0	0	0	0.0786404	0.0678292	0	0.177276	0	0.272149	0.0470147	0.068729	0	0	0.189631	0.0474462	0.0512845	0	0.491913	0.875182
H376.VI.52.VFC	H376.VI.52	4 mos	M	stage4	0	0.0175947	0	0	0.0532438	0.142565	0	0.176658	0	0.105233	0.0351386	0.0350959	0	0	0.402285	0.012857	0.0193288	0	0.402038	0.920419
H376.VI.52.A1C	H376.VI.52	4 mos	M	stage4	0	0.0255081	0	0	0.0620302	0.11	0	0.126448	0	0.174157	0.0447679	0.0421333	0	0	0.395034	0.0019819	0.01794	0	0.473812	0.881314
H376.VI.52.V1C	H376.VI.52	4 mos	M	stage4	0	0.0773646	0	0.0444431	0.0190078	0.0884868	0	0.0832474	0	0.0768718	0.0267292	0.0341079	0	0	0.531766	0.010775	0.00720059	0	0.433174	0.904284
H376.VI.52.STR	H376.VI.52	4 mos	M	stage4	0.00448842	0.0622558	0	0	0.0278472	0.0967746	0	0.132094	0	0.270493	0.0506991	0.0514295	0	0	0.210579	0.0611344	0.0322053	0	0.537933	0.844105
H376.VI.52.M1C	H376.VI.52	4 mos	M	stage4	0	0.0654669	0	0	0.0596745	0.121746	0	0.133081	0	0.117235	0.0413529	0.0363619	0	0	0.358411	0.016531	0.0501395	0	0.298572	0.974503
H376.VI.52.IPC	H376.VI.52	4 mos	M	stage4	0	0.0270518	0	0.00983355	0.0396527	0.141105	0	0.144325	0	0.0894436	0.0267465	0.0378316	0	0	0.455947	0.0176695	0.0103943	0	0.39689	0.923394
H376.VI.52.S1C	H376.VI.52	4 mos	M	stage4	0	0.0378271	0	0	0.0604772	0.149301	0	0.132141	0	0.0800608	0.0317444	0.0409272	0	0	0.448234	0.0113051	0.00798159	0	0.38023	0.932721
H376.VI.52.CBC	H376.VI.52	4 mos	M	stage4	0	0.173867	0	0	0.186197	0.115961	0	0.0133082	0	0.0360025	0.0506975	0.0311497	0	0	0.365292	0	0.0275258	0	0.275884	0.991184
H376.VI.52.MD	H376.VI.52	4 mos	M	stage4	0.0164771	0.0279094	0	0	0.0235829	0.166318	0	0.109488	0	0.0336965	0.0286102	0.0334274	0	0	0.51051	0	0.0499804	0	0.352319	0.947731
H376.VII.51.AMY	H376.VII.51	10 mos	M	stage4	0	0.069759	0	0	0.0674869	0.0790616	0	0.122117	0	0.11325	0.0605413	0.0203233	0	0	0.345449	0	0.122012	0	0.373372	0.936212
H376.VII.51.STC	H376.VII.51	10 mos	M	stage4	0	0.111378	0	0.0357215	0.0235936	0.145223	0	0.0854636	0	0.0973326	0.0663324	0.0140352	0	0	0.37523	0	0.0456904	0	0.365323	0.940056
H376.VII.51.MFC	H376.VII.51	10 mos	M	stage4	0	0.0833032	0	0.134743	0.0230443	0.0835526	0	0.0254286	0	0.116437	0.0455691	0.0189405	0	0	0.445903	0	0.0230786	0	0.4339	0.902717
H376.VII.51.DFC	H376.VII.51	10 mos	M	stage4	0	0.0745889	0	0.0817208	0.0124611	0.151452	0	0.0932051	0	0.0643733	0.0660981	0.0211576	0	0	0.417383	0	0.0175601	0	0.386328	0.92862
H376.VII.51.OFC	H376.VII.51	10 mos	M	stage4	0	0.0357844	0	0.086564	0.0422673	0.123254	0	0.122833	0	0.108094	0.0666879	0.0219711	0	0	0.351995	0	0.0405493	0	0.384785	0.928442
H376.VII.51.ITC	H376.VII.51	10 mos	M	stage4	0	0.0701805	0	0.0489463	0.0684163	0.144746	0	0.0599192	0	0.10841	0.0591203	0.0160809	0	0	0.407388	0	0.0167922	0	0.386146	0.928961
H376.VII.51.HIP	H376.VII.51	10 mos	M	stage4	0	0.0144219	0	0	0.0403508	0.199239	0	0.107802	0	0.112525	0.0606115	0.0102838	0	0	0.352238	0	0.102527	0	0.394978	0.923796
H376.VII.51.VFC	H376.VII.51	10 mos	M	stage4	0	0.0546601	0	0.0386745	0.0195302	0.204987	0	0.0879798	0	0.0550139	0.0461373	0.0605816	0	0	0.384372	0.00461068	0.0434528	0	0.36358	0.94063
H376.VII.51.A1C	H376.VII.51	10 mos	M	stage4	0	0.0416577	0	0.0362026	0.011396	0.21075	0	0.100767	0	0.0552291	0.0504943	0.0293279	0	0	0.420262	0.003326	0.0405872	0	0.357898	0.943401
H376.VII.51.V1C	H376.VII.51	10 mos	M	stage4	0	0.0675752	0	0.054122	0.0200228	0.198823	0	0.0923946	0	0.0694702	0.0478353	0.0208166	0	0	0.420639	0	0.00830116	0	0.32993	0.960478
H376.VII.51.STR	H376.VII.51	10 mos	M	stage4	0	0.0456596	0	0	0.0437836	0.152492	0	0.1398	0	0.106895	0.0612827	0.0717029	0	0	0.248493	0	0.129892	0	0.347476	0.951413
H376.VII.51.M1C	H376.VII.51	10 mos	M	stage4	0	0.019518	0	0.0531536	0.0152585	0.174536	0	0.124769	0	0.0507184	0.0564526	0.021293	0	0	0.434728	0.00589152	0.0436804	0	0.339444	0.951906
H376.VII.51.IPC	H376.VII.51	10 mos	M	stage4	0	0.0954554	0	0.0288367	0.0408974	0.17873	0	0.0920426	0	0.0430442	0.0911405	0.0217131	0	0	0.384436	0	0.0237043	0	0.347976	0.949629
H376.VII.51.S1C	H376.VII.51	10 mos	M	stage4	0	0.0461514	0	0.0883949	0.0127991	0.14306	0	0.0970076	0	0.0346023	0.081825	0.0148257	0	0	0.462027	0	0.0193069	0	0.41564	0.912398
H376.VII.51.CBC	H376.VII.51	10 mos	M	stage4	0	0.228145	0.0516511	0.0387142	0.0627103	0.0515136	0	0	0	0.0374816	0.0355579	0	0.0440255	0	0.42463	0	0.0255708	0	0.282759	0.986682
H376.VII.51.MD	H376.VII.51	10 mos	M	stage4	0.00282165	0.0403575	0	0	0.0497462	0.15496	0	0.0935795	0	0.0439237	0.0408762	0.018288	0	0	0.462489	0	0.0929578	0	0.343553	0.950855
H376.VIII.51.AMY	H376.VIII.51	1 yrs	F	stage4	0	0.0542013	0	0.0271733	0.0154477	0.0556925	0	0.0796112	0	0.106295	0.0299423	0.0411637	0	0	0.434445	0.057134	0.0988949	0	0.442001	0.897895
H376.VIII.51.STC	H376.VIII.51	1 yrs	F	stage4	0.0102297	0.0541519	0	0.0701476	0	0.0794697	0	0.0083167	0	0.0233302	0.031512	0.0343897	0	0	0.585317	0.0498462	0.0532895	0	0.424134	0.909244
H376.VIII.51.MFC	H376.VIII.51	1 yrs	F	stage4	0	0.050697	0	0.0306225	0.0009	0.0437259	0	0.0870351	0	0.0492754	0.041688	0.0358816	0	0	0.4786	0.0513156	0.130257	0	0.489117	0.871713
H376.VIII.51.DFC	H376.VIII.51	1 yrs	F	stage4	0	0.0562268	0	0.0723396	0.0240926	0.0563236	0	0.0286766	0	0.0361331	0.0405022	0.0344792	0	0	0.599306	0.0296837	0.0222364	0	0.433286	0.904553
H376.VIII.51.OFC	H376.VIII.51	1 yrs	F	stage4	0.00495552	0	0	0	0.0346007	0.0653643	0	0.134251	0	0.0555475	0.0513162	0.0339367	0	0	0.474846	0.040799	0.104383	0	0.458249	0.888747
H376.VIII.51.ITC	H376.VIII.51	1 yrs	F	stage4	0.00649293	0.0241709	0	0.0666088	0	0.0768991	0	0.0335822	0	0.0288892	0.0378389	0.0363792	0	0	0.601807	0.0489135	0.0384187	0	0.454319	0.892476
H376.VIII.51.HIP	H376.VIII.51	1 yrs	F	stage4	0.0245943	0.0282728	0	0	0	0.125823	0	0.0244679	0	0.0788904	0.0503922	0.0594285	0	0	0.417213	0.0451575	0.145761	0	0.55345	0.833415
H376.VIII.51.VFC	H376.VIII.51	1 yrs	F	stage4	0.00709152	0.0413291	0	0.0827737	0	0.0783658	0	0	0	0.0158323	0.0396354	0.0433934	0	0	0.571146	0.0484143	0.0720189	0	0.469852	0.883271
H376.VIII.51.A1C	H376.VIII.51	1 yrs	F	stage4	0.0106718	0.0284771	0	0.0919895	0	0.0833037	0	0.0211259	0	0.0108069	0.0372076	0.0423361	0	0	0.59874	0.0348641	0.040477	0	0.456094	0.891656
H376.VIII.51.V1C	H376.VIII.51	1 yrs	F	stage4	0	0.0517071	0	0.137196	0	0.0724499	0	0	0	0.0189035	0.0397041	0.0229576	0	0	0.580772	0.0328809	0.0434283	0	0.453423	0.89259
H376.VIII.51.STR	H376.VIII.51	1 yrs	F	stage4	0.0090074	0.0541762	0	0.015301	0	0.0797827	0	0.06639	0	0.126428	0.0443364	0.00649856	0	0	0.482103	0.0340658	0.0819108	0	0.492229	0.869976
H376.VIII.51.M1C	H376.VIII.51	1 yrs	F	stage4	0	0.0599302	0	0.0824239	0	0.0681841	0	0.0213673	0	0.013006	0.0345704	0.0751613	0	0	0.544066	0.0451583	0.0561325	0	0.387227	0.929086
H376.VIII.51.IPC	H376.VIII.51	1 yrs	F	stage4	0.00781908	0.0251819	0	0.119693	0	0.059451	0	0.0239296	0	0.0134003	0.0376893	0.0280693	0	0	0.611731	0.0387674	0.0342675	0	0.448894	0.89584
H376.VIII.51.S1C	H376.VIII.51	1 yrs	F	stage4	0.005253	0.0681472	0	0.111922	0	0.0570633	0	0	0	0.017759	0.0407393	0.0408587	0	0	0.54467	0.0495286	0.0640589	0	0.434969	0.902306
H376.VIII.51.CBC	H376.VIII.51	1 yrs	F	stage4	0.0220814	0.0930862	0	0	0.0675382	0.109923	0	0	0	0.0282468	0.0751928	0.0314272	0	0	0.515271	0	0.057233	0	0.31859	0.964205
H376.VIII.51.MD	H376.VIII.51	1 yrs	F	stage4	0.0325442	0.0310578	0	0	0.0357908	0.064028	0	0.0263437	0	0.0854688	0.042193	0.0602509	0	0	0.549171	0.0225122	0.0506399	0	0.474452	0.880532
H376.VIII.53.AMY	H376.VIII.53	2 yrs	F	stage4	0.0138119	0.0003	0.00781092	0	0.148015	0	0	0.182828	0	0.259656	0.151439	0.0180353	0	0	0.0143028	0	0.20376	0	0.349883	0.989662
H376.VIII.53.STC	H376.VIII.53	2 yrs	F	stage4	0	0	0	0	0.151507	0	0.0009	0.1737	0	0.33866	0.155646	0.0167925	0	0	0.0592628	0	0.103549	0	0.425701	0.942617
H376.VIII.53.MFC	H376.VIII.53	2 yrs	F	stage4	0	0	0.00991496	0	0.141458	0	0	0.185969	0	0.285821	0.143743	0.0288803	0	0	0.0720427	0	0.132171	0	0.324974	0.996855
H376.VIII.53.DFC	H376.VIII.53	2 yrs	F	stage4	0	0	0	0	0.143565	0	0	0.196554	0	0.288796	0.146276	0.0183419	0	0	0.0758689	0	0.130599	0	0.352079	0.980515
H376.VIII.53.OFC	H376.VIII.53	2 yrs	F	stage4	0.0126019	0	0	0	0.116096	0.0089803	0.0174985	0.22309	0	0.235256	0.139403	0.0285675	0	0	0.0873401	0	0.131167	0	0.32321	0.985558
H376.VIII.53.ITC	H376.VIII.53	2 yrs	F	stage4	0.0005	0	0	0	0.172611	0	0.00602999	0.201695	0	0.276705	0.136839	0.0325046	0	0	0.0850452	0	0.0880803	0	0.322691	0.991831
H376.VIII.53.HIP	H376.VIII.53	2 yrs	F	stage4	0.0153549	0	0.0129458	0	0.125692	0.0188252	0	0.22701	0	0.140993	0.148801	0.0268445	0	0	0.0577002	0	0.225833	0	0.341204	0.97677
H376.VIII.53.VFC	H376.VIII.53	2 yrs	F	stage4	0	0	0.00424348	0	0.124912	0	0	0.207469	0	0.252718	0.159762	0.0205333	0	0	0.0739733	0	0.156389	0	0.315418	0.998429
H376.VIII.53.A1C	H376.VIII.53	2 yrs	F	stage4	0	0	0.0281699	0	0.154581	0	0.0129034	0.16299	0	0.295822	0.158815	0.0298747	0	0	0.0424556	0	0.114388	0	0.393587	0.954944
H376.VIII.53.V1C	H376.VIII.53	2 yrs	F	stage4	0.0075701	0	0	0	0.137272	0	0.0175474	0.155642	0	0.250665	0.176382	0.0166093	0	0	0.0785973	0	0.159715	0	0.397109	0.946486
H376.VIII.53.STR	H376.VIII.53	2 yrs	F	stage4	0.038657	0	0	0	0.131154	0	0	0.21822	0	0.21765	0.130277	0.0408604	0	0	0	0	0.223181	0	0.354654	0.981445
H376.VIII.53.M1C	H376.VIII.53	2 yrs	F	stage4	0	0	0.0510824	0	0.130905	0	0.0143784	0.148546	0	0.300123	0.16374	0.00640145	0	0	0.0567984	0	0.128026	0	0.382469	0.965239
H376.VIII.53.IPC	H376.VIII.53	2 yrs	F	stage4	0.00119664	0	0	0	0.144914	0	0.00303764	0.143918	0	0.348098	0.140243	0.0216467	0	0	0.0637814	0	0.133163	0	0.399392	0.965977
H376.VIII.53.S1C	H376.VIII.53	2 yrs	F	stage4	0	0.0230626	0.0161015	0	0.142661	0	0	0.162276	0	0.254439	0.130589	0.0246101	0	0	0.0588363	0	0.187424	0	0.35384	0.978654
H376.VIII.53.CBC	H376.VIII.53	2 yrs	F	stage4	0.0198354	0	0	0	0.111039	0.0777845	0	0.185114	0	0.0979609	0.133743	0.0584299	0	0	0.201453	0	0.11464	0	0.239568	1.005
H376.VIII.53.MD	H376.VIII.53	2 yrs	F	stage4	0	0	0	0	0.128937	0.0154079	0.00594217	0.194032	0	0.255249	0.192561	0.0240633	0	0	0.0276646	0	0.156142	0	0.257499	1.04004
H376.VIII.52.AMY	H376.VIII.52	3 yrs	F	stage4	0.0007	0.0144718	0	0	0.148538	0.0126668	0	0.156622	0	0.148074	0.161839	0.0492797	0	0	0.09655	0	0.211286	0	0.325528	0.980232
H376.VIII.52.STC	H376.VIII.52	3 yrs	F	stage4	0.0011738	0.00843937	0	0	0.0777489	0.062506	0	0.189899	0	0.243947	0.0804333	0.0441212	0	0	0.246448	0	0.0452833	0	0.373655	0.946304
H376.VIII.52.MFC	H376.VIII.52	3 yrs	F	stage4	0	0	0	0	0.0923649	0.0984157	0	0.1342	0	0.271264	0.111462	0.056831	0	0	0.184356	0	0.0511056	0	0.427597	0.918116
H376.VIII.52.DFC	H376.VIII.52	3 yrs	F	stage4	0.00322849	0.0164068	0	0	0.0356126	0.065667	0	0.114086	0	0.321818	0.128707	0.0591929	0	0	0.200619	0	0.0546628	0	0.470429	0.898766
H376.VIII.52.OFC	H376.VIII.52	3 yrs	F	stage4	0	0.00385103	0	0	0.108795	0.0787349	0	0.110904	0	0.260856	0.12699	0.0490856	0	0	0.193083	0	0.0677005	0	0.415794	0.924269
H376.VIII.52.ITC	H376.VIII.52	3 yrs	F	stage4	0.0122898	0.00504549	0	0	0.0710586	0.0734139	0	0.201701	0	0.304547	0.071233	0.0507913	0	0.0002	0.174786	0	0.0349378	0	0.439896	0.916333
H376.VIII.52.HIP	H376.VIII.52	3 yrs	F	stage4	0.0368962	0.130371	0	0.0341428	0	0.0322458	0	0.0423804	0	0.163461	0.117178	0.0458625	0	0	0.12844	0	0.269022	0	0.42189	0.932157
H376.VIII.52.VFC	H376.VIII.52	3 yrs	F	stage4	0	0.0115733	0	0	0.0641816	0.0947116	0	0.176106	0	0.234246	0.0939917	0.0483762	0	0.0110713	0.243757	0.00849029	0.0134951	0	0.400704	0.929258
H376.VIII.52.A1C	H376.VIII.52	3 yrs	F	stage4	0	0	0	0	0.0798061	0.0906639	0	0.210082	0	0.215195	0.0875642	0.0388096	0	0.00188173	0.256203	0	0.0197933	0	0.363452	0.949108
H376.VIII.52.V1C	H376.VIII.52	3 yrs	F	stage4	0.0004	0.0338484	0	0	0.0694481	0.0758337	0	0.142549	0	0.270735	0.0829659	0.0403228	0	0	0.215544	0	0.0683412	0	0.433183	0.914356
H376.VIII.52.STR	H376.VIII.52	3 yrs	F	stage4	0.0222479	0.0532388	0	0	0.0842107	0.00887291	0	0.130782	0	0.120623	0.144168	0.0206698	0	0	0.0930071	0	0.322179	0	0.465041	0.911923
H376.VIII.52.M1C	H376.VIII.52	3 yrs	F	stage4	0	0.00347208	0	0	0.0778281	0.100186	0	0.165809	0	0.309578	0.054004	0.0380267	0	0	0.21832	0	0.0327765	0	0.47932	0.889095
H376.VIII.52.IPC	H376.VIII.52	3 yrs	F	stage4	0	0.00809237	0	0	0.081074	0.119024	0	0.150234	0	0.194911	0.0794563	0.037263	0	0	0.245913	0	0.0840321	0	0.416286	0.915909
H376.VIII.52.S1C	H376.VIII.52	3 yrs	F	stage4	0	0	0	0	0.0784189	0.106054	0	0.127673	0	0.280712	0.110054	0.0379272	0	0	0.19422	0	0.0649398	0	0.445098	0.908365
H376.VIII.52.CBC	H376.VIII.52	3 yrs	F	stage4	0.00510992	0.177883	0	0	0.12223	0.0510788	0	0	0	0.0591298	0.0572266	0.0184815	0	0	0.452858	0	0.056002	0	0.190206	1.02845
H376.VIII.52.MD	H376.VIII.52	3 yrs	F	stage4	0.0119021	0.0185613	0	0	0.042037	0.0913012	0	0.15689	0	0.122086	0.110274	0.0580386	0	0	0.103087	0	0.285823	0	0.333696	0.99
H376.VIII.54.AMY	H376.VIII.54	3 yrs	M	stage4	0	0.0136687	0	0	0.0941165	0.0108291	0	0.132399	0	0.335124	0.0911608	0.029378	0	0	0.0988001	0	0.194524	0	0.531112	0.865827
H376.VIII.54.STC	H376.VIII.54	3 yrs	M	stage4	0	0.0159778	0	0	0.107437	0.00704931	0	0.0961561	0	0.421423	0.0904012	0.0177194	0	0	0.142317	0	0.10152	0	0.607084	0.810511
H376.VIII.54.MFC	H376.VIII.54	3 yrs	M	stage4	0	0.0159936	0	0	0.090008	0.0042658	0	0.109366	0	0.480774	0.100354	0.0304713	0	0	0.0995487	0	0.0692181	0	0.630296	0.803562
H376.VIII.54.DFC	H376.VIII.54	3 yrs	M	stage4	0	0.0413702	0	0	0.0897132	0.0335844	0	0.0627602	0	0.352332	0.0674531	0.0366827	0	0	0.137917	0	0.178187	0	0.559267	0.843141
H376.VIII.54.OFC	H376.VIII.54	3 yrs	M	stage4	0	0.015338	0	0	0.0479301	0.0463779	0	0.102401	0	0.386945	0.0830356	0.0376632	0	0	0.175249	0	0.10506	0	0.549051	0.853075
H376.VIII.54.ITC	H376.VIII.54	3 yrs	M	stage4	0	0.0281572	0	0	0.120509	0	0	0.0718853	0	0.482521	0.0746223	0.0163181	0	0	0.134326	0.0148428	0.0567846	0	0.63365	0.799543
H376.VIII.54.HIP	H376.VIII.54	3 yrs	M	stage4	0	0.032295	0	0	0.141033	0.0168561	0	0.090707	0	0.147155	0.0706703	0.0167076	0	0	0.0798709	0	0.404705	0	0.643102	0.779689
H376.VIII.54.VFC	H376.VIII.54	3 yrs	M	stage4	0	0.0194992	0	0	0.120318	0	0.00410034	0.0979348	0	0.253903	0.0690767	0.0352173	0	0	0.16222	0	0.237731	0	0.419433	0.938096
H376.VIII.54.A1C	H376.VIII.54	3 yrs	M	stage4	0	0.0128998	0	0	0.112319	0.0191045	0	0.0976068	0	0.324856	0.0975698	0.0206741	0	0	0.152361	0	0.162608	0	0.527748	0.862632
H376.VIII.54.V1C	H376.VIII.54	3 yrs	M	stage4	0	0.0170385	0	0	0.115918	0	0	0.0756804	0	0.360436	0.120842	0.0225393	0	0	0.123846	0	0.1637	0	0.542666	0.859575
H376.VIII.54.STR	H376.VIII.54	3 yrs	M	stage4	0.00526933	0.00208779	0	0	0.106042	0	0	0.146622	0	0.27591	0.0869404	0.0219989	0	0	0.13732	0	0.217809	0	0.450211	0.918013
H376.VIII.54.M1C	H376.VIII.54	3 yrs	M	stage4	0	0.0152383	0	0	0.112159	0.00477277	0.00306137	0.0977717	0	0.42107	0.107293	0.0197164	0	0	0.102809	0	0.116108	0	0.553656	0.861461
H376.VIII.54.IPC	H376.VIII.54	3 yrs	M	stage4	0.00650945	0.0101819	0	0	0.0779596	0.0411119	0	0.0897561	0	0.479251	0.116366	0.00104838	0	0	0.092508	0	0.085307	0	0.600306	0.836042
H376.VIII.54.S1C	H376.VIII.54	3 yrs	M	stage4	0	0.0138649	0	0	0.11904	0	0.00217146	0.0949603	0	0.403873	0.105455	0.0257273	0	0	0.114269	0	0.120639	0	0.534687	0.872823
H376.VIII.54.CBC	H376.VIII.54	3 yrs	M	stage4	0.00348299	0.18534	0	0	0.0832632	0.0265308	0	0	0	0.0281622	0.048004	0.0105731	0	0	0.558951	0	0.0556926	0	0.221849	1.01732
H376.VIII.54.MD	H376.VIII.54	3 yrs	M	stage4	0.00386095	0	0	0	0.0986627	0	0	0.167049	0	0.298048	0.106362	0.0210499	0	0	0.0682079	0	0.236759	0	0.430605	0.944015
H376.VIII.50.AMY	H376.VIII.50	4 yrs	M	stage4	0	0	0	0	0.0612446	0.224345	0	0.16105	0	0.0708594	0.0707785	0.0274394	0	0	0.281335	0	0.102948	0	0.27181	0.98867
H376.VIII.50.STC	H376.VIII.50	4 yrs	M	stage4	0	0	0	0.0213842	0.0512725	0.202795	0.0322639	0.169184	0	0.065182	0.0798071	0.0274953	0	0	0.272453	0	0.0781626	0	0.289951	0.979987
H376.VIII.50.MFC	H376.VIII.50	4 yrs	M	stage4	0	0	0	0	0.0218298	0.205705	0	0.103135	0	0.115759	0.0682673	0.0369476	0	0	0.380446	0.0100146	0.057895	0	0.385836	0.927763
H376.VIII.50.DFC	H376.VIII.50	4 yrs	M	stage4	0	0	0	0	0.100081	0.266827	0	0.217003	0	0.049475	0.0646806	0.00823189	0	0	0.222488	0	0.0712145	0	0.223552	1.02434
H376.VIII.50.OFC	H376.VIII.50	4 yrs	M	stage4	0	0.0419819	0	0.0287624	0.00449346	0.139879	0	0.0151096	0	0.139324	0.0621666	0.0471164	0	0	0.400872	0.0198802	0.100414	0	0.444866	0.897166
H376.VIII.50.ITC	H376.VIII.50	4 yrs	M	stage4	0	0	0	0.0170824	0.0252652	0.245466	0.014519	0.152535	0	0.0894741	0.080457	0.0321944	0	0	0.307863	0.00799424	0.0271491	0	0.311372	0.96862
H376.VIII.50.HIP	H376.VIII.50	4 yrs	M	stage4	0	0	0	0	0.147905	0.178177	0.047532	0.14023	0	0.0454277	0.100392	0.0314557	0	0	0.30888	0	0	0	0.244493	1.00634
H376.VIII.50.VFC	H376.VIII.50	4 yrs	M	stage4	0	0	0	0	0.0802575	0.180682	0	0.104491	0	0.0772076	0.0759329	0.0170087	0	0	0.373042	0	0.0913784	0	0.317973	0.961912
H376.VIII.50.A1C	H376.VIII.50	4 yrs	M	stage4	0	0	0	0	0.164608	0.2035	0.0168313	0.0868391	0	0.0491149	0.103019	0.0378471	0	0	0.322753	0.0154887	0	0	0.272209	0.987791
H376.VIII.50.V1C	H376.VIII.50	4 yrs	M	stage4	0	0.00579338	0	0	0.0817274	0.160123	0	0.13768	0	0.0780393	0.0811106	0.0239116	0	0	0.375222	0	0.056392	0	0.3376	0.951969
H376.VIII.50.STR	H376.VIII.50	4 yrs	M	stage4	0	0	0	0	0.0207508	0.214154	0	0.135563	0	0.0759235	0.0840232	0.0357229	0	0	0.262575	0	0.171288	0	0.416192	0.914616
H376.VIII.50.M1C	H376.VIII.50	4 yrs	M	stage4	0	0	0	0	0.138466	0.237577	0.0221643	0.121886	0	0.0325104	0.10659	0.0258226	0	0	0.314983	0	0	0	0.253821	1.00176
H376.VIII.50.IPC	H376.VIII.50	4 yrs	M	stage4	0	0	0	0.0235823	0.0654306	0.148809	0	0.139234	0	0.102335	0.0663568	0.0298209	0	0	0.362505	0	0.0619264	0	0.366685	0.937343
H376.VIII.50.S1C	H376.VIII.50	4 yrs	M	stage4	0	0	0	0	0.149311	0.216071	0.0163521	0.0882508	0	0.0488262	0.0989655	0.0357664	0	0	0.329084	0.0117958	0.0055769	0	0.28056	0.983522
H376.VIII.50.CBC	H376.VIII.50	4 yrs	M	stage4	0	0.00440981	0	0	0.154549	0.172782	0	0.181281	0	0.0389475	0.0711546	0.0231708	0	0	0.303146	0	0.05056	0	0.220708	1.01597
H376.VIII.50.MD	H376.VIII.50	4 yrs	M	stage4	0	0	0	0	0.0404877	0.155218	0	0.118185	0	0.0721138	0.0669314	0.0259685	0	0	0.41054	0	0.110556	0	0.333452	0.954839
H376.IX.51.AMY	H376.IX.51	8 yrs	M	stage5	0.0127527	0.00301444	0	0	0	0.13778	0	0.122511	0	0.150038	0.0763908	0.0258388	0	0	0.29091	0	0.180764	0	0.433041	0.90756
H376.IX.51.STC	H376.IX.51	8 yrs	M	stage5	0	0	0	0	0.0391213	0.194718	0	0.129403	0	0.13894	0.0835887	0.0219458	0	0.0148594	0.331534	0	0.0458903	0	0.377032	0.933261
H376.IX.51.MFC	H376.IX.51	8 yrs	M	stage5	0	0	0	0.0015258	0.0344454	0.164196	0	0.168527	0	0.166885	0.0742636	0.0288164	0	0.0110419	0.284859	0	0.065439	0	0.321718	0.965119
H376.IX.51.DFC	H376.IX.51	8 yrs	M	stage5	0	0	0	0.0295007	0	0.087888	0	0.152924	0	0.207538	0.0688808	0.0325843	0	0.0073567	0.3123	0.00640671	0.0946209	0	0.381243	0.936512
H376.IX.51.OFC	H376.IX.51	8 yrs	M	stage5	0	0.0176488	0	0.0365132	0	0.144083	0	0.0842164	0	0.192114	0.0786057	0.0187774	0	0	0.342374	0.00314912	0.0825184	0	0.364502	0.944421
H376.IX.51.ITC	H376.IX.51	8 yrs	M	stage5	0	0	0	0	0.0307799	0.152911	0	0.131797	0	0.198405	0.0737576	0.0246989	0	0.0155446	0.292147	0	0.0799582	0	0.366489	0.943728
H376.IX.51.HIP	H376.IX.51	8 yrs	M	stage5	0	0.0128169	0	0	0.0143562	0.103032	0	0.0782871	0	0.125332	0.0649478	0.029061	0	0	0.385329	0.0131116	0.173726	0	0.53255	0.84589
H376.IX.51.VFC	H376.IX.51	8 yrs	M	stage5	0	0	0	0.00748957	0.00477151	0.148526	0	0.178514	0	0.18588	0.0765968	0.0270068	0	0.0187153	0.300415	0	0.0520847	0	0.363019	0.944186
H376.IX.51.A1C	H376.IX.51	8 yrs	M	stage5	0	0	0	0.00891035	0	0.178901	0	0.100302	0	0.137008	0.0832591	0.0236605	0	0.0112523	0.355577	0	0.10113	0	0.398666	0.92194
H376.IX.51.V1C	H376.IX.51	8 yrs	M	stage5	0	0.0293836	0.0377334	0.0522598	0	0.0974801	0	0.0884331	0	0.218077	0.0729011	0.00231804	0	0.00241016	0.338009	0	0.0609947	0	0.437137	0.90474
H376.IX.51.STR	H376.IX.51	8 yrs	M	stage5	0	0	0	0	0.0115608	0.137695	0	0.163169	0	0.138889	0.0800301	0.0363332	0	0.00485759	0.284175	0	0.14329	0	0.382107	0.933176
H376.IX.51.M1C	H376.IX.51	8 yrs	M	stage5	0	0	0	0	0.0410901	0.200162	0	0.130795	0	0.0786143	0.0909689	0.0269243	0	0.0109976	0.312259	0	0.108189	0	0.360447	0.940719
H376.IX.51.IPC	H376.IX.51	8 yrs	M	stage5	0	0	0	0	0.0470796	0.198422	0	0.132729	0	0.142473	0.104765	0.0235262	0	0.016749	0.293444	0	0.0408125	0	0.359401	0.943063
H376.IX.51.S1C	H376.IX.51	8 yrs	M	stage5	0	0	0	0	0.0415596	0.207756	0	0.119065	0	0.102631	0.0833829	0.0193191	0	0.0144092	0.312525	0	0.0993523	0	0.321592	0.960961
H376.IX.51.CBC	H376.IX.51	8 yrs	M	stage5	0	0.0734814	0	0	0.0702289	0.230341	0	0.11122	0	0.0527901	0.10218	0	0.0569252	0	0.25565	0.00669598	0.0404889	0	0.225694	1.0149
H376.IX.51.MD	H376.IX.51	8 yrs	M	stage5	0.00422166	0.0372169	0	0.0203023	0.00138187	0.108331	0	0.0399551	0	0.0840028	0.0555652	0.0457741	0	0.0103713	0.446863	0.0172092	0.128806	0	0.469153	0.883138
H376.IX.52.AMY	H376.IX.52	8 yrs	M	stage5	0	0	0	0.022259	0	0.0977262	0	0.132185	0	0.108157	0.0246312	0.0343747	0	0	0.374375	0.0138398	0.192452	0	0.29997	0.982109
H376.IX.52.STC	H376.IX.52	8 yrs	M	stage5	0	0.0333297	0	0.0791894	0	0.116157	0	0.0428741	0	0.0530191	0.0304717	0.0209177	0	0	0.569868	0.00688991	0.0472835	0	0.297575	0.977008
H376.IX.52.MFC	H376.IX.52	8 yrs	M	stage5	0	0	0	0.038562	0.0852899	0.104245	0	0.116489	0	0.0480305	0.0494073	0.014724	0	0.00198476	0.509016	0	0.0322521	0	0.380436	0.931062
H376.IX.52.DFC	H376.IX.52	8 yrs	M	stage5	0	0.0117592	0	0.103268	0.0299855	0.0423474	0	0.110964	0	0.0463987	0.0413712	0.00705051	0	0	0.536634	0	0.0702216	0	0.269863	0.987873
H376.IX.52.OFC	H376.IX.52	8 yrs	M	stage5	0	0.010582	0	0.0749064	0	0.11896	0	0.0839983	0	0.0687056	0.0459346	0.00995795	0	0	0.486998	0.00903972	0.0909169	0	0.391953	0.924627
H376.IX.52.ITC	H376.IX.52	8 yrs	M	stage5	0	0	0	0.0455923	0.0424407	0.0520436	0	0.052623	0	0.102946	0.0461152	0.0258398	0	0	0.521109	0.0210715	0.0902186	0	0.346507	0.951094
H376.IX.52.HIP	H376.IX.52	8 yrs	M	stage5	0	0.0281243	0	0	0.0322826	0.13465	0	0.027081	0	0.108945	0.0309743	0.0277552	0	0	0.447119	0	0.163068	0	0.53342	0.845298
H376.IX.52.VFC	H376.IX.52	8 yrs	M	stage5	0	0.0210115	0	0.04916	0.0124193	0.0959984	0	0.0625532	0	0.0315767	0.0359005	0.0119166	0	0	0.543687	0.0131828	0.122594	0	0.364088	0.942375
H376.IX.52.A1C	H376.IX.52	8 yrs	M	stage5	0	0.0304615	0	0.019019	0.0299836	0.0891735	0	0.069625	0	0.106266	0.013704	0.030138	0	0	0.364459	0.0249311	0.222239	0	0.394948	0.933027
H376.IX.52.V1C	H376.IX.52	8 yrs	M	stage5	0	0.00348867	0	0.0375392	0.00835538	0.119569	0	0.0633031	0	0.0348539	0.0286338	0.00348292	0	0	0.613978	0.00106672	0.0857289	0	0.39159	0.92878
H376.IX.52.STR	H376.IX.52	8 yrs	M	stage5	0.0154346	0	0	0	0.00216877	0.0165892	0	0.193522	0	0.141774	0.0662373	0	0	0	0.33548	0	0.228795	0	0.581571	0.813307
H376.IX.52.M1C	H376.IX.52	8 yrs	M	stage5	0	0.0369078	0	0.0201143	0	0.136465	0	0.0582216	0	0.0328917	0.0445813	0.00729548	0	0	0.534899	0.00327059	0.125354	0	0.373007	0.937817
H376.IX.52.IPC	H376.IX.52	8 yrs	M	stage5	0	0	0	0.00147082	0.028679	0.119372	0	0.0846085	0	0.0809023	0.023541	0.0157535	0	0	0.392638	0.0005	0.252569	0	0.441996	0.907725
H376.IX.52.S1C	H376.IX.52	8 yrs	M	stage5	0	0.0173954	0	0.0798346	0	0.112947	0	0.086322	0	0.0411777	0.0377463	0	0	0	0.489489	0.00946845	0.125619	0	0.369035	0.938043
H376.IX.52.CBC	H376.IX.52	8 yrs	M	stage5	0	0.104513	0	0	0.0565706	0.0610937	0	0.0471504	0	0.0360856	0.0293489	0.0303305	0	0	0.546673	0.00544492	0.0827893	0	0.193917	1.02986
H376.IX.52.MD	H376.IX.52	8 yrs	M	stage5	0	0.0604005	0	0	0.0841257	0.107886	0	0.0485238	0	0.22545	0.0737794	0.0914772	0	0	0	0	0.308358	0	0.443079	0.938579
H376.IX.50.AMY	H376.IX.50	11 yrs	F	stage5	0	0.011941	0	0	0	0.135864	0	0.104167	0	0.119483	0.0265139	0.0273082	0	0	0.460427	0.00163359	0.112662	0	0.503909	0.863174
H376.IX.50.STC	H376.IX.50	11 yrs	F	stage5	0	0.0114763	0	0	0.0548805	0.135082	0	0.117415	0	0.0732428	0.0785754	0.0296037	0	0	0.434497	0	0.065227	0	0.423726	0.907118
H376.IX.50.MFC	H376.IX.50	11 yrs	F	stage5	0	0.0340455	0	0.112712	0	0.062248	0	0.0714958	0	0.0662743	0.0333927	0.0219504	0	0	0.455143	0.00728285	0.135455	0	0.516738	0.8557
H376.IX.50.DFC	H376.IX.50	11 yrs	F	stage5	0	0.0422382	0	0.0772836	0	0.112855	0	0.0890384	0	0.0543568	0.038913	0.00951124	0	0	0.508711	0.00594164	0.0611508	0	0.428521	0.905367
H376.IX.50.OFC	H376.IX.50	11 yrs	F	stage5	0	0.032519	0	0.0139108	0	0.101097	0	0.0667698	0	0.0541506	0.0249541	0.0363414	0	0	0.399865	0	0.270392	0	0.642125	0.767332
H376.IX.50.ITC	H376.IX.50	11 yrs	F	stage5	0	0	0	0	0.0466894	0.134791	0	0.0892228	0	0.0761247	0.0577334	0.0317395	0	0	0.493308	0.0004	0.0699548	0	0.476318	0.878852
H376.IX.50.HIP	H376.IX.50	11 yrs	F	stage5	0	0.00940322	0	0	0.0909572	0.166333	0.00620488	0.0558026	0	0.0576734	0.0482292	0.0355616	0	0	0.365878	0	0.163957	0	0.539338	0.842014
H376.IX.50.VFC	H376.IX.50	11 yrs	F	stage5	0	0.0254045	0	0.0524571	0	0.132858	0	0.104124	0	0.0711968	0.044401	0.0130346	0	0	0.464368	0.00541884	0.0867364	0	0.447519	0.894687
H376.IX.50.A1C	H376.IX.50	11 yrs	F	stage5	0	0.0141824	0	0.0785962	0	0.0663175	0	0.0316532	0	0.0373434	0.0400382	0.0179652	0	0	0.590286	0.0123358	0.111282	0	0.532059	0.846347
H376.IX.50.V1C	H376.IX.50	11 yrs	F	stage5	0	0.0125828	0	0.00847676	0.00540773	0.0943706	0	0.111779	0	0.0298457	0.040067	0.0192836	0	0	0.44386	0	0.234328	0	0.573603	0.818602
H376.IX.50.STR	H376.IX.50	11 yrs	F	stage5	0	0.014829	0	0	0	0.116887	0	0.0729106	0	0.149566	0.0493694	0.0562723	0	0	0.326603	0.0195473	0.194015	0	0.603131	0.798835
H376.IX.50.M1C	H376.IX.50	11 yrs	F	stage5	0	0.0642682	0	0.0135769	0	0.108806	0	0.0852603	0	0.0274025	0.0401588	0.027037	0	0	0.425393	0.00145879	0.206638	0	0.591907	0.806722
H376.IX.50.IPC	H376.IX.50	11 yrs	F	stage5	0	0.0293883	0	0.00660131	0.00937465	0.107597	0	0.0842205	0	0.0283181	0.0491896	0.0226538	0	0	0.482952	0.0053243	0.174381	0	0.568851	0.822848
H376.IX.50.S1C	H376.IX.50	11 yrs	F	stage5	0	0.0194183	0	0.0483979	0	0.118357	0	0.0539011	0	0.0314608	0.0344001	0.0306995	0	0	0.46041	0.00474116	0.198214	0	0.611208	0.793924
H376.IX.50.CBC	H376.IX.50	11 yrs	F	stage5	0.0304557	0.139304	0	0	0.0585913	0.0400748	0	0	0	0.0452661	0.0198082	0.012235	0	0	0.57823	0	0.0760347	0	0.304371	0.975883
H376.IX.50.MD	H376.IX.50	11 yrs	F	stage5	0	0.0597158	0	0	0.0129627	0.183983	0	0.00651255	0	0.095403	0.00719692	0.102309	0	0	0.273404	0	0.258513	0	0.477439	0.886767
H376.X.51.AMY	H376.X.51	13 yrs	F	stage5	0.0007	0.0151013	0	0	0	0.0627524	0	0.0983236	0	0.288087	0.0593954	0.0223743	0	0	0.294063	0	0.159157	0	0.497896	0.877741
H376.X.51.STC	H376.X.51	13 yrs	F	stage5	0	0.0614831	0	0.0542496	0	0.0575355	0	0.0904925	0	0.227577	0.0458223	0.020551	0	0	0.39571	0.00611142	0.0404683	0	0.495931	0.869642
H376.X.51.MFC	H376.X.51	13 yrs	F	stage5	0	0.0235155	0	0.0126583	0	0.059133	0	0.111664	0	0.249304	0.0431419	0.0246914	0	0	0.341113	0.0128451	0.121934	0	0.572159	0.81995
H376.X.51.DFC	H376.X.51	13 yrs	F	stage5	0	0.0425217	0	0.0678331	0	0.0682224	0	0.0682701	0	0.217376	0.0406871	0.0208875	0	0	0.409445	0.0183551	0.0464019	0	0.474701	0.882296
H376.X.51.OFC	H376.X.51	13 yrs	F	stage5	0	0.0602409	0	0.0627878	0	0.0497258	0	0.0769977	0	0.227394	0.0406847	0.0195595	0	0	0.381785	0.0112475	0.0695769	0	0.436347	0.906541
H376.X.51.ITC	H376.X.51	13 yrs	F	stage5	0	0.0705984	0	0.0516664	0	0.0376378	0	0.0924975	0	0.192977	0.0300647	0.0202741	0	0	0.367307	0.0211378	0.115839	0	0.395817	0.928424
H376.X.51.HIP	H376.X.51	13 yrs	F	stage5	0	0.0415124	0	0	0.0553257	0.0517889	0	0.109041	0	0.29266	0.0720174	0.0259226	0	0	0.197562	0	0.154171	0	0.538862	0.847995
H376.X.51.VFC	H376.X.51	13 yrs	F	stage5	0	0.0467789	0	0.0575239	0	0.0506606	0	0.058096	0	0.215851	0.0352671	0.0162016	0	0	0.38573	0.0112066	0.122684	0	0.596969	0.802879
H376.X.51.A1C	H376.X.51	13 yrs	F	stage5	0	0.0282404	0	0.0260358	0	0.0653709	0	0.0772083	0	0.227871	0.048081	0.00978292	0	0	0.410715	0	0.106694	0	0.578229	0.815556
H376.X.51.V1C	H376.X.51	13 yrs	F	stage5	0	0.0417401	0	0.0359257	0	0.0513089	0	0.0799828	0	0.232225	0.0384637	0.0027681	0	0	0.321547	0	0.196039	0	0.543969	0.841395
H376.X.51.STR	H376.X.51	13 yrs	F	stage5	0.00128033	0.0478522	0	0	0	0.054706	0	0.0932724	0	0.300447	0.0626067	0.00385881	0	0	0.241503	0	0.194474	0	0.541468	0.850342
H376.X.51.M1C	H376.X.51	13 yrs	F	stage5	0	0.0288058	0	0.0638909	0	0.0593651	0	0.066339	0	0.199993	0.0324582	0.0206923	0	0	0.44114	0.0172451	0.0700711	0	0.528004	0.848715
H376.X.51.IPC	H376.X.51	13 yrs	F	stage5	0	0.0685832	0	0.0411152	0	0.0565397	0	0.0806766	0	0.212602	0.0452193	0.0141918	0	0	0.398492	0.00326977	0.07931	0	0.416554	0.917597
H376.X.51.S1C	H376.X.51	13 yrs	F	stage5	0	0.0304158	0	0.0425077	0.0206974	0.0401955	0	0.0934461	0	0.248442	0.056195	0.0113817	0	0	0.394592	0	0.0621262	0	0.565747	0.824119
H376.X.51.CBC	H376.X.51	13 yrs	F	stage5	0	0.120341	0	0	0.0841245	0.0433093	0	0.0238861	0	0.0949788	0.0425633	0.0213117	0	0	0.479535	0	0.0899498	0	0.287831	0.980894
H376.X.51.MD	H376.X.51	13 yrs	F	stage5	0.00930725	0.0580773	0	0	0.01803	0.0969777	0	0.108802	0	0.235768	0.100046	0.0204105	0	0	0.226556	0	0.126025	0	0.291034	0.997737
H376.X.53.AMY	H376.X.53	18 yrs	M	stage6	0.00338135	0.0143249	0	0	0.0611384	0.0619898	0	0.11447	0	0.207615	0.0958175	0.0206855	0	0	0.181832	0	0.238746	0	0.408501	0.937955
H376.X.53.STC	H376.X.53	18 yrs	M	stage6	0.0163148	0.0195776	0	0	0.0978375	0	0	0.131449	0	0.289951	0.113114	0.0290452	0	0	0.166633	0	0.136078	0	0.376401	0.960435
H376.X.53.MFC	H376.X.53	18 yrs	M	stage6	0	0	0	0	0.0894422	0.00476724	0.00332688	0.153879	0	0.366531	0.107579	0.0339556	0	0	0.149386	0	0.0911331	0	0.436403	0.936433
H376.X.53.DFC	H376.X.53	18 yrs	M	stage6	0.00377826	0.0012901	0	0.00405431	0	0.0864747	0	0.0892184	0	0.377768	0.0482768	0.0218527	0	0	0.311222	0.0004	0.0556675	0	0.665764	0.747023
H376.X.53.OFC	H376.X.53	18 yrs	M	stage6	0	0.0245318	0	0	0.067583	0.0762511	0	0.13613	0	0.25114	0.0435334	0.0257981	0	0	0.251537	0	0.123496	0	0.361798	0.957077
H376.X.53.ITC	H376.X.53	18 yrs	M	stage6	0	0	0	0	0.0681644	0.0281608	0	0.122741	0	0.292357	0.06452	0.0222915	0	0	0.210351	0	0.191414	0	0.453619	0.913364
H376.X.53.HIP	H376.X.53	18 yrs	M	stage6	0	0	0	0	0.0759601	0.052576	0	0.125057	0	0.134218	0.0861629	0.0354059	0	0	0.102421	0	0.388199	0	0.499844	0.903171
H376.X.53.VFC	H376.X.53	18 yrs	M	stage6	0.00613773	0.0140818	0	0	0.00153782	0.0694954	0	0.11211	0	0.33684	0.0724247	0.0290807	0	0	0.279639	0	0.0786531	0	0.427273	0.932143
H376.X.53.A1C	H376.X.53	18 yrs	M	stage6	0.0165807	0.0111783	0	0	0.0990382	0.00869744	0	0.10405	0	0.237102	0.100698	0.0103126	0	0	0.153336	0	0.259008	0	0.450614	0.919005
H376.X.53.V1C	H376.X.53	18 yrs	M	stage6	0	0.016079	0	0	0.132136	0	0.0007	0.0754564	0	0.367989	0.0939916	0.0136151	0	0	0.172771	0	0.127305	0	0.483737	0.903837
H376.X.53.STR	H376.X.53	18 yrs	M	stage6	0.00377154	0.0110997	0	0	0.14962	0.0692827	0	0.115932	0	0.214674	0.116223	0.0314464	0	0	0.0132362	0	0.274715	0	0.389934	0.966869
H376.X.53.M1C	H376.X.53	18 yrs	M	stage6	0.00714608	0.043567	0	0	0.132372	0.00185826	0	0.0854435	0	0.212198	0.0845862	0.0313016	0	0	0.156925	0	0.244603	0	0.394029	0.949817
H376.X.53.IPC	H376.X.53	18 yrs	M	stage6	0.00722343	0.0194515	0	0	0.0172194	0.0656546	0	0.122137	0	0.375387	0.0822912	0.0346022	0	0	0.22657	0	0.0494633	0	0.434188	0.937628
H376.X.53.S1C	H376.X.53	18 yrs	M	stage6	0	0.0590913	0	0	0.113144	0	0	0.105772	0	0.182276	0.0620529	0.03467	0	0	0.186723	0	0.25627	0	0.383882	0.953593
H376.X.53.CBC	H376.X.53	18 yrs	M	stage6	0.0001	0.0937885	0	0	0.109849	0.139911	0	0.101253	0	0.0350309	0.0591662	0.0210409	0	0	0.364898	0	0.0749404	0	0.179821	1.03468
H376.X.53.MD	H376.X.53	18 yrs	M	stage6	0	0	0	0	0.134048	0	0	0.176547	0	0.185225	0.108064	0.0540196	0	0	0	0	0.342097	0	0.479725	0.914465
H376.X.52.AMY	H376.X.52	19 yrs	F	stage6	0	0.0996856	0	0	0.0149736	0.0946866	0	0.058221	0	0.124369	0.0311632	0.0208848	0	0	0.392671	0.00253657	0.160809	0	0.304137	0.978377
H376.X.52.STC	H376.X.52	19 yrs	F	stage6	0	0.0579308	0	0.041083	0	0.0873724	0	0.0389356	0	0.0526417	0.0272418	0.0141472	0	0	0.557462	0.0143309	0.108854	0	0.470269	0.883058
H376.X.52.MFC	H376.X.52	19 yrs	F	stage6	0	0.0371008	0	0.0102434	0.0231582	0.0845214	0	0.0427933	0	0.0971219	0.0390651	0.0268022	0	0	0.519655	0.0118468	0.107692	0	0.541171	0.840764
H376.X.52.DFC	H376.X.52	19 yrs	F	stage6	0	0.0374649	0	0.0392994	0	0.0852489	0	0.0721471	0	0.116633	0.0346657	0.0183221	0	0	0.465471	0.0150278	0.11572	0	0.467433	0.884383
H376.X.52.OFC	H376.X.52	19 yrs	F	stage6	0	0.0368794	0	0.0129347	0.01884	0.0917812	0	0.0697578	0	0.115646	0.03697	0.0298441	0	0	0.431344	0.00691838	0.149085	0	0.542124	0.84003
H376.X.52.ITC	H376.X.52	19 yrs	F	stage6	0	0.0592241	0	0.0239421	0	0.0869989	0	0.0771393	0	0.0857693	0.0384899	0.0233016	0	0	0.411406	0	0.193729	0	0.479101	0.8792
H376.X.52.HIP	H376.X.52	19 yrs	F	stage6	0	0.0389091	0	0	0	0.114318	0	0.0631835	0	0.128395	0.0257439	0.043939	0	0	0.441607	0.0219659	0.121939	0	0.395498	0.925708
H376.X.52.VFC	H376.X.52	19 yrs	F	stage6	0	0.0689923	0	0.0242078	0.00128581	0.0832953	0	0.0459188	0	0.0642932	0.0299812	0.0344794	0	0	0.442216	0.0115148	0.193816	0	0.463929	0.888576
H376.X.52.A1C	H376.X.52	19 yrs	F	stage6	0	0.026692	0	0.0167119	0	0.06588	0	0.0179932	0	0.0217421	0.0430131	0.031488	0	0	0.565634	0	0.210845	0	0.620011	0.785005
H376.X.52.V1C	H376.X.52	19 yrs	F	stage6	0	0.0664864	0	0.0840481	0	0.0547399	0	0.0199188	0	0.0195039	0.0431601	0	0	0	0.585089	0	0.127054	0	0.482068	0.876699
H376.X.52.STR	H376.X.52	19 yrs	F	stage6	0.0118822	0.0484207	0	0	0	0.0352346	0	0.019525	0	0.136538	0.0426428	0.0179552	0	0	0.35345	0.0232852	0.311066	0	0.624412	0.782621
H376.X.52.M1C	H376.X.52	19 yrs	F	stage6	0	0.0639768	0	0	0.0124432	0.120476	0	0.0321185	0	0.0363933	0.0315707	0.0368186	0	0	0.415667	0.00717368	0.243363	0	0.588735	0.807919
H376.X.52.IPC	H376.X.52	19 yrs	F	stage6	0	0.0204619	0	0.0279004	0.00199349	0.0669307	0	0.0447782	0	0.0684333	0.0493381	0.0207444	0	0	0.585638	0.00701293	0.106768	0	0.505837	0.862305
H376.X.52.S1C	H376.X.52	19 yrs	F	stage6	0	0.0610968	0	0.029159	0.00211032	0.0664511	0	0.00286193	0	0.0419363	0.0382868	0.029888	0	0	0.52499	0.0152711	0.187948	0	0.591162	0.806902
H376.X.52.CBC	H376.X.52	19 yrs	F	stage6	0.00282525	0.099419	0	0	0.0788074	0.0892721	0	0.015322	0	0.0309368	0.0420088	0.0222251	0	0	0.516014	0	0.10317	0	0.334671	0.957247
H376.X.52.MD	H376.X.52	19 yrs	F	stage6	0	0.0727096	0	0.0158067	0.0189912	0.0408987	0	0.0220896	0	0.0164554	0.0303406	0.0570831	0	0	0.54439	0	0.181235	0	0.552352	0.833039
H376.XI.60.AMY	H376.XI.60	21 yrs	F	stage6	0	0.0391901	0	0	0	0.0718183	0	0.0672998	0	0.0922818	0.0267908	0.0424941	0	0	0.414667	0.00845851	0.237	0	0.626825	0.780264
H376.XI.60.STC	H376.XI.60	21 yrs	F	stage6	0	0.042409	0	0.0163284	0	0.0750451	0	0.0304265	0	0.0806326	0.0226732	0.035985	0	0	0.473735	0.0365992	0.186166	0	0.54941	0.834978
H376.XI.60.MFC	H376.XI.60	21 yrs	F	stage6	0	0.0546815	0	0.0114201	0.00729615	0.083017	0	0.0474508	0	0.0987924	0.0265472	0.0396441	0	0	0.377123	0.0240773	0.229951	0	0.551816	0.83376
H376.XI.60.DFC	H376.XI.60	21 yrs	F	stage6	0	0.0260845	0	0.0108143	0	0.0795828	0	0.0494436	0	0.110977	0.0272327	0.028479	0	0	0.448386	0.0220287	0.196971	0	0.558336	0.829102
H376.XI.60.OFC	H376.XI.60	21 yrs	F	stage6	0	0.014942	0	0.00980999	0.00413854	0.0658831	0	0.0685569	0	0.128685	0.0417224	0.0275887	0	0	0.52441	0.0152147	0.0990491	0	0.510437	0.859423
H376.XI.60.ITC	H376.XI.60	21 yrs	F	stage6	0	0.0217036	0	0.030912	0.00120557	0.0725901	0	0.0458923	0	0.112039	0.0348461	0.0250985	0	0	0.569032	0.0198987	0.0667821	0	0.489376	0.872147
H376.XI.60.HIP	H376.XI.60	21 yrs	F	stage6	0	0.0499484	0	0	0.0108559	0.0922831	0	0.0888174	0	0.145725	0.0446537	0.0331546	0	0	0.396432	0.0164964	0.121633	0	0.478904	0.87808
H376.XI.60.VFC	H376.XI.60	21 yrs	F	stage6	0	0.0406923	0	0.0482997	0	0.0617737	0	0.00519149	0	0.0557201	0.0208498	0.0438976	0	0	0.52737	0.0333245	0.162881	0	0.554737	0.831594
H376.XI.60.A1C	H376.XI.60	21 yrs	F	stage6	0	0.0398435	0	0.0210425	0	0.0705768	0	0.0338708	0	0.0426649	0.0379272	0.0199013	0	0	0.627986	0.0163807	0.0898061	0	0.514151	0.857432
H376.XI.60.V1C	H376.XI.60	21 yrs	F	stage6	0	0.0364456	0	0.0305311	0	0.0637443	0	0.0388123	0	0.0236091	0.0350238	0.0165018	0	0	0.586573	0.0160202	0.152738	0	0.556728	0.830314
H376.XI.60.STR	H376.XI.60	21 yrs	F	stage6	0	0.0613538	0	0	0	0.0912571	0	0.0596565	0	0.0994401	0.0510251	0.0117441	0	0	0.267632	0	0.357892	0	0.677359	0.736714
H376.XI.60.M1C	H376.XI.60	21 yrs	F	stage6	0	0.0526155	0	0.0334439	0	0.0443732	0	0.0165931	0	0.0360261	0.0193923	0.0535145	0	0	0.515759	0.0206405	0.207642	0	0.589803	0.807255
H376.XI.60.IPC	H376.XI.60	21 yrs	F	stage6	0.00565323	0.027246	0	0.0378687	0	0.0569198	0	0.0083003	0	0.0381348	0.0202906	0.0362221	0	0	0.502745	0.0061711	0.260448	0	0.615044	0.787963
H376.XI.60.S1C	H376.XI.60	21 yrs	F	stage6	0	0.047393	0	0.0418286	0	0.0517741	0	0.0020205	0	0.0370406	0.0263319	0.0256535	0	0	0.610861	0.0291548	0.127942	0	0.522368	0.852444
H376.XI.60.CBC	H376.XI.60	21 yrs	F	stage6	0.010038	0.125573	0	0.0225684	0.00993795	0.0732212	0	0	0	0.0382402	0.0266272	0.060386	0	0	0.525451	0.0221869	0.0857704	0	0.307812	0.971944
H376.XI.60.MD	H376.XI.60	21 yrs	F	stage6	0.040516	0.0318457	0	0.0193647	0	0.0853873	0	0	0	0.0121075	0.00553266	0.0446291	0	0	0.478016	0.0001	0.282501	0	0.61902	0.784953
H376.XI.50.AMY	H376.XI.50	23 yrs	M	stage6	0	0.0278262	0	0	0.0660947	0.0283632	0	0.0791782	0	0.227998	0.0638566	0.0519397	0	0	0.16023	0	0.294514	0	0.54705	0.849673
H376.XI.50.STC	H376.XI.50	23 yrs	M	stage6	0	0.0317442	0	0.00912911	0.0070965	0.0599558	0	0.0724318	0	0.220813	0.0241834	0.0229651	0	0	0.311881	0	0.2398	0	0.578329	0.817786
H376.XI.50.MFC	H376.XI.50	23 yrs	M	stage6	0	0.0443546	0	0.0151049	0	0.103194	0	0.0371972	0	0.203402	0.0227034	0.0193766	0	0	0.361208	0.00495016	0.188509	0	0.618367	0.786593
H376.XI.50.DFC	H376.XI.50	23 yrs	M	stage6	0	0.0338812	0	0.0214839	0.00934572	0.0740541	0	0.0944678	0	0.191918	0.0550169	0.0367042	0	0	0.343965	0	0.139163	0	0.457831	0.892728
H376.XI.50.OFC	H376.XI.50	23 yrs	M	stage6	0	0.0303397	0	0.0113354	0.00597538	0.0874066	0	0.0744987	0	0.193681	0.024352	0.0257207	0	0	0.305816	0	0.240874	0	0.574009	0.819918
H376.XI.50.ITC	H376.XI.50	23 yrs	M	stage6	0	0.0235707	0	0	0.0353279	0.0305077	0	0.0968857	0	0.306565	0.0450031	0.0437148	0	0	0.263598	0.0244632	0.130364	0	0.564897	0.828271
H376.XI.50.HIP	H376.XI.50	23 yrs	M	stage6	0.00316977	0.0221847	0	0	0.0417336	0.0440215	0	0.0915615	0	0.180873	0.0506544	0.0515902	0	0	0.179662	0	0.334549	0	0.582328	0.822451
H376.XI.50.VFC	H376.XI.50	23 yrs	M	stage6	0	0.0215046	0	0.0015064	0.0127759	0.0970178	0	0.0595549	0	0.193724	0.0231149	0.0226502	0	0	0.357121	0	0.21103	0	0.615953	0.788091
H376.XI.50.A1C	H376.XI.50	23 yrs	M	stage6	0	0.0368534	0	0.0134186	0.0256616	0.0593621	0	0.038032	0	0.19791	0.044219	0.0247078	0	0	0.319445	0	0.240391	0	0.667578	0.746333
H376.XI.50.V1C	H376.XI.50	23 yrs	M	stage6	0	0.0467561	0	0.0328104	0.00882432	0.0616148	0	0.0938611	0	0.189947	0.059359	0.0269796	0	0	0.331489	0	0.148359	0	0.456751	0.893658
H376.XI.50.STR	H376.XI.50	23 yrs	M	stage6	0	0.0480116	0	0	0	0.0373171	0	0.0960953	0	0.315622	0.0696851	0.00297975	0	0	0.210355	0	0.219934	0	0.622255	0.78767
H376.XI.50.M1C	H376.XI.50	23 yrs	M	stage6	0	0.019922	0	0	0.0037113	0.0746562	0	0.0702768	0	0.293879	0.0454347	0.0271073	0	0	0.333362	0	0.131651	0	0.547775	0.840439
H376.XI.50.IPC	H376.XI.50	23 yrs	M	stage6	0	0.030525	0	0.0302285	0.00972846	0.050238	0	0.0201546	0	0.225146	0.0360174	0.0318272	0	0	0.357022	0.0181353	0.190977	0	0.659943	0.75317
H376.XI.50.S1C	H376.XI.50	23 yrs	M	stage6	0	0.0357172	0	0	0	0.101189	0	0.0322025	0	0.205464	0.0268172	0.02866	0	0	0.354239	0.0116767	0.204034	0	0.648865	0.762602
H376.XI.50.CBC	H376.XI.50	23 yrs	M	stage6	0	0.134336	0	0	0.108565	0.0520065	0	0.0372621	0	0.0978497	0.0468888	0.0280007	0	0	0.394903	0	0.100189	0	0.240954	1.0036
H376.XI.50.MD	H376.XI.50	23 yrs	M	stage6	0.013375	0.0203896	0	0	0.0711222	0.0314248	0	0.0963372	0	0.230431	0.0699171	0.0457108	0	0	0.146185	0	0.275108	0	0.440293	0.927519
H376.XI.52.AMY	H376.XI.52	30 yrs	F	stage6	0	0.0519468	0	0.0225191	0.0004	0.0658257	0	0.0856401	0	0.135618	0.0353196	0.0190717	0	0	0.392343	0	0.191346	0	0.545405	0.837793
H376.XI.52.STC	H376.XI.52	30 yrs	F	stage6	0	0.0396183	0	0.0433221	0.0146625	0.0929922	0	0.0597625	0	0.0106428	0.0405489	0.0156163	0	0	0.565465	0	0.11737	0	0.453449	0.893121
H376.XI.52.MFC	H376.XI.52	30 yrs	F	stage6	0	0.0796325	0	0.0366804	0.00453633	0.0884435	0	0.074086	0	0.0311718	0.0376669	0.0328672	0	0	0.517201	0.00751244	0.0902017	0	0.38654	0.928996
H376.XI.52.DFC	H376.XI.52	30 yrs	F	stage6	0	0.0435007	0	0.0149323	0.0167708	0.0774674	0	0.0361185	0	0.0382192	0.0401323	0.0320485	0	0	0.507974	0	0.192836	0	0.511645	0.85941
H376.XI.52.OFC	H376.XI.52	30 yrs	F	stage6	0	0.0997829	0	0.0300716	0.00557203	0.0634483	0	0.076863	0	0.044723	0.0298093	0.0157017	0	0	0.523463	0.0017487	0.108817	0	0.306387	0.972774
H376.XI.52.ITC	H376.XI.52	30 yrs	F	stage6	0	0.0835798	0	0.0226565	0.0234235	0.102866	0	0.0578305	0	0.0230851	0.0396288	0.0124622	0	0	0.567837	0	0.0666299	0	0.406172	0.919392
H376.XI.52.HIP	H376.XI.52	30 yrs	F	stage6	0	0.0263391	0	0	0.0236949	0.142214	0	0.0916357	0	0.0392273	0.0509397	0.0332875	0	0	0.440861	0	0.151801	0	0.34389	0.952968
H376.XI.52.VFC	H376.XI.52	30 yrs	F	stage6	0	0.0608738	0	0	0.00385696	0.122761	0	0.0741202	0	0.00596853	0.0337885	0.0277826	0	0	0.456302	0	0.214546	0	0.368949	0.948266
H376.XI.52.A1C	H376.XI.52	30 yrs	F	stage6	0	0.0700206	0	0	0.0243703	0.0906264	0	0.0964328	0	0.00583859	0.0357301	0.0189882	0	0.00347542	0.474173	0	0.180345	0	0.298171	0.983164
H376.XI.52.V1C	H376.XI.52	30 yrs	F	stage6	0	0.0817228	0	0.0428315	0.00448364	0.0533146	0	0.0505305	0	0.00634418	0.0403255	0.0221429	0	0	0.606248	0	0.0920561	0	0.461786	0.888788
H376.XI.52.STR	H376.XI.52	30 yrs	F	stage6	0.00228351	0.0570286	0	0	0.00693502	0.101802	0	0.0953501	0	0.0547684	0.0619492	0.0246683	0	0	0.308585	0	0.28663	0	0.557564	0.831729
H376.XI.52.M1C	H376.XI.52	30 yrs	F	stage6	0	0.0705618	0	0.0095863	0	0.115596	0	0.0594742	0	0.00809561	0.0318048	0.0154299	0	0	0.549081	0.00160728	0.138763	0	0.396854	0.92667
H376.XI.52.IPC	H376.XI.52	30 yrs	F	stage6	0	0.0527411	0	0.0429709	0.0142262	0.0774609	0	0.0734245	0	0.013094	0.0377718	0.0234533	0	0	0.576246	0	0.0886117	0	0.405913	0.91982
H376.XI.52.S1C	H376.XI.52	30 yrs	F	stage6	0	0.0688848	0	0.0195995	0.011608	0.10039	0	0.0402234	0	0.00940116	0.0437341	0.0170185	0	0	0.554717	0	0.134424	0	0.420623	0.912675
H376.XI.52.CBC	H376.XI.52	30 yrs	F	stage6	0	0.124208	0	0	0.0571217	0.100869	0	0.0117653	0	0.00530166	0.0645376	0.0224367	0	0	0.525599	0	0.0881608	0	0.356284	0.946114
H376.XI.52.MD	H376.XI.52	30 yrs	F	stage6	0.0201229	0.0919342	0	0	0.0343673	0.0796041	0	0.0394678	0	0.00138858	0.032957	0.028072	0	0	0.49557	0	0.176516	0	0.448167	0.898063
H376.XI.53.AMY	H376.XI.53	36 yrs	M	stage6	0	0.0670191	0	0.00259722	0	0.0757945	0	0.0912892	0	0.224122	0.0278881	0.0233028	0	0	0.350856	0.00267266	0.134458	0	0.419248	0.919488
H376.XI.53.STC	H376.XI.53	36 yrs	M	stage6	0	0.0721232	0	0.0505328	0.0162624	0.087447	0	0.00200738	0	0.0371909	0.0372406	0.0235841	0	0	0.558144	0.0107145	0.104753	0	0.486837	0.873373
H376.XI.53.MFC	H376.XI.53	36 yrs	M	stage6	0	0.0338845	0	0.0579618	0.0421014	0.0622495	0	0.0430546	0	0.0442449	0.0359583	0.0208878	0	0	0.620982	0.00632343	0.0323513	0	0.527012	0.849679
H376.XI.53.DFC	H376.XI.53	36 yrs	M	stage6	0	0.0400133	0	0.0833653	0.00481876	0.0570495	0	0.0078485	0	0.0556069	0.0449584	0.0235785	0	0	0.590867	0.00980998	0.0820842	0	0.543212	0.839618
H376.XI.53.OFC	H376.XI.53	36 yrs	M	stage6	0	0.0474294	0	0.0528991	0.0274465	0.0722045	0	0	0	0.0621464	0.0346137	0.0215785	0	0	0.582406	0.00172864	0.0975474	0	0.548111	0.836367
H376.XI.53.ITC	H376.XI.53	36 yrs	M	stage6	0	0.0212764	0	0.0586721	0.00972921	0.0575376	0	0.106774	0	0.132718	0.0431242	0.025371	0	0	0.477786	0	0.067011	0	0.431622	0.904335
H376.XI.53.HIP	H376.XI.53	36 yrs	M	stage6	0.0133678	0.0255608	0	0	0.00842918	0.102162	0	0.096627	0	0.127132	0.0452986	0.0419308	0	0	0.395952	0.00150765	0.142033	0	0.416747	0.913861
H376.XI.53.VFC	H376.XI.53	36 yrs	M	stage6	0	0.0380055	0	0.0999791	0	0.0749719	0	0	0	0.0317568	0.021377	0.032759	0	0	0.546408	0.0179281	0.136815	0	0.539339	0.841725
H376.XI.53.A1C	H376.XI.53	36 yrs	M	stage6	0	0.0437307	0	0.0708104	0.0187579	0.0285478	0	0.0195916	0	0.0226542	0.0363225	0.0308341	0	0	0.572268	0.00725596	0.149227	0	0.507749	0.861437
H376.XI.53.V1C	H376.XI.53	36 yrs	M	stage6	0	0.0552732	0	0.0876193	0	0.0517045	0	0.0224208	0	0.031003	0.0363512	0.0133225	0	0	0.596912	0	0.105393	0	0.47368	0.881551
H376.XI.53.STR	H376.XI.53	36 yrs	M	stage6	0.00157528	0.0287059	0	0	0	0.0551347	0	0.0873848	0	0.151969	0.0579027	0.0060052	0	0	0.35231	0	0.259012	0	0.610183	0.792269
H376.XI.53.M1C	H376.XI.53	36 yrs	M	stage6	0	0.0898017	0	0.0458722	0.0333657	0.0779759	0	0	0	0.0386875	0.0431417	0.021902	0	0	0.522486	0	0.126767	0	0.448913	0.8953
H376.XI.53.IPC	H376.XI.53	36 yrs	M	stage6	0	0.0728458	0	0.113914	0.0126074	0.0503817	0	0	0	0.0384758	0.0310245	0.029018	0	0	0.576395	0.0138809	0.0614566	0	0.509113	0.860342
H376.XI.53.S1C	H376.XI.53	36 yrs	M	stage6	0	0.0440988	0	0.0972232	0	0.118202	0	0	0	0.0598305	0.0344134	0.0211392	0	0	0.544514	0.0130969	0.0674825	0	0.506279	0.861907
H376.XI.53.CBC	H376.XI.53	36 yrs	M	stage6	0	0.121296	0	0	0.0743603	0.047163	0	0.0323381	0	0.0186769	0.0386612	0.0158611	0	0	0.570609	0	0.0810349	0	0.278729	0.9884
H376.XI.53.MD	H376.XI.53	36 yrs	M	stage6	0	0.0578969	0	0	0.0458489	0.0792007	0	0.0557466	0	0.0243955	0.0555395	0.038088	0	0	0.524939	0	0.118345	0	0.361076	0.943686
H376.XI.54.AMY	H376.XI.54	37 yrs	M	stage6	0.00217863	0.00604988	0	0	0.00967449	0.0654868	0	0.0882008	0	0.197633	0.0236231	0.0360717	0	0	0.363419	0	0.207662	0	0.547486	0.837911
H376.XI.54.STC	H376.XI.54	37 yrs	M	stage6	0	0.081845	0	0.0186201	0.00828276	0.0787526	0	0.039726	0	0.0716448	0.0441128	0.0179187	0	0	0.494078	0.001	0.144032	0	0.461444	0.888383
H376.XI.54.MFC	H376.XI.54	37 yrs	M	stage6	0.00594191	0	0	0.109725	0	0.0111478	0	0	0	0.131208	0.0130287	0.0296585	0	0	0.612928	0.0384516	0.0479106	0	0.612156	0.793024
H376.XI.54.DFC	H376.XI.54	37 yrs	M	stage6	0	0.0336458	0	0.0712315	0	0.0422498	0	0	0	0.108902	0.023721	0.0407964	0	0	0.42781	0.0229633	0.22868	0	0.660094	0.754858
H376.XI.54.OFC	H376.XI.54	37 yrs	M	stage6	0	0.0807187	0	0.0564228	0	0.0441458	0	0.04125	0	0.128094	0.0230002	0.0192486	0	0	0.408962	0.0135492	0.184609	0	0.527175	0.849467
H376.XI.54.ITC	H376.XI.54	37 yrs	M	stage6	0	0	0	0.0263767	0.0230645	0.0294161	0	0.0472552	0	0.126704	0.0286188	0.0367929	0	0	0.532607	0.0151095	0.134056	0	0.580485	0.814524
H376.XI.54.HIP	H376.XI.54	37 yrs	M	stage6	0.00610709	0.0581049	0	0.0273704	0	0.0826238	0	0.00677359	0	0.0891886	0.0192155	0.0393876	0	0	0.475581	0.0151433	0.180504	0	0.59643	0.803793
H376.XI.54.VFC	H376.XI.54	37 yrs	M	stage6	0	0.0519241	0	0.0491725	0	0.06021	0	0.00959686	0	0.0642483	0.0373975	0.0358601	0	0	0.461678	0.0146578	0.215255	0	0.578917	0.815001
H376.XI.54.A1C	H376.XI.54	37 yrs	M	stage6	0.00680056	0.0258961	0	0.0665198	0	0.0242293	0	0.0201263	0	0.0890327	0.0495534	0.0270389	0	0	0.499899	0.0199549	0.170949	0	0.582956	0.812958
H376.XI.54.V1C	H376.XI.54	37 yrs	M	stage6	0.00751894	0.0426858	0	0.0263704	0	0.0727296	0	0.0223972	0	0.0380098	0.029214	0.0215449	0	0	0.500674	0.00100617	0.237849	0	0.576185	0.816822
H376.XI.54.STR	H376.XI.54	37 yrs	M	stage6	0.0285652	0.0471567	0	0	0	0.0416304	0	0.0465265	0	0.159855	0.0223862	0	0	0	0.357769	0	0.296111	0	0.69342	0.721908
H376.XI.54.M1C	H376.XI.54	37 yrs	M	stage6	0	0.0481569	0	0.0903567	0	0.071376	0	0	0	0.055372	0.0278693	0.0310718	0	0	0.474937	0.0227258	0.178135	0	0.546298	0.837107
H376.XI.54.IPC	H376.XI.54	37 yrs	M	stage6	0	0.0553141	0	0.047302	0.00681085	0.0786156	0	0.0157663	0	0.118364	0.0576837	0.0242076	0	0	0.447453	0.00754654	0.140937	0	0.557647	0.830332
H376.XI.54.S1C	H376.XI.54	37 yrs	M	stage6	0	0.0765635	0.00177872	0.0353008	0.00401658	0.0844071	0	0	0	0.0469384	0.0610552	0.0131097	0	0	0.600172	0.00156649	0.0750912	0	0.467781	0.884818
H376.XI.54.CBC	H376.XI.54	37 yrs	M	stage6	0	0.0446344	0	0	0.0951661	0.160119	0	0.133751	0	0.0372131	0.0642209	0.0302453	0	0	0.334665	0	0.0999854	0	0.234648	1.00674
H376.XI.54.MD	H376.XI.54	37 yrs	M	stage6	0.012892	0.0969099	0	0.00431688	0.0174748	0.105186	0	0.00157254	0	0.0104713	0.0502866	0.0404545	0	0	0.521525	0	0.13891	0	0.482383	0.87637
H376.XI.56.AMY	H376.XI.56	40 yrs	F	stage6	0	0	0	0	0.00416337	0.16198	0.0346813	0.138098	0	0.0594428	0.0831073	0.0354648	0	0	0.395801	0	0.0872609	0	0.306064	0.968077
H376.XI.56.STC	H376.XI.56	40 yrs	F	stage6	0.0004	0.0565883	0	0.050176	0.0117912	0.0123229	0	0.0259493	0	0.0175419	0.0508496	0.0276772	0	0	0.626827	0	0.119848	0	0.460911	0.89042
H376.XI.56.MFC	H376.XI.56	40 yrs	F	stage6	0	0.0166648	0	0.0269333	0	0.0978321	0	0.0625646	0	0.0504765	0.0395874	0.0457369	0	0	0.484789	0.0145529	0.160863	0	0.476388	0.879829
H376.XI.56.DFC	H376.XI.56	40 yrs	F	stage6	0	0	0	0	0.0509993	0.15296	0	0.0917507	0	0.0317204	0.0729955	0.0242588	0	0	0.488811	0	0.0865041	0	0.325728	0.959005
H376.XI.56.OFC	H376.XI.56	40 yrs	F	stage6	0	0.0364438	0	0.0312312	0.023627	0.0284669	0	0.0413557	0	0.0300697	0.0506865	0.0264355	0	0	0.663628	0	0.0680558	0	0.461704	0.889916
H376.XI.56.ITC	H376.XI.56	40 yrs	F	stage6	0	0.029424	0	0	0.0544542	0.0455167	0	0.0715006	0	0.0468779	0.0642518	0.0350629	0	0	0.54994	0	0.102972	0	0.350028	0.949339
H376.XI.56.HIP	H376.XI.56	40 yrs	F	stage6	0	0	0	0	0.0451063	0.194375	0.0505209	0.120926	0	0.0595411	0.0685052	0.0277042	0	0	0.379927	0	0.0533937	0	0.278803	0.983145
H376.XI.56.VFC	H376.XI.56	40 yrs	F	stage6	0	0.0432047	0	0.0312706	0.0134452	0.0301271	0	0.0233777	0	0.0295054	0.0614862	0.0352584	0	0	0.6155	0.00194278	0.114882	0	0.462128	0.88936
H376.XI.56.A1C	H376.XI.56	40 yrs	F	stage6	0	0	0	0	0.0659716	0.172974	0	0.132902	0	0.0354423	0.0828094	0.0138353	0	0	0.429592	0	0.0664734	0	0.286812	0.977545
H376.XI.56.V1C	H376.XI.56	40 yrs	F	stage6	0	0.0538337	0	0.0253759	0.0512151	0.0382413	0	0.0380489	0	0.0346329	0.0901373	0.0238534	0	0	0.552981	0	0.0916805	0	0.441494	0.89892
H376.XI.56.STR	H376.XI.56	40 yrs	F	stage6	0.00579888	0.00277605	0	0	0.0111131	0.0783978	0	0.0989931	0	0.0746983	0.0889111	0.0259054	0	0	0.309586	0	0.30382	0	0.517019	0.863539
H376.XI.56.M1C	H376.XI.56	40 yrs	F	stage6	0	0	0	0.00878008	0.052113	0.198353	0	0.171469	0	0.0301433	0.0874163	0.0133003	0	0	0.381769	0	0.0566558	0	0.250849	0.996928
H376.XI.56.IPC	H376.XI.56	40 yrs	F	stage6	0	0.020181	0	0.0837008	0	0.0779991	0	0.012713	0	0.0253472	0.0425264	0.0172408	0	0	0.659686	0.00306264	0.0575432	0	0.494888	0.869658
H376.XI.56.S1C	H376.XI.56	40 yrs	F	stage6	0	0.00709056	0	0	0.0498853	0.131833	0	0.0905223	0	0.031328	0.0874441	0.0305797	0	0	0.483597	0	0.0877201	0	0.362041	0.940036
H376.XI.56.CBC	H376.XI.56	40 yrs	F	stage6	0	0.00706524	0	0	0.0780442	0.16984	0	0.176691	0	0.00607042	0.123574	0.033972	0	0.00539178	0.360927	0	0.0384235	0	0.260432	0.992316
H376.XI.56.MD	H376.XI.56	40 yrs	F	stage6	0.0146485	0.0318871	0	0	0.0594743	0.0603925	0	0.0914071	0	0.0301662	0.105121	0.0366954	0	0	0.340764	0	0.229445	0	0.407092	0.924456

## Sheet: Table S3_2
Supplemental Table S3. Cell type composition score of BrainSpan samples based on cell type deconvolution analysis based on panel B.
Sample	Individual	Age	Gender	Stage_ordinal	Ex1	Ex2	Ex3	Ex4	Ex5	Ex6	Ex7	Ex8	In1	In2	In3	In4	In5	In6	In7	In8	P-value	Pearson Correlation	RMSE
H376.IIB.50.AMY	H376.IIB.50	12 pcw	F	stage1	0.172597	0	0	0.14767	0.245637	0	0	0	0	0	0.167365	0.12175	0	0	0	0.144981	0.44	0.0103447	1.09585
H376.IIB.50.STC	H376.IIB.50	12 pcw	F	stage1	0.252083	0	0	0.259292	0.196832	0	0	0.0969821	0	0	0.106302	0.0503484	0	0	0	0.0381604	0.16	0.0592124	1.07061
H376.IIB.50.MFC	H376.IIB.50	12 pcw	F	stage1	0.125359	0	0.0742276	0.373988	0	0.0616445	0	0.150157	0	0	0.100742	0.0438992	0	0	0	0.0699823	0.19	0.0460165	1.06958
H376.IIB.50.DFC	H376.IIB.50	12 pcw	F	stage1	0.166734	0	0	0.364107	0.0590647	0.0395372	0	0.067065	0	0.00780805	0.0982589	0.14553	0	0	0	0.0518952	0.22	0.0391116	1.08002
H376.IIB.50.OFC	H376.IIB.50	12 pcw	F	stage1	0.184447	0	0	0.482291	0	0	0	0.0921268	0	0	0.0856247	0.0976748	0	0.00309437	0	0.0547419	0.16	0.0554858	1.06543
H376.IIB.50.ITC	H376.IIB.50	12 pcw	F	stage1	0.218654	0	0	0.225741	0.157153	0	0	0.111	0	0	0.0467505	0.191046	0	0	0	0.0496558	0.19	0.0446766	1.08009
H376.IIB.50.HIP	H376.IIB.50	12 pcw	F	stage1	0.0353307	0	0	0.427675	0.0288695	0	0	0.125332	0	0	0.139005	0.0905919	0	0	0	0.153195	0.45	0.00985423	1.083
H376.IIB.50.VFC	H376.IIB.50	12 pcw	F	stage1	0.264899	0	0	0.306682	0.124403	0.016947	0	0.0519306	0	0.0168265	0.0896556	0.128657	0	0	0	0	0.16	0.0559091	1.07495
H376.IIB.50.A1C	H376.IIB.50	12 pcw	F	stage1	0.231895	0	0	0.250461	0.202855	0	0	0.0778699	0	0	0.0939805	0.136655	0	0	0	0.00628281	0.16	0.0538704	1.07769
H376.IIB.50.V1C	H376.IIB.50	12 pcw	F	stage1	0.232569	0	0	0.298974	0.00965023	0.0969751	0	0.162743	0	0	0.0835843	0.0726823	0	0	0	0.0428218	0.27	0.0349007	1.08072
H376.IIB.50.STR	H376.IIB.50	12 pcw	F	stage1	0.185375	0	0.0209963	0.0930703	0.316592	0	0	0	0	0	0.102826	0.0577949	0.0311031	0	0	0.192242	0.22	0.0389119	1.08052
H376.IIB.50.M1C	H376.IIB.50	12 pcw	F	stage1	0.216179	0	0	0.268855	0.0154458	0.106128	0	0.0865902	0	0.0025246	0.137658	0.0960737	0	0	0	0.0705455	0.19	0.0449417	1.07707
H376.IIB.50.IPC	H376.IIB.50	12 pcw	F	stage1	0.219074	0	0	0.379412	0.111815	0.0277145	0	0.0581422	0	0	0.0939994	0.0832169	0	0	0	0.0266258	0.16	0.0615074	1.06972
H376.IIB.50.S1C	H376.IIB.50	12 pcw	F	stage1	0.210813	0	0.0111859	0.289689	0.0533167	0.0785081	0	0.10246	0	0	0.121695	0.040911	0	0	0	0.091421	0.16	0.0503004	1.07032
H376.IIB.50.CBC	H376.IIB.50	12 pcw	F	stage1	0.085387	0	0.103198	0.203389	0.093472	0.0236928	0	0.031603	0	0.00524182	0.0954093	0.203746	0	0	0	0.154861	0.27	0.0305728	1.08616
H376.IIB.50.MD	H376.IIB.50	12 pcw	F	stage1	0.182231	0	0.19219	0.122082	0.19209	0.0003	0	0.0232047	0	0	0.117976	0.034708	0	0	0	0.135227	0.16	0.0620245	1.05815
H376.IIB.51.AMY	H376.IIB.51	12 pcw	F	stage1	0.217339	0	0	0.196029	0.169273	0	0	0	0	0	0.126512	0.128979	0	0	0	0.161868	0.23	0.0385335	1.07592
H376.IIB.51.STC	H376.IIB.51	12 pcw	F	stage1	0.201512	0	0	0.379868	0.136746	0.0204754	0	0.112275	0.0005	0	0.0718086	0.0116859	0	0	0	0.0651063	0.14	0.0680674	1.06868
H376.IIB.51.MFC	H376.IIB.51	12 pcw	F	stage1	0.212645	0	0.0142979	0.454697	0.0461095	0.0575149	0	0.0613721	0.00593235	0	0.0777245	0.00240777	0	0	0	0.0672988	0.14	0.0678806	1.06761
H376.IIB.51.DFC	H376.IIB.51	12 pcw	F	stage1	0.185745	0	0	0.40803	0.14511	0.0452352	0	0.0664383	0	0	0.0694921	0.0301312	0	0	0	0.0498178	0.14	0.0660589	1.07353
H376.IIB.51.OFC	H376.IIB.51	12 pcw	F	stage1	0.187931	0	0	0.359191	0.174766	0.0642623	0	0.0822524	0	0	0.045126	0.0164787	0.0109735	0	0	0.0590192	0.16	0.0503915	1.08598
H376.IIB.51.ITC	H376.IIB.51	12 pcw	F	stage1	0.209723	0	0	0.300331	0.202525	0	0	0.0796584	0.0280398	0	0.0694654	0.0413962	0	0	0	0.0688619	0.14	0.0714281	1.06567
H376.IIB.51.HIP	H376.IIB.51	12 pcw	F	stage1	0.134851	0	0.25605	0.142372	0	0	0	0.0612354	0	0.0161951	0	0.212563	0	0	0	0.176734	0.33	0.0214368	1.07589
H376.IIB.51.VFC	H376.IIB.51	12 pcw	F	stage1	0.216257	0	0	0.32993	0.14207	0.0753635	0	0.082479	0	0	0.071925	0.0172525	0.00449098	0	0	0.0602316	0.16	0.0574997	1.07854
H376.IIB.51.A1C	H376.IIB.51	12 pcw	F	stage1	0.215404	0	0	0.426056	0.150555	0.0119876	0	0.0817003	0.00311062	0	0.055508	0.0277203	0	0	0	0.0279582	0.12	0.084295	1.06561
H376.IIB.51.V1C	H376.IIB.51	12 pcw	F	stage1	0.247865	0	0	0.270922	0.0812742	0.0871353	0	0.151648	0.0545475	0	0.0226624	0.0839463	0	0	0	0	0.22	0.0418253	1.08681
H376.IIB.51.STR	H376.IIB.51	12 pcw	F	stage1	0.135538	0	0	0.185932	0.206099	0	0	0	0	0.00744589	0.130545	0.139923	0	0	0	0.194517	0.29	0.027046	1.08577
H376.IIB.51.M1C	H376.IIB.51	12 pcw	F	stage1	0.303961	0	0	0.275415	0	0.122667	0	0.141591	0	0	0.080483	0.0297356	0	0	0	0.0461482	0.16	0.0562163	1.07477
H376.IIB.51.IPC	H376.IIB.51	12 pcw	F	stage1	0.212538	0	0	0.331296	0.0924275	0.0798034	0	0.117702	0	0	0.0798543	0.030958	0	0	0	0.0554204	0.14	0.0712034	1.06905
H376.IIB.51.S1C	H376.IIB.51	12 pcw	F	stage1	0.227345	0	0	0.302427	0.0605964	0.117298	0	0.109263	0	0	0.0815689	0.024388	0	0	0	0.0771145	0.14	0.0664173	1.07173
H376.IIB.51.CBC	H376.IIB.51	12 pcw	F	stage1	0.133722	0	0	0.157627	0.159523	0.0222064	0	0.0210266	0	0.0003	0.150687	0.222741	0	0	0	0.132127	0.28	0.0293235	1.10365
H376.IIB.51.MD	H376.IIB.51	12 pcw	F	stage1	0.214488	0	0	0.263523	0.212006	0	0	0.0366958	0.0125003	0	0.0831286	0.0373816	0	0	0	0.140277	0.16	0.0565468	1.06691
H376.IIB.52.AMY	H376.IIB.52	12 pcw	F	stage1	0.23328	0	0	0.22362	0.163085	0	0	0.00845404	0	0	0.120876	0.107525	0	0	0	0.14316	0.22	0.0432738	1.07146
H376.IIB.52.STC	H376.IIB.52	12 pcw	F	stage1	0.178292	0	0.0824994	0.293663	0.159454	0.0233399	0	0.0636545	0.0172507	0	0.0859079	0.0008	0	0	0	0.0951566	0.12	0.0780672	1.05983
H376.IIB.52.MFC	H376.IIB.52	12 pcw	F	stage1	0.169759	0	0	0.32842	0.0384434	0.0714738	0	0.145226	0	0	0.0941283	0.0249699	0	0	0	0.12758	0.16	0.0513448	1.06848
H376.IIB.52.DFC	H376.IIB.52	12 pcw	F	stage1	0.188125	0	0	0.365032	0.0507986	0.0964318	0	0.0839176	0	0	0.117166	0.00836211	0.00719088	0	0	0.0829752	0.16	0.0544993	1.07369
H376.IIB.52.OFC	H376.IIB.52	12 pcw	F	stage1	0.204726	0	0	0.389261	0.11424	0.0235912	0	0.0844906	0	0	0.0977374	0.00187667	0.0067882	0	0	0.0772885	0.14	0.0703505	1.06482
H376.IIB.52.ITC	H376.IIB.52	12 pcw	F	stage1	0.200006	0	0	0.297438	0.224532	0	0	0.0934096	0.0420063	0	0.0568669	0.0325066	0	0	0	0.0532351	0.14	0.0723749	1.0689
H376.IIB.52.HIP	H376.IIB.52	12 pcw	F	stage1	0.221744	0	0	0.287812	0.147775	0	0	0.132591	0	0	0.0709898	0.0590322	0	0	0	0.0800555	0.23	0.0374108	1.07457
H376.IIB.52.VFC	H376.IIB.52	12 pcw	F	stage1	0.263027	0	0	0.353048	0.0799367	0.0516855	0	0.116753	0.0215609	0	0.0454207	0.011781	0	0	0	0.0567878	0.12	0.0845297	1.06177
H376.IIB.52.A1C	H376.IIB.52	12 pcw	F	stage1	0.18578	0	0.0512668	0.317613	0.165815	0.00671078	0	0.0802481	0.0688895	0	0.0622132	0.0277918	0	0	0	0.0336718	0.14	0.0732818	1.06612
H376.IIB.52.V1C	H376.IIB.52	12 pcw	F	stage1	0.248407	0	0	0.247913	0.0830929	0.101862	0	0.188538	0	0	0.0869543	0.027132	0	0	0	0.0161008	0.22	0.0419686	1.0875
H376.IIB.52.STR	H376.IIB.52	12 pcw	F	stage1	0.154058	0	0	0.266252	0.101247	0.0145648	0	0	0	0.00852661	0.112126	0.2083	0	0	0	0.134926	0.27	0.0317202	1.09167
H376.IIB.52.M1C	H376.IIB.52	12 pcw	F	stage1	0.194948	0	0	0.46668	0.0638655	0.0655324	0	0.0645022	0.00996034	0	0.0623586	0.0138203	0	0	0	0.0583326	0.13	0.0761979	1.06753
H376.IIB.52.IPC	H376.IIB.52	12 pcw	F	stage1	0.178018	0	0	0.319945	0.245775	0	0	0.0805383	0	0	0.0769705	0.012031	0	0	0	0.0867218	0.12	0.0826727	1.06502
H376.IIB.52.S1C	H376.IIB.52	12 pcw	F	stage1	0.21861	0	0	0.410655	0.117543	0.00579496	0	0.109164	0	0	0.0703998	0.0153063	0	0	0	0.0525269	0.12	0.0846666	1.06036
H376.IIB.52.CBC	H376.IIB.52	12 pcw	F	stage1	0.164104	0	0.0412541	0.20038	0.145353	0	0	0	0	0.0232764	0	0.175348	0	0.0348367	0.0110305	0.204417	0.22	0.0419931	1.07966
H376.IIB.52.MD	H376.IIB.52	12 pcw	F	stage1	0.107497	0	0.266117	0.0699614	0.215301	0	0	0	0.0973624	0	0.0902745	0	0.0104587	0	0	0.143028	0.16	0.0612892	1.06415
H376.IIIA.50.AMY	H376.IIIA.50	13 pcw	M	stage2	0.266825	0	0	0.333842	0.0615224	0.0254609	0	0.126855	0	0	0.082514	0.0428218	0	0	0	0.0601594	0.21	0.0439168	1.0712
H376.IIIA.50.STC	H376.IIIA.50	13 pcw	M	stage2	0.183527	0	0.0906951	0.229551	0.099054	0.0384059	0	0.138497	0	0	0.091267	0.047793	0	0	0	0.0812099	0.16	0.0577265	1.0642
H376.IIIA.50.MFC	H376.IIIA.50	13 pcw	M	stage2	0.230502	0	0	0.405076	0	0.0568813	0	0.125206	0.0343706	0	0.0630003	0.00887349	0	0	0	0.0760905	0.14	0.0717152	1.06157
H376.IIIA.50.DFC	H376.IIIA.50	13 pcw	M	stage2	0.300806	0	0	0.384532	0.0594314	0.0357918	0	0.0951009	0.00392649	0	0.0598525	0.00818253	0	0	0	0.0523764	0.12	0.0829873	1.06053
H376.IIIA.50.OFC	H376.IIIA.50	13 pcw	M	stage2	0.252126	0	0	0.331392	0.101548	0.0139061	0	0.141224	0.0026316	0	0.0584629	0.0160585	0.0112015	0	0	0.0714495	0.14	0.0703958	1.06344
H376.IIIA.50.ITC	H376.IIIA.50	13 pcw	M	stage2	0.276897	0	0	0.349696	0.0444179	0.0456566	0	0.136237	0	0	0.0642775	0.0315829	0	0	0	0.0512349	0.16	0.0521293	1.07129
H376.IIIA.50.HIP	H376.IIIA.50	13 pcw	M	stage2	0.285908	0	0	0.227623	0.0002	0.0353148	0	0.149985	0	0	0.0318973	0.149975	0	0	0	0.119116	0.16	0.0503854	1.06559
H376.IIIA.50.VFC	H376.IIIA.50	13 pcw	M	stage2	0.307531	0	0	0.356169	0.0987938	0.0134838	0	0.115467	0.0129019	0	0.0452347	0.0189053	0	0	0	0.0315124	0.14	0.0761494	1.06476
H376.IIIA.50.A1C	H376.IIIA.50	13 pcw	M	stage2	0.222438	0	0.0707262	0.25272	0.0345989	0.0655643	0	0.154758	0.00525333	0	0.0607539	0.0924351	0	0	0	0.0407524	0.16	0.0545074	1.06858
H376.IIIA.50.V1C	H376.IIIA.50	13 pcw	M	stage2	0.262974	0	0	0.23977	0.140118	0.0367645	0	0.158093	0.0102735	0	0.104243	0.0227062	0	0	0	0.0250589	0.16	0.0501604	1.07727
H376.IIIA.50.STR	H376.IIIA.50	13 pcw	M	stage2	0.142207	0	0.0687104	0.192439	0.00606612	0.0064453	0	0	0	0	0.199576	0.265811	0	0	0	0.118745	0.27	0.0326149	1.11805
H376.IIIA.50.M1C	H376.IIIA.50	13 pcw	M	stage2	0.277518	0	0	0.410064	0.0837118	0.00905072	0	0.1031	0.00328658	0	0.0558132	0.0149537	0	0	0	0.0425021	0.12	0.0827001	1.06083
H376.IIIA.50.IPC	H376.IIIA.50	13 pcw	M	stage2	0.27158	0	0	0.354909	0.129112	0.00645058	0	0.0784233	0.0336095	0	0.0758517	0.0124858	0	0	0	0.0375782	0.14	0.0692869	1.06642
H376.IIIA.50.S1C	H376.IIIA.50	13 pcw	M	stage2	0.263302	0	0	0.393721	0.107054	0.00525914	0	0.0975531	0.0124736	0	0.0682321	0.017417	0	0	0	0.0349867	0.14	0.0748452	1.06411
H376.IIIA.50.CBC	H376.IIIA.50	13 pcw	M	stage2	0.0761277	0	0.122753	0.29141	0.0371953	0.039608	0	0.0385305	0	0.00637697	0.0936336	0.18028	0	0	0	0.114084	0.19	0.0456561	1.07541
H376.IIIA.50.MD	H376.IIIA.50	13 pcw	M	stage2	0.196434	0	0.150611	0.0124956	0.225824	0	0.0006	0.0500118	0	0	0.103853	0.0902702	0	0	0	0.16987	0.16	0.0580232	1.06203
H376.IIIA.51.AMY	H376.IIIA.51	13 pcw	F	stage2	0.152933	0	0	0.148441	0.162585	0	0	0.0730501	0	0	0.127039	0.218559	0	0	0	0.117393	0.36	0.0190206	1.10128
H376.IIIA.51.STC	H376.IIIA.51	13 pcw	F	stage2	0.176297	0	0.0777401	0.187105	0.211399	0	0	0.106332	0.0959932	0	0.053217	0.0281826	0	0	0	0.0637343	0.16	0.0543185	1.0733
H376.IIIA.51.MFC	H376.IIIA.51	13 pcw	F	stage2	0.0368049	0	0.218202	0.178993	0.101829	0.0988572	0	0.118089	0	0	0.12423	0.0557842	0	0	0	0.0672105	0.28	0.0290607	1.08203
H376.IIIA.51.DFC	H376.IIIA.51	13 pcw	F	stage2	0.196992	0	0.0818047	0.290377	0	0.088677	0	0.157582	0.0130173	0	0.0870393	0.084511	0	0	0	0	0.19	0.0479615	1.07504
H376.IIIA.51.OFC	H376.IIIA.51	13 pcw	F	stage2	0.200194	0	0	0.351789	0.0792338	0.0539566	0	0.0922299	0	0	0.10468	0.038834	0	0	0	0.0790827	0.16	0.0525416	1.07028
H376.IIIA.51.ITC	H376.IIIA.51	13 pcw	F	stage2	0.215848	0	0	0.191632	0.174969	0	0	0.122309	0.0427017	0	0.108982	0.0468573	0	0	0	0.0967011	0.16	0.0587512	1.06747
H376.IIIA.51.HIP	H376.IIIA.51	13 pcw	F	stage2	0.139197	0	0	0.235542	0.111838	0	0	0.154151	0	0	0.133349	0.115383	0	0	0	0.11054	0.37	0.0184004	1.0829
H376.IIIA.51.VFC	H376.IIIA.51	13 pcw	F	stage2	0.279184	0	0	0.342298	0.103726	0.0202488	0	0.109648	0.019355	0	0.0741216	0.0190933	0.00145911	0	0	0.0308662	0.14	0.0742176	1.06433
H376.IIIA.51.A1C	H376.IIIA.51	13 pcw	F	stage2	0.22317	0	0.105574	0.245559	0.0369752	0	0	0.0699366	0	0	0.0721511	0.154429	0	0	0	0.0922055	0.14	0.0658708	1.05823
H376.IIIA.51.V1C	H376.IIIA.51	13 pcw	F	stage2	0.249943	0	0	0.142745	0.113874	0.0386817	0	0.238637	0	0	0.122472	0.0618062	0	0	0	0.0318411	0.27	0.0322754	1.08376
H376.IIIA.51.STR	H376.IIIA.51	13 pcw	F	stage2	0.162101	0	0	0.13356	0.138339	0.0380041	0	0.0228847	0	0	0.167642	0.176141	0	0	0	0.161329	0.37	0.0177385	1.10034
H376.IIIA.51.M1C	H376.IIIA.51	13 pcw	F	stage2	0.286768	0	0	0.265303	0.0347944	0.0928606	0	0.108523	0	0	0.136968	0.0300707	0	0	0	0.0447126	0.14	0.0660855	1.06752
H376.IIIA.51.IPC	H376.IIIA.51	13 pcw	F	stage2	0.235128	0	0	0.349872	0.108045	0.0287287	0	0.0821936	0	0	0.11748	0.0155934	0	0	0	0.0629591	0.14	0.0732627	1.06243
H376.IIIA.51.S1C	H376.IIIA.51	13 pcw	F	stage2	0.222658	0	0	0.267917	0.0231727	0.0857571	0	0.162549	0	0	0.141294	0.0220477	0	0	0	0.0746043	0.16	0.0564258	1.06951
H376.IIIA.51.CBC	H376.IIIA.51	13 pcw	F	stage2	0.0997385	0	0.21606	0.126817	0.101044	0	0	0.0241096	0	0.0176986	0.0873308	0.127391	0.00338171	0	0	0.196429	0.21	0.0439768	1.06483
H376.IIIA.51.MD	H376.IIIA.51	13 pcw	F	stage2	0.239593	0	0.147598	0	0.159997	0	0	0.0551698	0	0	0.143195	0.0106967	0.0532827	0	0	0.190468	0.28	0.0298288	1.0742
H376.IIIA.52.AMY	H376.IIIA.52	13 pcw	M	stage2	0.132491	0	0	0.168945	0.242353	0	0	0.0142788	0	0	0.101371	0.130025	0.0171583	0	0	0.193379	0.37	0.0152	1.09115
H376.IIIA.52.STC	H376.IIIA.52	13 pcw	M	stage2	0.235135	0	0	0.395383	0.0702624	0.0538108	0	0.0814929	0.0301291	0	0.0999141	0	0.00581047	0	0	0.0280622	0.16	0.0594787	1.07312
H376.IIIA.52.MFC	H376.IIIA.52	13 pcw	M	stage2	0.135022	0	0.0520133	0.297924	0.0868411	0	0	0.0163942	0.110781	0	0.0420442	0.0799154	0	0	0	0.179064	0.36	0.018585	1.08209
H376.IIIA.52.DFC	H376.IIIA.52	13 pcw	M	stage2	0.145146	0	0.13932	0.27719	0.137913	0.0641504	0	0.0919415	0	0	0.0775432	0.0667958	0	0	0	0	0.16	0.0535134	1.07679
H376.IIIA.52.OFC	H376.IIIA.52	13 pcw	M	stage2	0.199457	0	0.0203116	0.314758	0.181315	0	0	0.0362926	0	0	0.0523887	0.0866015	0	0	0	0.108875	0.18	0.0486395	1.07032
H376.IIIA.52.ITC	H376.IIIA.52	13 pcw	M	stage2	0.220023	0	0	0.211536	0.265871	0	0	0.127222	0	0	0.075896	0.0152466	0.00958944	0	0	0.0746157	0.14	0.0752616	1.06867
H376.IIIA.52.HIP	H376.IIIA.52	13 pcw	M	stage2	0.0302035	0	0.396121	0.147615	0	0	0.0391463	0.0247589	0	0.0213642	0.0470959	0.153263	0	0	0	0.140433	0.36	0.0184963	1.07233
H376.IIIA.52.VFC	H376.IIIA.52	13 pcw	M	stage2	0.172731	0	0.138172	0.208204	0.130772	0	0	0.123397	0	0	0.0632247	0.115936	0	0	0	0.047563	0.14	0.0685892	1.05973
H376.IIIA.52.A1C	H376.IIIA.52	13 pcw	M	stage2	0.191548	0	0	0.300035	0.190437	0	0	0.120748	0.0428591	0	0.0750891	0.00506717	0.00138718	0	0	0.0728294	0.12	0.0783485	1.06341
H376.IIIA.52.V1C	H376.IIIA.52	13 pcw	M	stage2	0.1907	0	0.0312913	0.35469	0	0.168956	0	0.087719	0	0	0.0679306	0.0987132	0	0	0	0	0.27	0.03298	1.09329
H376.IIIA.52.STR	H376.IIIA.52	13 pcw	M	stage2	0.144216	0	0.0218981	0.26103	0.182393	0.0170626	0	0.00171438	0	0	0.149773	0.0680714	0	0	0	0.153843	0.22	0.0428317	1.07338
H376.IIIA.52.M1C	H376.IIIA.52	13 pcw	M	stage2	0.109478	0	0.0717624	0.264947	0.0274271	0.121302	0	0.136014	0	0	0.118868	0.00373956	0	0	0	0.146462	0.19	0.0454477	1.07381
H376.IIIA.52.IPC	H376.IIIA.52	13 pcw	M	stage2	0.158522	0	0	0.294192	0.0595968	0.0844231	0	0.154916	0.0026119	0	0.129629	0.0108881	0	0	0	0.105221	0.15	0.0622513	1.06835
H376.IIIA.52.S1C	H376.IIIA.52	13 pcw	M	stage2	0.161596	0	0	0.297436	0.0641781	0.0977058	0	0.163538	0.00642598	0	0.0783389	0.0144578	0	0	0	0.116324	0.16	0.0592944	1.07219
H376.IIIA.52.CBC	H376.IIIA.52	13 pcw	M	stage2	0.153976	0	0	0.109742	0.213024	0	0	0	0	0.0387714	0.126069	0.25116	0	0	0.0002	0.107073	0.28	0.0285381	1.1178
H376.IIIA.52.MD	H376.IIIA.52	13 pcw	M	stage2	0.143231	0	0.0966997	0.24711	0.224465	0.0223814	0	0.0107118	0	0.0427896	0.0636956	0.0316856	0	0	0	0.11723	0.16	0.055249	1.07075
H376.IIIB.50.AMY	H376.IIIB.50	13 pcw	M	stage2	0.0593687	0	0.314943	0.135706	0	0.0323499	0	0.0549355	0	0	0.146531	0.192475	0	0	0	0.0636899	0.23	0.0369365	1.08205
H376.IIIB.50.STC	H376.IIIB.50	16 pcw	M	stage2	0.240576	0	0	0.0855957	0.132828	0	0	0.164581	0	0	0.120968	0.130287	0	0	0	0.125163	0.23	0.0377302	1.07599
H376.IIIB.50.MFC	H376.IIIB.50	16 pcw	M	stage2	0.2732	0	0	0.243873	0.0468565	0.00131603	0	0.168938	0	0	0.113897	0.0844675	0	0	0	0.0674515	0.35	0.0195735	1.07746
H376.IIIB.50.DFC	H376.IIIB.50	16 pcw	M	stage2	0.26481	0	0	0.200081	0.124679	0.00765284	0	0.122593	0	0	0.116059	0.0365809	0.00406948	0	0	0.123475	0.22	0.0431271	1.06802
H376.IIIB.50.OFC	H376.IIIB.50	16 pcw	M	stage2	0.310383	0	0.17426	0.0800861	0.0838459	0.0606647	0	0.0901793	0	0	0.106219	0.0283352	0.00780705	0	0	0.0582193	0.16	0.0612709	1.06415
H376.IIIB.50.ITC	H376.IIIB.50	16 pcw	M	stage2	0.16217	0	0.253292	0.178393	0.0160365	0	0	0.0623737	0	0	0.114067	0.0953375	0	0	0	0.11833	0.22	0.0405872	1.06084
H376.IIIB.50.HIP	H376.IIIB.50	16 pcw	M	stage2	0.074844	0	0.113882	0.277459	0.0814993	0.00120457	0	0.0434697	0	0	0.133364	0.168033	0	0	0	0.106244	0.22	0.0416015	1.07745
H376.IIIB.50.VFC	H376.IIIB.50	16 pcw	M	stage2	0.295762	0	0.0802876	0.132646	0.0859417	0	0	0.131268	0	0	0.106095	0.0764362	0	0	0	0.0915644	0.14	0.0671207	1.05628
H376.IIIB.50.A1C	H376.IIIB.50	16 pcw	M	stage2	0.219898	0	0.406325	0.0444564	0.0793574	0.0102591	0	0.0339278	0.0188391	0	0.0869546	0.0706632	0	0	0	0.0293196	0.16	0.0589513	1.05974
H376.IIIB.50.V1C	H376.IIIB.50	16 pcw	M	stage2	0.330233	0	0.124289	0.1743	0.0669962	0.0253823	0	0.0658794	0	0	0.127053	0.0428331	0	0	0	0.0430343	0.21	0.0438858	1.06891
H376.IIIB.50.STR	H376.IIIB.50	16 pcw	M	stage2	0.115403	0	0.142913	0.276649	0.045155	0.0157172	0	0.00415511	0	0.0028323	0.127494	0.132064	0	0	0	0.137617	0.16	0.0560732	1.0641
H376.IIIB.50.M1C	H376.IIIB.50	16 pcw	M	stage2	0.21215	0	0.254027	0.150944	0.0299569	0	0	0.0625363	0	0	0.0957442	0.0990921	0	0	0	0.0955491	0.19	0.0479484	1.05899
H376.IIIB.50.IPC	H376.IIIB.50	16 pcw	M	stage2	0.265591	0	0.272243	0.123848	0.0742286	0.00900633	0	0.0690696	0	0	0.0797975	0.053487	0	0	0	0.0527284	0.15	0.0631395	1.05683
H376.IIIB.50.S1C	H376.IIIB.50	16 pcw	M	stage2	0.207059	0	0.07801	0.253971	0.0229497	0.0343459	0	0.0860406	0	0	0.115779	0.0887606	0	0	0	0.113084	0.22	0.0431056	1.06521
H376.IIIB.50.CBC	H376.IIIB.50	16 pcw	M	stage2	0.0369558	0	0.113512	0.0753194	0.237568	0	0	0.0196372	0	0	0.131994	0.254944	0	0	0	0.130071	0.28	0.0297625	1.10948
H376.IIIB.50.MD	H376.IIIB.50	16 pcw	M	stage2	0.0109455	0	0.286149	0	0.0493901	0	0.0878708	0.0164562	0	0	0.159674	0.184774	0	0	0	0.20474	0.19	0.0463447	1.08153
H376.IIIB.51.AMY	H376.IIIB.51	16 pcw	M	stage2	0.172017	0	0.00110334	0.16571	0.116709	0	0	0.091155	0	0	0.1393	0.184631	0	0	0	0.129375	0.37	0.0162046	1.09399
H376.IIIB.51.STC	H376.IIIB.51	16 pcw	M	stage2	0.236975	0	0.10952	0.187568	0.0753106	0	0	0.0711193	0	0	0.120569	0.140905	0	0	0	0.0580327	0.24	0.036386	1.07403
H376.IIIB.51.MFC	H376.IIIB.51	16 pcw	M	stage2	0.322803	0	0	0.346617	0	0.0588796	0	0.0294056	0	0	0.0662574	0.176037	0	0	0	0	0.16	0.0543453	1.07558
H376.IIIB.51.DFC	H376.IIIB.51	16 pcw	M	stage2	0.277163	0	0	0.294271	0.122647	0.0265315	0	0.0850758	0	0	0.0765351	0.117776	0	0	0	0	0.16	0.060522	1.07185
H376.IIIB.51.OFC	H376.IIIB.51	16 pcw	M	stage2	0.238974	0	0	0.382877	0.0524887	0.00983247	0	0.0659181	0	0	0.082685	0.167224	0	0	0	0	0.16	0.0617697	1.07137
H376.IIIB.51.ITC	H376.IIIB.51	16 pcw	M	stage2	0.165223	0	0.185585	0.113738	0.0565623	0	0	0.0739971	0	0	0.118496	0.208454	0	0	0	0.0779446	0.16	0.0602169	1.07245
H376.IIIB.51.HIP	H376.IIIB.51	16 pcw	M	stage2	0.0660846	0	0.0443538	0.402194	0	0	0	0.170798	0	0	0.095757	0.143242	0	0	0	0.0775704	0.22	0.0400091	1.07345
H376.IIIB.51.VFC	H376.IIIB.51	16 pcw	M	stage2	0.266202	0	0.0624308	0.180366	0.165747	0	0	0.0382758	0	0	0.119679	0.144359	0	0	0	0.0229413	0.16	0.060864	1.07122
H376.IIIB.51.A1C	H376.IIIB.51	16 pcw	M	stage2	0.233317	0	0.188268	0.191667	0.0705882	0.00253423	0	0.058629	0	0	0.102589	0.131924	0	0	0	0.0204851	0.16	0.059341	1.06352
H376.IIIB.51.V1C	H376.IIIB.51	16 pcw	M	stage2	0.2185	0	0	0.326033	0.0949126	0.0328217	0	0.0626373	0	0	0.122414	0.142681	0	0	0	0	0.22	0.0393762	1.08353
H376.IIIB.51.STR	H376.IIIB.51	16 pcw	M	stage2	0.13808	0	0.0934167	0.251619	0.05157	0.0331989	0	0.0194608	0	0.0363873	0.0812281	0.175998	0	0	0	0.119041	0.21	0.0437044	1.07833
H376.IIIB.51.M1C	H376.IIIB.51	16 pcw	M	stage2	0.275486	0	0	0.371974	0.0569133	0.0530016	0	0.0666056	0	0	0.0945735	0.0471152	0	0	0	0.0343309	0.1	0.0912722	1.05574
H376.IIIB.51.IPC	H376.IIIB.51	16 pcw	M	stage2	0.273569	0	0.04716	0.295302	0.0825581	0.00819177	0	0.0848575	0	0	0.0995483	0.0527898	0	0	0	0.0560233	0.16	0.0586372	1.06289
H376.IIIB.51.S1C	H376.IIIB.51	16 pcw	M	stage2	0.278367	0	0.0565119	0.255932	0.136134	0	0	0.0635318	0	0	0.0699709	0.126933	0	0	0	0.0126186	0.14	0.065749	1.06583
H376.IIIB.51.CBC	H376.IIIB.51	16 pcw	M	stage2	0.0513499	0	0.306693	0.205252	0.0256839	0	0	0	0	0	0.0631644	0.247009	0	0.0381682	0	0.0626798	0.23	0.0370062	1.09092
H376.IIIB.51.MD	H376.IIIB.51	16 pcw	M	stage2	0.28112	0	0	0.145568	0.0717012	0	0	0.0846802	0	0	0.0765625	0.124326	0	0	0	0.216042	0.16	0.0523169	1.06095
H376.IIIB.52.AMY	H376.IIIB.52	16 pcw	M	stage2	0.0755088	0	0.232787	0.117419	0.101137	0	0	0.0314063	0	0	0.113478	0.184596	0	0	0	0.143668	0.16	0.0508538	1.07109
H376.IIIB.52.STC	H376.IIIB.52	16 pcw	M	stage2	0.249833	0	0.303365	0.0482021	0.0628129	0.0167067	0	0.0274357	0	0	0.095186	0.14789	0	0	0	0.0485682	0.16	0.0512689	1.0664
H376.IIIB.52.MFC	H376.IIIB.52	16 pcw	M	stage2	0.208021	0	0	0.155392	0.19377	0	0	0.0193716	0	0	0.101288	0.130478	0	0	0	0.19168	0.22	0.0409554	1.07354
H376.IIIB.52.DFC	H376.IIIB.52	16 pcw	M	stage2	0.29612	0	0	0.231529	0.0783362	0.0432754	0	0.0691791	0	0	0.113692	0.050682	0	0	0	0.117186	0.12	0.077688	1.05518
H376.IIIB.52.OFC	H376.IIIB.52	16 pcw	M	stage2	0.280233	0	0.141349	0.0370755	0.211341	0	0	0	0	0	0.108946	0.03583	0.0002	0	0	0.185047	0.14	0.0690443	1.05617
H376.IIIB.52.ITC	H376.IIIB.52	16 pcw	M	stage2	0.248119	0	0.131362	0.108909	0.164069	0	0	0.0853912	0	0	0.0993166	0.0760358	0	0	0	0.0867972	0.14	0.0658249	1.05872
H376.IIIB.52.HIP	H376.IIIB.52	16 pcw	M	stage2	0.0444067	0	0.267688	0.0723661	0	0	0	0.0315341	0	0	0.163906	0.0872146	0	0	0	0.332885	0.71	-0.0082	1.08323
H376.IIIB.52.VFC	H376.IIIB.52	16 pcw	M	stage2	0.346756	0	0.0670458	0.265473	0	0	0	0.0214784	0.0178009	0	0.0651259	0.154113	0	0	0	0.0622066	0.14	0.0664415	1.06195
H376.IIIB.52.A1C	H376.IIIB.52	16 pcw	M	stage2	0.225549	0	0.271894	0.045292	0.147019	0	0	0.0669021	0	0	0.1022	0.0787247	0	0	0	0.0624185	0.14	0.0651178	1.05742
H376.IIIB.52.V1C	H376.IIIB.52	16 pcw	M	stage2	0.290746	0	0.0547596	0.255517	0.103422	0.00889679	0	0.047594	0	0	0.0782207	0.145504	0	0	0	0.0153398	0.14	0.0705121	1.06415
H376.IIIB.52.STR	H376.IIIB.52	16 pcw	M	stage2	0.0897189	0	0.0804851	0.346606	0.00960397	0.0283664	0	0	0	0.0306971	0.10001	0.133815	0	0	0	0.180698	0.16	0.053026	1.06787
H376.IIIB.52.M1C	H376.IIIB.52	16 pcw	M	stage2	0.261796	0	0.0645624	0.223882	0.124809	0.012465	0	0.0170475	0	0	0.105422	0.130166	0	0	0	0.0598508	0.14	0.0656427	1.06446
H376.IIIB.52.IPC	H376.IIIB.52	16 pcw	M	stage2	0.221289	0	0.329699	0.0913136	0.113771	0	0	0.0916636	0	0	0.0654406	0.0776034	0	0	0	0.00921937	0.14	0.0749674	1.05496
H376.IIIB.52.S1C	H376.IIIB.52	16 pcw	M	stage2	0.261796	0	0.0645624	0.223882	0.124809	0.012465	0	0.0170475	0	0	0.105422	0.130166	0	0	0	0.0598508	0.14	0.0656427	1.06446
H376.IIIB.52.CBC	H376.IIIB.52	16 pcw	M	stage2	0.0801179	0	0.14591	0.1012	0.211169	0	0	0	0	0	0.0962927	0.235964	0	0	0	0.129346	0.22	0.0399475	1.09156
H376.IIIB.52.MD	H376.IIIB.52	16 pcw	M	stage2	0.0611777	0	0.253597	0	0.189566	0	0.0120258	0.0445329	0	0	0.171036	0.0786064	0	0	0	0.189458	0.16	0.0493218	1.06611
H376.IIIB.53.AMY	H376.IIIB.53	17 pcw	F	stage2	0.0752409	0	0.404618	0.00597797	0.086617	0	0	0.0217522	0	0	0.109043	0.249786	0	0	0	0.0469647	0.32	0.0215599	1.09736
H376.IIIB.53.STC	H376.IIIB.53	17 pcw	F	stage2	0.180107	0	0.483091	0	0.065537	0	0.0013167	0.0255041	0	0	0.0936714	0.10395	0	0	0	0.0468228	0.15	0.062369	1.05662
H376.IIIB.53.MFC	H376.IIIB.53	17 pcw	F	stage2	0.303028	0	0.231864	0.100588	0.100936	0	0	0.0588324	0	0	0.0744642	0.0572603	0	0	0	0.0730273	0.14	0.0686352	1.0549
H376.IIIB.53.DFC	H376.IIIB.53	17 pcw	F	stage2	0.270269	0	0.259111	0	0.16803	0	0	0.0207649	0	0	0.139253	0.0829646	0	0	0	0.0596069	0.16	0.0495985	1.06768
H376.IIIB.53.OFC	H376.IIIB.53	17 pcw	F	stage2	0.129907	0	0.311076	0	0.150666	0	0	0.0428564	0	0	0.152764	0.0810885	0	0	0	0.131643	0.16	0.049999	1.0625
H376.IIIB.53.ITC	H376.IIIB.53	17 pcw	F	stage2	0.244811	0	0	0.166817	0.158665	0	0	0.0907273	0	0	0.148504	0.0955524	0	0	0	0.0949243	0.16	0.0525278	1.0697
H376.IIIB.53.HIP	H376.IIIB.53	17 pcw	F	stage2	0.121159	0	0.107282	0.0930603	0.211125	0	0	0.0493221	0	0	0.10366	0.198467	0	0	0	0.115923	0.25	0.0362212	1.08635
H376.IIIB.53.VFC	H376.IIIB.53	17 pcw	F	stage2	0.242327	0	0.375094	0	0.124385	0	0	0.022757	0	0	0.11153	0.0805103	0	0	0	0.0433968	0.14	0.0691973	1.05649
H376.IIIB.53.A1C	H376.IIIB.53	17 pcw	F	stage2	0.162538	0	0.43022	0	0.111423	0	0	0.0420732	0	0	0.102987	0.0583958	0	0	0	0.0923633	0.15	0.0626491	1.05364
H376.IIIB.53.V1C	H376.IIIB.53	17 pcw	F	stage2	0.246767	0	0.376785	0.0551824	0.0448519	0.0362713	0	0.0431917	0	0	0.112405	0.0840322	0	0	0	0.0005	0.16	0.0618567	1.0611
H376.IIIB.53.STR	H376.IIIB.53	17 pcw	F	stage2	0.0930819	0	0.238424	0.0826289	0.121273	0.0104297	0	0.0436281	0	0	0.120964	0.125743	0	0	0	0.163827	0.19	0.0471108	1.06499
H376.IIIB.53.M1C	H376.IIIB.53	17 pcw	F	stage2	0.188531	0	0.490456	0	0.0374472	0.00310708	0	0.0618872	0	0	0.0783009	0.0487743	0	0	0	0.0914959	0.12	0.0800903	1.0453
H376.IIIB.53.IPC	H376.IIIB.53	17 pcw	F	stage2	0.250538	0	0.383423	0.0915532	0.0408167	0.0225765	0	0.0418245	0	0	0.0789488	0.0381902	0	0	0	0.0521294	0.12	0.0841921	1.04828
H376.IIIB.53.S1C	H376.IIIB.53	17 pcw	F	stage2	0.188531	0	0.490456	0	0.0374472	0.00310708	0	0.0618872	0	0	0.0783009	0.0487743	0	0	0	0.0914959	0.12	0.0800903	1.0453
H376.IIIB.53.CBC	H376.IIIB.53	17 pcw	F	stage2	0.101334	0	0	0.18442	0.117153	0	0	0	0	0.019265	0.0171118	0.333164	0	0	0	0.227552	0.23	0.037184	1.11406
H376.IIIB.53.MD	H376.IIIB.53	17 pcw	F	stage2	0	0	0.345836	0	0.0686465	0	0.0722902	0.00668024	0	0	0.128687	0.12513	0	0	0	0.252731	0.19	0.047621	1.0647
H376.IV.53.AMY	H376.IV.53	19 pcw	F	stage2	0.0538166	0	0.199427	0.167314	0.0381058	0.0895049	0	0.029143	0	0	0.152046	0.120114	0	0	0	0.150528	0.25	0.0360369	1.07676
H376.IV.53.STC	H376.IV.53	19 pcw	F	stage2	0.126993	0	0.498435	0	0.0812887	0	0	0.051102	0	0	0.0700979	0.0900758	0	0	0	0.0820076	0.14	0.0650504	1.05187
H376.IV.53.MFC	H376.IV.53	19 pcw	F	stage2	0.250074	0	0.190696	0.111752	0.109885	0	0	0.0492456	0	0	0.105607	0.0826741	0	0	0	0.100067	0.22	0.0402776	1.06511
H376.IV.53.DFC	H376.IV.53	19 pcw	F	stage2	0.328717	0	0.088021	0.105009	0.149721	0	0	0.028557	0	0	0.118951	0.110929	0	0	0	0.0700939	0.19	0.0449604	1.07163
H376.IV.53.OFC	H376.IV.53	19 pcw	F	stage2	0.130594	0	0.427194	0	0.146212	0	0	0.0255753	0	0	0.0812093	0.0659637	0	0	0	0.123252	0.16	0.0584117	1.05467
H376.IV.53.ITC	H376.IV.53	19 pcw	F	stage2	0.283264	0	0.0843612	0	0.14057	0	0	0.0428489	0	0	0.132175	0.23621	0	0	0	0.0805707	0.27	0.0329736	1.09888
H376.IV.53.HIP	H376.IV.53	19 pcw	F	stage2	0.0441439	0	0.247165	0.128441	0.116323	0	0	0.117458	0	0	0.0829512	0.159085	0	0	0	0.104433	0.22	0.0404493	1.07002
H376.IV.53.VFC	H376.IV.53	19 pcw	F	stage2	0.172432	0	0.500965	0	0.0499341	0	0	0.0459854	0	0	0.0817368	0.079061	0	0	0	0.069886	0.14	0.0703245	1.05035
H376.IV.53.A1C	H376.IV.53	19 pcw	F	stage2	0.125485	0	0.60104	0	0.0142898	0	0.0057721	0.0547936	0	0	0.062262	0.0750897	0	0	0	0.0612682	0.14	0.0729902	1.04876
H376.IV.53.V1C	H376.IV.53	19 pcw	F	stage2	0.202925	0	0.374804	0.121092	0.0274059	0	0	0.118716	0	0	0.0397548	0.0726623	0	0	0	0.0426393	0.14	0.0697378	1.0519
H376.IV.53.STR	H376.IV.53	19 pcw	F	stage2	0	0	0.314766	0.105962	0	0	0.0594638	0	0	0	0.174059	0.184978	0	0	0	0.160771	0.29	0.0260287	1.08981
H376.IV.53.M1C	H376.IV.53	19 pcw	F	stage2	0.222926	0	0.428022	0.0654343	0.020692	0.00175887	0.00925796	0.0627432	0	0	0.0701345	0.0341629	0	0	0	0.0848694	0.13	0.0762019	1.04773
H376.IV.53.IPC	H376.IV.53	19 pcw	F	stage2	0.130245	0	0.440949	0	0.00294327	0	0.0134844	0.109574	0	0	0.095067	0.0561149	0	0	0	0.151623	0.14	0.0653186	1.04673
H376.IV.53.S1C	H376.IV.53	19 pcw	F	stage2	0.222926	0	0.428022	0.0654343	0.020692	0.00175887	0.00925796	0.0627432	0	0	0.0701345	0.0341629	0	0	0	0.0848694	0.13	0.0762019	1.04773
H376.IV.53.CBC	H376.IV.53	19 pcw	F	stage2	0	0	0.7118	0	0.0264414	0	0.0269121	0.00914804	0	0	0.0340581	0.069368	0	0	0	0.122273	0.08	0.0957445	1.03861
H376.IV.53.MD	H376.IV.53	19 pcw	F	stage2	0	0	0.424355	0	0.0199946	0	0.063761	0.0127017	0	0	0.132249	0.133766	0	0	0	0.213173	0.16	0.0522499	1.06217
H376.IV.54.AMY	H376.IV.54	21 pcw	M	stage2	0.174444	0	0.164473	0.0452244	0.104072	0	0	0.0692274	0	0	0.122039	0.176346	0	0	0	0.144175	0.16	0.0585909	1.06843
H376.IV.54.STC	H376.IV.54	21 pcw	M	stage2	0.172345	0	0.451785	0.0407748	0.0381845	0	0.00930404	0.0448257	0	0	0.0617544	0.0960014	0	0.00150597	0	0.0835188	0.12	0.0787567	1.04655
H376.IV.54.MFC	H376.IV.54	21 pcw	M	stage2	0.254384	0	0.350785	0.057901	0.0178111	0.0134397	0	0.0729801	0	0	0.0570489	0.0772124	0	0	0	0.0984375	0.11	0.0878741	1.04286
H376.IV.54.DFC	H376.IV.54	21 pcw	M	stage2	0.193133	0	0.442376	0.0396412	0.0183199	0	0.00343994	0.0617829	0	0	0.075766	0.105851	0	0	0	0.0596905	0.14	0.0733241	1.04983
H376.IV.54.OFC	H376.IV.54	21 pcw	M	stage2	0.227677	0	0.328134	0.0843858	0.0470323	0.0204965	0	0.0422181	0	0	0.0840562	0.0649731	0	0	0	0.101027	0.12	0.0791967	1.04694
H376.IV.54.ITC	H376.IV.54	21 pcw	M	stage2	0.261562	0	0.30856	0.093963	0.081742	0	0	0.0315379	0	0	0.0937784	0.0605247	0	0	0	0.0683324	0.09	0.0924115	1.04431
H376.IV.54.HIP	H376.IV.54	21 pcw	M	stage2	0.0478894	0	0.215283	0.0823967	0.107006	0	0	0.109722	0	0	0.127067	0.182544	0	0	0	0.128091	0.16	0.0535442	1.07218
H376.IV.54.VFC	H376.IV.54	21 pcw	M	stage2	0.182727	0	0.041452	0.106891	0.112874	0	0	0.0704303	0	0	0.135374	0.197113	0	0	0	0.153139	0.19	0.0450195	1.08253
H376.IV.54.A1C	H376.IV.54	21 pcw	M	stage2	0.200434	0	0.333362	0	0.101181	0	0	0.0526496	0	0	0.0804174	0.176953	0	0	0	0.0550021	0.14	0.073615	1.05904
H376.IV.54.V1C	H376.IV.54	21 pcw	M	stage2	0.243746	0	0.522643	0.0353183	0.0053729	0.0220548	0	0.00566091	0	0	0.0761267	0.0621601	0	0	0	0.0269181	0.12	0.083644	1.04975
H376.IV.54.STR	H376.IV.54	21 pcw	M	stage2	0.101458	0	0.22289	0.200463	0.0137491	0.046443	0	0	0	0.0327427	0.130948	0.139563	0	0	0	0.111744	0.16	0.0610031	1.06792
H376.IV.54.M1C	H376.IV.54	21 pcw	M	stage2	0.165376	0	0.327041	0.00173361	0.118733	0	0	0.0318798	0	0	0.152706	0.0986279	0	0	0	0.103902	0.16	0.0597106	1.06021
H376.IV.54.IPC	H376.IV.54	21 pcw	M	stage2	0.280621	0	0.241174	0.0952006	0.0687664	0.0197066	0	0.0296603	0	0	0.095518	0.0847871	0	0	0	0.0845665	0.14	0.0652264	1.05587
H376.IV.54.S1C	H376.IV.54	21 pcw	M	stage2	0.275112	0	0.269116	0.0689667	0.118785	0	0	0.0279229	0	0	0.104358	0.0657472	0	0	0	0.0699917	0.12	0.0793809	1.05117
H376.IV.54.CBC	H376.IV.54	21 pcw	M	stage2	0.0926748	0	0	0.186157	0.0664298	0	0.0325989	0.00591073	0	0	0.135392	0.311221	0	0	0.0007	0.168894	0.22	0.0414558	1.1198
H376.IV.54.MD	H376.IV.54	21 pcw	M	stage2	0.147172	0	0.253722	0	0.166704	0	0	0.0353605	0	0	0.113365	0.151214	0	0	0	0.132463	0.14	0.0644356	1.06249
H376.IV.50.AMY	H376.IV.50	24 pcw	M	stage2	0.0674717	0	0.15887	0.0242804	0.0287764	0	0.00576881	0.00591274	0	0	0.205269	0.203213	0	0	0	0.300437	0.37	0.0160477	1.11307
H376.IV.50.STC	H376.IV.50	24 pcw	M	stage2	0.123369	0	0.516506	0.0511409	0.0222112	0	0	0.0698587	0	0	0.028427	0.110967	0	0.010636	0	0.0668837	0.14	0.0647789	1.05231
H376.IV.50.MFC	H376.IV.50	24 pcw	M	stage2	0.264947	0	0.051223	0.159025	0.113873	0.00965554	0	0.0269648	0	0	0.155059	0.0956702	0	0	0	0.123583	0.19	0.0483499	1.06864
H376.IV.50.DFC	H376.IV.50	24 pcw	M	stage2	0.238511	0	0.175018	0.115907	0.139222	0	0	0.0208728	0	0	0.136369	0.120053	0	0	0	0.0540474	0.14	0.0639893	1.06381
H376.IV.50.OFC	H376.IV.50	24 pcw	M	stage2	0.243098	0	0.113955	0.0882251	0.118178	0.0006	0	0.0430981	0	0	0.155844	0.0929396	0	0	0	0.144084	0.16	0.0502269	1.06541
H376.IV.50.ITC	H376.IV.50	24 pcw	M	stage2	0.192895	0	0.352846	0.163387	0.0331953	0	0	0.030372	0	0	0.0588724	0.11253	0	0.00640198	0	0.0495007	0.12	0.0848694	1.04732
H376.IV.50.HIP	H376.IV.50	24 pcw	M	stage2	0.0971999	0	0.142671	0.149251	0.132423	0	0	0.0385714	0	0	0.0818997	0.20001	0	0	0	0.157974	0.16	0.0524999	1.07242
H376.IV.50.VFC	H376.IV.50	24 pcw	M	stage2	0.222175	0	0.314384	0.0552314	0.045712	0.029035	0	0.0260577	0	0	0.102426	0.131496	0	0	0	0.073483	0.14	0.0644595	1.05861
H376.IV.50.A1C	H376.IV.50	24 pcw	M	stage2	0.151097	0	0.421963	0.0897031	0	0	0	0.0901792	0	0	0.0360202	0.133814	0	0.0102293	0	0.0669942	0.12	0.0794764	1.04738
H376.IV.50.V1C	H376.IV.50	24 pcw	M	stage2	0.115538	0	0.456714	0.0771915	0.00842393	0	0	0.0642956	0	0	0.105733	0.12884	0	0	0	0.0432642	0.14	0.065392	1.05536
H376.IV.50.STR	H376.IV.50	24 pcw	M	stage2	0.0494548	0	0.248663	0.148745	0.071185	0	0	0	0	0	0.0970454	0.224739	0	0	0	0.160168	0.16	0.0591216	1.07348
H376.IV.50.M1C	H376.IV.50	24 pcw	M	stage2	0.28579	0	0.140385	0.149906	0.00839196	0.0410666	0	0.0850615	0	0	0.0658076	0.129377	0	0	0	0.0942145	0.14	0.0749571	1.05341
H376.IV.50.IPC	H376.IV.50	24 pcw	M	stage2	0.251166	0	0.227896	0.200496	0.0198578	0	0	0.0372696	0	0	0.0917069	0.0881203	0	0	0	0.0834872	0.14	0.0755725	1.04927
H376.IV.50.S1C	H376.IV.50	24 pcw	M	stage2	0.199219	0	0.362513	0.0721177	0.0561322	0	0	0.080637	0	0	0.0591119	0.115263	0	0	0	0.0550054	0.12	0.0823142	1.04747
H376.IV.50.CBC	H376.IV.50	24 pcw	M	stage2	0.116066	0	0	0.126611	0.134574	0	0	0	0	0.0202893	0.0161274	0.39336	0	0	0	0.192972	0.14	0.0661992	1.12176
H376.IV.50.MD	H376.IV.50	24 pcw	M	stage2	0.166305	0	0.0247465	0.0794218	0.16218	0	0	0.0168309	0	0.0111727	0.124007	0.191288	0	0	0	0.224048	0.16	0.051193	1.08223
H376.V.53.AMY	H376.V.53	37 pcw	M	stage3	0.0796623	0	0.459283	0.0878361	0.099017	0	0	0	0	0.00815645	0.0614921	0.172812	0	0	0	0.0317417	0.06	0.109548	1.044
H376.V.53.STC	H376.V.53	37 pcw	M	stage3	0.163172	0	0.418612	0.0883906	0.0456591	0	0.00764876	0.00272369	0	0.00362593	0.0459047	0.151008	0	0.0155493	0	0.0577061	0.03	0.127697	1.03338
H376.V.53.MFC	H376.V.53	37 pcw	M	stage3	0.0993366	0	0.285513	0.124532	0.0676375	0	0.0617752	0	0	0	0.0595895	0.222392	0	0	0	0.0792239	0.09	0.0916799	1.05764
H376.V.53.DFC	H376.V.53	37 pcw	M	stage3	0.14077	0	0.348985	0.112164	0.0278598	0	0.0149738	0	0	0	0.0693975	0.167655	0	0	0	0.118194	0.06	0.113256	1.03793
H376.V.53.OFC	H376.V.53	37 pcw	M	stage3	0.163213	0	0.277368	0.0608216	0.0539857	0	0	0.00384827	0	0	0.0955084	0.191848	0	0	0	0.153407	0.08	0.095296	1.05092
H376.V.53.ITC	H376.V.53	37 pcw	M	stage3	0.210368	0	0.227538	0.125144	0.0245217	0	0	0.0419815	0	0	0.06423	0.175448	0	0	0	0.13077	0.11	0.0893851	1.04791
H376.V.53.HIP	H376.V.53	37 pcw	M	stage3	0.154376	0	0.387936	0.0431869	0	0.0585569	0	0	0	0	0.0774007	0.139308	0	0	0	0.139236	0.29	0.0249149	1.07088
H376.V.53.VFC	H376.V.53	37 pcw	M	stage3	0.208723	0	0.334687	0.0531316	0.0491883	0	0.00146591	0.00214243	0	0	0.0889217	0.186878	0	0.0123763	0	0.0624865	0.07	0.101484	1.05041
H376.V.53.A1C	H376.V.53	37 pcw	M	stage3	0.0974931	0	0.517969	0.0172061	0.0770483	0	0	0.00939156	0	0	0.0350397	0.144711	0	0.0154572	0	0.0856842	0.03	0.150005	1.0225
H376.V.53.V1C	H376.V.53	37 pcw	M	stage3	0.104246	0	0.509844	0.114796	0.0212472	0	0.0421027	0	0	0	0.0164575	0.142968	0	0.0242478	0	0.0240903	0.03	0.159239	1.02161
H376.V.53.STR	H376.V.53	37 pcw	M	stage3	0.0872398	0	0.45198	0.00724958	0.0759423	0	0.0210493	0.00273739	0	0.0105653	0.0864922	0.172968	0	0	0	0.0837762	0.12	0.0773899	1.0569
H376.V.53.M1C	H376.V.53	37 pcw	M	stage3	0.0666228	0	0.320277	0.145808	0.0608934	0	0.0497757	0	0	0.0204172	0.0502563	0.215414	0	0	0	0.0705349	0.07	0.099298	1.05453
H376.V.53.IPC	H376.V.53	37 pcw	M	stage3	0.169052	0	0.316358	0.169406	0	0	0	0	0	0	0.0358225	0.155018	0	0.0220675	0	0.132276	0.04	0.123714	1.03253
H376.V.53.S1C	H376.V.53	37 pcw	M	stage3	0.0871382	0	0.456077	0.0908196	0.0360822	0	0.0342879	0	0	0.00204531	0.0220023	0.171757	0	0.028643	0	0.0711483	0.03	0.144684	1.02822
H376.V.53.CBC	H376.V.53	37 pcw	M	stage3	0.160601	0	0	0.0961149	0.140999	0	0	0.0219342	0	0.0001	0.136214	0.303278	0	0	0.00994652	0.130773	0.29	0.0277029	1.12505
H376.V.53.MD	H376.V.53	37 pcw	M	stage3	0	0	0.501534	0	0.055049	0	0.07319	0	0	0	0.0779406	0.213134	0	0.0173456	0	0.0618074	0.22	0.0406447	1.08089
H376.VI.50.AMY	H376.VI.50	4 mos	M	stage4	0.10216	0	0.468372	0.0796007	0.0753673	0	0.0350072	0	0	0.00416351	0.0433138	0.136401	0	0.00792337	0	0.0476908	0.03	0.156023	1.02173
H376.VI.50.STC	H376.VI.50	4 mos	M	stage4	0.18039	0	0.418793	0.0787944	0.0769721	0	0.00441263	0	0	0.00953973	0.029046	0.163894	0	0.014672	0	0.0234863	0.02	0.241068	0.988564
H376.VI.50.MFC	H376.VI.50	4 mos	M	stage4	0.188253	0	0.414455	0.0773124	0.0845463	0	0	0	0	0.00206681	0.0367766	0.131231	0	0.00986538	0	0.0554929	0.02	0.23711	0.987775
H376.VI.50.DFC	H376.VI.50	4 mos	M	stage4	0.132091	0	0.548986	0.0603755	0.127101	0	0	0.00682707	0.020165	0	0	0.0873987	0	0.0170569	0	0	0.02	0.221791	0.997463
H376.VI.50.OFC	H376.VI.50	4 mos	M	stage4	0.111146	0	0.558106	0.0658911	0.137003	0	0	0.00482708	0.00212915	0	0	0.0944859	0	0.0208814	0.00552987	0	0.02	0.217479	0.999628
H376.VI.50.ITC	H376.VI.50	4 mos	M	stage4	0.156557	0	0.419299	0.0854391	0.0780669	0	0	0	0	0.0194386	0.0418265	0.134423	0	0.00775462	0	0.0571948	0.02	0.233433	0.989563
H376.VI.50.HIP	H376.VI.50	4 mos	M	stage4	0.131054	0	0.455233	0.0732866	0.105554	0	0	0	0	0.00534424	0.030403	0.185599	0	0.00707215	0	0.00645355	0.03	0.16236	1.02391
H376.VI.50.VFC	H376.VI.50	4 mos	M	stage4	0.119841	0	0.559459	0.0666962	0.122272	0	0	0.00530285	0.0116301	0	0	0.094992	0	0.0171542	0.00265253	0	0.03	0.208399	1.00297
H376.VI.50.A1C	H376.VI.50	4 mos	M	stage4	0.0756641	0	0.624162	0.0362354	0.135042	0	0	0.00266114	0.0252785	0	0.00490603	0.0839585	0	0.00881674	0	0.0032754	0.03	0.206397	1.00358
H376.VI.50.V1C	H376.VI.50	4 mos	M	stage4	0.163491	0	0.403372	0.140565	0.0915723	0	0	0	0	0	0.0470297	0.116136	0	0.00464946	0	0.0331855	0.03	0.189576	1.00785
H376.VI.50.STR	H376.VI.50	4 mos	M	stage4	0.0771631	0	0.509001	0	0.0898954	0	0.0170414	0	0	0	0.0920848	0.123881	0	0	0	0.0909328	0.12	0.079993	1.04952
H376.VI.50.M1C	H376.VI.50	4 mos	M	stage4	0.0763247	0	0.631207	0.040527	0.124894	0	0	0	0.0322703	0	0.0005	0.0844564	0	0.0095877	0	0.0002	0.03	0.210508	1.00193
H376.VI.50.IPC	H376.VI.50	4 mos	M	stage4	0.0867538	0	0.613944	0.0433824	0.126753	0	0	0.001	0.0144695	0	0.00458935	0.0970322	0	0.0120886	0	0	0.02	0.226309	0.995171
H376.VI.50.S1C	H376.VI.50	4 mos	M	stage4	0.085093	0	0.618865	0.030191	0.123468	0	0	0.00874934	0.0262799	0	0.00726191	0.0864534	0	0.013638	0	0	0.03	0.208286	1.00263
H376.VI.50.CBC	H376.VI.50	4 mos	M	stage4	0.0007	0	0.29825	0.0258297	0.181057	0	0	0.0003	0	0	0.0792485	0.286109	0	0.00693865	0.02141	0.100188	0.22	0.0432314	1.10163
H376.VI.50.MD	H376.VI.50	4 mos	M	stage4	0	0	0.609153	0	0.0941036	0	0.0156114	0	0.0155825	0	0.0678076	0.133383	0	0.0002	0	0.0641899	0.03	0.1306	1.03158
H376.VI.51.AMY	H376.VI.51	4 mos	M	stage4	0	0	0.543781	0.0700285	0.0611185	0	0.0227431	0	0	0.00324457	0.0445094	0.155563	0	0	0	0.099012	0.03	0.140124	1.02613
H376.VI.51.STC	H376.VI.51	4 mos	M	stage4	0.108011	0	0.476193	0.0159714	0.0616744	0	0.0098743	0	0	0	0.0459393	0.152658	0	0.0102901	0	0.119388	0.03	0.182395	1.00906
H376.VI.51.MFC	H376.VI.51	4 mos	M	stage4	0.103603	0	0.518941	0.0596418	0.0750271	0	0.0115122	0	0	0.00111037	0.0323864	0.156864	0	0.00504819	0	0.0358664	0.03	0.204277	1.00241
H376.VI.51.DFC	H376.VI.51	4 mos	M	stage4	0.10928	0	0.480577	0.00708624	0.0668673	0	0	0	0	0.00114358	0.0409756	0.176792	0	0.0195814	0	0.097697	0.03	0.16746	1.01829
H376.VI.51.OFC	H376.VI.51	4 mos	M	stage4	0.0488951	0	0.498657	0.0549171	0.0537602	0	0.0125142	0	0	0.00458559	0.0933692	0.159565	0	0	0	0.0737368	0.03	0.16829	1.01761
H376.VI.51.ITC	H376.VI.51	4 mos	M	stage4	0.113525	0	0.481756	0.052869	0.0504775	0	0	0	0	0.0252638	0.0232003	0.143164	0	0.0139647	0	0.0957797	0.03	0.19335	1.0052
H376.VI.51.HIP	H376.VI.51	4 mos	M	stage4	0.0242114	0	0.490078	0	0.0463455	0	0.0144612	0	0	0	0.0921559	0.226391	0	0	0	0.106357	0.03	0.141977	1.03663
H376.VI.51.VFC	H376.VI.51	4 mos	M	stage4	0.0970179	0	0.439313	0.0227879	0.0376335	0	0.0319235	0	0	0	0.0573138	0.184483	0	0.0168792	0	0.112649	0.03	0.162375	1.02139
H376.VI.51.A1C	H376.VI.51	4 mos	M	stage4	0.0517548	0	0.522576	0.0160647	0.0608199	0	0.00362084	0	0	0.00528012	0.0447568	0.174096	0	0.0162647	0	0.104766	0.03	0.175182	1.0146
H376.VI.51.V1C	H376.VI.51	4 mos	M	stage4	0.126118	0	0.462847	0.0369566	0.0543705	0	0	0.00345603	0	0	0.0728506	0.130943	0	0	0	0.112457	0.03	0.193142	1.00333
H376.VI.51.STR	H376.VI.51	4 mos	M	stage4	0	0.0376271	0	0.0479814	0.0340542	0	0.0469513	0.0238844	0	0.0527758	0.147326	0.405681	0	0	0	0.203718	0.15	0.0624019	1.17747
H376.VI.51.M1C	H376.VI.51	4 mos	M	stage4	0.0297668	0	0.535385	0.0235755	0.0168257	0	0.0421346	0	0	0.0188322	0.0751767	0.169115	0	0.00634381	0	0.082845	0.03	0.186691	1.01142
H376.VI.51.IPC	H376.VI.51	4 mos	M	stage4	0.0859054	0	0.439518	0.0773035	0.0882968	0	0.0313545	0	0	0	0.0641523	0.168405	0	0	0	0.0450651	0.03	0.193229	1.00832
H376.VI.51.S1C	H376.VI.51	4 mos	M	stage4	0.0902307	0	0.489921	0.0891601	0.0589148	0	0.0203763	0	0	0.00447589	0.0540248	0.17052	0	0	0	0.0223765	0.03	0.197206	1.00675
H376.VI.51.CBC	H376.VI.51	4 mos	M	stage4	0.151147	0	0	0.150477	0.0370102	0.0294156	0	0.0268652	0	0.0006	0.188708	0.289591	0	0	0	0.126192	0.14	0.0671839	1.11025
H376.VI.51.MD	H376.VI.51	4 mos	M	stage4	0	0.0144231	0.0553775	0	0	0.0741474	0.0365618	0.00336487	0	0.0885906	0.11367	0.382874	0	0	0	0.23099	0.16	0.0518651	1.18112
H376.VI.52.AMY	H376.VI.52	4 mos	M	stage4	0.0938545	0	0.409843	0.0289339	0.124463	0	0	0.021359	0	0.0113736	0.0380709	0.166583	0	0	0	0.105519	0.03	0.152427	1.02303
H376.VI.52.STC	H376.VI.52	4 mos	M	stage4	0.139399	0	0.458165	0.079101	0.122641	0	0	0	0	0.0104058	0.00971412	0.143587	0	0.0316877	0.00529971	0	0.03	0.184139	1.01478
H376.VI.52.MFC	H376.VI.52	4 mos	M	stage4	0.199372	0	0.398718	0.0539585	0.0963267	0	0.00735866	0	0	0	0.0338921	0.142572	0	0.0212508	0	0.0465515	0.03	0.166185	1.01923
H376.VI.52.DFC	H376.VI.52	4 mos	M	stage4	0.188482	0	0.416821	0.0786031	0.0796253	0	0.00725952	0	0	0.00236814	0.0331296	0.128216	0	0.00966952	0	0.0558249	0.03	0.169271	1.01567
H376.VI.52.OFC	H376.VI.52	4 mos	M	stage4	0.119108	0	0.469655	0.0739281	0.142751	0	0	0	0	0	0.0005	0.149395	0	0.0222054	0	0.0224231	0.03	0.165909	1.02144
H376.VI.52.ITC	H376.VI.52	4 mos	M	stage4	0.176551	0	0.377232	0.11081	0.0864894	0	0.0140245	0	0	0.0145335	0.0383913	0.123951	0	0.0111324	0	0.0468853	0.03	0.166558	1.0179
H376.VI.52.HIP	H376.VI.52	4 mos	M	stage4	0.0591605	0	0.433999	0.0265402	0.0866864	0	0.0126392	0	0	0	0.0360268	0.203668	0	0.00377098	0	0.137509	0.03	0.154526	1.02441
H376.VI.52.VFC	H376.VI.52	4 mos	M	stage4	0.176928	0	0.360286	0.0949076	0.0756669	0	0.0115454	0	0	0.0226955	0.0337649	0.149717	0	0.0145682	0	0.0599198	0.03	0.15772	1.02276
H376.VI.52.A1C	H376.VI.52	4 mos	M	stage4	0.047017	0	0.594264	0.0676322	0.0589487	0	0.00582996	0	0	0	0.0335763	0.167606	0	0.0251256	0	0	0.03	0.191365	1.01073
H376.VI.52.V1C	H376.VI.52	4 mos	M	stage4	0.149206	0	0.520481	0.045739	0.0672872	0	0	0.0175565	0	0.0128296	0.0236186	0.128292	0	0.0145224	0	0.0204684	0.03	0.184687	1.01039
H376.VI.52.STR	H376.VI.52	4 mos	M	stage4	0.0778264	0	0.507594	0	0.00732581	0.0337233	0.0106367	0	0	0	0.0920377	0.15641	0	0	0	0.114446	0.03	0.136453	1.02931
H376.VI.52.M1C	H376.VI.52	4 mos	M	stage4	0.150274	0	0.481852	0.0287853	0.0982048	0	0.0264799	0	0	0.00215051	0.0243455	0.147052	0	0.024348	0	0.0165073	0.03	0.135559	1.03377
H376.VI.52.IPC	H376.VI.52	4 mos	M	stage4	0.193982	0	0.397069	0.0738501	0.10859	0	0.00940805	0	0	0	0.0294046	0.144138	0	0.0166158	0	0.0269431	0.03	0.155584	1.02448
H376.VI.52.S1C	H376.VI.52	4 mos	M	stage4	0.197615	0	0.398333	0.081216	0.0846444	0	0.00257652	0.00334615	0	0.0178534	0.028727	0.126862	0	0.0120038	0	0.0468224	0.03	0.153468	1.02313
H376.VI.52.CBC	H376.VI.52	4 mos	M	stage4	0.0145086	0	0.27684	0.0244488	0.166817	0	0.00735382	0.0367745	0	0	0.0761897	0.263609	0	0	0.0044995	0.128959	0.14	0.0719281	1.07817
H376.VI.52.MD	H376.VI.52	4 mos	M	stage4	0.0407043	0	0.428578	0	0.118882	0	0.0181697	0.00535318	0	0	0.0627339	0.166051	0	0	0	0.159527	0.05	0.115764	1.0372
H376.VII.51.AMY	H376.VII.51	10 mos	M	stage4	0.068547	0	0.551419	0.0526008	0.110654	0	0	0	0	0	0.0277157	0.147597	0	0.0135478	0	0.0279194	0.03	0.193139	1.00787
H376.VII.51.STC	H376.VII.51	10 mos	M	stage4	0.107259	0	0.561721	0.0751016	0.130401	0	0	0	0.0174808	0	0	0.081596	0	0.0243358	0.00210478	0	0.03	0.192737	1.01043
H376.VII.51.MFC	H376.VII.51	10 mos	M	stage4	0.129722	0	0.565235	0.0286814	0.1219	0	0	0.0113102	0.0275201	0	0	0.0836602	0	0.0319723	0	0	0.03	0.17284	1.01878
H376.VII.51.DFC	H376.VII.51	10 mos	M	stage4	0.226346	0	0.46329	0.0772987	0.117123	0	0	0.00850697	0	0.00232554	0.0254486	0.0744049	0	0.00525574	0	0	0.03	0.212285	1.00119
H376.VII.51.OFC	H376.VII.51	10 mos	M	stage4	0.202752	0	0.520032	0.048145	0.112209	0	0	0	0	0	0	0.0869123	0	0.0180156	0.0119339	0	0.02	0.229944	0.994012
H376.VII.51.ITC	H376.VII.51	10 mos	M	stage4	0.107417	0	0.564406	0.0715382	0.145473	0	0	0	0.00901715	0	0	0.0752382	0	0.0249168	0.00199294	0	0.03	0.191211	1.01186
H376.VII.51.HIP	H376.VII.51	10 mos	M	stage4	0.0296436	0	0.54664	0.0588816	0.0992382	0	0.0181138	0.00588993	0	0	0.0542622	0.13273	0	0.00292672	0	0.051674	0.02	0.217492	0.995867
H376.VII.51.VFC	H376.VII.51	10 mos	M	stage4	0.0858539	0	0.583493	0.0805852	0.12198	0	0	0.00189911	0.00110896	0	0.00961139	0.0944738	0	0.0159061	0.00508897	0	0.03	0.193566	1.00902
H376.VII.51.A1C	H376.VII.51	10 mos	M	stage4	0.0708662	0	0.615736	0.0528491	0.110668	0	0	0.00800795	0.0151178	0	0.00398696	0.105497	0	0.0172715	0	0	0.03	0.189594	1.01042
H376.VII.51.V1C	H376.VII.51	10 mos	M	stage4	0.180689	0	0.595466	0	0.102838	0	0	0	0	0.00476943	0.00720886	0.0859984	0	0.0181796	0.00485091	0	0.03	0.196141	1.00809
H376.VII.51.STR	H376.VII.51	10 mos	M	stage4	0.0554667	0	0.50766	0	0.101188	0	0	0.0177813	0	0.00938457	0.0776433	0.172048	0	0	0	0.058828	0.04	0.123573	1.03765
H376.VII.51.M1C	H376.VII.51	10 mos	M	stage4	0.083461	0	0.576914	0.063831	0.133294	0	0	0.00370109	0.00967664	0	0.0126782	0.100093	0	0.0163503	0	0	0.03	0.188787	1.01122
H376.VII.51.IPC	H376.VII.51	10 mos	M	stage4	0.0701464	0	0.631658	0.0171099	0.125337	0	0	0.00532283	0.034254	0	0	0.096377	0	0.0197947	0	0	0.03	0.188918	1.01133
H376.VII.51.S1C	H376.VII.51	10 mos	M	stage4	0.190916	0	0.551202	0	0.127453	0	0	0.0155148	0	0.0148952	0.0113039	0.0743948	0	0.0119812	0.0023392	0	0.03	0.211735	1.00158
H376.VII.51.CBC	H376.VII.51	10 mos	M	stage4	0.0164005	0	0.494297	0.0981331	0	0	0	0.046533	0	0	0.117249	0.175433	0	0	0.0221822	0.0297721	0.16	0.0561262	1.06728
H376.VII.51.MD	H376.VII.51	10 mos	M	stage4	0.0227438	0	0.601242	0	0.149386	0	0.00606157	0	0	0	0.0175828	0.114099	0	0.00295779	0	0.0859272	0.12	0.0842163	1.04836
H376.VIII.51.AMY	H376.VIII.51	1 yrs	F	stage4	0.118892	0	0.456104	0.138132	0.116382	0	0.0016179	0.00662363	0	0	0.0316355	0.1169	0	0.00299952	0	0.0107135	0.02	0.262613	0.978444
H376.VIII.51.STC	H376.VIII.51	1 yrs	F	stage4	0.169089	0	0.476568	0.122839	0.0900403	0	0	0	0	0.00146525	0.0161301	0.104434	0	0.0165082	0.00292615	0	0.02	0.215695	0.999085
H376.VIII.51.MFC	H376.VIII.51	1 yrs	F	stage4	0.0884863	0	0.550589	0.0661723	0.136866	0	0	0.0001	0	0	0.0211639	0.110746	0	0.0157123	0	0.0101915	0.02	0.242187	0.987931
H376.VIII.51.DFC	H376.VIII.51	1 yrs	F	stage4	0.126846	0	0.534906	0.0794182	0.128232	0	0	0	0	0	0.0212639	0.0911097	0	0.0160434	0.00218118	0	0.02	0.21782	0.998769
H376.VIII.51.OFC	H376.VIII.51	1 yrs	F	stage4	0.178488	0	0.360317	0.206137	0.0848547	0	0	0	0	0	0.0342781	0.120043	0	0.0103766	0	0.00550546	0.03	0.208913	1.00187
H376.VIII.51.ITC	H376.VIII.51	1 yrs	F	stage4	0.0843321	0	0.562103	0.0762209	0.125017	0	0	0	0	0	0.0110643	0.124654	0	0.0134245	0.00318425	0	0.02	0.250148	0.984772
H376.VIII.51.HIP	H376.VIII.51	1 yrs	F	stage4	0.0609402	0	0.529339	0.0888301	0.120369	0	0	0.00814363	0	0	0.0443212	0.115578	0	0.00302651	0	0.0294528	0.01	0.278509	0.970739
H376.VIII.51.VFC	H376.VIII.51	1 yrs	F	stage4	0.0892111	0	0.593922	0.0753869	0.119944	0	0	0	0	0	0.00518969	0.0828362	0	0.0209726	0.0125378	0	0.02	0.219411	0.998341
H376.VIII.51.A1C	H376.VIII.51	1 yrs	F	stage4	0.0929641	0	0.574687	0.0721779	0.133511	0	0	0	0	0	0.0316235	0.0858204	0	0.00595507	0.00326152	0	0.02	0.219682	0.997465
H376.VIII.51.V1C	H376.VIII.51	1 yrs	F	stage4	0.0513293	0	0.669752	0.0422229	0.123499	0	0	0.0050032	0	0.00576122	0	0.0658115	0	0.0222875	0.0143335	0	0.02	0.253882	0.983918
H376.VIII.51.STR	H376.VIII.51	1 yrs	F	stage4	0.23987	0	0.437567	0.0471967	0.00361457	0	0.03332	0	0	0	0.0685627	0.140057	0	0	0	0.0298119	0.05	0.11742	1.03806
H376.VIII.51.M1C	H376.VIII.51	1 yrs	F	stage4	0.10245	0	0.592493	0.0667813	0.0982277	0	0	0	0.0171495	0	0.0157483	0.0895712	0	0.0175795	0	0	0.02	0.214846	0.999492
H376.VIII.51.IPC	H376.VIII.51	1 yrs	F	stage4	0.114355	0	0.581735	0.055266	0.125448	0	0	0	0	0	0.0201712	0.0778936	0	0.0170074	0.00812282	0	0.02	0.235089	0.991333
H376.VIII.51.S1C	H376.VIII.51	1 yrs	F	stage4	0.085521	0	0.601226	0.068453	0.122606	0	0	0	0	0	0.0224461	0.0739862	0	0.0153868	0.0103749	0	0.02	0.222897	0.996402
H376.VIII.51.CBC	H376.VIII.51	1 yrs	F	stage4	0.0263243	0	0.325801	0.0257527	0.145154	0	0.0639912	0	0	0	0.0561969	0.210959	0	0	0.0005	0.145296	0.06	0.11291	1.04779
H376.VIII.51.MD	H376.VIII.51	1 yrs	F	stage4	0.0394129	0	0.531227	0	0.10213	0	0.0550595	0	0	0	0.0626974	0.147095	0	0.00737773	0	0.0550009	0.03	0.127087	1.03492
H376.VIII.53.AMY	H376.VIII.53	2 yrs	F	stage4	0	0	0.632922	0	0	0.0110524	0.218563	0	0.0134353	0.00434669	0.0149538	0.0816328	0	0	0	0.0230945	0.16	0.0514633	1.06815
H376.VIII.53.STC	H376.VIII.53	2 yrs	F	stage4	0	0	0.733617	0.0196494	0	0	0.0507571	0	0	0.0207318	0	0.129927	0	0.030557	0	0.0147609	0.03	0.184549	1.01194
H376.VIII.53.MFC	H376.VIII.53	2 yrs	F	stage4	0.118176	0	0.621132	0	0.0639107	0	0.0258681	0	0	0	0.0137175	0.130985	0	0.0169694	0.00924179	0	0.03	0.142719	1.02933
H376.VIII.53.DFC	H376.VIII.53	2 yrs	F	stage4	0.112939	0	0.660644	0	0.0241974	0	0	0	0	0	0.00792067	0.152208	0	0.0172652	0	0.024825	0.03	0.156485	1.02245
H376.VIII.53.OFC	H376.VIII.53	2 yrs	F	stage4	0.0827298	0	0.646811	0	0.0712476	0	0.0207123	0	0	0	0.0375135	0.130594	0	0.010392	0	0	0.06	0.110006	1.04219
H376.VIII.53.ITC	H376.VIII.53	2 yrs	F	stage4	0.0785261	0	0.68477	0.0251937	0	0	0.0240486	0	0	0.0311298	0	0.141704	0	0.0138426	0	0.0008	0.03	0.131058	1.03424
H376.VIII.53.HIP	H376.VIII.53	2 yrs	F	stage4	0	0	0.584624	0.0856812	0	0	0.100982	0	0.00710402	0	0.0001	0.149754	0	0.0166715	0	0.0550528	0.08	0.0961422	1.04641
H376.VIII.53.VFC	H376.VIII.53	2 yrs	F	stage4	0.104965	0	0.662355	0	0.0452476	0	0	0	0	0.00779382	0	0.157498	0	0.0221284	0	0	0.03	0.133106	1.03427
H376.VIII.53.A1C	H376.VIII.53	2 yrs	F	stage4	0	0	0.479636	0.0591788	0	0	0.110027	0	0	0	0.0619222	0.235615	0	0	0	0.0536211	0.06	0.110069	1.05132
H376.VIII.53.V1C	H376.VIII.53	2 yrs	F	stage4	0	0	0.769997	0	0	0	0.0484622	0	0	0.0592065	0	0.100165	0	0.0221692	0	0	0.03	0.128178	1.03607
H376.VIII.53.STR	H376.VIII.53	2 yrs	F	stage4	0	0	0.460562	0	0	0.0421457	0.0284182	0	0.0573993	0	0.0983769	0.141422	0	0	0	0.171675	0.37	0.0147579	1.08546
H376.VIII.53.M1C	H376.VIII.53	2 yrs	F	stage4	0	0	0.397276	0.0709077	0	0	0.0809821	0	0	0	0.0843777	0.192253	0	0	0	0.174204	0.07	0.0989075	1.04817
H376.VIII.53.IPC	H376.VIII.53	2 yrs	F	stage4	0.0251732	0	0.741996	0	0.0110858	0	0.0353783	0	0	0.018821	0	0.14243	0	0.017169	0.00794625	0	0.03	0.178105	1.0149
H376.VIII.53.S1C	H376.VIII.53	2 yrs	F	stage4	0.00243908	0	0.725142	0	0.0531651	0	0.0254969	0	0	0.0226193	0.0214419	0.148811	0	0.0009	0	0	0.03	0.147191	1.02792
H376.VIII.53.CBC	H376.VIII.53	2 yrs	F	stage4	0	0	0.240504	0.331355	0.0110091	0	0.116144	0	0	0.0210146	0.0736695	0.0977093	0	0	0	0.108595	0.21	0.0439636	1.06812
H376.VIII.53.MD	H376.VIII.53	2 yrs	F	stage4	0	0	0.763058	0	0	0	0.115593	0	0	0.00541763	0.0222186	0.0760676	0	0.00159108	0.00418238	0.011871	0.56	-0.0011	1.08514
H376.VIII.52.AMY	H376.VIII.52	3 yrs	F	stage4	0.0628805	0	0.58943	0.0235958	0.0460082	0	0.0541021	0	0	0	0.0204441	0.174042	0	0.0170487	0	0.0124487	0.03	0.162989	1.0223
H376.VIII.52.STC	H376.VIII.52	3 yrs	F	stage4	0.112831	0	0.566368	0.0124169	0.161577	0	0	0	0	0	0.0382657	0.108541	0	0	0	0	0.03	0.210676	1.00141
H376.VIII.52.MFC	H376.VIII.52	3 yrs	F	stage4	0.0539251	0	0.675955	0.0158262	0.046127	0	0	0	0	0	0.00263206	0.180396	0	0.0242769	0.0009	0	0.02	0.229217	0.994642
H376.VIII.52.DFC	H376.VIII.52	3 yrs	F	stage4	0.113012	0	0.587251	0.0274861	0.113369	0	0	0	0	0.00614309	0.0211839	0.126541	0	0.00501367	0	0	0.02	0.241171	0.98805
H376.VIII.52.OFC	H376.VIII.52	3 yrs	F	stage4	0.102693	0	0.5768	0.0129144	0.146302	0	0	0	0	0.0151612	0.00537793	0.126718	0	0.0140339	0	0	0.03	0.214368	1.00075
H376.VIII.52.ITC	H376.VIII.52	3 yrs	F	stage4	0.137623	0	0.526026	0.0240424	0.15986	0	0.00299444	0.00271182	0	0.013677	0.0246556	0.101713	0	0.00601964	0.0007	0	0.02	0.226668	0.99509
H376.VIII.52.HIP	H376.VIII.52	3 yrs	F	stage4	0.0547661	0	0.597766	0	0.0981286	0	0.0394197	0.00420356	0	0	0.0459978	0.13803	0	0	0	0.0216889	0.03	0.141152	1.0287
H376.VIII.52.VFC	H376.VIII.52	3 yrs	F	stage4	0.0740222	0	0.596434	0.0576582	0.061437	0	0	0	0.025267	0	0.0292303	0.148503	0	0.00744766	0	0	0.01	0.282225	0.970609
H376.VIII.52.A1C	H376.VIII.52	3 yrs	F	stage4	0.160633	0	0.534129	0.00998587	0.134836	0	0	0	0	0.0005	0.0255062	0.122898	0	0.0115271	0	0	0.03	0.210006	1.00202
H376.VIII.52.V1C	H376.VIII.52	3 yrs	F	stage4	0.0856047	0	0.594385	0.0246023	0.140084	0	0	0	0	0	0.052676	0.102648	0	0	0	0	0.03	0.210305	1.00083
H376.VIII.52.STR	H376.VIII.52	3 yrs	F	stage4	0	0	0.69054	0	0.00279555	0.0123967	0.00643478	0.0315522	0	0.0008	0.0386555	0.117798	0	0	0	0.0990315	0.06	0.110022	1.03417
H376.VIII.52.M1C	H376.VIII.52	3 yrs	F	stage4	0.114915	0	0.513223	0.0309529	0.125368	0	0	0	0	0.00302636	0.0330983	0.149394	0	0.0102526	0	0.0197689	0.02	0.239989	0.988635
H376.VIII.52.IPC	H376.VIII.52	3 yrs	F	stage4	0.124948	0	0.549606	0.029412	0.152448	0	0	0	0	0.00727362	0.0160086	0.116142	0	0.00416149	0	0	0.01	0.289475	0.967694
H376.VIII.52.S1C	H376.VIII.52	3 yrs	F	stage4	0.0993793	0	0.56394	0.015741	0.150216	0	0	0	0	0.0227679	0.0236652	0.117838	0	0.00645298	0	0	0.03	0.211078	1.00165
H376.VIII.52.CBC	H376.VIII.52	3 yrs	F	stage4	0.0127164	0	0.557249	0.109411	0.0689309	0	0	0.00866088	0	0.00755121	0.057369	0.145103	0	0	0.0117563	0.0212513	0.12	0.0832827	1.0516
H376.VIII.52.MD	H376.VIII.52	3 yrs	F	stage4	0	0	0.622886	0	0.0394031	0	0.0700363	0.00137045	0	0.00466585	0.0525884	0.13384	0	0	0	0.0752099	0.27	0.0327454	1.06777
H376.VIII.54.AMY	H376.VIII.54	3 yrs	M	stage4	0.0569178	0	0.597026	0.0358168	0.0515719	0	0.0382264	0	0	0.0344187	0.0303497	0.115253	0	0	0	0.0404201	0.03	0.149521	1.02365
H376.VIII.54.STC	H376.VIII.54	3 yrs	M	stage4	0.100163	0	0.561398	0.0293244	0.0869533	0	0.0120387	0	0	0.029869	0.0242945	0.112645	0	0.00728971	0	0.0360249	0.03	0.200107	1.00366
H376.VIII.54.MFC	H376.VIII.54	3 yrs	M	stage4	0.0767012	0	0.627914	0.00927212	0.0151531	0	0.0420359	0	0	0.0245999	0.0180189	0.133606	0	0.00711726	0	0.0455816	0.03	0.194699	1.00543
H376.VIII.54.DFC	H376.VIII.54	3 yrs	M	stage4	0.082506	0	0.546416	0	0.127462	0	0.0308712	0	0	0	0.0644926	0.122167	0	0	0	0.026085	0.03	0.178563	1.01334
H376.VIII.54.OFC	H376.VIII.54	3 yrs	M	stage4	0.0968057	0	0.556046	0.00774584	0.115611	0	0.029589	0	0	0	0.0489591	0.12875	0	0	0	0.0164937	0.03	0.189556	1.0091
H376.VIII.54.ITC	H376.VIII.54	3 yrs	M	stage4	0.0665397	0	0.546394	0.0445714	0.0326611	0	0.0286862	0	0	0.0438693	0.0419173	0.128697	0	0.00944577	0	0.0572186	0.03	0.180641	1.01199
H376.VIII.54.HIP	H376.VIII.54	3 yrs	M	stage4	0.0508412	0	0.679954	0	0.0379905	0	0.0785897	0	0	0	0.00961555	0.132459	0	0	0.0105507	0	0.06	0.110522	1.04215
H376.VIII.54.VFC	H376.VIII.54	3 yrs	M	stage4	0.0416883	0	0.619314	0	0.13504	0	0.0399706	0	0	0	0.0267889	0.104734	0	0	0	0.0324641	0.03	0.146526	1.02655
H376.VIII.54.A1C	H376.VIII.54	3 yrs	M	stage4	0.0769201	0	0.621983	0	0.0334924	0	0.0267599	0	0	0.013854	0.0359076	0.139748	0	0.0137365	0	0.0375989	0.03	0.192612	1.00708
H376.VIII.54.V1C	H376.VIII.54	3 yrs	M	stage4	0	0	0.603957	0.0534476	0	0	0.0759362	0	0	0	0	0.216809	0	0.0295375	0	0.0203124	0.03	0.185176	1.01624
H376.VIII.54.STR	H376.VIII.54	3 yrs	M	stage4	0	0	0.221066	0.0120605	0	0	0.114033	0	0	0.058412	0.135178	0.320903	0	0.00127701	0	0.137071	0.15	0.0623541	1.12992
H376.VIII.54.M1C	H376.VIII.54	3 yrs	M	stage4	0.0224143	0	0.618429	0.00345648	0.0424348	0	0.075545	0	0	0	0	0.188026	0	0.0299574	0	0.0197371	0.03	0.182939	1.01563
H376.VIII.54.IPC	H376.VIII.54	3 yrs	M	stage4	0.0651829	0	0.613493	0.0245851	0.0291221	0	0.0239749	0	0	0.00668466	0.0422741	0.132859	0	0.00601579	0	0.055809	0.03	0.187582	1.00735
H376.VIII.54.S1C	H376.VIII.54	3 yrs	M	stage4	0.096766	0	0.580727	0.00442368	0	0	0.0207814	0	0	0.0295128	0.0131911	0.165121	0	0.0204664	0	0.0690106	0.03	0.177219	1.01437
H376.VIII.54.CBC	H376.VIII.54	3 yrs	M	stage4	0	0	0.367738	0.0220201	0.111952	0	0.0825794	0	0	0.0100355	0.106745	0.180223	0	0	0	0.118707	0.16	0.0504328	1.07412
H376.VIII.54.MD	H376.VIII.54	3 yrs	M	stage4	0	0	0.112224	0	0	0	0.211505	0	0	0.0273542	0.124124	0.376304	0	0	0	0.148489	0.22	0.0421648	1.15685
H376.VIII.50.AMY	H376.VIII.50	4 yrs	M	stage4	0.0216187	0	0.641506	0.116671	0.055592	0	0	0.028038	0.0216127	0	0	0.0776513	0	0.0137875	0	0.0235223	0.03	0.211043	0.999322
H376.VIII.50.STC	H376.VIII.50	4 yrs	M	stage4	0.0938335	0	0.589449	0.0689018	0.130613	0	0	0	0.0319826	0	0	0.0629927	0	0.0222269	0	0	0.02	0.230765	0.994299
H376.VIII.50.MFC	H376.VIII.50	4 yrs	M	stage4	0.0528493	0	0.541646	0.0983497	0.107288	0	0	0.00822009	0	0	0.0167322	0.129473	0	0.00913104	0	0.0363104	0.02	0.228023	0.992288
H376.VIII.50.DFC	H376.VIII.50	4 yrs	M	stage4	0.166761	0	0.554037	0.0111951	0.142679	0	0.00637877	0	0	0.0117445	0.0135686	0.0834289	0	0.0102069	0	0	0.03	0.166511	1.02112
H376.VIII.50.OFC	H376.VIII.50	4 yrs	M	stage4	0.140129	0	0.433255	0.1709	0.0733927	0	0	0	0	0.00976491	0.0321097	0.12456	0	0.00810937	0.00225968	0.00551871	0.03	0.2032	1.00361
H376.VIII.50.ITC	H376.VIII.50	4 yrs	M	stage4	0.0746063	0	0.59389	0.0887232	0.0501535	0	0	0.0009	0.021017	0	0	0.132585	0	0.0263657	0	0.0117227	0.02	0.22269	0.995803
H376.VIII.50.HIP	H376.VIII.50	4 yrs	M	stage4	0	0	0.87614	0.00163341	0	0	0.0439832	0.00175283	0.0176581	0	0.00880117	0.00786709	0	0	0	0.0421642	0.02	0.23037	0.993903
H376.VIII.50.VFC	H376.VIII.50	4 yrs	M	stage4	0.164794	0	0.535226	0.0151658	0.115426	0	0	0	0	0.0022642	0.0205991	0.109115	0	0.0149586	0	0.0224511	0.02	0.229024	0.992696
H376.VIII.50.A1C	H376.VIII.50	4 yrs	M	stage4	0.0900696	0	0.727509	0	0.117178	0	0	0	0.0151136	0	0	0.0214201	0	0.00792903	0	0.0207808	0.02	0.239625	0.991244
H376.VIII.50.V1C	H376.VIII.50	4 yrs	M	stage4	0.140459	0	0.497925	0.0910002	0.104725	0	0.00151025	0	0	0.0038219	0.0370786	0.108998	0	0.00362468	0	0.0108568	0.02	0.224284	0.99434
H376.VIII.50.STR	H376.VIII.50	4 yrs	M	stage4	0.067972	0	0.627894	0	0.15879	0	0	0	0	0	0.0169775	0.0691096	0	0	0	0.0592576	0.03	0.155935	1.02196
H376.VIII.50.M1C	H376.VIII.50	4 yrs	M	stage4	0.0263493	0	0.781391	0	0.135201	0	0	0.0006	0	0.0174135	0	0.0139702	0	0	0.00280539	0.0222225	0.02	0.224558	0.998401
H376.VIII.50.IPC	H376.VIII.50	4 yrs	M	stage4	0.0883343	0	0.522946	0.0752568	0.138835	0	0	0	0.0169451	0	0.00401798	0.123709	0	0.0118987	0	0.0180568	0.02	0.216512	0.999003
H376.VIII.50.S1C	H376.VIII.50	4 yrs	M	stage4	0.098276	0	0.684005	0	0.123609	0	0	0	0	0	0.0003	0.0581196	0	0.00925687	0	0.0264538	0.02	0.228159	0.994563
H376.VIII.50.CBC	H376.VIII.50	4 yrs	M	stage4	0	0	0.460466	0.0635848	0.0571178	0	0.0193143	0.00737316	0.001	0	0.0282208	0.267616	0	0.0130387	0.020854	0.0614215	0.27	0.0339352	1.08997
H376.VIII.50.MD	H376.VIII.50	4 yrs	M	stage4	0	0	0.50898	0	0.0905805	0	0.0663971	0.00165418	0	0	0.0725811	0.139019	0	0	0	0.120788	0.07	0.098865	1.04274
H376.IX.51.AMY	H376.IX.51	8 yrs	M	stage5	0.0706357	0	0.564231	0.0602538	0.0761604	0	0.0342861	0.00249525	0	0	0	0.145522	0	0.0229169	0	0.0234993	0.02	0.224826	0.995075
H376.IX.51.STC	H376.IX.51	8 yrs	M	stage5	0.102913	0	0.540434	0.0893684	0.123904	0	0	0	0.0200537	0	0	0.0955511	0	0.027775	0	0	0.02	0.236242	0.991682
H376.IX.51.MFC	H376.IX.51	8 yrs	M	stage5	0.0964141	0	0.535398	0.0356283	0.123814	0	0	0.00683043	0.0514284	0	0	0.101523	0	0.021409	0	0.0275551	0.03	0.18572	1.01183
H376.IX.51.DFC	H376.IX.51	8 yrs	M	stage5	0.130206	0	0.493116	0.0865847	0.0838655	0	0.0125219	0	0	0.0298067	0.016306	0.125009	0	0.0149639	0	0.00762074	0.02	0.22095	0.996847
H376.IX.51.OFC	H376.IX.51	8 yrs	M	stage5	0.0897662	0	0.563907	0.065178	0.116914	0	0	0	0.0210597	0	0.0153497	0.102161	0	0.0112489	0	0.0144153	0.03	0.204591	1.00323
H376.IX.51.ITC	H376.IX.51	8 yrs	M	stage5	0.084949	0	0.56393	0.0953075	0.0968015	0	0	0	0	0	0	0.115882	0	0.0274397	0	0.0156905	0.02	0.236539	0.99023
H376.IX.51.HIP	H376.IX.51	8 yrs	M	stage5	0.0735127	0	0.596353	0.0237149	0.122473	0	0	0.00356612	0	0.00280403	0.0251371	0.142811	0	0.0044772	0.00344047	0.00171008	0.02	0.272794	0.97452
H376.IX.51.VFC	H376.IX.51	8 yrs	M	stage5	0.123797	0	0.506682	0.0936632	0.129195	0	0	0	0.00727225	0	0	0.10741	0	0.0319799	0	0	0.02	0.233874	0.993066
H376.IX.51.A1C	H376.IX.51	8 yrs	M	stage5	0.0982788	0	0.592405	0.0391942	0.125817	0	0	0.0038372	0.0417653	0	0	0.0713675	0	0.0273346	0	0	0.03	0.206618	1.00446
H376.IX.51.V1C	H376.IX.51	8 yrs	M	stage5	0.0438873	0	0.687475	0	0.123787	0	0	0	0.00582371	0	0	0.105499	0	0.028332	0.00519644	0	0.02	0.231446	0.993486
H376.IX.51.STR	H376.IX.51	8 yrs	M	stage5	0.0731464	0	0.512196	0	0.155364	0	0	0	0	0	0.0579363	0.122107	0	0	0	0.0792502	0.03	0.142298	1.02579
H376.IX.51.M1C	H376.IX.51	8 yrs	M	stage5	0.0712755	0	0.571351	0.0884422	0.120739	0	0	0	0.0428178	0	0	0.0862702	0	0.0129583	0	0.00614565	0.03	0.208423	1.00268
H376.IX.51.IPC	H376.IX.51	8 yrs	M	stage5	0.121635	0	0.547721	0.0642683	0.11839	0	0	0	0	0.00321882	0	0.102854	0	0.0419132	0	0	0.03	0.214222	1.00173
H376.IX.51.S1C	H376.IX.51	8 yrs	M	stage5	0.0869579	0	0.638118	0	0.136782	0	0	0	0.0503975	0	0	0.0646242	0	0.023083	0	0	0.02	0.229153	0.994933
H376.IX.51.CBC	H376.IX.51	8 yrs	M	stage5	0.0226388	0	0.414633	0.0344305	0.134807	0	0.0436899	0.0105197	0	0.0138135	0.0437411	0.236661	0	0	0	0.0450655	0.19	0.0457572	1.08197
H376.IX.51.MD	H376.IX.51	8 yrs	M	stage5	0.00629527	0	0.585502	0	0.0648638	0	0.0222564	0	0	0.00888653	0.0346378	0.16327	0	0.00907496	0	0.105213	0.11	0.0874848	1.0483
H376.IX.52.AMY	H376.IX.52	8 yrs	M	stage5	0.165823	0	0.419987	0.122003	0.112258	0	0	0.00257813	0	0.011883	0.0295145	0.127269	0	0.0007	0.0005	0.00755583	0.03	0.162632	1.02096
H376.IX.52.STC	H376.IX.52	8 yrs	M	stage5	0.094731	0	0.588021	0.0624267	0.119559	0	0	0	0	0	0.0144253	0.0940714	0	0.0203228	0.00644271	0	0.03	0.182522	1.01356
H376.IX.52.MFC	H376.IX.52	8 yrs	M	stage5	0.225921	0	0.401351	0.126245	0.0990372	0	0	0	0	0.00542801	0.0100253	0.10912	0	0.0228728	0	0	0.02	0.230746	0.993647
H376.IX.52.DFC	H376.IX.52	8 yrs	M	stage5	0.190897	0	0.408047	0.192858	0.0504149	0	0	0	0	0.00777948	0.02002	0.112721	0	0.0154654	0.00179816	0	0.02	0.215198	0.998881
H376.IX.52.OFC	H376.IX.52	8 yrs	M	stage5	0.0813819	0	0.599049	0.0904952	0.116205	0	0	0	0.0001	0	0.0129296	0.0889673	0	0.00969656	0.0011504	0	0.03	0.204428	1.00435
H376.IX.52.ITC	H376.IX.52	8 yrs	M	stage5	0.161013	0	0.361572	0.231509	0.0480898	0	0	0	0	0.0179958	0.0165589	0.132293	0	0.0241014	0.00430724	0.00256041	0.02	0.220388	0.997623
H376.IX.52.HIP	H376.IX.52	8 yrs	M	stage5	0.164116	0	0.451718	0.090209	0.14553	0	0.00855199	0.011134	0	0	0.0249001	0.097399	0	0.0009	0	0.00550343	0.01	0.285597	0.969216
H376.IX.52.VFC	H376.IX.52	8 yrs	M	stage5	0.0830807	0	0.582048	0.0696238	0.15442	0	0	0.00684763	0.00935009	0	0.0105754	0.0737536	0	0.00727632	0	0.00302438	0.03	0.17647	1.01708
H376.IX.52.A1C	H376.IX.52	8 yrs	M	stage5	0.107069	0	0.50272	0.0889849	0.0942603	0	0	0.00723883	0	0	0.0415252	0.127852	0	0.0140401	0	0.0163096	0.03	0.16137	1.02053
H376.IX.52.V1C	H376.IX.52	8 yrs	M	stage5	0.105036	0	0.608492	0.074776	0.0691023	0	0	0.00199249	0	0.00427391	0.019543	0.0981236	0	0.015235	0.00342553	0	0.03	0.205855	1.00242
H376.IX.52.STR	H376.IX.52	8 yrs	M	stage5	0.0180293	0	0.559414	0.092297	0	0	0.0243308	0	0	0	0.0294538	0.219755	0	0	0	0.0567193	0.07	0.103151	1.0477
H376.IX.52.M1C	H376.IX.52	8 yrs	M	stage5	0.103682	0	0.576334	0.0810817	0.115532	0	0	0.00252673	0.00280339	0	0.0100937	0.0891457	0	0.0142773	0.00452301	0	0.03	0.206978	1.0032
H376.IX.52.IPC	H376.IX.52	8 yrs	M	stage5	0.0843379	0	0.520739	0.0902767	0.126888	0	0	0	0	0	0.0279997	0.127813	0	0.0137319	0	0.00821457	0.03	0.206819	1.00296
H376.IX.52.S1C	H376.IX.52	8 yrs	M	stage5	0.097002	0	0.585418	0.0812315	0.107257	0	0	0.00470992	0	0	0.0125737	0.0930435	0	0.0100235	0.00874028	0	0.03	0.206238	1.00292
H376.IX.52.CBC	H376.IX.52	8 yrs	M	stage5	0	0	0.36753	0	0.0742255	0	0.0933366	0	0	0.0181802	0.11352	0.181413	0	0	0	0.151793	0.15	0.0622777	1.07035
H376.IX.52.MD	H376.IX.52	8 yrs	M	stage5	0.208214	0	0.162155	0.332704	0.100318	0	0.0305052	0	0.0009	0.0723985	0	0.0199002	0	0.0353316	0.037551	0	0.07	0.102214	1.0558
H376.IX.50.AMY	H376.IX.50	11 yrs	F	stage5	0.0576824	0	0.547298	0.102712	0.0991347	0	0.0119197	0.0154471	0.0203513	0	0.0228122	0.0910867	0	0.00406516	0	0.027491	0.02	0.262287	0.977735
H376.IX.50.STC	H376.IX.50	11 yrs	F	stage5	0.17703	0	0.387846	0.183575	0.106061	0	0	0	0	0.0131961	0.0160561	0.0991798	0	0.0135204	0.00353651	0	0.01	0.278886	0.972359
H376.IX.50.MFC	H376.IX.50	11 yrs	F	stage5	0.111515	0	0.515877	0.0840123	0.149519	0	0	0.00213265	0.0361878	0	0	0.0789096	0	0.0218457	0	0	0.02	0.236133	0.992218
H376.IX.50.DFC	H376.IX.50	11 yrs	F	stage5	0.125862	0	0.558358	0.0755505	0.141665	0	0	0	0.00972525	0	0	0.0571137	0	0.0182339	0.0134908	0	0.02	0.216518	1.00085
H376.IX.50.OFC	H376.IX.50	11 yrs	F	stage5	0.0908503	0	0.597745	0.0617692	0.159172	0	0	0	0.00485989	0	0	0.069801	0	0.0158018	0	0	0.02	0.241554	0.990437
H376.IX.50.ITC	H376.IX.50	11 yrs	F	stage5	0.18738	0	0.387212	0.171681	0.120151	0	0	0.0073859	0	0.0235484	0.00627595	0.0811326	0	0.0134401	0.0017936	0	0.01	0.323108	0.953032
H376.IX.50.HIP	H376.IX.50	11 yrs	F	stage5	0.158285	0	0.503681	0.0766176	0.106648	0	0	0.0106316	0	0	0.0167816	0.0904313	0	0.00973534	0	0.0271881	0.01	0.296528	0.963387
H376.IX.50.VFC	H376.IX.50	11 yrs	F	stage5	0.102913	0	0.556871	0.0828774	0.148341	0	0	0	0.0262838	0	0	0.0649551	0	0.0176817	0.0001	0	0.03	0.206515	1.00519
H376.IX.50.A1C	H376.IX.50	11 yrs	F	stage5	0.138779	0	0.481498	0.166589	0.0902671	0	0	0	0	0.0138702	0.0109123	0.0831496	0	0.0139839	0.001	0	0.01	0.276036	0.973448
H376.IX.50.V1C	H376.IX.50	11 yrs	F	stage5	0.0355627	0	0.682874	0.0632435	0.104316	0	0	0	0.00614862	0	0.00984413	0.0822724	0	0.0157389	0	0	0.01	0.304259	0.961372
H376.IX.50.STR	H376.IX.50	11 yrs	F	stage5	0.179305	0	0.405497	0.0294237	0.108424	0	0.00662031	0	0	0	0.0663735	0.170466	0	0	0	0.0338903	0.03	0.186785	1.01195
H376.IX.50.M1C	H376.IX.50	11 yrs	F	stage5	0.107172	0	0.5445	0.0855324	0.128438	0	0	0.0121528	0.036517	0	0	0.0680121	0	0.0176764	0	0	0.02	0.229644	0.994296
H376.IX.50.IPC	H376.IX.50	11 yrs	F	stage5	0.0854962	0	0.595539	0.0742954	0.145015	0	0	0	0.010725	0	0	0.0682022	0	0.0190035	0.0017237	0	0.02	0.230966	0.994663
H376.IX.50.S1C	H376.IX.50	11 yrs	F	stage5	0.100055	0	0.596107	0.0505819	0.150971	0	0	0	0.00781022	0	0	0.074433	0	0.0197522	0.0003	0	0.01	0.293916	0.966883
H376.IX.50.CBC	H376.IX.50	11 yrs	F	stage5	0	0	0.409673	0	0.105793	0	0.057516	0	0	0	0.110378	0.198356	0	0	0	0.118284	0.11	0.0866644	1.05963
H376.IX.50.MD	H376.IX.50	11 yrs	F	stage5	0.1842	0	0.271917	0.130098	0.0911852	0	0.0342947	0	0	0.0264392	0.0123173	0.242007	0	0.00632759	0	0.00121352	0.03	0.133881	1.04587
H376.X.51.AMY	H376.X.51	13 yrs	F	stage5	0.0899503	0	0.545243	0.081655	0.124097	0	0	0.0008	0	0	0.0246744	0.113863	0	0.00825291	0	0.011501	0.02	0.237712	0.989242
H376.X.51.STC	H376.X.51	13 yrs	F	stage5	0.112151	0	0.539272	0.0596877	0.140649	0	0	0	0.0270682	0	0.0172845	0.0872706	0	0.0166165	0	0	0.03	0.212485	1.00144
H376.X.51.MFC	H376.X.51	13 yrs	F	stage5	0.0976883	0	0.511702	0.079349	0.144289	0	0	0	0.0167878	0	0.0254217	0.112682	0	0.00393086	0	0.00814898	0.03	0.187799	1.01096
H376.X.51.DFC	H376.X.51	13 yrs	F	stage5	0.0759921	0	0.618348	0.074488	0.119417	0	0	0	0	0	0.0236885	0.0795007	0	0.00599358	0.00257128	0	0.02	0.221746	0.996725
H376.X.51.OFC	H376.X.51	13 yrs	F	stage5	0.0886062	0	0.599977	0.0647612	0.11396	0	0	0	0.011098	0	0.0343587	0.0841705	0	0.00306751	0	0	0.03	0.213352	0.999618
H376.X.51.ITC	H376.X.51	13 yrs	F	stage5	0.117854	0	0.510406	0.0763544	0.133851	0	0	0	0.0436329	0	0.0213626	0.0845836	0	0.00769629	0	0.00425916	0.03	0.180585	1.0143
H376.X.51.HIP	H376.X.51	13 yrs	F	stage5	0.0924765	0	0.532593	0	0.0830391	0	0.0193774	0	0	0	0.0500614	0.195281	0	0.0221087	0	0.00506293	0.03	0.150228	1.03146
H376.X.51.VFC	H376.X.51	13 yrs	F	stage5	0.0899483	0	0.591754	0.0720478	0.126932	0	0	0	0.0228051	0	0.00463749	0.0802196	0	0.0116557	0	0	0.02	0.235938	0.991266
H376.X.51.A1C	H376.X.51	13 yrs	F	stage5	0.0525749	0	0.666663	0.0709148	0.101505	0	0	0	0.0151885	0	0.0079906	0.0742532	0	0.00976156	0.00114911	0	0.02	0.2455	0.986822
H376.X.51.V1C	H376.X.51	13 yrs	F	stage5	0.0413043	0	0.69686	0.0107539	0.0737205	0	0.0124847	0	0.0172799	0	0.010542	0.11803	0	0.019025	0	0	0.02	0.243666	0.987257
H376.X.51.STR	H376.X.51	13 yrs	F	stage5	0.0735709	0	0.629521	0	0.0374082	0	0.0326418	0	0	0	0.0632148	0.137918	0	0	0	0.0257259	0.03	0.168937	1.01639
H376.X.51.M1C	H376.X.51	13 yrs	F	stage5	0.0716017	0	0.618996	0.0694859	0.133752	0	0	0	0	0	0.0180016	0.0806136	0	0.00754943	0	0	0.02	0.230489	0.993591
H376.X.51.IPC	H376.X.51	13 yrs	F	stage5	0.0728942	0	0.623205	0.0781354	0.12321	0	0	0	0.00508074	0	0.0285276	0.0689474	0	0	0	0	0.03	0.200963	1.00562
H376.X.51.S1C	H376.X.51	13 yrs	F	stage5	0.0768731	0	0.600696	0.073349	0.123256	0	0	0	0	0	0.020798	0.0868873	0	0.0129114	0.00522917	0	0.02	0.221677	0.996833
H376.X.51.CBC	H376.X.51	13 yrs	F	stage5	0	0	0.409373	0.00418112	0.136795	0	0.0868257	0	0	0.00883038	0.0759377	0.191826	0	0	0	0.0862304	0.12	0.0786734	1.06272
H376.X.51.MD	H376.X.51	13 yrs	F	stage5	0	0	0.532701	0	0.0523615	0	0.0320931	0.0018127	0	0.00476042	0.0723613	0.242425	0	0.0179523	0	0.0435331	0.23	0.0367642	1.08826
H376.X.53.AMY	H376.X.53	18 yrs	M	stage6	0.0531255	0	0.630978	0	0.046092	0	0.0337287	0	0	0.0210291	0.0288067	0.156575	0	0.0249587	0	0.00470722	0.03	0.129806	1.03692
H376.X.53.STC	H376.X.53	18 yrs	M	stage6	0.145523	0	0.53216	0.0109147	0.0224887	0	0.0322809	0.00205045	0	0.0036673	0.013493	0.195437	0	0.0419855	0	0	0.03	0.136632	1.03761
H376.X.53.MFC	H376.X.53	18 yrs	M	stage6	0.0376735	0	0.652748	0	0	0	0.0406479	0	0	0.0251005	0.0348855	0.163538	0	0.0203232	0	0.025083	0.03	0.168727	1.01988
H376.X.53.DFC	H376.X.53	18 yrs	M	stage6	0.104211	0	0.54175	0.0616219	0.080115	0	0.00742676	0	0	0.0432968	0.0192537	0.120197	0	0.0166314	0.00549693	0	0.03	0.210855	1.00148
H376.X.53.OFC	H376.X.53	18 yrs	M	stage6	0.0877622	0	0.597981	0	0.0926774	0	0	0	0	0	0.0276082	0.166982	0	0.0269894	0	0	0.03	0.197817	1.00852
H376.X.53.ITC	H376.X.53	18 yrs	M	stage6	0.0924879	0	0.579115	0	0.0808522	0	0.00608331	0	0	0	0.0117299	0.185595	0	0.039784	0	0.0043522	0.03	0.188565	1.01418
H376.X.53.HIP	H376.X.53	18 yrs	M	stage6	0.0304497	0	0.641883	0.0062088	0.078356	0	0.0519636	0	0	0	0.0251043	0.147024	0	0	0	0.0190111	0.06	0.111203	1.04132
H376.X.53.VFC	H376.X.53	18 yrs	M	stage6	0.0685861	0	0.617839	0	0.0802369	0	0	0	0	0	0.0398847	0.164638	0	0.0288148	0	0	0.03	0.210144	1.00323
H376.X.53.A1C	H376.X.53	18 yrs	M	stage6	0	0	0.737164	0	0.0194266	0	0.0498461	0	0	0.0390635	0.0266963	0.116266	0	0.0109306	0	0.0006	0.03	0.139618	1.03063
H376.X.53.V1C	H376.X.53	18 yrs	M	stage6	0.0383623	0	0.681001	0.0139203	0.0428286	0	0.0437974	0	0	0.0587934	0.0263061	0.0844567	0	0.0105341	0	0	0.03	0.191303	1.00927
H376.X.53.STR	H376.X.53	18 yrs	M	stage6	0	0	0	0	0.079157	0	0.0968128	0	0	0.0393147	0.245257	0.376339	0	0	0	0.16312	0.32	0.0218059	1.2155
H376.X.53.M1C	H376.X.53	18 yrs	M	stage6	0.0580444	0	0.654894	0.0224311	0.0491746	0	0.029413	0	0	0.0547653	0.0007	0.110425	0	0.0201259	0	0	0.03	0.131051	1.03499
H376.X.53.IPC	H376.X.53	18 yrs	M	stage6	0.0983216	0	0.644953	0.00480441	0.0441023	0	0	0	0.00349723	0	0	0.159772	0	0.0445497	0	0	0.02	0.226621	0.996089
H376.X.53.S1C	H376.X.53	18 yrs	M	stage6	0.0473892	0	0.661783	0.0127904	0.0335553	0	0.050148	0	0	0.0182812	0.0182586	0.139737	0	0.0180569	0	0	0.03	0.128302	1.03585
H376.X.53.CBC	H376.X.53	18 yrs	M	stage6	0	0	0.541131	0.0706386	0	0	0.0202904	0.0161645	0	0	0.0618053	0.245732	0	0.00231017	0	0.0419289	0.16	0.0591571	1.07336
H376.X.53.MD	H376.X.53	18 yrs	M	stage6	0	0	0.069222	0	0.0861904	0	0.0632477	0.0280579	0.277812	0.0658873	0	0	0.0248833	0	0	0.384699	0.47	0.00782305	1.14228
H376.X.52.AMY	H376.X.52	19 yrs	F	stage6	0.156987	0	0.443692	0.069548	0.136301	0	0.00797236	0.00459914	0	0.00570135	0.0380017	0.134595	0	0.0026025	0	0	0.03	0.184959	1.01269
H376.X.52.STC	H376.X.52	19 yrs	F	stage6	0.0680598	0	0.631499	0.0667498	0.123547	0	0	0	0.0008	0	0.0181014	0.0859884	0	0.0035788	0.00172397	0	0.02	0.224416	0.995692
H376.X.52.MFC	H376.X.52	19 yrs	F	stage6	0.146575	0	0.465207	0.161143	0.059242	0	0.00994931	0	0	0.00374725	0.0299558	0.114349	0	0.0098328	0	0	0.02	0.261741	0.978765
H376.X.52.DFC	H376.X.52	19 yrs	F	stage6	0.0999786	0	0.555392	0.0721782	0.129906	0	0	0	0	0	0.0232205	0.105308	0	0.00994854	0.00406933	0	0.02	0.227979	0.993976
H376.X.52.OFC	H376.X.52	19 yrs	F	stage6	0.119624	0	0.523975	0.13438	0.0618153	0	0.00722529	0	0	0.00918202	0.0234616	0.110898	0	0.00943908	0	0	0.02	0.240562	0.987754
H376.X.52.ITC	H376.X.52	19 yrs	F	stage6	0.0562786	0	0.564804	0.0688224	0.105777	0	0	0.0111353	0.0461454	0	0.0174981	0.110404	0	0	0	0.0191357	0.03	0.159795	1.02119
H376.X.52.HIP	H376.X.52	19 yrs	F	stage6	0.0669932	0	0.496173	0.0956545	0.0409206	0	0.0252551	0	0.0189879	0	0.0720504	0.144651	0	0.0003	0	0.0390422	0.03	0.212286	0.999377
H376.X.52.VFC	H376.X.52	19 yrs	F	stage6	0.0620654	0	0.583894	0.0613298	0.105435	0	0	0	0.0314725	0	0.0260629	0.116649	0	0	0	0.0130916	0.03	0.177291	1.01421
H376.X.52.A1C	H376.X.52	19 yrs	F	stage6	0.0313734	0	0.678555	0.0319528	0.116178	0	0.0210251	0	0	0	0.00790214	0.0988679	0	0.0141457	0	0	0.01	0.290929	0.967367
H376.X.52.V1C	H376.X.52	19 yrs	F	stage6	0.0218525	0	0.686977	0.0577501	0.134399	0	0	0	0.0003	0	0.0092333	0.0721654	0	0.0123063	0.00505827	0	0.02	0.228622	0.995009
H376.X.52.STR	H376.X.52	19 yrs	F	stage6	0.131913	0	0.496093	0	0.0216207	0	0.0648502	0	0.013895	0	0.0576362	0.17965	0	0	0	0.0343427	0.03	0.170588	1.01957
H376.X.52.M1C	H376.X.52	19 yrs	F	stage6	0.0937773	0	0.526902	0.121484	0.0784217	0	0.0171559	0	0	0.00274679	0.0310966	0.117999	0	0.0104162	0	0	0.02	0.238948	0.988747
H376.X.52.IPC	H376.X.52	19 yrs	F	stage6	0.0855817	0	0.58917	0.0846512	0.144379	0	0	0	0	0.0005	0.00324705	0.0671731	0	0.0124276	0.0129041	0	0.01	0.28567	0.970294
H376.X.52.S1C	H376.X.52	19 yrs	F	stage6	0.0510681	0	0.638324	0.0574321	0.13925	0	0	0	0	0.00141421	0.00899721	0.0921301	0	0.0113839	0	0	0.01	0.286266	0.969542
H376.X.52.CBC	H376.X.52	19 yrs	F	stage6	0.0217302	0	0.363528	0.0594237	0.141706	0	0	0	0	0.0003	0.0770511	0.267921	0	0.0213333	0	0.0470425	0.08	0.0956727	1.07143
H376.X.52.MD	H376.X.52	19 yrs	F	stage6	0	0	0.515224	0	0.103614	0	0.0428347	0	0	0	0.0244971	0.17129	0	0.0122947	0	0.130245	0.07	0.102156	1.04372
H376.XI.60.AMY	H376.XI.60	21 yrs	F	stage6	0.0972129	0	0.525272	0.096913	0.150116	0	0	0.0118257	0	0	0.00980352	0.090186	0	0.00703774	0	0.0116338	0.02	0.246355	0.986564
H376.XI.60.STC	H376.XI.60	21 yrs	F	stage6	0.054975	0	0.619706	0.0705095	0.112135	0	0.0197694	0	0.0129905	0	0.0189416	0.0842187	0	0.00675478	0	0	0.03	0.211163	1.00134
H376.XI.60.MFC	H376.XI.60	21 yrs	F	stage6	0.134964	0	0.443135	0.164267	0.0787808	0	0.0227278	0	0	0.0191301	0.0314989	0.0990394	0	0.00597183	0.0005	0	0.02	0.218351	0.997705
H376.XI.60.DFC	H376.XI.60	21 yrs	F	stage6	0.115997	0	0.511766	0.150525	0.0579455	0	0.00703392	0.00848119	0	0.0138152	0.0122749	0.108698	0	0.0132542	0.0002	0	0.03	0.206223	1.00238
H376.XI.60.OFC	H376.XI.60	21 yrs	F	stage6	0.0980226	0	0.576424	0.0633425	0.143482	0	0	0	0	0	0.0134877	0.0912412	0	0.0139997	0	0	0.02	0.218393	0.999049
H376.XI.60.ITC	H376.XI.60	21 yrs	F	stage6	0.10033	0	0.566579	0.0945782	0.157174	0	0	0	0.0106205	0	0	0.0633232	0	0.00701518	0.0004	0	0.01	0.294951	0.966715
H376.XI.60.HIP	H376.XI.60	21 yrs	F	stage6	0.161388	0	0.413578	0.141306	0.104443	0	0.00570739	0	0	0.0117167	0.0170197	0.120261	0	0.0107738	0.0048521	0.00895475	0.02	0.235022	0.990792
H376.XI.60.VFC	H376.XI.60	21 yrs	F	stage6	0.064737	0	0.627266	0.0679343	0.137824	0	0	0.00318334	0	0	0.0172792	0.0764166	0	0.00536013	0	0	0.02	0.231687	0.993221
H376.XI.60.A1C	H376.XI.60	21 yrs	F	stage6	0.0998944	0	0.583199	0.107333	0.0786153	0	0	0	0	0.0146676	0.00558649	0.0848768	0	0.0187918	0.00703517	0	0.02	0.266797	0.977092
H376.XI.60.V1C	H376.XI.60	21 yrs	F	stage6	0.0535643	0	0.631869	0.123794	0.0610156	0	0	0	0	0.0165319	0.0103531	0.0889033	0	0.0136154	0.0004	0	0.01	0.28708	0.968176
H376.XI.60.STR	H376.XI.60	21 yrs	F	stage6	0.108563	0	0.476061	0	0.068014	0	0.0808358	0	0.0168601	0	0.0424047	0.207261	0	0	0	0	0.07	0.102988	1.05371
H376.XI.60.M1C	H376.XI.60	21 yrs	F	stage6	0.0931992	0	0.549155	0.132229	0.0474836	0	0.0127281	0	0	0.0104483	0.00671961	0.122082	0	0.0243356	0.00161959	0	0.03	0.197069	1.00676
H376.XI.60.IPC	H376.XI.60	21 yrs	F	stage6	0.0960892	0	0.527447	0.167737	0.0550019	0	0.0120087	0	0	0.0184956	0.0168889	0.0919526	0	0.0127559	0.00162349	0	0.01	0.295896	0.96416
H376.XI.60.S1C	H376.XI.60	21 yrs	F	stage6	0.0844225	0	0.591014	0.105301	0.0803996	0	0	0.00638489	0	0.0153689	0.0087667	0.090351	0	0.0179911	0	0	0.02	0.267773	0.976646
H376.XI.60.CBC	H376.XI.60	21 yrs	F	stage6	0.0340179	0	0.321758	0.0304233	0.111376	0	0.0720796	0	0	0.0179132	0.07466	0.239522	0	0.00221114	0	0.096038	0.07	0.101333	1.06236
H376.XI.60.MD	H376.XI.60	21 yrs	F	stage6	0	0	0.565997	0	0.122127	0	0.06839	0	0	0.01805	0.0409645	0.149195	0	0	0	0.0352776	0.16	0.0586716	1.06452
H376.XI.50.AMY	H376.XI.50	23 yrs	M	stage6	0	0	0.656692	0	0.0755856	0	0.073252	0.00490204	0	0.0251848	0.0322321	0.128194	0	0	0	0.00394683	0.03	0.139794	1.03077
H376.XI.50.STC	H376.XI.50	23 yrs	M	stage6	0.123296	0	0.579906	0.0575195	0.0779823	0	0.00961227	0	0	0.0105334	0.0244663	0.108675	0	0.00800932	0	0	0.02	0.221727	0.995824
H376.XI.50.MFC	H376.XI.50	23 yrs	M	stage6	0.0296684	0	0.63291	0.0616923	0.0681596	0	0.0533827	0	0.0215427	0	0.0138395	0.108847	0	0.00718572	0	0.00277212	0.02	0.217547	0.998141
H376.XI.50.DFC	H376.XI.50	23 yrs	M	stage6	0.134764	0	0.486901	0.151613	0.046686	0	0.00955564	0	0	0.0187942	0.0156868	0.11934	0	0.0159645	0.0007	0	0.02	0.246371	0.985545
H376.XI.50.OFC	H376.XI.50	23 yrs	M	stage6	0.119991	0	0.555461	0.0834684	0.063206	0	0.0150362	0	0	0.0116394	0.0300283	0.112447	0	0.00872271	0	0	0.02	0.251051	0.983224
H376.XI.50.ITC	H376.XI.50	23 yrs	M	stage6	0.114943	0	0.488321	0.121239	0.0787323	0	0.0169322	0	0	0.0183986	0.0141468	0.115513	0	0.0133452	0.0007	0.0177295	0.02	0.234569	0.990249
H376.XI.50.HIP	H376.XI.50	23 yrs	M	stage6	0.0394365	0	0.634478	0.00261787	0.081172	0	0.0346177	0.00587368	0	0.0146076	0.030313	0.145851	0	0.00667841	0.00435433	0	0.03	0.188102	1.01094
H376.XI.50.VFC	H376.XI.50	23 yrs	M	stage6	0.12046	0	0.544623	0.0993746	0.057372	0	0.00942695	0	0	0.0182922	0.0227168	0.115844	0	0.0112922	0.0006	0	0.03	0.209618	1.00085
H376.XI.50.A1C	H376.XI.50	23 yrs	M	stage6	0.113022	0	0.599294	0.0357951	0.0881427	0	0	0	0	0.0191216	0.0200403	0.114462	0	0.00893697	0.00118519	0	0.02	0.224143	0.994984
H376.XI.50.V1C	H376.XI.50	23 yrs	M	stage6	0.0458848	0	0.61093	0.053802	0.0988671	0	0.0362866	0	0.0261182	0	0.00563645	0.113383	0	0.0052294	0	0.00386269	0.02	0.243175	0.987575
H376.XI.50.STR	H376.XI.50	23 yrs	M	stage6	0.0633169	0	0.588106	0	0.0137783	0	0.0514873	0	0.0161532	0	0.0369814	0.183701	0	0	0	0.0464755	0.03	0.151314	1.0263
H376.XI.50.M1C	H376.XI.50	23 yrs	M	stage6	0.0350758	0	0.658005	0.0436116	0.0592409	0	0.0245231	0	0.0344123	0	0.0243245	0.106214	0	0.0142434	0	0.0003	0.03	0.185575	1.01148
H376.XI.50.IPC	H376.XI.50	23 yrs	M	stage6	0.0231889	0	0.688179	0.0561418	0.0775405	0	0.0345391	0	0.0140011	0	0.00384213	0.0841052	0	0.0184623	0	0	0.02	0.260773	0.980416
H376.XI.50.S1C	H376.XI.50	23 yrs	M	stage6	0.0573591	0	0.59171	0.0789063	0.107687	0	0.008899	0	0.019708	0	0.00625129	0.113659	0	0.0158207	0	0	0.02	0.245052	0.987061
H376.XI.50.CBC	H376.XI.50	23 yrs	M	stage6	0	0	0.442385	0	0.115625	0	0.0492794	0.0150382	0	0.028299	0.0640899	0.223593	0	0	0	0.0616903	0.12	0.077154	1.0687
H376.XI.50.MD	H376.XI.50	23 yrs	M	stage6	0	0	0.643253	0	0.00115554	0	0.0367221	0.0088789	0	0	0.0459913	0.17985	0	0.0155908	0	0.0685581	0.21	0.0441702	1.06813
H376.XI.52.AMY	H376.XI.52	30 yrs	F	stage6	0.160435	0	0.379092	0.144974	0.130843	0	0.0167357	0	0	0	0.041076	0.113225	0	0.00192311	0	0.0116959	0.02	0.248553	0.985135
H376.XI.52.STC	H376.XI.52	30 yrs	F	stage6	0.0571812	0	0.651827	0.060515	0.134723	0	0	0	0	0	0.0153902	0.0776597	0	0.00270362	0	0	0.02	0.215521	1.00014
H376.XI.52.MFC	H376.XI.52	30 yrs	F	stage6	0.0932025	0	0.517536	0.0892341	0.139693	0	0	0	0.0107375	0	0.0372964	0.105549	0	0	0	0.00675176	0.03	0.158779	1.0225
H376.XI.52.DFC	H376.XI.52	30 yrs	F	stage6	0.0698775	0	0.597401	0.0626755	0.147071	0	0	0	0.0291022	0	0.0206644	0.0570619	0	0.0008	0	0.015314	0.03	0.207051	1.00286
H376.XI.52.OFC	H376.XI.52	30 yrs	F	stage6	0.0991164	0	0.569741	0.0766549	0.117157	0	0	0	0.0101929	0	0.0299927	0.0861561	0	0.00952817	0.00146113	0	0.03	0.174675	1.01614
H376.XI.52.ITC	H376.XI.52	30 yrs	F	stage6	0.0933662	0	0.581228	0.0753499	0.130334	0	0	0	0.0022195	0	0.0277655	0.0891131	0	0	0.0006	0	0.03	0.196409	1.00721
H376.XI.52.HIP	H376.XI.52	30 yrs	F	stage6	0.131908	0	0.4411	0.052059	0.115192	0	0.0115818	0.00982933	0	0	0.0481203	0.161339	0	0.0017151	0	0.0271549	0.03	0.20552	1.00316
H376.XI.52.VFC	H376.XI.52	30 yrs	F	stage6	0.0381525	0	0.643081	0.0469347	0.0904125	0	0	0.00465075	0.0239001	0	0.0304234	0.106176	0	0	0	0.0162684	0.03	0.163134	1.01905
H376.XI.52.A1C	H376.XI.52	30 yrs	F	stage6	0.0248369	0	0.681785	0.0575761	0.0723371	0	0.00138072	0.00300529	0.036645	0	0.0148984	0.0968721	0	0.0106629	0	0	0.03	0.156184	1.02338
H376.XI.52.V1C	H376.XI.52	30 yrs	F	stage6	0.0205381	0	0.695499	0.0498978	0.119166	0	0	0	0	0	0.00283252	0.0929457	0	0.0180043	0.0011162	0	0.03	0.209392	1.00289
H376.XI.52.STR	H376.XI.52	30 yrs	F	stage6	0.0855931	0	0.49546	0	0.10509	0	0.0510116	0	0	0	0.0513849	0.185847	0	0	0	0.0256136	0.05	0.115104	1.04358
H376.XI.52.M1C	H376.XI.52	30 yrs	F	stage6	0.0610375	0	0.605233	0.0881729	0.119566	0	0	0	0.0162192	0	0.0272933	0.0783389	0	0.00413875	0	0	0.03	0.189151	1.01026
H376.XI.52.IPC	H376.XI.52	30 yrs	F	stage6	0.0796924	0	0.615398	0.0695557	0.130981	0	0	0.00287337	0	0	0.0179381	0.0755765	0	0.00426864	0.00371632	0	0.03	0.203529	1.00488
H376.XI.52.S1C	H376.XI.52	30 yrs	F	stage6	0.0502171	0	0.647592	0.0660123	0.13072	0	0	0	0	0	0.0237074	0.0773042	0	0.00444665	0	0	0.03	0.201194	1.00584
H376.XI.52.CBC	H376.XI.52	30 yrs	F	stage6	0	0	0.387601	0	0.131809	0	0.0774543	0	0	0	0.0689687	0.243617	0	0.00335408	0	0.0871953	0.12	0.07791	1.071
H376.XI.52.MD	H376.XI.52	30 yrs	F	stage6	0	0	0.541537	0	0.131159	0	0.0338658	0	0	0.0119452	0.0438667	0.160593	0	0	0	0.0770328	0.14	0.0751134	1.05585
H376.XI.53.AMY	H376.XI.53	36 yrs	M	stage6	0.105709	0	0.51495	0.021045	0.124452	0	0.0213021	0.00451001	0	0	0.0366276	0.158155	0	0.0107288	0	0.00252046	0.02	0.220788	0.998115
H376.XI.53.STC	H376.XI.53	36 yrs	M	stage6	0.0814153	0	0.623046	0.0691753	0.125936	0	0.00531119	0	0	0	0.0138502	0.0716003	0	0.00960824	0.0001	0	0.01	0.281162	0.971904
H376.XI.53.MFC	H376.XI.53	36 yrs	M	stage6	0.0770178	0	0.615729	0.0708194	0.123251	0	0	0	0.0004	0	0.00944357	0.0822009	0	0.00939189	0	0.0117872	0.01	0.28904	0.967783
H376.XI.53.DFC	H376.XI.53	36 yrs	M	stage6	0.0586741	0	0.6396	0.0613728	0.127111	0	0.0137663	0	0	0	0.0135773	0.078149	0	0.00675964	0.001	0	0.01	0.300893	0.963099
H376.XI.53.OFC	H376.XI.53	36 yrs	M	stage6	0.073862	0	0.613891	0.0750061	0.1108	0	0.0261882	0	0	0	0.0193936	0.0808117	0	0	0	0	0.01	0.319181	0.954649
H376.XI.53.ITC	H376.XI.53	36 yrs	M	stage6	0.120555	0	0.483054	0.168486	0.0504532	0	0.0177092	0	0	0.0163835	0.0169179	0.110002	0	0.0154425	0.001	0	0.01	0.288235	0.967527
H376.XI.53.HIP	H376.XI.53	36 yrs	M	stage6	0.0497587	0	0.55495	0.0760714	0.0803836	0	0.0217193	0.0001	0.00507337	0	0.0466284	0.133677	0	0	0	0.0316284	0.02	0.263806	0.976941
H376.XI.53.VFC	H376.XI.53	36 yrs	M	stage6	0.0567298	0	0.635837	0.068282	0.117972	0	0.0262198	0	0	0	0.0183185	0.0729574	0	0.00145298	0	0.00223092	0.01	0.325831	0.951898
H376.XI.53.A1C	H376.XI.53	36 yrs	M	stage6	0.0622128	0	0.621768	0.0702583	0.126061	0	0.0163087	0	0.00584499	0	0.0109602	0.0807433	0	0.0058432	0	0	0.01	0.315736	0.956445
H376.XI.53.V1C	H376.XI.53	36 yrs	M	stage6	0.0919308	0	0.589437	0.134332	0.0513957	0	0	0	0	0.0120207	0.0152495	0.0933134	0	0.0123208	0	0	0.01	0.291098	0.966166
H376.XI.53.STR	H376.XI.53	36 yrs	M	stage6	0.118758	0	0.506845	0	0.00851516	0	0.0815514	0	0	0	0.0660296	0.180355	0	0	0	0.0379462	0.03	0.168006	1.01986
H376.XI.53.M1C	H376.XI.53	36 yrs	M	stage6	0.0489803	0	0.661292	0.0626164	0.0939384	0	0.0205794	0	0.0161865	0	0.00613942	0.0769575	0	0.00662638	0	0.00668372	0.01	0.296034	0.964678
H376.XI.53.IPC	H376.XI.53	36 yrs	M	stage6	0.0644987	0	0.639502	0.0754639	0.109065	0	0.00839017	0	0	0	0.0194302	0.0720006	0	0.00964739	0.00200193	0	0.01	0.311232	0.958248
H376.XI.53.S1C	H376.XI.53	36 yrs	M	stage6	0.0718375	0	0.633456	0.0726804	0.1262	0	0	0	0	0	0.00977028	0.0725659	0	0.01349	0	0	0.01	0.305372	0.961306
H376.XI.53.CBC	H376.XI.53	36 yrs	M	stage6	0	0	0.392032	0	0.127531	0	0.0586728	0	0	0.00151649	0.0979657	0.23033	0	0	0	0.0919517	0.14	0.0731813	1.07202
H376.XI.53.MD	H376.XI.53	36 yrs	M	stage6	0	0	0.542108	0	0.0870906	0	0.0472674	0	0	0.00546615	0.0310181	0.183498	0	0.0108343	0	0.0927176	0.12	0.0771257	1.05622
H376.XI.54.AMY	H376.XI.54	37 yrs	M	stage6	0.161071	0	0.445696	0.125879	0.0970459	0	0.00867942	0	0	0.00933774	0.0351975	0.110547	0	0.00501326	0.00153364	0	0.02	0.257912	0.980681
H376.XI.54.STC	H376.XI.54	37 yrs	M	stage6	0.0521452	0	0.631271	0.0846624	0.10006	0	0.0004	0	0.0133988	0	0.0209779	0.0880523	0	0.0089888	0	0	0.03	0.202652	1.0044
H376.XI.54.MFC	H376.XI.54	37 yrs	M	stage6	0.154443	0	0.363506	0.256891	0.0867654	0	0	0	0	0.00928868	0.0313113	0.0898444	0	0.00573726	0.00221283	0	0.01	0.336078	0.946751
H376.XI.54.DFC	H376.XI.54	37 yrs	M	stage6	0.0678881	0	0.561659	0.173612	0.0490438	0	0	0	0	0.0150482	0.0267274	0.0979601	0	0.00806145	0	0	0.01	0.341481	0.943958
H376.XI.54.OFC	H376.XI.54	37 yrs	M	stage6	0.0833573	0	0.559465	0.128407	0.0642674	0	0.00295611	0	0	0.0109459	0.033267	0.109863	0	0.00747211	0	0	0.01	0.281084	0.970259
H376.XI.54.ITC	H376.XI.54	37 yrs	M	stage6	0.127335	0	0.429717	0.214918	0.0786333	0	0	0	0	0.0174975	0.0232969	0.0951577	0	0.009982	0.00346231	0	0.01	0.318676	0.954295
H376.XI.54.HIP	H376.XI.54	37 yrs	M	stage6	0.101335	0	0.552788	0.11195	0.0513341	0	0.00155375	0	0	0.00294685	0.0461088	0.129336	0	0.00177835	0	0.0009	0.01	0.307009	0.958793
H376.XI.54.VFC	H376.XI.54	37 yrs	M	stage6	0.0996922	0	0.570877	0.143023	0.0293138	0	0	0	0	0.009602	0.0262643	0.110387	0	0.0108404	0	0	0.02	0.264659	0.977105
H376.XI.54.A1C	H376.XI.54	37 yrs	M	stage6	0.0935292	0	0.542827	0.165218	0.0353937	0	0	0	0	0.0203068	0.0248686	0.104332	0	0.0135245	0	0	0.01	0.310919	0.957304
H376.XI.54.V1C	H376.XI.54	37 yrs	M	stage6	0.0335201	0	0.681356	0.0391141	0.0997758	0	0.0109621	0	0.00432755	0	0.00235922	0.108012	0	0.0205731	0	0	0.01	0.288651	0.968196
H376.XI.54.STR	H376.XI.54	37 yrs	M	stage6	0.15768	0	0.450492	0	0.0610539	0	0.0254541	0	0	0	0.0944045	0.168175	0	0	0	0.0427411	0.03	0.167971	1.02003
H376.XI.54.M1C	H376.XI.54	37 yrs	M	stage6	0.0286556	0	0.684199	0.0433064	0.0787348	0	0.047527	0	0.0008	0	0.0141448	0.0917876	0	0.00824183	0	0.00262651	0.02	0.256197	0.981966
H376.XI.54.IPC	H376.XI.54	37 yrs	M	stage6	0.0689481	0	0.620773	0.0847676	0.133104	0	0	0	0	0	0.0122107	0.0713667	0	0.00882979	0	0	0.01	0.287696	0.969192
H376.XI.54.S1C	H376.XI.54	37 yrs	M	stage6	0.1229	0	0.570579	0.0905909	0.0351715	0	0	0	0	0.0143528	0.0257	0.124395	0	0.0163102	0	0	0.02	0.242691	0.986794
H376.XI.54.CBC	H376.XI.54	37 yrs	M	stage6	0.0131709	0	0.397444	0.0569164	0.130632	0	0.0679669	0	0	0.0137183	0.0417844	0.235187	0	0.00305268	0	0.0401276	0.25	0.0351542	1.08805
H376.XI.54.MD	H376.XI.54	37 yrs	M	stage6	0	0	0.537539	0	0.12208	0	0.019565	0.00109891	0	0	0.0459626	0.155214	0	0	0	0.118541	0.14	0.0693579	1.05444
H376.XI.56.AMY	H376.XI.56	40 yrs	F	stage6	0.0450352	0	0.594182	0.0349305	0.0703199	0	0.0702467	0	0	0	0.031507	0.106312	0	0.00858749	0	0.0388796	0.03	0.185331	1.0097
H376.XI.56.STC	H376.XI.56	40 yrs	F	stage6	0.0461686	0	0.680579	0.0511324	0.136654	0	0.0133166	0	0	0	0.00967988	0.0518544	0	0.00706034	0.0035547	0	0.01	0.288802	0.969472
H376.XI.56.MFC	H376.XI.56	40 yrs	F	stage6	0.0661995	0	0.640186	0.0699975	0.135696	0	0	0	0.00990726	0	0.00411555	0.0637547	0	0.00854515	0.00159768	0	0.01	0.284542	0.970805
H376.XI.56.DFC	H376.XI.56	40 yrs	F	stage6	0.0861674	0	0.614095	0.063696	0.144505	0	0	0	0.0147393	0	0	0.0554432	0	0.0168645	0.00448968	0	0.01	0.276078	0.974954
H376.XI.56.OFC	H376.XI.56	40 yrs	F	stage6	0.123245	0	0.512078	0.188108	0.0449383	0	0	0	0	0.014694	0.0106738	0.0910864	0	0.013054	0.00212172	0	0.01	0.29682	0.963732
H376.XI.56.ITC	H376.XI.56	40 yrs	F	stage6	0.0915152	0	0.58255	0.0747752	0.121309	0	0.0104991	0	0	0	0.013133	0.0965883	0	0.00962997	0	0	0.01	0.284896	0.969762
H376.XI.56.HIP	H376.XI.56	40 yrs	F	stage6	0.106194	0	0.569867	0.0269657	0.13985	0	0.0197273	0	0	0.0276872	0.00929089	0.0872896	0	0.00104613	0	0.0120822	0.02	0.244107	0.987064
H376.XI.56.VFC	H376.XI.56	40 yrs	F	stage6	0.116404	0	0.536513	0.178177	0.029625	0	0	0	0	0.0139112	0.0123922	0.0981498	0	0.0142807	0.0005	0	0.01	0.313456	0.956302
H376.XI.56.A1C	H376.XI.56	40 yrs	F	stage6	0.102753	0	0.618188	0.00320576	0.153772	0	0.0145358	0	0	0.0102613	0.012902	0.0805072	0	0.0005	0	0.00333829	0.02	0.245379	0.98733
H376.XI.56.V1C	H376.XI.56	40 yrs	F	stage6	0.0260026	0	0.729664	0.0338494	0.119703	0	0	0	0.00891209	0	0.0032288	0.0626636	0	0.0159766	0	0	0.01	0.303978	0.962274
H376.XI.56.STR	H376.XI.56	40 yrs	F	stage6	0.143647	0	0.445185	0	0.0585366	0	0.0812071	0	0	0	0.0556721	0.186439	0	0	0	0.0293136	0.04	0.122719	1.04056
H376.XI.56.M1C	H376.XI.56	40 yrs	F	stage6	0.0692441	0	0.696589	0.0143108	0.0963688	0	0	0	0.0511732	0	0	0.0664692	0	0.00584524	0	0	0.02	0.250678	0.984448
H376.XI.56.IPC	H376.XI.56	40 yrs	F	stage6	0.128538	0	0.594698	0.104246	0.0741471	0	0.00528803	0	0	0	0.00242887	0.0800374	0	0.0106163	0	0	0.01	0.325783	0.951707
H376.XI.56.S1C	H376.XI.56	40 yrs	F	stage6	0.0671394	0	0.670008	0.0260661	0.126752	0	0	0	0.0342554	0	0	0.055247	0	0.0197325	0.0008	0	0.02	0.219742	0.998957
H376.XI.56.CBC	H376.XI.56	40 yrs	F	stage6	0.0386319	0	0.536001	0.029312	0.0617065	0	0	0.0159311	0	0.0163082	0.0311479	0.234979	0	0.00228158	0.0337001	0	0.37	0.0127935	1.09419
H376.XI.56.MD	H376.XI.56	40 yrs	F	stage6	0	0	0.546169	0	0.112653	0	0.0258787	0.0114203	0	0.0115352	0.0223059	0.18926	0	0.00369272	0	0.0770863	0.14	0.0723755	1.05869
