# Supplementary material for: Gene expression imputation and cell-type deconvolution in human brain with spatiotemporal precision and its implications for brain-related disorders
Source: HighWire-hosted journal article supplement (doi:10.1101/gr.265769.120), 2020-12-03
Supplement: Supplemental_Table_S4.xlsx [file Supplemental_Table_S4.xlsx]

## Sheet: Table S4
Supplemental Table S4. GO and KEGG pathway enrichment analysis for 16 neuronal subtypes specific expressed genes.
Neuronal_subtype	Reference category	Term	Count	PValue	FDR
Ex1	GOTERM_CC_DIRECT	GO:0014069~postsynaptic density	13	3.78667e-06	4.99844e-05
Ex1	GOTERM_BP_DIRECT	GO:0000226~microtubule cytoskeleton organization	9	4.00183e-06	6.53385e-05
Ex1	GOTERM_CC_DIRECT	GO:0005737~cytoplasm	97	1.0704e-05	0.000141288
Ex1	GOTERM_MF_DIRECT	GO:0004674~protein serine/threonine kinase activity	17	3.00279e-05	0.000416103
Ex1	GOTERM_CC_DIRECT	GO:0043197~dendritic spine	9	3.79224e-05	0.000500475
Ex1	GOTERM_BP_DIRECT	GO:0048167~regulation of synaptic plasticity	6	5.56675e-05	0.000908533
Ex1	GOTERM_MF_DIRECT	GO:0005524~ATP binding	38	7.9993e-05	0.00110812
Ex1	KEGG_PATHWAY	hsa04024:cAMP signaling pathway	11	0.000134373	0.00164768
Ex1	GOTERM_MF_DIRECT	GO:0005515~protein binding	140	0.000213461	0.00295449
Ex1	GOTERM_MF_DIRECT	GO:0003779~actin binding	13	0.000263328	0.00364352
Ex1	GOTERM_CC_DIRECT	GO:0048471~perinuclear region of cytoplasm	20	0.000334939	0.00441229
Ex1	GOTERM_BP_DIRECT	GO:0006468~protein phosphorylation	17	0.000348474	0.00567461
Ex1	KEGG_PATHWAY	hsa04921:Oxytocin signaling pathway	9	0.000455204	0.00557161
Ex1	GOTERM_BP_DIRECT	GO:0007165~signal transduction	30	0.000606637	0.00985906
Ex1	GOTERM_CC_DIRECT	GO:0005886~plasma membrane	74	0.000741636	0.0097457
Ex1	GOTERM_MF_DIRECT	GO:0004672~protein kinase activity	14	0.000786597	0.0108472
Ex1	GOTERM_BP_DIRECT	GO:0048013~ephrin receptor signaling pathway	7	0.000928665	0.0150555
Ex1	GOTERM_CC_DIRECT	GO:0045211~postsynaptic membrane	10	0.0014342	0.0187672
Ex1	KEGG_PATHWAY	hsa04020:Calcium signaling pathway	9	0.00145115	0.0176625
Ex1	GOTERM_BP_DIRECT	GO:0018107~peptidyl-threonine phosphorylation	5	0.00149245	0.0240915
Ex1	GOTERM_BP_DIRECT	GO:0035556~intracellular signal transduction	14	0.0026084	0.0417482
Ex1	KEGG_PATHWAY	hsa04022:cGMP-PKG signaling pathway	8	0.00304024	0.036675
Ex1	GOTERM_MF_DIRECT	GO:0005516~calmodulin binding	9	0.00313133	0.0425368
Ex1	KEGG_PATHWAY	hsa05132:Salmonella infection	6	0.00331755	0.0399579
Ex1	KEGG_PATHWAY	hsa04510:Focal adhesion	9	0.00349578	0.0420625
Ex1	KEGG_PATHWAY	hsa04810:Regulation of actin cytoskeleton	9	0.00393031	0.0471758
Ex1	GOTERM_BP_DIRECT	GO:0030168~platelet activation	7	0.00406624	0.064363
Ex1	GOTERM_MF_DIRECT	GO:0016301~kinase activity	10	0.00409735	0.0553166
Ex1	KEGG_PATHWAY	hsa04611:Platelet activation	7	0.00494826	0.0590564
Ex1	GOTERM_BP_DIRECT	GO:0048511~rhythmic process	5	0.00543389	0.0851222
Ex1	KEGG_PATHWAY	hsa04713:Circadian entrainment	6	0.0059088	0.070142
Ex1	GOTERM_BP_DIRECT	GO:0018105~peptidyl-serine phosphorylation	7	0.00608932	0.0949168
Ex1	GOTERM_CC_DIRECT	GO:0005829~cytosol	58	0.00666279	0.0844641
Ex1	KEGG_PATHWAY	hsa04070:Phosphatidylinositol signaling system	6	0.00673178	0.0795445
Ex1	GOTERM_CC_DIRECT	GO:0005856~cytoskeleton	12	0.00743493	0.0938139
Ex1	GOTERM_CC_DIRECT	GO:0016323~basolateral plasma membrane	8	0.00780741	0.0982925
Ex1	KEGG_PATHWAY	hsa04720:Long-term potentiation	5	0.00839681	0.0983008
Ex2	GOTERM_CC_DIRECT	GO:0005622~intracellular	21	0.00698069	0.0823711
Ex2	GOTERM_CC_DIRECT	GO:0005929~cilium	6	0.00850397	0.0994959
Ex3	GOTERM_CC_DIRECT	GO:0005829~cytosol	63	4.26011e-06	5.60111e-05
Ex3	GOTERM_MF_DIRECT	GO:0005515~protein binding	123	0.000117169	0.00164854
Ex3	GOTERM_MF_DIRECT	GO:0019901~protein kinase binding	12	0.00308487	0.0425712
Ex3	GOTERM_CC_DIRECT	GO:0070062~extracellular exosome	46	0.00375101	0.0482107
Ex3	GOTERM_MF_DIRECT	GO:0046982~protein heterodimerization activity	13	0.00551704	0.0749415
Ex3	GOTERM_MF_DIRECT	GO:0003774~motor activity	5	0.00604405	0.0818202
Ex4	GOTERM_MF_DIRECT	GO:0005515~protein binding	125	7.14019e-05	0.000978164
Ex4	GOTERM_BP_DIRECT	GO:0006351~transcription, DNA-templated	36	0.00227199	0.0354515
Ex6	GOTERM_MF_DIRECT	GO:0005515~protein binding	99	0.000147837	0.00195514
Ex7	GOTERM_CC_DIRECT	GO:0005737~cytoplasm	66	0.00185912	0.0232536
Ex7	GOTERM_MF_DIRECT	GO:0016301~kinase activity	9	0.00213446	0.0279025
Ex7	GOTERM_CC_DIRECT	GO:0030054~cell junction	12	0.00313596	0.0389345
Ex8	GOTERM_CC_DIRECT	GO:0005829~cytosol	53	0.000663875	0.00851824
In1	GOTERM_MF_DIRECT	GO:0005515~protein binding	84	0.00159118	0.0208809
In1	GOTERM_BP_DIRECT	GO:0098609~cell-cell adhesion	8	0.00418096	0.0628974
In1	GOTERM_CC_DIRECT	GO:0015629~actin cytoskeleton	7	0.00532906	0.0645722
In2	GOTERM_CC_DIRECT	GO:0005654~nucleoplasm	59	6.50424e-06	8.42786e-05
In2	GOTERM_MF_DIRECT	GO:0005515~protein binding	143	1.38599e-05	0.000192661
In2	GOTERM_MF_DIRECT	GO:0003730~mRNA 3'-UTR binding	6	0.000378519	0.00524928
In2	GOTERM_BP_DIRECT	GO:0075733~intracellular transport of virus	6	0.000429272	0.00690075
In2	GOTERM_CC_DIRECT	GO:0031982~vesicle	8	0.000816737	0.0105317
In2	GOTERM_BP_DIRECT	GO:0006396~RNA processing	7	0.00136835	0.0218415
In2	GOTERM_CC_DIRECT	GO:0005829~cytosol	58	0.00152372	0.0195654
In2	GOTERM_BP_DIRECT	GO:0007077~mitotic nuclear envelope disassembly	5	0.00218161	0.0346098
In2	GOTERM_CC_DIRECT	GO:0005634~nucleus	84	0.00309075	0.039318
In2	GOTERM_CC_DIRECT	GO:0005737~cytoplasm	81	0.0039285	0.0497268
In2	GOTERM_CC_DIRECT	GO:0005681~spliceosomal complex	6	0.00512157	0.0643705
In2	GOTERM_CC_DIRECT	GO:0005743~mitochondrial inner membrane	13	0.00627892	0.0783767
In3	GOTERM_CC_DIRECT	GO:0005737~cytoplasm	82	0.000242463	0.00315114
In3	GOTERM_MF_DIRECT	GO:0044822~poly(A) RNA binding	27	0.000392345	0.00542828
In3	GOTERM_BP_DIRECT	GO:0006977~DNA damage response, signal transduction by p53 class mediator resulting in cell cycle arrest	6	0.000741867	0.0117898
In3	GOTERM_CC_DIRECT	GO:0005829~cytosol	56	0.0008293	0.01074
In3	GOTERM_CC_DIRECT	GO:0016020~membrane	39	0.00322819	0.0412108
In3	GOTERM_CC_DIRECT	GO:0005654~nucleoplasm	46	0.00463725	0.0587023
In4	GOTERM_BP_DIRECT	GO:0007417~central nervous system development	6	0.00470988	0.0717611
In6	GOTERM_CC_DIRECT	GO:0005739~mitochondrion	32	1.05674e-07	1.36127e-06
In6	GOTERM_CC_DIRECT	GO:0005743~mitochondrial inner membrane	18	1.39049e-07	1.7912e-06
In6	GOTERM_CC_DIRECT	GO:0005829~cytosol	55	1.61948e-07	2.08617e-06
In6	KEGG_PATHWAY	hsa01100:Metabolic pathways	31	1.09685e-06	1.31131e-05
In6	GOTERM_CC_DIRECT	GO:0043209~myelin sheath	10	4.70146e-06	6.05614e-05
In6	GOTERM_BP_DIRECT	GO:0006099~tricarboxylic acid cycle	6	5.48977e-06	8.65998e-05
In6	KEGG_PATHWAY	hsa00190:Oxidative phosphorylation	10	7.77481e-06	9.29469e-05
In6	KEGG_PATHWAY	hsa01130:Biosynthesis of antibiotics	12	9.27119e-06	0.000110835
In6	KEGG_PATHWAY	hsa00020:Citrate cycle (TCA cycle)	6	1.18446e-05	0.000141598
In6	KEGG_PATHWAY	hsa05012:Parkinson's disease	10	1.32541e-05	0.000158446
In6	KEGG_PATHWAY	hsa01200:Carbon metabolism	9	1.8596e-05	0.0002223
In6	KEGG_PATHWAY	hsa04932:Non-alcoholic fatty liver disease (NAFLD)	10	2.17432e-05	0.000259917
In6	KEGG_PATHWAY	hsa05016:Huntington's disease	11	2.3841e-05	0.000284991
In6	GOTERM_BP_DIRECT	GO:0022904~respiratory electron transport chain	5	2.72144e-05	0.000429232
In6	GOTERM_BP_DIRECT	GO:0006094~gluconeogenesis	6	4.50391e-05	0.000710273
In6	KEGG_PATHWAY	hsa05010:Alzheimer's disease	10	5.06542e-05	0.000605423
In6	KEGG_PATHWAY	hsa00010:Glycolysis / Gluconeogenesis	6	0.000597209	0.00711655
In6	GOTERM_BP_DIRECT	GO:0006120~mitochondrial electron transport, NADH to ubiquinone	5	0.000972131	0.0152261
In6	GOTERM_BP_DIRECT	GO:1902600~hydrogen ion transmembrane transport	5	0.00220311	0.0341949
In6	GOTERM_CC_DIRECT	GO:0005759~mitochondrial matrix	9	0.00575177	0.0716132
In6	KEGG_PATHWAY	hsa01230:Biosynthesis of amino acids	5	0.00632275	0.073027
In7	GOTERM_CC_DIRECT	GO:0005654~nucleoplasm	54	0.000238049	0.00310709
In7	GOTERM_MF_DIRECT	GO:0046872~metal ion binding	43	0.000873519	0.0119207
In7	GOTERM_BP_DIRECT	GO:0006351~transcription, DNA-templated	40	0.00190818	0.0304406
In7	GOTERM_CC_DIRECT	GO:0005622~intracellular	29	0.00222124	0.0286479
In7	GOTERM_CC_DIRECT	GO:0005829~cytosol	57	0.00284803	0.0365936
In7	GOTERM_BP_DIRECT	GO:0042787~protein ubiquitination involved in ubiquitin-dependent protein catabolic process	8	0.00306831	0.0485205
In7	KEGG_PATHWAY	hsa01200:Carbon metabolism	7	0.00330564	0.0393545
In7	GOTERM_BP_DIRECT	GO:0043065~positive regulation of apoptotic process	11	0.00444598	0.0695796
In7	GOTERM_BP_DIRECT	GO:0016049~cell growth	5	0.00516714	0.0804282
In8	GOTERM_CC_DIRECT	GO:0005783~endoplasmic reticulum	17	0.00690784	0.0868201
In8	GOTERM_MF_DIRECT	GO:0004386~helicase activity	5	0.010472	0.134146
In8	GOTERM_BP_DIRECT	GO:0006406~mRNA export from nucleus	5	0.0176935	0.252343
In8	KEGG_PATHWAY	hsa03015:mRNA surveillance pathway	5	0.0220096	0.238786
In8	GOTERM_MF_DIRECT	GO:0046872~metal ion binding	31	0.023158	0.274278
In8	GOTERM_MF_DIRECT	GO:0005515~protein binding	102	0.0257176	0.299868
In8	GOTERM_BP_DIRECT	GO:0007417~central nervous system development	5	0.0318767	0.41006
In8	GOTERM_BP_DIRECT	GO:0006811~ion transport	5	0.0380514	0.468454
In8	GOTERM_MF_DIRECT	GO:0003723~RNA binding	11	0.048722	0.495118
In8	GOTERM_MF_DIRECT	GO:0005215~transporter activity	6	0.0522735	0.520307
In8	GOTERM_MF_DIRECT	GO:0019904~protein domain specific binding	6	0.058244	0.560044
In8	GOTERM_CC_DIRECT	GO:0016324~apical plasma membrane	7	0.0648439	0.584553
In8	GOTERM_MF_DIRECT	GO:0008289~lipid binding	5	0.0654506	0.603939
In8	GOTERM_CC_DIRECT	GO:0005764~lysosome	6	0.0688486	0.607269
In8	GOTERM_BP_DIRECT	GO:0006260~DNA replication	5	0.0691341	0.68871
In8	GOTERM_CC_DIRECT	GO:0005730~nucleolus	14	0.0747077	0.638442
In8	GOTERM_BP_DIRECT	GO:0016032~viral process	7	0.0784729	0.735863
In8	GOTERM_BP_DIRECT	GO:0008380~RNA splicing	5	0.0836468	0.759011
In8	GOTERM_CC_DIRECT	GO:0005654~nucleoplasm	35	0.0902268	0.710312
