# Supplementary material for: Gene expression imputation and cell-type deconvolution in human brain with spatiotemporal precision and its implications for brain-related disorders
Source: HighWire-hosted journal article supplement (doi:10.1101/gr.265769.120), 2020-12-03
Supplement: Supplemental_Table_S5.xlsx [file Supplemental_Table_S5.xlsx]

## Sheet: Table S5
Supplemental Table S5. Summary of the 13 brain related GWAS datasets used in this study.
ID	Abbreviation	Traits full name	SNPs number	*TAGs number (p < 0.05)	*TAGs number (p < 0.01)	*TAGs number (p < 0.001)	Author	Year	Consortium
1	ADHD	Attention Deficit Hyperactivity Disorder	7742793	2543	909	261	Demontis	2017	PGC
2	ALC	Alcohol Consumption	11900652	1226	256	25	Liua	2019	23andMe,UKBB, GSCAN
3	ASD	Autism Spectrum Disorder	5751652	1543	351	40	Psychiatric-Genomics-Consortium	2017	PGC
4	BIP	Bipolar Disorder	8958989	3613	1495	443	Stahl	2018	PGC
5	COL	College	2321510	2405	848	237	Rietveld	2013	SSGAC
6	DS	Depressive Symptoms	4982193	1868	540	85	Baselmans	2019	23AndMe, UKHLS
7	EDU	Education Years All	8146469	4888	2404	1025	Okbay	2016	Mike Gloudmann
8	INT	Internalizing Problems	2818244	1098	208	26	Benke	2014	Mike Gloudmann
9	MDD	Major Depressive Disorder	12364546	2697	993	327	Wray	2018	PGC
10	NRT	Neuroticism	4982193	2847	1083	342	Baselmans	2019	23AndMe, UKHLS
11	OCD	Obsessive Compulsive Disorder	8273890	1445	371	52	Arnold	2017	PGC
12	SCZ	Schizophrenia	8171059	5839	3225	1588	Pardinas	2018	PGC + CLOZUK
13	SWB	Subjective Well Being	2268435	1977	612	126	Okbay	2016	Mike Gloudmann
*TAG：Trait associated genes
