# Supplementary material for: Gene expression imputation and cell-type deconvolution in human brain with spatiotemporal precision and its implications for brain-related disorders
Source: HighWire-hosted journal article supplement (doi:10.1101/gr.265769.120), 2020-12-03
Supplement: Supplemental_Table_S6.xlsx [file Supplemental_Table_S6.xlsx]

## Sheet: Tabel_S6_1
Supplemental Table S6. Cell type gene expression signatures used for CIBSERSORT cell type deconvolution analysis based on reference panel A.
Gene expression signature in panel A	Fetal-Microglia	Fetal-IPC	Fetal-Pericytes	Fetal-OPC	Fetal-Endothelial	Fetal-Astrocytes	Fetal-Oligo	Fetal-Trans	Fetal-NEP	Astrocytes	Endothelial	Fetal-quiescent	Fetal-replicating	Microglia	Neurons	OPC	Oligodendrocytes
A2M	2.36529	1.84088	2.45088	1.6657	1.62989	1.47156	1.76761	3.10183	5.63107	1.97928	730.624	3.07583	3.01064	1803.62	1.42383	40.178	2.2428
AASS	67.6466	5.42321	30.2141	1.32088	119.284	3.89423	9.68296	27.6891	2.66147	2138.75	51.2496	1.35908	709.631	1.66967	1.08557	325.604	113.916
ABCF1	24.1557	23.5363	26.7484	16.425	3.79955	26.4003	26.5986	8.66459	1	1	1	1	1	1	1	1	1
ACBD7	1	1	1	1	1	1	1	1	1	160.793	1	1	1	1	1	1	1
ACTL6A	1	79.0198	1	1	1	1.12704	172.864	1	1	1	1	1	1	1	1	1	1
ADAM10	62.8077	6.0805	26.4059	20.2777	14.3211	13.1884	23.4815	4.97851	1.24193	1.04315	1.10583	1.10867	1.09316	1.23562	1.04061	1.11415	1.07822
ADAM28	1.00596	1.00335	1.01162	1.00742	1.00439	1.00432	1.00276	1.02211	1.09879	1.01263	1.0561	1.06489	1.0597	313.943	1.00446	3.70699	1.02852
ADCY1	1.37655	1	1	2.85654	2.97008	1.71723	1.16608	1	1	1	1	15.4315	1	1	1	1	1
ADD2	6.1	24.6583	16.3322	9.37726	11.3344	43.5433	28.827	4.38875	1.01614	1.00278	1.00421	2.9326	1.00479	1.01026	1.0062	1.00393	1.00341
ADORA3	1.00284	1.00276	1.00438	1.00341	1.00281	1.00279	1.00266	1.0058	1.03029	1.00433	1.01897	1.01741	1.01786	378.888	1.00281	1.02974	1.01154
ADRA2A	1.00278	1.00278	1.00272	1.1574	1.38624	1.05593	1.00332	1.00282	1.00409	1.0027	1.00282	35.9608	1.00281	1.0043	1.00265	1.00278	1.00276
AGT	2.18078	1.11363	1.58656	1.35443	1.39609	1.1511	1.03885	1.77705	3.70377	2091.34	2.82184	2.71266	2.73353	5.90117	1.36136	3.06222	2.10804
AHCYL1	3.70377	2.96046	9.46624	5.90621	1.73649	4.33453	2.05217	2.9163	1.00272	1640.52	35.1156	1.00269	2.67961	1.00273	7.83773	25.5778	9.52214
AKAP12	3.85208	7.80861	10.165	3.81654	17.6882	3.51525	9.12112	6.47939	12.9092	15.6441	190.353	7.20391	170.474	1	3.3974	32.7644	1
AKR1A1	5.358	129.876	1.16085	12.618	18.9012	33.0447	687.358	1.86445	1.47013	1.19696	1.26592	1.54067	1.38312	38.5245	1.36338	1.26395	1.58859
ALCAM	1.00212	1.002	1.00213	1.00225	1.00228	1.00201	1.00161	1.00228	1.00229	57.2603	18.7663	1.00227	1.00224	27.8438	10.6255	99.5329	248.954
ALOX5AP	1.66777	1.28699	2.00462	1.76051	1.44846	1.36999	1.10493	2.71327	9.15379	2.10072	5.09011	5.66571	5.67915	1964.45	1.49968	9.45681	3.12452
ALYREF	1.36783	1.249	2.99868	1.25237	1.75505	1.29981	1.44141	5.1523	15.5427	1.11124	1.34865	1.48215	9.87144	1.70441	1.12806	1.25351	1.27471
ANAPC13	1.73649	11.3158	1.70235	118.754	1.87781	26.2238	600.333	3.55793	2.12037	2.62129	1.58233	2.29425	1.66209	2.43432	16.1856	1.67183	1.6261
ANKRD36B	57.5084	90.9775	90.6036	247.176	182.406	202.526	33.1821	55.9369	144.057	3.80715	6.78262	39.0455	33.2166	1.00493	17.3045	4.06172	6.72036
ANLN	1.69448	3.8766	2.23277	1.37358	1.33537	1.63152	2.24128	4.58777	3.28827	1.30926	2.34089	2.0134	19.9558	3.4958	1.16085	2.46145	448.001
AP3S1	15.5427	5.22823	10.5725	91.9222	18.1111	39.717	2.53355	1.01793	1.00732	1.00281	1.00449	47.7757	1.00637	1.01117	8.04999	37.3559	1.00403
APBB1IP	1.00176	1	1.00185	1.00178	1.00167	1.00143	1	1.00195	1.00212	1.0019	1.00205	1.00207	1.00206	155.87	1.0017	1.00207	1.00197
APEX1	204.164	657.482	50.7674	83.6855	78.0492	317.907	925.206	128.484	43.9657	12.4751	3.6645	50.6853	1.00472	1.00458	19.5303	31.4818	9.24857
APOD	1	1	1	1	1	1	1	1	1	1	179.266	1	1	1	1	2899.62	2635.36
APOLD1	4.90809	1.49297	1.00258	1.00252	1.00245	1.07526	3.70262	1.0026	1.00257	1.00239	1836.65	1.0025	1.0025	1.00257	1.0023	1.00248	1.00244
ARF6	11.4397	2.5569	19.5603	4.13544	1.94963	2.75036	3.70594	5.07375	2.12695	4.01831	57.9377	1297.9	121.354	125.543	7.7999	16.1239	62.4159
ARHGAP29	1.00187	1	1.0019	1.00186	1.00143	1	1	1.002	1.0021	1.00193	87.6601	1.00202	1.00201	1.00212	1.00176	1.00195	1.00192
ARHGDIB	1	1	1	1	1	1	1	1	1	1	1	1	1	243.026	1	1	1
ARMCX1	1.00273	1.00275	1.00271	1.00274	1.00273	1.00272	1.09622	1.00284	1.00404	1.0028	1.00284	1.00329	1.00281	1.00428	1.01169	135.55	1.00277
ARPC2	510.722	207.623	62.0551	634.334	270.397	348.402	493.747	223.361	175.171	12.4396	74.5606	95.1152	23.6554	443.748	32.5122	62.7414	30.0446
ARPC3	44.8064	74.003	17.803	540.161	247.856	112.694	50.5336	23.6035	1	1	24.8806	25.4562	1	170.944	19.6839	5.8357	42.3114
ARPP21	2.59605	1.26975	1.00265	13.0841	1.45882	18.3556	1.17942	1.00276	1.00283	1.00275	1.00277	28.5551	1.00277	1.00283	3.737	1.00281	1.00275
ASPM	1	4.8189	1.55705	1	1	1.71643	4.65255	3.07538	23.4182	1	1	1	1.00167	1.00167	1	1	1
ATAD2	1.35163	3.77864	1.60168	1.46543	1.42383	2.01095	2.66139	2.0721	1.94305	1.0987	9.15704	1.30959	56.2294	1.5739	1.17765	1.36153	1.19439
ATAT1	58.2431	13.246	9.52352	41.706	4.42151	14.3966	8.74804	1.81436	1.31098	1.02429	1.10176	1.10757	1.10694	1.25438	1.00666	1.06522	1.05394
ATF3	1	1	1	1	1	1	1.47796	1	1	1	184.254	1	10.067	10.4635	1	1	4.43597
ATF7IP	12.9974	32.2274	9.5864	45.0695	10.6125	35.819	94.6025	7.45239	1.00611	4.54354	1.0028	1.00439	9.46624	1.00422	1.01134	1.00324	2.08861
ATP13A4	1	1	1	1	1	1	1	1.00153	1.00177	304.457	1.00148	1.00162	1.0016	1.00183	1	28.2959	1
ATP1A2	1.05339	1.00259	4.50366	1.00252	83.8358	1.00254	1.00237	1.00266	1.0027	3637.01	577.6	1.00261	1.00266	1.0027	1.00257	190.647	1.00257
ATP1B1	6.85877	2.20857	1.26376	15.3182	11.5113	5.37548	4.37476	2.86463	7.70655	7.67387	54.0685	24.8184	4.88408	26.2443	2940.19	177.138	900.026
ATP1B2	51.1854	2.44056	13.63	3.46973	95.9849	3.06773	3.69129	1.00274	1.00267	5167.05	126.705	1.00268	43.3168	11.6541	491.616	179.958	1.00266
ATP5C1	961.405	525.985	175.171	606.021	220.439	606.147	387.888	271.499	1	216.282	1	311.979	125.392	43.0579	347.904	78.3266	192.208
ATP5EP2	1.12267	1.16361	1.39997	1.55677	1.22901	1.31007	1.56962	2.17524	2.50399	2.26251	156.003	78.6639	21.0666	233.627	36.6553	12.3522	89.4927
ATP6AP2	11.3942	3.83947	3.28128	14.065	6.24086	24.4176	128.114	4.85921	3.08364	191.273	44.2314	2.98153	2.62176	3.95619	1044.96	79.777	128.725
ATP6V1A	24.8338	6.3648	10.2684	17.8846	6.97849	5.9703	13.2965	2.32412	1.00223	15.7887	13.1471	9.2472	1.00217	1.00224	870.017	270.748	43.611
AXL	2.92795	3.87031	6.58049	1.81779	4.56757	1.49328	3.83166	5.73651	4.57515	2334.95	6.94059	2.48027	3.50819	1096.48	1.33755	1195.42	1.92389
B2M	3020.99	12.2269	293.018	7.23186	935.588	2.5071	10.0591	8.4724	4.69374	180.456	9731.33	2.33619	161.132	5360.96	56.8399	2892.3	1000.22
B3GALNT2	1.0026	1.00257	1.00255	1.00245	1.00244	1.00242	1.00252	1.00261	1.00262	39.197	1.00267	1.00261	45.4867	1.00266	2.89739	1.00263	1.00253
B3GNT1	1.10893	1.08644	1.12894	1.10673	1.03004	1.10323	1.22677	1.21057	1.47203	1.60119	1.36368	1.27157	1.29239	1.59052	131.604	38.4714	1.26741
B3GNT7	1.03177	1.02223	1.05906	1.04666	1.02566	1.02581	1.00451	1.34309	1.42245	1.07013	1.25362	1.27862	1.26376	1.58726	1.03026	241.089	1.16328
B4GALT1	1.00215	1.00225	1.00208	1.00205	1.00196	1.00194	1.10353	1.00221	1.00219	1.00214	6.34282	1.00213	1.00213	390.826	1.00189	1.00213	1.00203
BACH2	1.08992	1.79895	1.7506	3.11924	1.62749	2.69593	2.18578	1.00233	1.00231	1.00213	1.00223	21.7662	1.00224	1.00231	1.00207	1.00229	1.00218
BAG3	1.00231	1.00224	1.00234	1.00225	1.00235	1.00214	1.002	1.00243	1.00245	6.38819	158.112	1.00239	1.00241	1.00248	1.00223	63.8968	1.00236
BAG4	7.20653	7.91733	8.67042	9.34983	16.9351	9.91924	20.5947	6.93216	1.0025	1.00249	1.00247	30.0531	1.00243	8.4923	1213.02	1.00246	7.53855
BASP1	6.49608	5.17277	4.32478	16.5563	7.07563	11.2166	13.0564	5.47961	44.2082	1.69363	2.87558	150.892	57.284	34.0602	47.1081	11.9241	2.30298
BAZ1A	39.5211	16.5027	4.15139	5.91394	1.54092	38.8939	11.9502	3.64214	9.44368	1.00275	18.9053	1.00386	10.3	63.6608	1.00268	1.00374	1.00284
BCAS1	1.00206	1.00177	1.002	1.00198	1.00193	1.00182	1	1.00213	1.00222	1.00203	1.00223	1.00217	1.00217	1.00228	1.00196	12.1956	233.99
BCL10	2.09456	1.62989	2.83817	1.49903	3.38228	1.93279	1.50653	2.31645	1	1	6.39042	1	128.767	48.6867	1	1	1
BCL11A	64.0799	157.159	59.5166	170.453	58.9286	211.2	342.609	49.4066	128.201	1.0018	1.00194	948.497	78.5284	1.00207	1.00219	1.00189	1.00189
BCL2A1	1.00195	1.00177	1.00201	1.00197	1.00189	1.00185	1.00073	1.00208	1.00224	1.00204	1.00217	1.00219	1.00217	504.874	1.00189	1.00221	1.00211
BEX1	3.65571	109.374	10.8488	86.3604	10.1261	269.07	48.7631	23.0696	4.3538	1.00408	1.00364	790.431	51.2848	1.00439	4602.98	301.638	80.5789
BEX2	23.6165	31.4127	1.00284	39.2201	9.01322	105.885	8.32112	1.00887	1.00422	1.00284	1.00434	82.3944	1.00345	1.00453	2242.65	4.54599	56.4996
BEX4	231.389	35.8657	25.4395	29.2644	16.3322	20.1258	23.5968	4.10428	1.00422	48.5295	1.00341	137.946	1.00424	1.00484	2606.06	365.103	537.664
BEX5	1.00274	1.00276	1.00271	1.63758	1.00351	1.00272	1.00249	1.00374	1.00381	1.00275	1.00349	1.00445	1.00284	1.00431	267.75	21.7772	1.00282
BHLHE40	1.27604	1.04034	1.19921	1.08895	1.09102	1.03596	1.00562	1.318	1.66	13.1292	181.94	1.41008	1.43551	1.86297	1.09217	1.40694	1.25369
BHLHE41	1.11401	1.01265	1.07899	1.04889	1.02519	1.01978	1.00445	1.14024	1.4563	44.8872	1.30857	1.30755	1.29831	255.386	4.08211	10.6094	16.5427
BIRC5	1	23.6954	1	1	1	1.60713	17.8533	4.98981	1	1	1	1	1	1	1	1	1
BMPR1B	5.82939	1	1	1	1.09469	1	1	1	1	2044.19	1	1	1	1	1	1	1
BORA	3.29779	2.39519	3.858	2.06153	2.1633	1.8662	1.61196	6.13711	22.6269	2.72292	7.40361	8.24727	7.89513	27.0432	1.83357	4.58286	3.92626
BRD2	34.9775	92.0872	8.50634	20.1355	29.4911	51.0108	24.4153	42.0008	31.8876	3.49938	2.76852	2.48406	2.42744	4.4784	1.25845	1.88774	1.9417
BRD4	3.52205	4.07468	5.24967	2.79374	3.08364	2.93086	3.62222	6.55612	24.7437	2.37566	6.41153	4.14973	3.37412	4.71917	1.94488	2.63129	2.52663
BZW2	2.05027	61.0794	19.2822	85.7353	19.774	275.418	28.3335	27.3795	1	1	1	59.227	1	1	3.20636	1	7.01421
C3	1	1	1	1	1	1	1	1	1	1	1	1	1	380.279	1	2.44822	1
C3AR1	1.53186	1.22478	1.91506	1.61064	1.36338	1.29341	1.08176	2.26654	6.85157	1.88208	4.05811	4.47416	4.48406	1299.39	1.38045	12.0581	2.71994
CA2	1.18467	1	1	1	1	1	1	1	1	132.268	107.385	1	1	1	1	1	2924.66
CALB2	1	1	1	1	1	1	1	1	1	1	1	1	1	1	127.069	1	1
CAMK2N1	9.75882	3.46317	3.82582	9.26813	6.2263	5.36969	1.67374	1.07805	1.10917	25.3446	56.8735	107.325	1.04829	1.07718	558.418	1.04452	496.028
CAPZA2	493.036	100.312	59.9989	203.676	200.406	243.528	214.862	43.8596	8.94841	13.6274	5.4995	77.938	40.4036	140.411	15.0994	49.3675	16.9587
CASP3	1.00269	4.50366	27.3883	3.09149	1.00273	4.03469	3.32464	3.01531	1.00273	1.0027	1.00266	1.00269	19.8363	1.00274	1.00259	1.00268	1.00263
CBWD6	25.65	17.5843	21.2477	21.2758	27.8007	20.4599	13.8948	30.3237	54.3628	1.00164	1.00178	1.00188	1.00184	1.00196	1.31982	1.0018	1.00169
CCDC50	3.63607	2.08986	3.83947	3.38284	2.66651	4.04776	1.89657	1.64904	1.58573	1.35629	1.48936	10.2699	15.1205	18.2585	1.27296	133.713	1.16628
CCDC90B	1.00278	19.5303	3.09376	36.9157	141.513	243.026	11.6643	2.63278	1.00284	1.00276	1.00311	5.23761	1.00281	1.00308	2.69098	1.90026	1.48527
CCK	1	1	1	1	1	1	1	1	1	1	1	1	1	1	774.113	1	1
CCNB2	1	25.484	1	1	1	1	16.8852	1	1	1	1	1	1	1	1	1	1
CCND2	104.447	297.471	160.367	104.792	121.861	224.973	326.414	94.68	322.505	15.2852	58.4532	324.176	917.577	44.1889	96.769	55.0052	1
CCT5	169.71	495.912	19.381	30.2867	104.656	432.882	242.253	138.173	12.0218	1.0025	1.00255	33.7563	242.308	1.0026	14.6863	6.08807	17.7272
CD53	1.00232	1.00222	1.00238	1.00234	1.00229	1.00226	1.00212	1.00241	1.00254	1.00239	1.00249	1.00249	1.00249	1988.88	1.0023	1.00252	1.00245
CD63	672.792	116.727	591.936	193.924	259.87	16.9587	297.8	155.034	1.00263	111.123	468.725	1.00258	1.00262	513.111	70.9824	92.3578	184.658
CD74	1.00233	1.00227	1.00239	1.00234	1.0023	1.00227	1.00213	1.00243	1.00254	1.0024	1.00258	1.0025	1.0025	3669.12	1.00231	11.7595	1.00244
CD83	1.00237	1.00238	1.00247	1.00242	1.00241	1.00237	1.00219	1.00248	1.0026	1.00254	1.00258	1.00255	1.00254	2757.76	1.00238	1.00258	1.00249
CD86	1.00237	1.00227	1.00241	1.00239	1.00233	1.00231	1.00217	1.00246	1.00257	1.00243	1.00253	1.00254	1.00253	364.119	1.00234	1.00254	1.00248
CD9	14.8095	1	1	1	26.0667	1	1	1	1	1	39.8772	1	1	1	1	48.1904	1010.93
CDC20	1	1	1	1	1	1	12.4471	1	1	1	1	1	1	1	1	1	1
CDC25C	2.89513	4.17712	3.35754	2.26854	1.98971	2.23928	2.62141	10.8776	17.3901	2.31962	5.73453	6.59432	7.60968	18.644	1.53289	3.93646	3.71824
CDCA7	1	5.62537	1	1	1	2.28468	52.1763	1	1	1	1	1	1	1	1	1	1
CDCA7L	11.0342	8.12301	29.9464	1	4.01612	2.74695	13.3297	1.15294	1	1	1	1	1	1	1	1	1
CDK1	16.9351	46.2322	1.70378	1.0025	1.00248	6.1048	67.4351	2.37652	43.5601	1.00247	1.00257	1.00258	10.7751	1.00265	1.00239	1.00255	1.00252
CDK2AP1	269.068	15.1633	24.2778	4.49249	8.56418	9.51191	16.2812	5.34817	1.07507	1.03861	1.03405	1.03104	331.738	1.08148	1.00448	65.2329	12.3945
CDK5R1	6.61474	3.92446	2.51007	17.418	4.3127	9.02844	10.1897	3.58745	5.96374	1.84503	3.33088	210.705	8.32625	5.09509	18.4229	2.48249	2.60811
CDKN1A	1	1	1.00149	1	1	1	1	1.00171	1.00196	1.00148	345.487	1.00187	1.00186	102.754	1	1.00186	1.00177
CDR1	39.8981	63.3111	16.7016	18.5345	24.0243	51.3218	21.4117	1.52167	12.1656	1.00257	46.4068	468.723	129.876	1.0027	199.475	460.226	503.552
CDV3	404.367	23.2546	28.532	47.6091	7.80861	52.4324	134.84	13.8071	12.038	1.00259	1.0027	56.8115	33.4515	222.796	1.15776	1.00263	41.7335
CEBPD	1	1	1	1	1	1	1	1	1	1	233.952	1	1	1	1	1	1
CELF2	54.5844	74.003	20.4089	172.205	66.0233	129.299	43.8435	9.35787	40.2431	38.5176	2.30137	490.911	90.1798	60.387	67.0723	12.6874	1.00358
CENPE	1.00225	2.75766	1.00223	1.00223	1.0021	3.69868	6.59548	3.74594	14.8901	1.0021	1.00224	1.00221	9.54732	1.00229	1.00198	1.00215	1.00216
CENPF	3.79005	89.8257	6.46857	1.39628	1.00215	6.55139	62.9289	56.3544	165.201	1.00207	1.00222	1.00225	109.598	1.00229	1.00194	1.00215	1.00215
CEP170	886.291	252.746	72.2504	409.62	241.089	459.386	103.422	34.0921	79.6684	8.85203	1.10502	162.826	21.4476	95.4774	5.99293	7.99842	22.0322
CEP170P1	14.3853	3.15566	1.03774	4.84854	3.96268	4.96551	2.01933	1.67063	1.06565	1.0039	1.01208	1.01462	1.01256	1.03586	1.00278	1.00735	1.00599
CERS5	30.1087	5.13791	89.9965	15.9147	14.8696	9.9995	29.8977	1.16258	1.08142	1.09847	1.03257	1.08484	1.08609	1.11632	2.96596	1.04057	1.03704
CFL2	1.00406	3.81526	26.1943	3.47683	6.79021	1.54294	1.64908	1.01077	1.00592	1.00403	21.7122	1.00441	1.00431	1.00863	5.52076	2.43907	2394.56
CH25H	1.00189	1	1.00184	1.00177	1.00154	1.00073	1	1.00191	1.00209	1.00185	1.00203	1.00203	1.00203	1010.82	1.00158	1.00203	1.00195
CHGB	1.0039	1.00281	1.00284	1.00536	1.00282	1.00388	1.01043	1.00439	1.01641	1.00419	1.00716	1.0126	1.00753	1.02243	62.2967	1.01121	1.00466
CHL1	57.9779	1.09371	3.28827	70.1087	81.7973	40.3208	1.00262	1.02804	1.02377	35.2892	1.01116	103.915	1.01401	1.02529	50.3158	55.9328	1.01047
CKAP2	1	28.8416	36.1471	3.39009	3.92446	25.8411	93.926	24.2317	12.6161	1	1	1	61.67	1	1.67616	1	1
CKS2	1.37312	314.142	37.3684	17.9059	1.26464	86.3716	879.897	193.126	135.138	1.09397	1.43268	1.42672	1596.07	1.65523	1.09047	1.25804	1.18875
CLDN10	1.00232	1.0022	1.00232	1.00226	1.00229	1.00221	1.002	1.00237	1.00245	1426.63	1.00239	1.0024	1.0024	1.00248	1.00226	1.00246	1.00235
CLDN11	1.00222	1.00218	1.00227	1.00225	1.00219	1.00221	1.002	1.00238	1.00244	1.00229	1.46074	1.0024	1.00239	1.00249	1.00225	6.18513	1711.73
CLDND1	131.604	30.7122	53.7238	29.7331	350.663	11.9415	143.031	6.66268	1.00245	1.00246	707.7	1.00243	1.00247	56.8789	5.39007	393.63	6528.71
CLEC7A	1	1	1	1	1	1	1	1	1	1	1	1	1	1199.08	1	1	1
CLU	22.9104	30.5338	114.792	16.3646	165.944	9.80774	22.4786	25.6036	1	6502.67	280.663	1	47.825	1	899.821	23.2799	31.6069
CMTM6	1.119	1.09777	1.00273	1.05307	1.00267	1.00265	1.42807	1.00413	1.00329	1.00282	3.10117	1.00276	1.00279	569.202	1.00271	26.2	1.0027
CNDP1	2.22167	1.21378	1.77725	1.61565	1.35163	1.28528	1.0787	2.27223	6.60816	1.95899	5.1479	4.42676	4.34341	12.4875	1.42623	5.33875	1019.08
CNOT2	107.092	209.142	31.082	185.359	197.62	93.3178	74.2137	68.888	18.9935	2.57506	37.6268	23.1306	30.8142	1	5.93341	7.79877	11.7197
CNOT6	10.6522	1.74146	4.65954	1.53578	2.60344	1.73266	2.05802	1	1	1	1	1	33.3338	1	1	1	1
CNOT7	2.09456	43.8026	23.4182	16.4209	34.5294	70.4538	322.523	19.802	14.177	1	1	18.2232	17.1562	1	5.60844	1	1
CNP	100.312	6.60064	36.9509	4.30356	8.4965	9.42408	39.9331	4.86766	1	43.1416	36.4976	1	49.0314	117.135	9.04426	71.0377	4096.44
CNTN1	1.00259	1.00263	1.00259	2.48045	1.30939	1.49609	1.00243	1.00269	1.00272	46.6332	1.00268	1.00275	1.00266	1.00275	136.008	380.809	3.34581
COBLL1	1.00331	1.00266	1.0028	1.0027	1.00271	1.00262	1.00248	1.00284	1.00422	1.00272	10.0762	1.00282	1.00284	1.0044	1.00267	1.00279	1.00277
COL11A1	1.19164	2.73786	3.90685	1.01422	1.2077	1.9359	1.52912	6.56807	1.10199	11.6266	1.02923	1.02424	141.803	1.0582	1.03535	238.772	1.02227
COMMD10	1.03881	1.31746	1.14305	1.03971	1.18197	1.27378	237.151	1.3141	1.23949	1.06721	1.10886	1.14235	1.13881	1.26164	1.03301	5.1909	1.08136
CPE	19.0811	5.9395	12.3493	73.3274	74.9171	21.1883	2.216	3.41904	17.8285	6200.22	194.934	122.338	36.0814	1	500.236	340.134	16.1261
CPEB4	51.8798	5.16779	7.68908	18.8425	9.04426	6.37146	1.66979	2.08569	2.53865	260.329	64.9796	65.924	11.6203	59.1254	117.495	528.893	165.468
CREB5	9.49039	20.8213	4.29417	1.67691	10.1261	9.92572	27.2062	6.23902	19.7119	1	1	1	174.771	1	1	428.722	302.725
CRISPLD2	1.00239	1.00231	1.00243	1.00241	1.00237	1.00237	1.00221	1.0025	1.00261	1.00246	142.621	1.00257	1.00257	1.00265	1.00239	93.3942	1.00252
CRMP1	428.33	179.113	64.8574	278.007	157.87	255.948	74.2669	51.47	58.4619	3.00342	1.35001	463.367	2.81762	1.77822	14.6258	1.42742	1.22759
CRYAB	1.00256	1.00251	1.00262	1.00258	1.00255	1.00256	1.00239	1.00267	1.00278	266.748	189.584	1.00273	1.00273	1.00284	19.927	18.329	3497.02
CSF1R	1	1	1	1	1	1	1	1	1	1	1	1	1	276.438	1	1	1
CSNK2A2	39.8981	5.99293	5.93341	2.32856	2.31771	3.98581	4.23927	5.42343	6.24684	1.00254	1.00264	1.00267	1.00264	1.00273	1.0025	1.00261	1.00259
CSRP2	315.837	614.682	266.433	574.984	110.08	493.765	849.562	116.985	35.1834	3.07804	12.3779	104.247	79.1781	20.4559	1.77435	6.06384	3.64086
CTNND1	68.8869	94.7755	108.69	40.1229	40.1665	27.6229	60.0841	20.036	62.4297	1.00212	1.00219	1.00221	1.00222	1.00229	1.002	1.00215	1.00213
CXADR	49.8404	20.5354	67.9172	132.299	26.9059	97.7107	21.6155	46.8448	25.7752	1.0035	1.00315	2243	65.6249	45.0279	48.2617	185.636	624.84
D4S234E	1.49675	3.07698	1.00272	4.33429	1.86888	17.8943	1.00333	1.00297	1.00413	1.00272	1.00282	61.5325	1.00282	1.00436	6.60816	1.00278	1.00276
DAP3	72.3947	11.2378	69.7144	9.94413	4.52737	21.7368	2.70546	2.50189	1.00229	1.00226	1.0022	1.00226	1.00221	1.0023	6.61474	1.00222	1.00217
DBI	1218.71	99.2729	490.178	331.792	2549.84	272.43	67.3924	228.983	1	335.82	180.835	1	282.808	523.224	1	859.85	328.339
DCN	1	1	1	1	1	1	1	1	1	1	1182.36	1	1	1	1	1	1
DCX	310.951	532.27	90.1798	667.307	239.347	307.425	56.3324	114.797	152.936	1	1	3195.38	112.409	1	6.83713	1	1
DDAH1	275.894	20.3499	7.67183	15.5636	159.648	15.0086	71.8008	14.6334	1.01224	2709.12	4.75758	1.0042	72.3947	1.00692	1.6665	171.687	1.00314
DDAH2	3.26941	13.7223	2.31013	9.68888	9.97467	22.9932	29.5172	1.00885	1.00898	1.00274	1.00345	1.00346	1.00345	1.00617	1.00265	1.00282	1.0028
DDIT3	1.00205	1.00209	1.00199	1.00187	1.00217	1.00175	1.00211	1.00225	1.00217	55.2607	1822.43	1.00212	1.00218	83.7318	21.1827	9.08003	93.0542
DDX3Y	1	13.0824	4.06449	1	1	1.45106	25.2752	1.00175	1.00185	5.80495	407.459	1	1	1.00174	1	1	1
DEPDC5	14.563	1	1	1	1	1	1.25216	1	1	1	1	1	1	1	1	1	1
DHRS9	1.00278	1.00269	1.00282	1.00279	1.00274	1.00272	1.00259	1.0036	1.01238	1.00283	1.00627	1.00662	1.0066	783.896	1.00275	1.0096	1.00421
DIO2	13.288	1.00277	1.00284	1.00278	15.0994	1.00279	1.00268	1.0047	1.01089	742.437	1.00454	1.00485	1.00551	1.0173	1.00277	1.00997	1.00394
DIXDC1	1.00244	3.09376	1.36965	2.46565	1.27034	1.36476	57.5654	1.00251	1.00249	1.00245	1.00246	1.00245	1.00253	1.00249	4.82353	1.0024	3.75795
DLC1	1.01726	1.0041	1.00857	1.00388	1.02738	1.00399	1.00265	1.01246	1.0276	47.7343	189.737	1.01614	1.01202	1.03665	1.00553	4.31255	3.18337
DLG2	1.09501	2.52959	15.3887	106.391	15.9586	12.65	1.00916	1.04796	1.04139	2.59783	1.03355	32.1425	1.03327	1.05898	16.1181	3.16251	74.0672
DMTF1	357.385	84.3857	137.802	323.465	185.726	172.177	40.7819	36.0701	89.8257	54.0552	4.72461	20.6234	6.92469	1.10159	13.246	9.38193	10.8807
DOCK10	1	1	1	1	1	1	1	1	1	1	2.45012	1	1	65.4336	9.83256	226.552	90.3682
DOCK5	1.07184	1.06641	1.13634	1.08367	1.04543	1.03566	1.01018	1.41557	1.80597	3.85054	1.49888	1.48585	1.48416	2.13052	1.06764	1.44499	241.449
DOK5	2.24094	2.09236	1.07452	7.48005	29.2832	12.9738	11.1144	1.1318	1.23115	1.10584	1.12958	6.916	20.0899	1.24414	1.02428	1.12701	1.05815
DPYSL3	19.352	54.7953	21.3828	273.434	111.715	87.345	19.0388	27.4525	55.2165	11.6091	6.15929	345.165	21.9066	19.6626	2.48247	5.72802	3.70881
DTNA	14.2563	1.63803	2.46157	1.60001	28.3778	2.05952	1.13104	3.97752	3.40313	528.486	2.1356	3.08403	2.40096	4.04617	8.82301	404.333	7.40836
DUSP10	1.11944	2.58949	1.21768	1.16842	1.16025	1.15604	3.68969	1.75397	1.76423	1.29159	1.46275	1.30034	230.313	1.63537	1.23834	378.924	402.798
DUSP11	1.56775	1.49485	14.1382	1.13137	1.10583	1.12993	7.12822	1.77198	1.56879	1.69981	1.29807	1.41898	1.42907	1.63894	1.09667	1.22739	1.17481
DUSP6	54.6917	2.07259	39.4504	3.42774	27.6525	1.82438	1.74753	1.00259	1.00254	1.00252	14.4208	1.00248	1.00248	923.581	1.00242	23.6676	1.00247
DYNC1I2	91.9074	170.474	129.876	242.01	413.238	237.46	93.6981	106.633	155.395	13.518	7.13077	78.7711	21.2159	1.00402	11.4397	12.161	132.375
ECI2	10.832	33.6274	49.3208	2.01856	54.5844	1.6593	66.3438	1.00235	1.00226	1.73046	1.04342	1.00221	1.00221	1.00226	1.0021	1.00221	1.00212
EDIL3	3.44366	1.7353	2.74445	3.03862	2.31771	2.98955	2.52955	4.25206	10.0397	2.35547	13.1761	6.49864	4.76815	16.7475	5.02637	132.858	658.807
EDNRB	1.02808	1.00394	1.28976	1.00464	1.79407	1.00307	1.00329	1.04052	1.04785	1021.07	1.02077	1.02044	1.02132	1.0625	1.00404	1.02602	1.01226
EEF1A1	8424.37	9213.76	8424.37	5516.31	6200.22	6857.2	8819.06	8424.37	3062.86	56.5889	306.979	290.003	248.447	285.371	21.515	44.2732	58.3541
EEF1B2	1116.16	436.871	246.622	208.632	265.092	460.755	545.081	481.48	1.00908	1.00436	167.159	81.7362	20.7909	113.675	8.65557	1.00411	22.895
EFEMP1	1.02132	1.00338	1.01318	1.007	1.0044	1.00433	1.00276	1.02217	1.09824	266.789	1.06025	1.05918	1.06123	1.15509	1.00627	1.03522	1.0342
EFR3B	1.14553	1.0197	1.02022	1.01625	1.01384	1.01027	1.00276	1.04082	1.09426	84.6462	1.15834	29.1306	9.85634	1.12443	13.8153	1.05304	1.03822
EGR1	59.0386	33.0845	178.278	54.5364	287.058	33.5351	163.291	72.9034	6.97849	543.709	5471.64	7.38114	14800.3	4885.02	433.212	8108.48	2693.21
EGR2	1.00254	1.00236	1.00251	1.00248	1.00242	1.00242	1.00227	1.00257	1.00267	1.00254	1.00263	1.00262	1.00274	280.818	1.00246	45.0643	1.0026
EIF3L	588.443	1173.87	116.494	410.413	831.811	536.642	980.927	411.556	51.2848	1	1	282.115	31.082	56.6016	16.1181	1	1.71796
EIF3M	19.111	203.212	241.704	37.2472	31.2426	337.797	810.803	115.352	9.59834	1	1	1.00066	1	1.00076	5.06555	2.50402	2.03658
EIF4A2	1101.17	1454.12	1791.51	2157.24	1677.64	2336.74	1858.78	719.496	518.212	99.532	758.026	676.149	80.3136	122.082	1306.71	471.118	313.252
ELAVL4	1.00278	172.412	10.9647	25.1039	4.69374	127.422	70.9826	5.48054	94.7755	1.00266	1.00275	1.00284	1.0028	1.00284	10.3152	1.0028	1.00271
ELF1	1.00285	1.00278	1.00348	1.00281	1.00281	1.00272	1.00346	1.00453	1.01171	1.00465	22.1291	1.00483	1.00623	273.487	1.00275	8.42514	1.00529
ELF2	57.0648	8.50634	11.2955	8.21208	9.2572	8.78866	10.8113	3.13385	6.79021	1.01629	1.23759	1.48386	7.08333	1.01883	1.12106	5.30242	8.54574
ELL2	1.00666	1.02769	1.0633	1.00478	1.00495	1.01317	1.52067	1.04232	1.05318	1.03491	278.355	1.03857	1.02783	639.708	1.01172	51.2643	31.8708
EMP1	1.00267	1.00259	1.00278	1.0027	1.00264	1.00263	1.0025	1.00278	1.00425	1.00283	220.902	1.00285	1.00285	1.00559	1.00263	8.30734	1.00281
ENC1	14.4332	61.3089	3.80542	45.2727	98.0264	125.255	32.127	1.15817	44.0462	1.00282	1.00282	63.1907	149.526	1.00449	9.52352	1.00278	1.00279
ENPP2	1.00622	1.00283	1.00604	1.00349	1.00419	1.00281	1.00267	1.01801	1.03604	1.04046	1.07299	1.01991	1.01914	1.06472	1.00478	5.67256	1591.29
EOMES	1	1.36965	1	1	1	1.16579	1.6941	1.00153	1.00206	1	1.00173	1.00177	26.5068	1.00193	1	1.00162	1.00157
EPHA3	1	1.01975	1	1	1	1.60744	1.15279	1	1	1	1	47.3451	1	1	1	1	1
EPHA4	84.3857	47.0177	60.9569	11.6557	3.45811	99.5552	1.73275	4.58749	1	2.94876	1	1	9.05613	1	6.50269	1	1
EPS8	1.31853	1.21269	1.17667	109.175	5.27479	1.42819	1.02193	1.70508	1.50192	10.3804	144.302	10.4575	5.14804	1.68294	1.16426	104.57	1.26009
ERGIC3	181.987	107.092	63.3111	19.7856	32.9687	68.1155	284.36	24.3497	3.18114	2.24352	2.24206	3.26667	2.0659	3.39625	2.62552	2.6506	2.00703
ERMN	1.00422	1.00281	1.00605	1.00443	1.00334	1.00306	1.00272	1.01138	1.05829	1.0079	1.05907	1.03312	1.03278	1.10916	1.00421	1.04399	4089.27
ETS2	1.12087	1.06931	1.32467	1.29891	1.24128	1.08012	1.07756	1.41483	2.12578	1.23439	8.47512	1.74746	1.7353	380.278	1.1902	2.10247	1.48309
EZR	282.808	142.174	33.4515	61.3569	110.781	64.568	76.8451	14.9453	101.853	2677.58	22.2668	95.3819	461.416	132.268	1	1	1
F3	4.18841	1	1	1	6.51632	1	1	1	1	4544.16	306.51	1	85.1158	1	1	25.6691	1
FABP3	1.00257	1.00246	1.00253	1.00262	1.00257	1.00251	1.00231	1.0026	1.0027	1.00257	1.00267	1.0027	1.00265	1.00274	364.362	1.00263	1.00263
FABP5	43.8816	69.8529	130.741	207.106	498.76	132.485	124.103	37.694	23.3435	1.00259	1.00267	1.00275	21.3828	1.00276	1.00261	1.00262	1.00261
FABP7	105.529	29.1565	104.88	106.698	466.708	116.117	13.13	18.734	1.0028	1.00275	1.00266	432.003	655.282	1.00274	1.00254	62.1992	1.00261
FAM107A	10.9924	1.42427	1.01736	1.08027	13.7223	1.36875	6.00844	1.03609	1.0616	605.236	1.0913	1.02484	13.014	1.07367	4.24675	1.01813	1.01395
FAM107B	1.86888	1.84267	1.03235	5.50094	1.89963	5.0168	3.21604	1.09236	1.06836	1.00576	1.06503	1.04857	1.60088	1.08579	1.00385	1.0413	719.415
FAM110B	2.91821	5.94596	8.7275	15.2898	8.1708	7.22641	2.21049	4.77303	1.00498	1.00501	1.00403	207.867	18.6865	1.00445	87.7878	285.377	1.00283
FAM117B	1.0028	4.19907	2.92608	10.3893	6.25988	15.2424	2.1745	2.00069	1.00503	1.00316	1.00396	831.049	4.67183	1.00475	2.59451	1.00282	1.0028
FAM133B	58.4619	36.2816	26.5539	22.0759	155.74	62.4543	21.1426	37.1962	84.1843	1.12095	1.18179	1.2587	1.15062	1.39952	1.04806	1.16801	1.09709
FAM171B	19.502	17.6364	61.792	51.6317	79.3344	34.6497	31.4211	38.6365	85.6445	132.384	1.73858	1.99326	1.8322	2.5879	4.15528	4.93594	1.74434
FAM49A	1.00433	1.2438	1.00278	8.42735	2.01836	3.18124	1.00393	1.00389	1.0063	4.36206	1.00441	239.392	1.0045	1.01017	69.567	108.531	1.00405
FAM60A	1.00198	97.1734	31.8228	2.71749	2.52641	9.88673	127.801	99.8895	1.00214	1.00183	1.00201	1.00207	1.00208	1.00212	1.00155	1.00196	1.00196
FANCD2	2.13093	6.53535	2.37029	1	1	1.62269	3.33935	27.8466	13.495	1	1	1	22.1582	1	1	1	1
FBXO32	1.00165	1.00186	1.00158	1.00158	1.00143	1.00178	1.00176	1.00187	1.00198	1.0019	1.00199	1.00189	27.2971	1.002	1.00175	1.0019	21.4599
FCER1G	1	1	1	1	1	1	1	1	1	1	1	1	1	1337.23	1	1	1
FDFT1	586.534	729.564	175.943	133.771	248.447	472.204	503.228	446.977	123.208	39.0947	1	517.547	224.325	1	5.77935	151.158	126.685
FDPS	603.186	409.871	394.43	64.5752	556.704	141.393	444.625	223.486	1	1	1	1	1	1	2.74846	1	1
FER	22.1947	8.84218	3.80239	6.89301	44.7089	10.3148	11.9453	1.67294	1.00177	8.65055	1.00156	1.00175	1.00148	1.00178	1.70536	1.00134	1.00065
FEZF2	1.08288	2.67788	1.09947	1.18439	1.05898	1.56123	82.2118	1.32762	1.47912	1.07384	1.18773	1.29003	1.20588	1.4617	1.0199	1.12566	1.1099
FGF12	2.12144	1.00263	1.00262	4.87062	7.00081	4.67778	1.00227	1.0027	1.00266	1.00267	9.66733	339.805	1.00264	1.00269	1377.23	480.131	1.00266
FGF14	1.00253	1.00246	1.0025	1.0025	1.00248	1.00243	1.00237	1.0026	1.00265	1.00252	1.00267	1.00264	1.0026	1.00269	413.238	23.2447	1.00263
FGFR3	1.40321	1.21906	1.00246	1.00245	1.44523	1.00249	2.09083	1.00257	1.00258	226.738	1.00253	1.00253	1.00254	1.0026	1.00238	1.00253	1.00249
FKBP5	1	1	1	1	1	1	1	1	1	1	1.8365	1	1	113.252	1	37.5438	1
FLRT2	16.2356	2.31515	7.71485	29.3592	4.54582	25.7885	3.00301	1	1	2.92981	1	20.742	1	1	1	1	1
FN1	6.06612	1.78696	1.82343	3.22715	3.11815	1.90165	1	1	1	1	214.434	1	1	1	1.06151	1	1.49562
FNBP1L	58.4619	82.122	35.1834	95.9808	47.2897	71.3193	18.7928	20.9559	33.4515	4.9503	1.00273	477.718	46.5814	1.0028	29.1565	1.00272	1.00267
FOS	1072.62	632.306	506.065	296.547	674.926	475.25	1017.03	194.228	140.896	2899.62	6069.37	13.0324	3922.03	1226.76	522.786	5187.08	4794.4
FOXG1	44.9777	124.001	79.9896	159.857	82.7984	256.589	432.481	43.6	273.026	97.0254	1	842.707	646.564	1	87.7878	91.5043	1
GABBR2	1.0024	1.00245	1.00237	1.38212	1.00253	1.05016	1.23511	1.00243	1.00253	1.00255	1.00256	1.00258	1.00248	1.00256	223.767	1.00248	1.00248
GABRA1	1.31068	1.12346	1.53249	1.57202	1.28735	1.30992	1.04193	1.9103	3.82939	2.1474	6.36305	2.93175	2.8322	5.69664	1173.87	2.65254	3.61698
GABRB2	1.42674	1.29762	1.59435	2.05536	2.01127	1.3532	1.0498	1.98023	3.98384	1.91025	3.41687	3.51961	2.73984	5.98329	260.543	2.57669	2.86559
GABRG2	1.79331	1.40107	1.49968	2.3851	1.44573	1.54063	1.61015	1.94952	4.59152	2.52647	5.42833	3.8612	2.92014	5.78231	268.404	2.18795	3.14371
GAD1	2.66801	1	3.79955	1	3.69931	1	1	1	1	1	1	1	1	1	634.255	4.68394	1
GAP43	314.142	15.0994	3.30455	41.3537	13.88	199.725	11.1428	10.566	19.4726	2.72506	6.1598	627.333	8.86315	22.618	56.441	21.2525	3.95896
GAS5	115.497	310.951	133.947	363.367	421.098	672.752	895.116	442.855	1	1	48.1825	45.0707	72.3947	1	6.25988	1	17.4229
GATM	4.03894	1.05919	1	1	2.6116	1.19501	1.22326	1	1	32.5098	1	1	1	82.4949	1	106.282	31.9712
GBA	23.981	1	1	1	1	1	1	1	1	1	1	1	1	1	1	1	1
GGCX	4.57122	3.10682	5.19343	5.00259	2.43445	2.68598	1.43422	4.63402	20.6628	1	1	1	1	1	1	1	1
GJA1	3.80239	1.00236	1.67748	1.00236	1.00256	1.00231	1.0023	1.0026	1.00257	4602.98	4.04688	1.00252	1.00251	1.00259	1.00237	1.00247	1.00249
GJB6	1.00236	1.00226	1.00239	1.00237	1.00232	1.00229	1.00216	1.00244	1.00256	1601.03	1.00253	1.00252	1.00252	1.0026	1.00236	1.00249	1.00247
GLDN	1.0025	1.00241	1.00254	1.00252	1.00247	1.00246	1.00233	1.00258	1.00271	1.00257	1.0027	1.00267	1.00267	650.788	1.00257	3.81303	562.308
GLTP	7.12866	1.73649	1.40564	2.2852	1.95782	2.49997	3.49933	3.38462	1.00272	1.00271	10.8735	1.00269	1.00264	1.00273	1.00261	120.055	1194.18
GLUD1	21.3828	2.8199	7.3468	1.09071	33.0845	2.18792	2.95213	1.21534	1.00441	1987.81	10.0422	1.0039	18.0738	1.00485	2.81528	46.8874	13.9287
GLUL	19.5905	53.8325	63.3111	9.70964	262.452	25.5024	48.7049	33.5678	15.3439	3883.47	245.884	1.00269	9.97467	333.812	8.29171	229.484	1944.25
GNB2L1	4004.32	4004.32	1461.97	2112.1	2632.63	2147.75	2430.45	3084.44	1054.07	1.00239	346.245	566.102	301.594	98.9547	26.0667	2.52065	10.0306
GNG11	1	1	1	1	1	1	1	1	1	1	171.627	1	1	1	1	1	1
GNG2	15.3657	6.07408	2.54903	59.0492	8.34764	54.5759	3.68391	1.00221	1.00214	1.00188	1.00202	157.522	1.00212	1.00217	9.02308	2.5168	1.00199
GOLGA7	8.29171	5.03802	4.76376	1.56724	8.25837	3.10614	14.3931	1.58713	1.297	1.71389	26.6842	1.36361	4.02395	1.31956	4.60797	4.46382	1200.43
GOLIM4	3.40313	4.32034	13.1882	1.87739	5.74478	3.0384	3.09966	12.3745	38.5538	5.04192	1.15757	1.06992	1.07334	1.16672	1.01912	1.03533	1.0311
GOT1	1.13666	1.0024	1.00236	1.0024	1.00224	1.13553	1.0024	1.00244	1.00245	3.76623	1.00242	1.00242	1.00239	1.00246	560.104	1.00244	11.5587
GPM6B	187.452	74.6174	35.2456	51.2308	351.635	105.205	24.6614	30.4603	50.0345	1341.08	1.70431	33.6436	48.9278	1.00263	67.6466	557.648	2883.62
GPR37	1.002	1.00181	1.00195	1.00192	1.00178	1.00183	1	1.00201	1.00217	1.00203	1.00215	1.00213	1.0021	1.00221	1.00185	1.00218	384.311
GPR37L1	2.48412	1.1526	1.88033	1.57197	1.72218	1.31973	1.12822	2.178	4.74632	438.713	3.5866	3.14652	3.17259	8.1005	1.44754	12.5998	9.6125
GPR56	52.9014	7.19865	12.9279	4.93208	47.2011	1.9753	2.54935	1.00227	1.00224	75.3718	1.00214	1.00216	8.94841	65.6907	1.38539	14.553	1.00204
GPR98	10.241	3.89297	5.23872	3.14419	20.5979	3.30716	4.2125	2.53071	18.7453	656.361	1.00204	1.00211	45.0606	1.00216	1.00186	1.00203	1.00204
GPX1	1.0022	1.0801	8.54979	1.00227	1.00219	1.00222	5.38745	1.00239	1.00236	1.00221	6.76553	1.00235	1.00231	473.405	6.49608	1.00231	1.00225
GRAMD3	1.00379	1.00269	1.00285	1.00279	1.00282	1.00274	1.0026	1.00626	1.01375	439.521	1.01186	1.00671	1.00841	1.02371	1.00281	54.1654	1.01093
GRIA2	147.243	59.754	22.7527	520.411	527.608	253.673	6.49307	1.15521	6.59409	369.43	3.50704	237.648	1.05935	1.12233	760.697	654.59	57.9483
GRIA4	15.5427	1.02263	1.0113	1.02195	1.08443	1.01333	1.01063	1.07429	1.0768	1.07949	1.11299	1.08056	1.04719	1.12778	15.5217	352.449	1.08778
GRIK2	1.04442	1.14961	1.90257	4.42726	1.51075	1.05202	1.03913	1.05209	1.06902	3.40785	1.03123	1.08454	1.02979	1.08196	172.412	22.131	1.03088
GTF2H2	5.5411	4.27117	18.9299	5.11121	1.00143	4.90038	11.4016	4.68851	1.00163	1	1	1	1	1.00158	1	1	1
GTF2H2C	10.2533	2.69732	16.0738	2.6736	1.66442	1.95397	6.10041	2.397	1	1	1	1	1	1	1	1	1
GULP1	22.5246	1.59769	3.43174	1.00238	2.7132	1.00232	16.3867	1.00253	1.00249	1.0023	1.00239	1.0024	2.70798	1.00248	1.00224	1.00236	1.00235
H3F3A	774.113	620.358	261.186	405.463	263.787	564.615	757.923	481.145	577.503	1.5253	1.84591	2.17615	2.08229	3.06362	1.12697	1.58016	1.61504
HAVCR2	1.00261	1.00259	1.00271	1.00263	1.00258	1.00256	1.00246	1.00271	1.00283	1.00267	1.00278	1.00279	1.00279	1147.72	1.00261	1.00281	1.00273
HBEGF	1	1	1	1	1	1	1	1	1.00158	1	197.612	1	1	1.00172	1	1	1.14537
HCLS1	1.00236	1.00227	1.00239	1.00236	1.00232	1.00229	1.00216	1.00244	1.00256	1.00241	1.00252	1.00253	1.00252	97.2951	1.00233	1.00254	1.00247
HDAC2	55.2165	402.074	197.62	303.58	42.0023	426.242	259.978	134.124	176.337	1.72283	1	78.8588	20.6302	1	3.00503	5.2452	10.474
HELLS	3.89644	23.1283	12.4807	4.7415	1.00271	8.46197	18.0872	55.1714	62.9388	1.00256	1.00265	1.00266	4.94426	1.00273	1.00249	1.00268	1.00259
HES1	20.2566	7.08333	18.1111	3.26315	16.6216	6.22365	61.7565	13.3674	87.7878	44.9335	85.0461	1	31.297	1	1	1	1
HEXIM1	1.34323	1.00466	1.20343	1.00279	1.00282	1.00392	1.22778	1.00469	1.00606	4.44667	124.389	1.00431	1.00441	12.1592	4.38351	21.1433	2.12247
HEY1	39.3011	5.23872	1	1	4.78186	1	82.2339	1	1	1	1	1	1	1	1	1	1
HIF1A	356.419	152.592	50.0345	24.8708	27.8496	97.5378	201.129	108.116	25.5672	47.209	2.88288	15.871	16.3322	749.769	2.08872	114.35	1.00185
HIST1H1E	1	14.7482	1	1	1	8.62846	14.4312	12.0088	1.84948	1	1	1	376.533	1	2.81159	1	1
HLA-DRA	1.22534	1.08609	1.3521	1.26849	1.13988	1.11744	1.02802	1.54968	3.04137	1.38761	2.29202	2.31618	2.31138	149.476	1.15517	73.93	1.70483
HMGA2	2.01639	4.65528	4.59152	1.93152	1.39609	2.35465	37.7882	14.4216	14.1961	1.71088	3.20474	3.50819	3.45534	7.42565	1.27957	2.48489	2.24299
HMGB2	2.56785	1273.67	177.513	2.68254	4.89061	47.3281	1749.72	723.564	450.911	5.0059	5.38424	3.44598	207.623	9.01471	3.23603	3.5307	3.49139
HMGN2	473.503	1841.12	296.722	184.551	468.051	604.14	2164.04	1579.36	1531.02	31.9063	6.87176	52.8754	413.238	22.2121	12.545	4.06671	34.9339
HMGN5	2.40096	3.70811	1.88637	1.72296	2.21866	2.29693	57.1377	3.28806	15.9103	1.29087	2.06976	1.73461	5.15804	2.68806	1.21269	1.6509	1.53684
HN1	124.853	787.953	27.8007	287.749	150.901	588.881	809.952	332.499	148.208	1	1	738.568	70.2758	1	5.90316	1	1
HNRNPA0	15.2497	13.6107	8.29171	29.2116	8.99056	27.5395	38.4821	28.0728	60.1093	1.00274	1.00273	95.4937	338.956	1.00276	15.1633	20.1494	8.92129
HNRNPL	35.048	6.35156	26.3218	6.96693	12.8353	5.68214	20.0855	30.4304	86.1775	8.2071	19.0417	12.4639	19.774	53.4184	2.63349	8.68108	10.2121
HOPX	1.00254	1.00236	3.81526	1.00242	8.76026	1.00232	1.00214	1.00252	1.00257	17.1411	1.00254	1.00252	1.00255	1.00259	1.00249	1.00247	1.00245
HPRT1	1	1	1	1	1	1.27437	1	1	1	1	1	1	1	1	282.083	1	1
HSD17B12	47.459	1.37582	1.00237	1.51602	9.44368	1.00247	1.32221	1.00256	1.00252	28.5289	1.00251	1.00249	1.00244	1.00253	1.90357	11.4676	22.181
HSP90AB3P	1.12837	1.19495	1.40464	1.05969	1.14553	1.22334	1.21427	2.55007	1.0027	11.3474	647.664	219.386	131.604	345.082	408.72	380.778	298.048
HSPA2	1.00229	1.00209	1.00224	1.00222	1.00219	1.00211	1.00196	1.00232	1.00242	1.00239	1.00242	1.00237	1.00238	1.00247	1.00219	1.00239	226.316
HTRA1	1.00167	1	1	1	1	1	1	1.00152	1.00175	1641.2	1.00165	1.0015	1.00148	32.7315	10.9092	346.454	423.717
IAH1	13.288	25.5261	30.3223	76.9974	32.1151	34.5385	49.2458	31.3886	17.0569	1.00283	1.00543	1.01294	1.00602	1.01561	1.51698	1.00607	1.00505
ID2	546.707	125.676	29.6517	243.615	1362.31	217.929	89.1145	16.826	1	958.225	194.228	498.109	207.623	900.74	85.6445	91.5689	9.41592
IDH1	545.109	56.2294	60.9569	81.9543	119.798	99.8007	70.4617	122.078	33.8687	38.3749	1.03908	160.401	1.07441	1.1204	1.03841	1.07657	1.03677
IER2	1.53651	1.54252	1.08644	1.22061	2.24094	1.13657	1.70579	1.33403	1.2723	1.08794	21.3635	1.14738	40.4036	1.30452	1.02226	1.11792	1.12588
IFI16	1.01089	1.00278	5.64932	1.00284	1.00348	1.00274	1.00328	1.0063	1.01625	1.0053	21.145	1.00945	1.0093	201.77	1.00278	108.256	1.00879
IFI27	1.00395	1.00278	1.00335	1.00284	1.00278	1.00279	1.0026	1.00404	1.01492	1.00284	429.813	1.00779	1.00766	1.02306	1.00275	1.00511	1.00434
IFITM2	1.00263	1.00261	1.00274	1.00268	1.0026	1.00261	1.00249	1.00344	1.00399	1.00334	312	1.00282	1.00281	1.00475	1.00261	1.0028	1.00276
IFNAR1	4.00022	2.93748	5.24391	11.5533	24.2778	4.63168	3.54235	1.00199	1.00192	2.98205	4.38638	1.00188	1.0019	1.00197	1.45219	1.00182	3.77385
IFT52	1	1	9.7863	1	1	1.10717	3.86597	1	1	1	1	1	1	1	1	1	1
IL1A	1.00229	1.00223	1.00236	1.00232	1.00226	1.00223	1.00209	1.00239	1.00251	1.00236	1.00246	1.00247	1.00246	546.688	1.00226	1.00249	1.00241
IL1RAP	1.11959	1.02241	1.06764	1.07579	1.06589	1.0351	1.00444	1.23994	1.47645	1.08357	1.29337	1.30888	1.30807	179.35	1.06831	124.366	1.18197
IL6ST	3.37412	1.29534	2.83036	1.06839	2.51613	1	2.2839	1.54295	1	85.3144	69.3743	1	9.18605	231.978	9.4207	377.311	31.5556
INA	1.22456	1.37525	1	5.69839	1.99471	4.60445	3.53552	1	1	1	1	38.8211	1	1	11.2807	1	1
IRAK2	1.0028	1.00272	1.0031	1.00281	1.00277	1.00274	1.00262	1.00425	1.01797	1.00348	1.00971	1.01085	1.01086	341.843	1.00278	1.01838	1.00572
ITGA6	6.58049	1.18493	11.8761	1.27038	4.91681	1.07268	1.93678	1.41996	1.32705	41.2651	1.37169	1.15712	1.17667	1.39485	1.01959	1.09199	1.10422
ITGAX	1.01677	1.00492	1.0291	1.02021	1.00979	1.00822	1.00311	1.06237	1.22928	1.03767	1.13711	1.14544	1.14305	641.795	1.01232	1.23059	1.07636
ITGB1	5.34419	17.803	187.452	48.0533	29.9975	22.8931	109.965	21.1745	32.9113	1.27804	32.1411	1.34812	23.3046	28.587	1.22428	11.4784	4.27202
ITGB8	9.62139	10.2533	10.9226	13.7166	13.3433	9.73521	10.9299	27.3202	19.2254	89.2641	1.209	1.38888	692.846	1.42064	1.14755	548.058	394.253
ITM2A	1.01982	1.00642	1.02407	1.01773	1.0138	1.00511	1.00276	1.06731	1.10133	1.01282	3030.3	1.0601	1.05626	1.16358	1.0076	86.3417	882.334
ITM2B	26.5958	6.37738	19.8363	12.986	24.8813	10.0166	21.3694	12.565	1.15985	506.453	1284.72	1.1622	41.7315	2130.1	712.017	1637.49	798.072
ITM2C	1.07659	1.07119	4.7131	1.18707	4.02059	1.05243	1.50944	1.17083	1.12876	728.411	1.09023	1.08353	1.1057	19.9695	15.716	71.4104	1.06178
ITPR2	3.36431	1.00269	1.00405	1.2965	6.44142	1.00275	1.00256	1.00892	1.01013	248.476	1.00775	1.00507	1.0064	300.265	1.00396	88.5222	1.01157
JPX	86.3481	9.3299	49.8404	23.3215	25.8602	10.6206	11.3764	24.6572	1	1	1	1	1	1	1.32743	1	3.19337
JUN	11.0752	2.15956	12.0557	3.35883	3.61744	2.4427	3.18624	3.59316	4.99364	14.935	239.913	1.00249	70.4135	5.45752	3.14872	313.477	15.8431
JUND	21.4476	4.09299	11.8599	7.89886	10.832	6.52924	7.57969	23.0498	55.6382	35.0487	738.567	32.1907	608.857	305.749	23.2546	452.913	302.643
KCNJ2	2.99868	1.00279	1.00507	1.01113	1.00376	1.00282	1.00263	1.01707	1.02536	1.00912	1.01958	1.0128	1.03283	1.04415	1.00611	1.01091	329.045
KCTD12	1.87701	1.67616	2.79323	5.39907	2.65833	2.7374	1.1646	4.34804	16.9351	4.65045	16.5714	17.8158	7.68908	391.229	2.99059	9.56162	4.32303
KCTD6	4.03471	5.46459	3.32548	1.01581	4.53116	4.02856	16.0721	1.141	1.10893	1.10094	1.06695	1.06835	86.7012	1.11451	3.60654	1.07254	1.02773
KIAA1107	1.00212	1.00228	1.00224	2.27282	1.94305	1.49139	1.00215	1.00226	1.0023	3.77704	2.98252	38.9526	9.73541	1.00232	274.426	38.8982	1.00223
KIAA1211	1.00199	1.00205	1.00195	1.00207	1.00189	1.00195	1.00194	1.00208	1.00218	1.00218	1.0021	17.406	1.00212	1.0022	3.38653	1.0021	1.00206
KIAA1598	5.95181	6.07408	1.00267	67.3238	15.276	40.2427	1.91076	1.00278	1.00274	1.0027	8.68933	311.761	1.00277	275.498	38.8634	1.00271	693.471
KIAA1841	2.54363	7.86854	4.42151	34.8966	6.7675	15.1958	5.21752	2.58151	1	1	1	1	1	1	1.40873	1	1
KIF13B	5.32227	1.00223	1.0023	1.00225	1.00227	1.0022	1.00215	1.00238	1.00244	1.00249	19.857	1.00239	1.0024	1.00246	1.00233	1.00244	53.5849
KLC1	1.00279	1.00282	1.00348	1.00313	1.00277	1.00281	1.00354	1.00455	1.01834	1.99323	1.03442	26.5513	1.01141	1.02576	74.003	1.00644	4.93706
KLF6	26.2794	8.85278	19.6236	27.2772	60.3423	14.4133	9.31682	14.3022	40.2431	2.21129	869.459	35.1737	93.2148	722.603	1.47254	38.0828	2.61045
KLF7	11.7162	12.7582	6.44142	15.6686	8.43013	89.1957	3.88699	1.05134	1.02533	1.02829	1.0138	1.89838	5.24391	1.0227	1.00283	1.01107	1.00469
KLF9	1.00395	1.00271	1.00334	1.00283	1.00325	1.00273	1.0026	1.00467	1.01605	19.1191	221.678	1.00769	1.00772	1.02398	1.00491	1.01403	10.8055
KLK6	1.00278	1.00269	1.00282	1.00279	1.00274	1.00272	1.0026	1.00355	1.01265	1.00284	1.00657	1.00658	1.00664	1.02569	1.00275	1.00668	390.318
KTN1	303.113	50.2252	43.7224	111.353	198.548	78.5923	228.919	51.574	55.9767	17.6022	70.5055	15.4206	14.4135	53.0909	8.06991	5.39129	63.1516
LAMP2	5.38453	1.13971	1.76932	1.0025	3.18114	1.24249	2.35172	1.00258	1.00255	488.94	72.3976	1.00256	1.00251	180.805	14.8095	227.847	2671.95
LAPTM5	1.20788	1.07738	1.32569	1.23915	1.12912	1.13251	1.02561	1.52858	2.85122	1.36233	2.13008	2.22086	2.20989	1052.08	1.16602	2.87575	1.73294
LCP1	1.17239	1.06709	1.31536	1.19932	1.11659	1.11169	1.02114	1.45638	2.56785	1.30725	1.96589	2.03616	2.02683	287.79	1.12765	1.65888	1.66568
LDHA	642.405	1531.02	605.094	709.301	44.1259	959.947	822.938	705.903	119.798	2.37455	461.144	2.49535	29.7031	2.74337	177.513	3.96864	1.65719
LEF1	3.58672	2.60179	3.42879	1.74943	1.26172	1.4151	33.673	3.2178	2.90925	1.26255	2.28742	1.86325	1.84695	2.84276	1.11276	1.54098	1.46732
LGALS1	1.02478	1.00629	1.02466	1.01038	8.06991	1.00425	1.02652	1.08347	1.15795	22.2587	1254.91	1.06945	1.07899	1.20715	1.46563	1.05522	1.03362
LGI1	1.16361	1.02788	1.12876	1.12397	1.10882	1.0572	1.00553	1.41532	1.65826	672.743	1.40563	1.41994	1.39319	1.82343	81.4648	1.26755	1.26339
LHFP	1.11227	1.02836	1.12331	1.04955	1.09489	1.025	1.07424	1.30065	1.36136	1.16671	891.366	1.24179	1.1987	1.40439	1.03494	1.1851	1.1052
LHFPL3	1.00275	1.00264	1.00272	1.00272	1.0027	1.00265	1.0025	1.00383	1.00403	1.00271	1.00282	1.00283	1.00283	1.00456	1.00266	305.266	1.00279
LHX2	13.246	14.7687	3.93731	27.6035	4.54582	19.4787	33.1098	2.64411	55.1036	22.6799	1.11698	1.26743	58.7	1.29296	1.01866	1.07619	1.07041
LIMA1	1.302	1.00213	1.00217	4.29082	88.7078	1.00195	1	1.00219	1.00214	1.00205	1.48369	1.0021	24.7437	1.00215	1.00203	160.614	1.00207
LIPA	1.00958	1.0349	1.03075	1.02786	1.04939	1.02641	1.04946	1.09254	1.18134	1.02811	1.3005	1.1001	1.10956	182.038	1.01395	1.17835	404.833
LITAF	104.447	1	1	1	8.40967	1	1	1	1	1	1	1	8.34764	39.837	1	10.387	79.1386
LMO7	1.13938	1.1078	1.00913	15.6608	1.01328	2.24645	1.96796	1.00474	1.01474	1.00349	1.00965	1.01839	1.0076	1.01779	1.35768	1.00657	1.00459
LPCAT2	2.14257	1.21294	1.73342	1.56318	1.32909	1.464	1.08856	2.41181	6.25373	1.86131	3.98464	4.17526	4.10432	277.155	1.57407	4.83075	2.88911
LRRC16A	25.3045	4.8189	5.66058	5.1715	45.9578	6.23965	2.32886	11.1717	13.1359	1316.98	5.2544	8.6173	66.6834	14.1078	4.3127	5.11454	3.47423
LRRC40	2.91356	2.34685	3.15566	3.89554	3.66698	3.84102	2.24033	5.22137	4.78775	2.40612	2.95327	82.7491	3.48401	4.33843	3.54765	3.65846	2.40622
LRRC7	3.81222	3.62846	4.3127	55.4109	15.5217	42.1139	7.72468	1.00498	1.00952	1.00368	1.00284	42.945	1.00281	1.00414	5.63781	1.00348	1.00281
LRRK2	1.00263	1.00256	1.00276	1.00268	1.00268	1.0026	1.00247	1.00282	1.00348	1.00273	1.00318	1.00282	1.00281	1.0045	1.00275	202.541	1.00278
LUZP2	19.8363	1.34838	5.85483	3.14815	13.6107	1.71089	1.09104	7.04642	8.30384	4.13198	4.32918	7.51757	4.78186	14.5319	2.75979	370.977	4.87249
MAD2L1	1	14.3409	1.00162	1	1	1.04866	264.659	1.00191	1.00181	1	1.00063	1.00158	1.00173	1.00182	1	1.0006	1
MAFF	1	1	1	1	1	1	1	1	1	1	118.418	1	1	1	1	1	1
MAGED2	857.239	537.1	796.598	130.634	385.885	135.062	170.075	74.9871	1	1	1	85.2114	6.92469	1	111.245	1	10.8583
MAGEE1	3.64443	1	1	1.39318	1	1	1.48121	1	1	1	1	1	1	1	170.843	1	1
MAL	1.0025	1.00241	1.00254	1.00251	1.00246	1.00245	1.00233	1.00258	1.00271	1.00273	1.00275	1.00266	1.00266	1.00275	1.00248	1.00265	145.986
MAP1B	3397.88	3243.02	1136.32	3522.56	2494.02	3482.84	3267.91	1173.71	1384.52	48.5716	335.79	10248.9	3922.03	5.3631	3106.03	544.082	1320.5
MAP7	1	1	1	1	1	1	1	1	1	1	1.07454	1	1	1	6.82229	1	148.882
MAPK1IP1L	66.9418	76.2656	175.943	58.2911	48.9278	69.6346	57.0662	97.476	31.3531	11.7638	21.9412	283.842	626.312	1.64547	27.3409	115.154	24.9656
MAPT	6.25373	5.74478	2.33682	47.3778	9.4551	14.1413	1.47754	1	1	2.89134	1	25.6498	1	1	4.23656	1	6.16926
MBP	1.00249	1.00241	1.00255	1.00252	1.00246	1.00245	1.00231	1.00263	1.0027	1.00268	41.0334	1.00266	1.00268	18.6422	2.53865	9.10931	1301.76
MCL1	1	2.04552	3.22292	2.07807	2.18899	3.15202	7.60092	1.88026	1	14.8845	524.721	1	12.6885	333.733	1	17.2777	1
MCM3	8.13141	43.3993	3.74644	1	1.79572	2.79393	44.4187	1	1	1	1	1	10.5995	1	1	1	1
MCM4	2.35225	55.2165	1.21162	1.65169	1	9.38341	54.988	1.98269	1	1	1	1	1	1	1	1	1
MCM7	36.4794	484.64	43.9657	9.52128	21.8657	89.295	553.262	108.459	45.6537	1	1	1	1	1	1	1	1
MEF2C	336.163	20.6302	39.6668	1021.19	224.325	135.14	37.5052	1.08949	1.08104	9.75062	23.0321	653.257	1.04284	478.537	350.663	81.2385	4.89169
MEG3	5.67915	80.6467	6.62333	247.471	36.6553	56.4065	119.67	117.764	45.4867	1.80203	2.69175	5.98669	1	1	626.312	35.4121	1
MEGF11	1.00247	1.00232	1.00242	1.00235	1.00232	1.00233	1.00212	1.00247	1.00254	1.00238	1.00249	1.00251	1.0025	1.00257	1.00235	113.546	1.00245
MEIS2	170.843	129.042	30.9755	76.6462	92.0872	131.424	218.857	3.27025	91.157	16.5328	1.00225	15.9954	66.9418	1.00234	1.00206	1.00228	1.00229
MEST	1.82003	1.72833	1	1.22609	1	2.86705	1.09142	15.707	1	1	1	1	1	1	1.59488	1	1
METTL3	2.48863	4.0463	28.2986	5.70351	33.0264	2.38585	5.05502	1.00228	1.0022	1.00212	1.0021	1.00215	1.00212	1.0022	1.002	1.00215	1.00204
METTL7A	1.00244	1.00243	1.00243	1.00244	1.59769	1.00239	1.00217	1.00252	1.00258	337.058	1.00258	1.00254	1.00254	66.6167	1.00241	2.25832	1.00256
MEX3A	1.25264	2.1548	1.7353	3.12769	2.14655	3.23389	1.97576	2.9816	22.9104	1.16446	1.54347	32.457	33.9973	2.15597	1.06226	1.59508	1.34035
MGST1	1	1	1	1	1	1	1	1	1	214.534	1	1	1	1	1	1	1
MIR22HG	1.00366	1.00272	1.00351	1.00282	1.00275	1.00274	1.00261	1.0049	1.01307	1.00713	267.052	1.00754	1.00766	1.03377	1.00317	1.01581	1.0045
MIS18BP1	1	18.7736	8.18886	1.3753	1	4.2139	6.36461	7.31427	27.5479	1	1	1	13.288	1	1	1	1
MKI67	1.00283	33.0845	1.00284	1.00304	1.00273	1.97629	27.108	7.27816	26.6456	1.00275	1.00348	1.00375	10.818	1.00648	1.00266	1.00283	1.00281
MLLT3	60.5742	44.2864	53.0067	221.046	142.484	357.291	20.0547	29.5909	62.6853	2.67003	1.01387	244.771	61.0794	1.02652	9.20888	1.02053	1.01332
MMP16	2.32134	2.17822	5.71047	2.89314	6.51632	4.04914	1.09329	2.73537	1.14398	1.01255	1.02899	4.81609	1.03987	1.08051	2.00752	301.935	1.01707
MMS22L	2.0714	9.67937	1.59488	3.13981	7.56866	5.14431	3.94811	4.47	17.7136	1.01227	1.01971	1.02822	31.8876	1.06681	1.00378	1.027	1.01261
MN1	2.02502	3.30455	6.49608	4.59892	7.41329	6.4233	3.01485	1.0028	2.91113	1.00262	1.00272	88.0728	10.9505	1.00276	1.00254	1.00268	1.00263
MOB1A	11.9739	6.83713	11.3158	7.59088	5.89497	9.25363	161.462	3.72409	2.47206	1.75941	1.70771	1.71088	1.69448	8.42755	1.08826	1.54411	1.38988
MOBP	1.00246	1.00243	1.00251	1.00249	1.00243	1.00243	1.00229	1.00255	1.00267	1.00255	1.00274	1.00263	1.00262	1.00272	1.00247	1.00266	222.938
MRPL21	8.9375	4.989	1.12208	1.30717	1.46427	1.59448	72.2907	1.85919	1.54495	1.11537	1.57935	1.61412	1.27634	1.72352	3.95644	1.2744	1.28331
MSI1	1.10947	1.91348	1.944	1.59927	1.60168	1.76713	1.77648	5.37662	6.70498	1.08186	1.02268	1.07411	54.1427	1.06618	1.00422	1.02744	1.01261
MSR1	1.00282	1.00273	1.00351	1.00283	1.00278	1.00276	1.00264	1.00441	1.02415	1.0039	1.0121	1.01249	1.01262	1106.76	1.00281	1.02241	1.00702
MSX1	1.00443	1.0028	1.00441	1.00363	1.00278	1.00281	1.00263	1.01114	1.02275	1.00545	326.42	1.0123	1.01215	1.03398	1.00278	1.01616	1.00651
MT1E	1.00283	1.00275	1.00413	1.00309	1.01294	1.00279	1.00265	1.00607	1.02661	216.603	39.2238	1.01389	1.01622	1.049	1.00282	1.01941	1.01033
MT2A	1.02153	1.00642	3.75333	1.00417	14.6863	1.00282	1.00422	1.03266	1.03659	583.133	604.829	1.01571	1.02564	1.0577	1.00346	3.81313	8.36293
MT3	1.00268	1.00253	1.00263	1.00263	7.23772	1.00251	1.00237	1.00272	1.00278	547.717	1.00275	1.00272	1.00273	1.0028	6.43308	7.61041	1.00274
MTHFD1	1	10.7751	1.00161	7.09041	6.80012	63.6559	18.2722	2.21676	1.00157	5.19819	1	1	1	1.00147	1.77951	1	1
MTRNR2L8	1	1	1	1	1	1	1	1	1	1	1	1	1	1	1	1	1
MYADM	1.63803	1.30588	1.34768	1.44119	1.16859	1.18198	1.202	2.04836	1.89447	1.21949	121.36	1.67039	177.513	116.523	1.94672	65.8377	71.1086
MYO10	120.312	42.2442	48.7368	20.7182	44.7089	21.4003	171.241	46.8892	31.031	229.816	5.06043	1.05821	82.7984	1.11354	1.00853	17.1817	10.9783
MYT1L	139.965	81.4648	5.43351	330.243	87.9759	67.7045	19.5183	1.00239	1.19328	2.4764	1.00237	119.16	1.00233	1.00239	159.997	1.00238	1.00234
NAIP	8.57411	10.8953	5.80251	5.31842	7.97183	6.52505	21.4282	13.2295	27.3409	2.752	7.57182	8.27031	8.11124	26.0274	1.62823	4.65173	4.29752
NAP1L2	1	1	1	1	1	1	1	1	1	1	1	1	1	1.00144	97.3762	1	1
NAP1L3	3.09813	1	1	3.50298	1	1.27755	1.42415	1	1.00143	1	1	1.0016	1	1.00143	1504.49	6.35811	1.00075
NEDD4L	4.56757	184.872	12.9629	71.3412	75.2103	212.252	106.568	1.2389	60.5742	1.00245	1.00242	76.5905	172.006	1.00245	7.42969	1.00234	1.00234
NEDD9	17.0817	5.63107	11.35	1.87742	4.0274	1.58409	5.35246	1.00209	1.0021	1.00211	4.2896	1.00207	8.39987	199.559	1.00163	6.71444	1.00192
NELL2	1.16264	13.3242	6.82952	152.901	20.2566	81.7893	4.51739	2.58493	1	1	1	198.166	1	1	6.69058	1	1
NEUROD6	7.74919	30.8727	1.00325	66.2689	6.1939	193.573	20.7885	1.00481	1.02764	1.0028	1.00438	2394.68	1.00478	1.012	1.00276	1.00368	1.00374
NFIA	419.939	704.623	203.683	58.2418	259.223	224.347	797.267	8.54521	378.562	660.282	145.962	412.656	1384.52	35.1447	2.3827	317.934	257.927
NFKBIA	1.43918	3.73333	1.01963	3.32328	1.0063	2.34424	18.3249	1.04051	1.06641	98.4795	1675.65	1.03977	1.02908	104.636	2.77224	45.8193	19.735
NFKBIZ	1.01007	1.00441	1.02105	1.00438	1.0607	1.00414	1.01576	1.05208	1.06427	1.37983	235.544	1.0288	1.05804	96.4151	1.00414	17.1946	1.03425
NIPAL3	1.00277	1.0027	1.00275	1.0027	1.00271	1.00268	1.00262	1.00282	1.00431	1.00279	1.00422	1.00361	1.00348	1.00716	3.4739	6.74582	244.46
NKAIN2	1.00198	1.00203	1.002	1.2103	3.28128	1.06774	1	1.00211	1.00217	1.00194	1.0021	36.6251	1.0021	1.00219	1.00204	1.00204	52.0884
NONO	165.944	530.673	241.704	54.4803	84.5731	366.145	572.384	254.911	190.92	3.34031	1.00226	96.1742	131.038	69.5199	8.86315	35.0832	6.07238
NPM1	1803.73	2865.22	1828.46	1504.4	1438.4	2281	3152.94	1964.67	1131.3	43.2969	288.311	130.196	118.781	310.07	41.661	22.5035	67.4743
NPNT	1.00226	1.00202	1.00223	1.00214	1.22656	1.002	1.00183	1.00222	1.00233	1.00224	1.0023	1.0023	1.00231	1.00237	1.0021	1.00225	1.00222
NR4A1	1	1	1	1	1	1	1	1	1	3.12734	196.152	1	1	13.9087	1	1.96979	8.00681
NR4A2	1.11915	1.03591	1	1	1	1	1.9653	1	1	1.98831	61.7543	1	1	29.142	1	3.75494	22.2862
NRCAM	18.0142	6.47518	5.07056	9.99143	6.70498	8.13951	1.38216	1.01188	1.00844	410.461	1.00391	7.51662	1.00497	1.00936	111.944	664.376	1.00405
NREP	2076.71	1430.6	1096.42	1942.82	1195.88	2138.82	1412.28	494.704	653.095	1.00252	1.00247	713.244	133.656	1.00256	11.2666	1.00248	1.00244
NRIP3	1.00245	1.00235	1.00243	1.00243	1.00246	1.00233	1.00217	1.00257	1.00259	1.00244	1.00257	1.00254	1.00253	1.00263	301.594	1.00254	1.00253
NSF	5.35221	1.76348	1.00274	1.66825	1.25136	1.07015	1.16415	1.00479	1.00368	1.00285	1.00282	1.00302	1.0028	1.00412	392.341	1.00306	4.84797
NTM	80.9624	1.72137	21.1372	217.083	71.9565	86.7047	1.27617	1.00479	1.00435	533.062	1.00316	40.2461	1.00333	1.00425	11.3158	84.5107	13.7742
NTRK2	1	1	1	1	1	1	1	1	1	738.937	12.2751	1	1	1	18.574	194.698	6.87758
NTRK3	14.2154	6.34486	1	3.86405	13.1359	4.16569	209.19	1	1	6.728	3.46361	1	1	1	3.79955	2.86291	1
NUDT4	24.5662	5.45883	3.91809	12.5391	44.2082	16.7578	18.7908	3.81319	8.70632	1.0785	1.27847	1.23344	1.20562	1.45111	1.03316	1.12182	1.10701
NUMB	9.89972	4.64252	24.364	5.61582	25.1209	4.41103	4.52619	1.00418	1.00284	8.31773	1.00311	1.00283	1.004	4.01712	1.41636	3.20511	1.00274
NUP153	2.35095	2.64401	2.77814	1.6176	2.06234	1.9289	2.18712	4.2627	5.53601	2.88415	5.5882	6.1597	197.62	7.90571	3.28598	209.124	3.21378
NUSAP1	1.00279	348.774	1.00279	1.00271	1.00271	18.5761	48.6752	193.027	185.726	1.00282	1.00277	1.00277	446.977	1.00285	1.00259	1.00272	1.0027
NVL	2.50547	6.43308	5.358	13.7416	54.4773	7.13621	18.8599	1.00454	1.00359	1.4418	1.0028	1.00284	1.00284	1.00388	1.46078	1.00278	1.0028
OAT	74.1555	1.06782	1.00203	44.623	56.441	7.36179	7.34763	1.00208	1.00202	604.398	122.685	1.00202	1.00208	1.00204	903.29	29.0886	174.024
OCIAD2	9.59834	5.86682	1.00278	8.56485	1.00396	107.465	74.0937	1.00498	1.00438	1.00272	1.00389	95.5819	1.0039	1.00457	1.00274	1.00283	1.00279
ODF2L	7.08333	2.47206	1	42.458	22.4441	32.3274	4.59557	4.12105	1	1	1	8.93363	1	1	5.75032	1	1
OLIG1	1	1	1	1	1	1	1	1	1	1	1	1	1	1	1	193.844	106.682
OLR1	1	1	1	1	1	1	1	1	1	1	1	1	1	3972.64	1	1	1
OPALIN	1.00158	1	1.00171	1.00162	1	1	1	1.00184	1.00205	1.00177	1.00204	1.002	1.00198	1.00211	1	1.00202	2924.66
OXR1	7.35459	3.87344	9.69089	5.23383	3.63607	4.94311	58.8042	1.00232	1.00224	12.5701	1.00226	1.00218	1.00228	80.1801	540.295	43.846	37.8121
P2RX7	1	1	1	1	1	1	1	1	1	1	1	1	1	9.38451	1	223.985	133.445
PABPC3	1.48959	1.00836	1	1	1	1	1	1	1	1	26.6984	13.3629	38.3382	145.969	1	13.3076	1
PABPN1	12.1812	11.6203	14.0772	14.6351	20.8213	8.54416	9.24807	11.2867	50.3158	1	1	1	1	1	1	1	1
PAFAH1B3	2.05222	71.384	1.15795	91.4364	10.241	151.894	15.7763	2.00742	1.48647	1.07961	1.26821	329.286	1.34524	1.48706	3.22773	1.13387	1.12515
PAK7	1.17349	1.41332	1.00282	3.59136	3.64443	3.31734	1.49523	1.0095	1.01249	1.00281	1.00568	24.6003	1.00493	1.01305	1.00904	1.00455	1.00398
PAN3	21.7655	19.2254	42.9085	34.014	20.1202	18.4428	26.8464	22.6	11.2807	25.575	8.20352	107.454	44.2082	43.6096	94.3852	641.818	96.6109
PAPOLA	110.533	290.752	239.887	182.461	157.159	452.55	875.175	101.953	94.5845	25.6386	5.91506	81.6421	43.7224	7.87619	42.9085	144.473	21.7956
PARP1	54.7953	218.865	64.5914	74.5358	41.093	33.5621	131.594	37.4771	1	12.0811	1	1	7.49992	1	3.57678	1	14.6887
PAX6	97.3762	261.186	31.7605	3.32408	14.7482	19.3552	172.805	64.2155	127.069	31.6519	1.00282	1.00283	97.8214	1.00439	1.00275	1.00283	1.00278
PCDH15	1	1	1	1	1	1	1	1	1	1	1	1	1	1.00141	1	160.245	1
PCDH9	115.497	12.8166	36.9509	24.1695	27.9891	14.6997	13.5304	14.83	15.7621	1646.35	15.0008	48.5984	55.3187	15.9369	640.403	2229.35	3963.17
PCMT1	24.238	73.3993	80.4705	234.694	63.4385	402.675	179.51	1.4594	1.18078	1.78088	1.14041	24.5697	11.5555	1.19317	406.563	39.4632	22.3544
PDE4DIP	17.4902	19.4726	5.82939	195.339	35.1199	108.519	2.33153	1.42862	1.16959	36.0131	1.13486	12.0877	9.77378	18.2807	6.71912	19.4591	8.77728
PDE7A	2.8038	4.22924	4.55098	2.88391	2.65991	2.4887	5.49877	7.29761	22.711	2.33087	8.74234	9.6066	7.48312	18.2026	1.85271	5.46488	3.93215
PDGFRA	1.97022	1.02654	1.17765	1.20213	1.90257	1.0785	1.00864	1.80168	1.85028	1.15239	1.61551	1.52387	1.56052	2.11647	1.08557	365.56	1.34257
PDZD2	1.00166	1	1.00168	1.00191	1.0014	1.00156	1	1.00186	1.00199	1.00164	1.00195	1.00195	1.00187	1.00201	1.00182	144.961	1.00189
PEA15	38.5538	9.73541	3.47629	17.5852	26.1088	13.2433	21.6684	1	1	104.299	12.5425	1	346.089	568.674	25.2021	166.683	22.056
PELI1	3.54475	1.66777	1.33634	2.83109	1.64157	2.45368	1.53121	2.28119	1.78101	1.10259	26.7952	1.80728	1.59845	23.0783	1.20788	206.401	10.0199
PELI2	1.45395	1.92463	1.77505	1.93548	2.06689	2.24166	2.44978	1.65134	1.92021	2.1059	1.35569	1.70618	40.6324	1.86141	1.07966	1.62023	1.30159
PER2	12.398	3.06398	9.53509	4.32682	8.18886	6.18477	7.01114	6.01929	7.63857	68.7694	101.294	42.4043	1023.12	182.567	10.7887	874.396	8.96463
PEX5L	1.04328	1.0199	1.03402	1.23705	1.02206	1.03142	1.00282	1.06909	1.20737	1.04098	1.17594	1.20973	1.12224	1.32669	5.59206	1.18667	437.887
PGM2L1	3.48401	2.17822	2.03117	7.00125	4.5196	4.20352	1.68147	1.45636	1.01256	1.47638	1.00446	144.398	1.00351	1.00438	119.284	1.00279	1.00283
PHIP	23.9425	38.3382	26.5068	17.1311	17.7406	26.2363	44.2086	26.4257	185.726	19.5107	17.7409	28.2431	191.36	67.4189	28.3778	89.996	67.1316
PHLDA1	29.341	11.0189	1.0763	6.73105	29.6517	10.281	48.1296	1.31283	22.6269	1.02819	12.6001	1.1387	133.374	22.497	1.07223	50.4718	1.06712
PIP4K2A	2.10391	3.29295	3.653	3.78659	6.311	2.76983	2.94768	1.00268	1.00261	69.5442	1.00263	30.2879	1.0026	1.00264	3.355	2562.36	8424.37
PITPNB	87.0606	17.1311	11.4244	30.2373	18.5405	23.5576	38.4402	2.49784	1.00267	1.00252	1.00263	1.00265	1.00261	1.00269	1.00263	1.00263	1.00257
PKIA	1.10524	1.21101	1.77951	6.63744	4.21227	4.95027	1.9243	1	1	1	1	51.687	1	1	3.34179	1	1
PLA2G16	1.00253	1.00245	1.00259	1.00255	1.00256	1.00249	1.00235	1.00264	1.00274	1.00279	1.00278	1.0027	1.0027	1.00278	1.00256	1.00272	149.923
PLEK	1	1	1	1	1	1	1	1	1	1	1	1	1	1729.6	1	52.1877	1
PLEKHB1	1	1	1	1	1	1	1	1	1	12.7527	1	1	1	1	1	5.69708	164.562
PLIN2	2.01033	7.97183	2.97393	1.63088	2.37029	1.63545	139.725	4.00928	2.55835	1.40162	2.05854	1.89123	6.72554	109.674	1.09074	20.6458	1.5826
PLLP	1	1	1	1	1	1	1	1	1	1	1	1	1	1	1	5.7537	432.479
PLP1	1	1	1	1	1	1	1	1	1	1	50.4263	1	1	38.37	1.00204	706.791	21766.1
PLXNA4	1.74146	1.16343	1	1.88585	3.09588	3.0231	1.02809	1	1	1	1	37.064	1	1	3.25516	1	1
PMP22	1.44121	1.12952	1.26435	1.14725	1.19603	1.04969	1.01079	1.58893	2.15256	492.113	462.957	1.62396	1.7353	2.58582	1.12876	52.7653	1927.67
PNMA2	1	2.00542	2.27465	3.53404	1.9996	2.15656	1.61534	1	1	3.40851	1	1	1	1	606.962	1	1
PNRC2	2.09114	13.0311	1.38268	33.9016	21.939	3.83286	22.5542	3.51906	1.00175	1	1	1.0006	1	1.00174	1	1	1
POLE3	2.58949	8.78114	3.4739	3.87322	3.12002	3.62769	105.221	8.37797	6.98618	2.07946	4.82476	5.05894	4.63037	9.14638	3.12781	3.90225	3.7345
POM121	2.55532	2.93748	3.89644	2.39501	2.3789	2.33749	2.50043	6.05818	22.711	4.11952	8.25836	9.27893	8.68156	28.2952	1.95782	4.87982	5.07259
POMT2	3.09813	1.68511	2.30625	2.06255	2.12796	1.81722	1.14086	3.73586	14.8496	3.10061	6.82609	8.09057	7.75794	27.1006	1.68774	4.58713	4.71746
PON2	1743.59	66.157	695.203	8.76502	1201.74	4.94109	169.606	81.8679	1.0019	4794.4	107.775	1.00165	39.1528	1.00191	1	2168.26	664.447
POU3F2	3.75684	1.45972	4.63862	7.8278	29.8247	6.75685	1.65952	1.96738	1.47347	1.94438	1.09279	28.4316	76.888	1.22639	1.01245	1.13595	1.06536
PPAP2B	84.1843	5.98129	2.60653	1.60073	5.20869	1.39062	27.7233	1	1	948.697	1	1	1	1	1	17.8149	11.3884
PPFIBP1	1.00446	1.01248	1.90159	9.91589	1.02804	1.02065	2.05963	1.02472	1.0287	1.00433	33.5388	1.01961	1.01235	1.04115	2.78905	1.0256	1.03172
PPIP5K2	208.642	56.1131	132.193	160.374	67.207	104.073	124.997	35.9489	93.9905	29.1467	1.10151	24.4898	6.2263	1	11.3942	1	6.34393
PPP1R15A	1.31359	1.15534	1.19625	1.0843	1.09869	1.12252	1.20112	1.42462	1.55561	1.35987	202.885	1.39382	7.84645	14.0564	1.98971	1.33136	1.32193
PRC1	14.9731	103.803	1	1	1	2.11636	105.37	9.36903	1	1	1	1	46.3212	1	1	1	1
PRKD3	18.2284	8.06991	92.4672	10.6873	9.00166	6.06403	13.3246	11.4018	4.43409	2.01971	3.35369	2.73585	1.64579	1.04458	5.12067	6.55898	1.01615
PRNP	4.99785	1	1	4.39017	4.90809	1.28547	1.87655	1	1	302.975	634.358	1	1	226.496	1406.65	638.597	584.739
PROM1	1.09129	1.52518	2.87454	7.15021	2.31391	1.74738	3.94174	1.44542	1.31817	1.03281	1.14129	1.2027	1.18411	1.32173	1.01175	1.08413	1.07801
PSAT1	6.17538	8.04041	23.7762	13.7481	94.7755	3.47598	15.4498	14.2497	1.00203	1391.52	1.0019	1.0019	88.8864	1.002	1.00144	552.155	1320.79
PSD2	1	1	1	1	1	1	1	1	1	355.204	1	1	1	1	1	6.16426	1
PSMA1	246	58.9286	127.339	98.7807	149.184	42.0608	459.618	61.5185	1	1	6.28627	34.9658	32.001	23.6606	57.5084	5.9	12.8622
PTGDS	1	1	1.00165	1.00162	1	1	1	1.0018	1.00202	761.338	175.138	1.00195	1.00195	1.00208	1.00193	1.00193	435.033
PTN	15.2497	8.61855	10.6125	14.4607	436.871	10.2569	1.37643	12.4635	48.5559	2337.2	1249.81	1.0023	1391.52	1.00231	4.20418	227.981	274.426
PTP4A2	18.4786	88.1665	18.7736	63.7742	45.1471	75.8058	388.645	44.8492	15.1424	3.01722	27.8448	20.3642	21.035	116.295	7.19865	12.0692	226.208
PTPRC	1	1	1	1	1	1	1	1	1	1	1	1	1	304.75	1	1	1
PTPRD	14.563	10.5074	9.23099	56.3494	47.825	57.5084	2.61153	2.71716	30.923	1	1	196.243	13.6107	1	70.5542	170.546	291.124
PTPRE	7.1827	1	1	1	2.15713	1	1	1	1	1	1	1	1	360.002	4.38351	23.6675	1
PTPRZ1	782.363	434.364	755.345	389.918	1828.46	669.584	234.479	390.759	354.477	1036.22	1.00444	119.156	497.337	1.01614	4.5196	4089.27	1.00476
PTRF	1.00236	1.00216	1.00236	1.00229	1.00222	1.00223	1.00204	1.00236	1.00248	1.00232	125.321	1.00243	1.00243	1.00252	1.00223	1.0024	1.00245
PTTG1	4.55532	159.997	8.4965	2.29581	2.03212	2.4121	257.3	16.9105	31.6424	1.72865	3.6402	3.59685	116.241	9.08826	1.74146	2.52695	2.58063
PXK	4.96269	1.00214	1.00205	1.00213	1.00201	1.29043	1.00217	1.00216	1.00223	1.00217	1.00219	1.00219	1.00216	1.00226	1.38005	16.6455	603.162
QDPR	1.00671	1.01637	1.00657	1.01969	1.00426	1.01062	3.08691	1.02902	1.04391	1.02589	1.0433	1.02721	1.02336	1.07119	26.9527	21.9061	3247.93
R3HDM1	6.50269	9.08929	12.1971	323.921	11.4397	41.7231	29.1982	3.32201	1.02217	2.34775	1.00924	15.9311	1.01068	1.0228	18.7453	7.5265	1.43456
RAB31	148.864	1.0025	1.00267	1.00261	54.0361	1.0025	1.00235	1.00277	1.00277	45.1002	1.00271	1.00271	1.00274	224.632	1.0026	610.299	1.00266
RAD54L2	9.23099	2.63195	2.88029	1.41611	2.32274	3.09738	10.2496	1.00237	1.00232	1.00221	1.00227	1.00227	1.00225	1.00231	1.00219	1.00225	1.00218
RAI14	157.159	9.5864	7.35459	8.30854	6.85157	13.2036	11.0353	1.35079	1	1	1	1	5.55688	1	1	1	1
RAN	238.175	1254.92	188.311	815.449	322.505	468.013	755.771	1025.35	188.311	6.65612	134.525	74.269	77.0345	29.2588	29.232	5.52116	26.4882
RANBP3L	1	1	1	1	1	1	1	1	1	834.206	1	1	1	1	1	1	1
RAP2B	13.246	11.9275	23.0858	7.91998	15.8621	13.2469	21.2004	11.8082	4.8042	2.05681	2.86834	291.879	445.719	586.87	2.34685	1.94405	1.62483
RASGEF1B	1.00256	2.9637	1.00246	1.81372	1.00245	3.81418	4.01165	1.00261	15.1205	1.00241	1.00252	1.00253	1.00253	1.00261	1.00235	1.00259	1.00253
RBM23	7.78238	23.6554	66.5519	4.64702	15.015	8.68935	25.9072	12.6957	1	1.31094	7.10244	1	9.31535	1	2.84186	25.4777	1
RBM5	184.463	404.367	605.094	147.814	62.1808	249.201	259.89	52.6478	82.447	21.2418	12.2815	18.6649	69.428	3.75146	20.193	74.464	20.539
RBMS3	1	1	1	1	1	1	1	1	1	15.8609	266.217	1	1	1	2.43445	1	1
RCAN2	1.08288	1.01068	1.04912	1.03068	1.0158	1.01653	1.00385	1.09469	1.3956	1.07783	1.26051	1.23728	1.21987	1.49161	67.7798	1.33154	18.5557
REEP1	5.09567	6.73195	1.01369	28.302	5.27479	37.8341	10.1268	1.00629	1.01219	1.00284	1.0065	113.718	1.00632	1.01463	30.1087	1.00539	1.00441
REEP3	10.7475	2.9637	8.85278	2.80366	5.79673	1.36775	3.07783	7.27643	1.01934	5.27004	21.2097	1.00908	57.8674	1.01868	1.00322	99.1274	978.895
REEP5	57.8674	3.3093	4.03471	17.7983	49.1209	18.358	1.0072	1.02672	1.01235	23.6625	11.1128	19.0452	1.0057	1.01872	866.874	1.00818	134.991
RELL1	1.0048	1.00283	1.00438	1.00284	1.00281	1.00283	1.00265	1.00477	1.02829	34.0125	1157.01	1.02243	322.505	1.07132	1.00443	1.02617	1.01365
RFTN2	1.04079	1.07639	13.6678	1.66434	48.8318	1.06016	1.04083	1.16656	1.07441	281.141	1.0365	1.03037	42.3241	1.08833	1.00444	377.217	516.014
RGPD5	36.5816	33.8059	58.8128	51.0985	58.5846	39.2928	87.3786	75.5343	59.5166	1.01477	1.06646	1.06881	1.06958	1.16733	1.00451	1.04156	1.03266
RGS10	1.03368	1.01182	1.07281	1.04119	1.02336	1.02223	1.00427	1.13292	1.42472	1.07005	1.25336	1.27977	1.27634	570.437	1.0253	1.2523	1.14564
RIMKLB	1091.63	118.273	395.582	631.838	417.625	396.798	71.6755	85.9072	74.3075	15.3927	11.9822	20.7973	8.7275	24.5432	2.45862	5.78504	4.84514
RNASE1	1	1	1	1	1	1	1	1	1	1	207.035	1	1	1	1	1	3018.55
RNF213	5.47046	2.05127	16.0512	2.46982	3.15324	1.44989	1.25522	1	1	6.37535	9.07709	1	2.01127	13.8482	1.17349	1	3.19315
RPL10	2577.5	3020.99	3512.7	1698.9	2577.5	2849.67	2467.93	2940.19	1306.71	7.83845	105.187	76.7081	61.9209	68.3286	6.5221	2.19327	15.4315
RPL11	301.594	768.48	724.404	466.695	515.223	827.907	871.865	709.631	214.289	1	561.825	444.424	201.804	287.12	17.8555	16.0361	39.6725
RPL12	281.384	716.928	484.64	450.905	372.477	440.986	875.66	767.427	149.863	1	49.3976	17.7656	22.9946	95.8891	2.46739	10.7061	11.6577
RPL13A	1267.55	1709.19	1399.15	758.152	1504.49	1567.85	1520.32	1791.51	692.846	2.6107	12.6086	12.4394	7.7999	17.7253	3.22045	8.1231	15.2237
RPL14	422.268	1141.56	618.537	641.172	850.611	716.975	1128.67	1300.12	490.178	1.92376	131.836	105.109	85.8179	107.748	19.8363	1	8.89442
RPL18	142.484	501.759	357.385	171.282	282.083	519.788	383.505	477.021	123.466	1	16.3705	104.461	129.042	52.2513	9.59834	1	9.58115
RPL18A	614.682	1230.6	950.102	573.319	545.109	988.147	1218.66	1399.15	679.282	2.24474	28.4109	21.3481	15.7849	41.8982	2.2694	4.18941	5.25364
RPL21	1320.5	1908.43	1513.06	1781.65	1656.07	1792.36	2394.56	1920.97	1242.41	1	1	1	1	1	1	1	1
RPL23	2794.2	3573.93	1677.64	2522.53	2394.68	3384.65	4174.21	4004.32	1755.06	9.03225	247.686	149.688	156.801	271.272	19.8687	17.5559	30.2622
RPL23A	1384.52	1755.06	1504.49	1484.71	1531.02	1400.08	1219	2232.68	765.857	15.7384	73.8066	50.4528	39.8122	122.994	6.44818	7.75142	13.2238
RPL24	466.708	732.155	416.511	453.934	522.786	671.739	698.273	803.935	388.015	5.00499	113.717	74.7665	111.245	100.8	14.2803	16.1863	39.9012
RPL27A	305.513	572.222	616.672	401.872	353.481	451.633	266.601	565.354	333.538	5.29858	28.4756	24.3602	40.0096	50.9094	2.63052	6.36945	6.90441
RPL3	3637.01	5516.31	3512.7	2109.17	2902.01	3293.45	4152.11	4270.84	1267.55	66.4825	708.207	370.403	485.991	125.904	141.803	9.40556	46.731
RPL31	699.79	776.932	893.119	703.385	768.48	652.549	781.518	1141.54	616.672	3.16099	61.434	76.7969	59.2806	152.502	11.8599	6.26096	14.1698
RPL34	1347.96	1320.5	1306.71	1133.94	1006.17	1108.83	1400.08	1577	1184.92	7.21793	170.775	157.704	140.267	160.401	10.9092	14.8731	21.4994
RPL37	234.762	264.446	163.374	238.664	141.803	234.202	163.221	393.929	339.805	1	47.6757	24.6335	28.9971	78.2187	2.59605	1	6.01323
RPL37A	1201.74	1377.23	1086.69	951.576	997.886	1193.1	1373.22	1625.83	899.821	11.3895	82.8107	123.316	86.7012	119.921	12.8525	5.37307	16.8123
RPL39	737.235	683.791	1086.69	564.615	519.871	838.454	638.286	798.134	692.846	1	13.1456	9.80105	6.75334	15.1416	1	1	1
RPL4	2794.2	2370.67	1306.71	1692.88	1487.01	1478.52	1687.43	1828.92	1151.96	1.15147	107.166	275.528	156.801	135.565	21.2159	13.1987	14.3734
RPL41	2522.01	3292.8	3844.9	2278.12	2979.64	2658.1	3224.96	4374.38	2693.21	212.996	179.313	87.2445	80.3136	137.153	55.3187	4.17729	30.8135
RPL6	257.921	942.825	287.785	536.18	799.548	734.692	830.434	756.73	277.252	1.06061	10.5801	28.604	10.216	55.2379	2.87253	3.1194	8.68208
RPL7	1522.11	2725.03	1586.52	1940.92	2441.88	2212.72	3062.86	2883.62	2076.71	1.05415	17.3486	26.806	14.0772	44.5873	1.88114	2.43445	7.17598
RPL7A	410.997	1596.07	870.017	910.654	405.487	833.443	1353.12	1388.19	237.62	1	140.467	85.0983	75.9669	64.1023	14.1961	1	17.8108
RPL7L1	110.304	52.3865	46.8434	24.0472	53.2078	69.1554	33.7472	19.4566	2.7132	1.6308	1.52854	3.71106	1.5524	2.23463	2.08619	1.41226	1.41511
RPL9	750.051	931.773	771.324	916.015	779.732	1044.3	1210.14	1136.32	752.732	1.01698	1.10377	1.16034	1.08119	1.16368	1.10361	1.0345	1.05106
RPLP0	1300.06	3701.24	1567.85	1220.92	1101.17	2430.17	3279.5	3425.43	814.082	1	106.409	199.008	228.671	86.4179	4.60386	1	16.1269
RPLP1	626.312	935.588	679.282	380.953	1019.02	679.359	919.537	1466	507.674	19.3701	478.025	149.695	211.735	394.056	40.0886	1	41.444
RPS14	1615.54	1645.67	1767.4	954.081	1063.28	1868.45	1769.75	2027.73	1136.32	26.4273	229.492	278.258	265.744	228.979	25.8175	14.4327	40.4268
RPS15	254.655	765.857	341.541	259.967	300.799	556.781	505.595	537.873	195.337	7.1439	46.0624	81.6717	108.69	18.4019	17.5843	1.00234	15.3605
RPS15A	646.564	1023.12	612.675	456.463	582.985	700.526	1179.61	1139.58	434.364	5.4429	34.4709	34.3025	37.0213	163.658	2.71156	7.39932	7.47379
RPS16	474.904	563.531	373.5	284.521	382.762	387.552	465.33	698.862	174.771	1.00239	296.437	74.7617	81.6301	162.871	8.45611	1.00237	4.65556
RPS18	1816.17	3062.86	2725.03	2147.75	3151.97	3086.48	2580.38	3243.02	1656.07	1.00221	1.00232	1.00233	1.00233	1.00241	1.0021	1.00229	1.00227
RPS19	1320.5	2577.5	3343.89	1743.59	2441.88	2082.27	2564.75	3267.91	1841.12	23.0519	363.831	423.785	329.178	598.98	31.4127	1.00236	28.2746
RPS2	34.2482	184.061	63.4385	79.4174	74.003	199.498	164.559	204.553	173.183	1.06335	5.52618	12.072	23.7334	82.0218	1.03968	1.05702	3.09271
RPS20	666.223	653.095	579.324	470.746	423.492	471.692	403.738	963.372	436.871	11.4157	244.003	220.737	258.561	196.514	18.6015	9.58397	44.8256
RPS23	782.363	893.119	681.588	432.959	870.017	735.919	1338.46	1154.73	389.071	3.4178	153.862	77.1245	105.977	115.669	17.2294	18.9817	12.8259
RPS24	1014.81	1001.91	303.991	771.324	893.119	820.078	810.899	933.681	480.401	4.34015	69.6613	80.6494	70.5542	137.067	11.4096	6.7939	13.6845
RPS26	13.2049	16.4782	24.1557	6.39228	10.5595	12.9857	11.442	31.2757	27.1568	1.00226	1.00234	1.00235	1.00236	1.00242	1.00215	1.0023	1.00229
RPS27	1709.19	1688.46	1698.37	1157.46	1236.41	1461.27	1377.23	2165.75	928.188	1.00242	52.545	1.0024	1.00241	12.3679	1.41225	1.00232	1.00235
RPS29	493.036	873.247	553.457	325.299	346.089	415.468	711.655	1056.43	603.186	2.64998	71.8754	80.638	47.9666	64.2054	4.50776	5.66473	10.9852
RPS3	2794.2	3573.93	2394.68	1071.49	1867.99	2175.18	2371.4	3219.2	1414.28	1.15542	240.879	298.76	117.256	196.978	16.4534	10.2827	41.3339
RPS3A	1254.92	2076.71	1920.97	1972.31	2184.6	2383.61	1743.59	2348.12	1539.98	1.00248	63.0343	79.2452	138.126	155.357	6.89533	17.2705	14.5508
RPS4Y1	1	257.921	28.6779	1	1	31.6812	257.575	1	1	1	188.435	1	1	1	1	1	1
RPS7	255.927	330.057	190.92	104.022	178.278	233.611	354.055	357.378	267.75	1.05367	24.6628	11.8141	14.8901	26.1557	1.92463	1.07628	3.93095
RPSA	327.484	997.886	324.93	233.108	472.07	657.664	991.038	845.868	138.76	1.01594	1.0874	11.7065	10.3862	1.20898	1.71167	1.08292	4.12513
RQCD1	38.1971	74.6174	77.0345	54.8317	61.4326	53.9072	55.5062	82.6503	61.3089	1.0241	1.08208	1.08958	1.06907	1.14616	1.01084	1.05165	1.0342
RRP15	5.23872	2.4601	5.38453	2.3378	6.03603	6.2508	6.03737	2.79464	1.00278	1.00275	1.00273	21.5903	96.769	1.00282	5.08155	23.7266	3.40145
RSF1	267.75	230.313	86.3481	313.732	282.083	483.265	80.4272	71.1104	57.3964	5.48293	5.77398	23.8071	25.5261	1.00206	9.37512	60.0663	10.3516
RTN1	9.75882	336.163	21.9066	971.067	155.04	672.85	13.0941	1.00246	1.00249	1.00244	5.91724	1160.08	174.4	1.00243	1286.66	10.5385	6.48031
RUNX1T1	12.2462	33.51	7.72308	66.7996	25.8602	109.264	18.0003	1.69371	1.89872	3.73971	1.00252	330.182	1.00248	1.00252	15.5427	3.49879	1.00249
RYR3	1.00255	1.00247	1.00253	1.00255	1.00253	1.00246	1.00238	1.0026	1.00269	390.229	1.00262	1.0027	1.00262	1.00271	1.76042	1.00259	1.00259
S100A11	1.78242	1.55446	2.59835	2.0725	1.54678	1.43497	1.12427	3.60033	12.545	2.30782	76.3879	6.76971	6.7119	793.89	1.55292	11.936	3.56029
S100A6	1.00202	1.0019	1.00198	1.00196	1.00195	1.00188	1	1.00216	1.0022	1.00221	678.549	1.00213	1.00212	1.00223	1.00222	1.00215	1.00212
S100B	1	1	1	1	1	1	1	1	1	1828.92	1	1	1	1	1	1808.51	2869.33
SAMD1	2.96807	1.95593	3.10682	2.25412	2.37441	2.04993	2.04458	4.53973	17.8285	2.46454	6.32803	7.36639	7.07563	22.1062	1.59901	4.29329	3.7828
SAMSN1	1.56205	1.23168	1.84695	1.64632	1.38268	1.31007	1.0862	2.43671	7.32259	1.98162	4.27042	4.81838	4.69851	373.608	1.40789	7.52723	2.75212
SAT1	297.471	35.9343	466.708	183.066	638.333	263.908	406.589	19.7836	7.01548	10248.9	6679.93	1.00176	129.042	8503.17	847.493	1937.47	343.02
SATB2	4.6854	1.08209	1.04939	21.7866	68.5965	14.7659	1.02732	1.01347	1.01214	1.01132	1.00438	262.511	1.88033	1.0123	1.00276	1.00374	1.00447
SCD	52.6973	16.7016	12.5287	9.83252	26.2794	30.133	24.7948	54.979	37.7783	280.61	8.46164	67.659	181.569	126.803	1.00238	175.504	3267.91
SCD5	4.74194	1.44663	3.79955	8.76774	30.484	4.41309	2.41785	1	1	712.222	13.0927	19.7644	1	1	41.169	1572.79	1310.81
SCG2	1	1	1	1	1	1	1	1	1	9.36417	1	1	1	1	2394.68	8.51415	1
SCG5	1	1.6938	1	84.5672	130.741	160.625	1	1	1	1	1	182.272	1	1	2348.12	106.343	563.015
SCIN	1	1	1	1	1	1	1	1	1	1	1	1	1	352.289	1	1	1
SCN2A	2.48247	1	1	22.3839	3.45811	3.91177	1	1	1	1	8.03133	20.9617	1	1	409.871	4.39119	1
SDC4	1.04203	1.04386	1.08819	1.05423	1.02738	1.02666	1.03101	1.24225	1.51219	622.508	1.40319	1.33019	1.38702	1.71775	1.03808	1.20254	1.18738
SDCBP	1430.6	320.844	257.268	372.946	886.291	628.634	1303.49	159.321	74.4677	5.94757	133.409	92.4603	184.463	389.304	9.04426	347.557	5.26379
SDCCAG8	23.981	43.2348	10.8774	47.8871	125.965	43.5288	33.8483	4.30566	2.87832	7.3496	1.002	1.00205	1.00198	1.00212	3.17554	1.00201	1.00198
SDPR	1.08992	1.02892	1.19582	1.10355	1.05763	1.04532	1.01012	1.25756	1.84695	1.15594	91.3033	1.57343	1.57491	2.25791	1.05776	1.37374	1.31549
SEC63	6.24086	17.0817	83.3193	28.8274	47.5516	24.7101	16.3028	4.85358	3.01293	1.06942	9.31826	22.801	1.0291	5.70516	5.49181	103.451	18.6452
SEMA5A	3.34179	1.35729	4.65528	1.64963	1.72375	1.12743	1.87321	1	1	1	1	1	1	1	1	633.888	1
SERINC1	72.5401	13.0824	11.2955	90.5013	62.2967	52.6354	23.1672	7.5722	6.50269	29.0129	429.546	701.239	23.6165	37.2677	3771.07	157.02	842.724
SERINC5	1.0251	1.0251	1.01929	1.01051	1.01811	1.00722	1.00665	1.05204	1.12849	78.1283	45.489	45.526	9.16516	1.21279	5.66598	945.503	1424.08
SERPINB9	1.1017	1.07	1.28196	1.27366	1.12497	1.07974	1.01117	1.52357	2.11579	29.1621	103.855	1.66685	1.64877	1345.39	7.28944	1.95414	1.56611
SERPINI1	1.2602	1.16442	1.21768	2.08312	1.18284	1.26935	1.01326	1.33576	2.05594	2.63568	2.83561	2.02682	1.62823	2.51726	1081.91	1.57222	131.258
SEZ6L	1.54139	1.35898	2.32918	5.85947	10.7887	2.81468	1.27666	1.41291	1.74911	1.04962	1.19036	1.39612	19.411	1.42418	24.4824	185.139	1.16257
SFRP1	1.00242	50.0345	1.00241	2.03662	2.50262	13.4969	172.376	6.93076	87.0606	1.00228	1.0024	1.00243	128.48	1.00247	1.00221	1.00242	1.0024
SGK1	1.71712	1.21294	1.53768	1.24763	1.23567	1.14284	1.02558	2.06977	2.79505	1.5918	111.353	2.28624	2.02205	1455.47	2.10185	195.96	175.781
SH3BGRL	23.7334	12.1971	105.094	15.5419	33.6869	39.6241	13.3002	18.7088	1.00284	22.4731	173.024	1.0028	449.534	171.767	12.2269	195.845	16.0242
SH3D19	40.8676	41.9021	59.0386	25.0718	44.3759	26.808	47.3033	86.3505	139.358	1.90263	6.89724	2.59363	2.54008	4.84145	1.26776	5.22844	19.6691
SKA2	23.3831	55.1036	22.0536	38.7517	31.031	41.4306	51.1652	89.1732	67.6466	19.1255	21.0787	300.308	1195.88	28.6353	32.8549	14.7524	7.97377
SLAIN1	1.37049	5.71639	1.61884	10.2251	3.57067	4.17613	5.16051	2.8318	2.81762	1.63351	2.10564	2.61645	2.17822	3.34687	1.50979	80.1809	1909.08
SLC12A2	14.6863	2.02793	5.74478	5.05511	5.53601	4.31983	5.44624	4.35054	9.18605	13.386	227.519	9.64655	26.1501	1.00269	8.46674	15.8245	981.295
SLC15A2	1.00364	1.00275	1.00284	1.00279	1.5347	1.00272	1.00266	1.00393	1.0077	283.926	1.00427	1.00433	1.00466	1.0119	1.00275	1.00475	1.0036
SLC1A2	48.2617	2.62552	16.9835	3.97013	36.5816	6.69566	3.81433	1	1	9213.76	1	12.1377	31.8228	12.4656	6.12018	292.201	1
SLC1A3	11.8761	27.8954	74.4677	9.12077	404.367	14.5331	10.0064	2.72856	12.8705	6351.44	26.5364	1	330.057	1128.67	1	209.423	43.2186
SLC24A2	1.0022	1.00229	1.00217	1.00232	1.00214	1.00222	1.00224	1.00221	1.00235	1.00237	1.00231	1.00236	1.00231	1.00239	20.8213	21.7514	1311.06
SLC25A18	1.99875	1.00267	1.00275	1.00269	1.00272	1.00263	1.00252	1.00279	1.00436	385.011	1.00284	1.00329	1.00335	1.00526	1.00268	1.00363	1.0028
SLC31A2	1	1	1	1	1	1	1	1	1	1	1	1	1	45.6816	1	1	243.2
SLC35F1	144.366	10.241	6.32457	5.43962	36.2816	6.67913	50.5083	6.59095	1.00278	5.02633	1.00269	6.44791	296.016	1.00273	114.067	2055.32	1.00266
SLC39A12	1.59547	1.2473	2.02601	1.68722	1.48647	1.3305	1.09256	2.49171	7.86854	579.691	4.54315	5.0232	4.99364	13.642	1.49485	3.99871	3.27172
SLC48A1	7.71485	1	1	1	1.27328	1.18024	5.52458	1	1	564.95	1	1	1	1	4.62637	1	367.99
SLC4A10	2.65674	1.65686	1.16244	2.98729	1.51549	8.35036	2.37717	1.32928	1.85698	1.82431	1.67109	3.21527	1.46762	1.87233	150.185	1.47729	1.3042
SLC4A4	1	1	1	1	1	1	1	1	1	410.528	1	1	1	1	1	1	1
SLC6A1	2.45534	1	1.53522	1	1.20266	1	1.02687	1	1	463.418	71.6773	1	1	1	516.701	29.6324	21.7225
SLC7A11	1	1	1	1	1	1	1	1	1	441.951	138.158	1	1	1	1	1	1
SLCO1C1	1.03544	1.00405	1.01622	1.00832	5.49181	1.00459	1.00276	1.06272	1.12894	1165.95	1.07019	1.05814	13.1882	1.14877	1.00757	1.03344	1.03152
SLITRK2	24.9203	1.00448	1.37006	2.03431	16.4534	1.81662	1.07226	1.01637	1.01167	574.598	1.00544	1.00832	29.232	1.01358	17.769	253.585	99.3784
SNCAIP	122.908	9.6322	6.10738	4.01197	5.40231	8.54116	6.35378	1.00239	1.00239	1.00226	1.00229	1.00237	5.5148	1.00238	1.00211	1.00229	1.00224
SNHG1	25.608	356.419	22.9946	2.37644	116.241	89.6294	70.0321	41.5995	5.19343	5.1162	2.72211	2.32322	19.7119	3.11306	1.36823	1.94343	1.89008
SNRPE	100.539	182.406	116.241	177.68	125.122	588.404	1310.98	264.771	1	1	1	106.756	241.704	1	4.64718	7.44	1
SNRPG	481.733	825.841	584.791	418.38	250.216	490.734	1193.1	546.876	208.642	3.00409	1	26.0946	48.3606	29.7923	3.50551	15.2308	12.822
SNRPN	152.592	103.158	51.8798	65.7556	18.803	312.188	86.1776	32.9149	1	1	1	1	1	1	3.32328	1	1
SNTA1	1	1	1	1	1	1	1	1	1	291.879	1	1	1	1	1	1	1
SNX10	1.00167	1.00175	1.00159	1.00184	1.00157	1.00163	1.00092	1.00189	1.00198	1.00198	1.00205	1.00195	1.00189	1.00202	209.142	7.86943	1.13187
SOBP	1.95967	1.10709	1.00549	3.95601	2.82163	3.55775	1.00272	1.02032	1.02263	1.15479	1.01076	64.7071	1.01215	1.02608	5.5148	1.00743	1.01091
SOCS6	1.00283	1.00436	1.00281	1.00283	1.00278	1.00282	1.0028	1.00739	1.00941	1.00335	1.00542	1.0092	1.00504	484.509	1.00277	4.96161	1.00501
SOX11	74.1555	167.049	210.232	232.797	142.484	398.9	213.227	194.886	603.186	1	1	4045.37	5004.77	1	3.66142	31.6773	1
SOX4	1101.17	1354.93	444.41	1152.13	373.5	1116.94	701.418	620.358	1254.92	10.3218	451.047	9213.76	6502.67	64.0042	35.3333	209.142	1.02436
SP4	1.39275	1.86817	1.53249	2.12992	1.02294	1.52321	1.47149	1.26652	1.21101	1.04811	1.09538	1.16883	34.445	1.21888	1.0377	1.11346	1.0623
SPARC	99.6805	27.7513	191.36	6.50411	45.313	3.89432	17.2511	50.4078	1.00274	1.00252	803.985	1.00262	1.00265	1.0027	1.00248	14.8881	17.2379
SPARCL1	150.901	1.01563	2.12695	1.09006	3.71478	1.02156	1.00413	1.25538	1.46117	14800.3	2528.31	1.26185	1.38312	47.9441	473.503	1946.47	10.7224
SPCS2	98.662	135.42	108.917	111.901	476.258	316.17	223.342	102.166	1.15604	6.54644	1.12217	1.12297	9.95171	1.14416	6.14305	55.8775	13.8861
SPOCK3	1	1	1	1	1	1	1	1	1.00185	1	1.00185	1.00176	1.00173	1.00193	82.447	314.086	832.93
SPP1	1.00387	1.00279	1.00926	1.00416	1.00284	1.00284	1.0027	1.01214	1.06357	1.00801	1.0407	1.02626	1.02696	9213.76	1.00435	1914.13	5059.64
SRGAP1	6.06612	9.26915	7.95336	66.4668	25.9881	22.0787	8.04726	1.75734	20.1202	6.31889	1.13633	153.956	1.10461	1.18603	1.02251	1.86054	1.06386
SRGN	1.00889	1.00394	1.02407	1.01195	1.00508	1.0045	1.00279	1.03262	1.13938	1.02189	1460.04	1.08023	1.08064	7365.03	1.00551	77.8145	1.04906
SRSF10	838.053	572.222	139.358	361.02	529.086	776.773	472.846	405.465	267.75	3.40313	4.18693	7.3737	7.95336	9.32463	1.75662	3.83466	3.57058
SRSF6	518.212	653.095	838.053	714.221	504.675	1081.95	915.97	542.742	443.087	2395	3475.47	5717.15	11866.6	1338.62	2467.55	2256.94	3309.36
SSBP2	87.0606	211.735	95.7847	439.983	169.321	233.411	128.197	12.6448	3.80542	1.64916	1.74128	120.495	1.48511	1.87442	3.66142	1.4806	1.37305
STMN2	1454.12	1236.41	83.6749	3226.45	1645.67	3397.88	766.913	65.9905	86.8741	1.00332	1.00999	9731.33	10.6688	1.01969	1461.97	1.00439	1.00661
STOM	1.17857	1.16264	1.13371	1.15912	1.25527	1.04401	1.58929	1.18784	1.53992	707.683	2088.37	1.29034	1.31916	40.9986	1.04531	19.0072	1.16709
STON2	3.62016	2.55063	1.00235	1.0023	1.00243	1.00241	12.5725	1.00248	1.00247	1154.73	1.00236	1.00238	77.0345	1.00245	1.00221	1.00239	1.00233
STRN3	5.31097	10.2684	21.4149	22.5526	18.7453	21.0398	10.4025	16.1662	25.3498	66.2296	7.44511	269.415	726.859	1.00225	186.58	126.038	117.128
STT3A	40.1665	7.68	121.072	3.88007	8.1708	4.3443	2.94518	6.38508	1.00216	16.0208	1.002	1.00209	3.21261	1.0021	2.95817	1.00202	8.18415
STXBP1	13.1711	10.1125	3.27411	16.3508	6.92469	37.645	5.11945	1.00203	1.00202	2.62793	4.53598	157.364	1.0019	1.00201	575.773	1.00198	1.00192
SUPT16H	597.484	256.617	49.5252	190.603	25.9881	121.863	121.486	141.035	46.5814	6.37835	2.59771	37.1604	14.0386	1	14.6458	2.43203	7.59766
SV2A	1.00271	1.04254	1.00277	1.32168	1.30484	1.49422	1.00268	1.00281	1.00351	1.00279	1.00281	1.00407	1.00279	1.0039	93.406	10.0998	1.0028
SYNC	119.798	32.0576	66.4132	99.0561	11.0478	57.0823	89.3908	36.7184	74.9171	1.00231	1.00241	1.00242	1.00241	1.0025	1.00221	1.00238	1.00236
SYNE2	56.3346	149.526	56.9499	32.0759	42.7414	55.3748	210.416	57.4601	173.98	1.00434	20.2694	29.9073	239.347	1.03546	1.0041	1.01458	1.00732
SYNPR	1.00824	1.00278	1.00582	1.00407	1.00283	1.00375	1.00269	1.00821	1.04107	1.00712	1.03049	1.02453	1.02394	1.06553	1010.37	1.01809	1.02058
SYT1	85.4761	29.232	14.8309	164.335	27.6525	78.5063	16.7906	1.00254	45.313	8.44227	21.3911	154.175	1.46363	1.00245	2094.45	1.00234	13.8658
SYT4	27.942	8.83268	1.0024	107.05	17.9873	109.097	5.1684	1.00247	1.00246	1.00229	1.00237	416.706	1.00242	1.00245	44.6256	1.0024	1.00234
TACC1	1.28943	1.60376	2.69892	2.73819	11.6517	1	2.4082	1	1	35.0752	747.711	1	4.56757	188.571	7.74919	38.0197	26.3787
TAF7	26.1943	42.2442	27.8954	33.9216	19.5303	54.6381	46.3293	30.9759	9.04426	45.566	6.74037	187.016	595.538	1	93.0163	895.999	206.485
TAGLN2	1	1.00171	1.00185	1	1.00175	1	9.15804	1.00166	1.00183	1	8.22886	1.00161	27.0962	1.00182	1	1.00063	1
TAGLN3	3.12781	49.5252	16.1181	40.1998	10.165	62.5828	20.2623	1.00195	1.00184	1	1.0017	60.4128	1.00164	1.00185	796.598	1.00167	1.00148
TBCA	355.413	133.374	128.48	387.012	161.495	290.816	605.594	200.173	96.9749	19.6156	4.71278	26.6347	26.5068	1	24.1165	15.2176	20.4914
TCEAL2	5.52977	1.07653	2.23113	5.28327	1	1	1.49034	1	1	1	1	3.67907	1	1	567.025	22.576	1
TCEAL7	1	1.71303	1	1	1	6.23673	1.81526	3.66782	1	1	1	1	1	1	863.628	9.34409	605.014
TERF1	26.4059	50.2252	2.98222	116.122	8.42001	10.7436	42.3685	16.8234	1.00187	1.00185	1.00182	1.00182	2.15831	1.00178	3.07316	4.89474	4.94599
TF	1	1	1	1	1	1	1	1	1	1	2.05123	1	1	1	1	6.9824	1567.69
TFAP2C	1.0409	3.13466	1.07956	1.02902	1.03405	1.15419	3.85768	1.4459	38.6301	1.11232	1.10819	1.11327	293.738	1.25975	1.00832	1.0663	1.05567
TFIP11	110.304	1.24578	1.00284	1.00527	1.66135	1.00283	1.07352	1.01127	1.00971	1.00589	1.00533	1.0065	1.00471	1.01162	1.00346	1.00426	1.00381
TFPI	9.19728	1	7.96205	1	166.297	1	1	1	1	1	5.51767	1	1	1	1	1	1
TIAL1	1.00258	2.7542	1.53133	1.36784	3.68273	1.63332	2.64029	1.00276	1.00269	39.4053	70.48	219.452	381.675	1.00271	190.509	19.5628	244.533
TIPARP	1	1	1	1	1	1	1	1	1	6.05602	198.603	1	34.1278	1	1	11.1964	37.8449
TMBIM6	1306.71	939.252	1720.16	673.747	1023.12	643.483	699.687	694.11	96.9749	461.416	683.07	80.1282	118.015	245.572	105.529	283.848	345.622
TMED4	9.52352	33.6869	58.3541	24.5739	14.1142	13.1007	85.9066	43.2345	1.0026	1.00249	1.00249	1.0025	1.00252	1.00257	1.36469	1.00251	1.00249
TMEM130	1.00255	1.00248	1.00252	1.00251	1.00249	1.00251	1.00229	1.00256	1.00266	1.00255	1.00267	1.00266	1.00262	1.0027	72.8306	1.00264	1.00262
TMEM144	1.00245	1.00237	1.00252	1.00247	1.00243	1.0024	1.00228	1.00255	1.00266	1.97508	1.00267	1.00262	1.00261	36.9874	1.00256	14.119	3398.43
TMEM14A	1.79407	2.38037	1.00271	10.5796	2.62016	6.14999	1.43737	1.00273	1.0027	3.42581	1.00266	73.7807	1.00265	1.00271	779.732	1.00266	13.6512
TMX1	12.6161	4.36766	11.4678	1.28717	29.0459	2.80847	5.40308	3.22632	2.00462	56.391	1.48439	1.44598	149.184	344.499	1.29866	1.63599	11.7035
TNC	1.029	1.00436	1.01295	1.01002	27.2971	1.00476	1.00274	1.06424	1.11465	1.01222	1.04241	1.04522	45.5736	1.11888	1.00422	1.03435	1.02302
TNFAIP3	1.16283	1.16739	1.35484	1.24698	1.10869	1.15042	1.10774	1.55001	2.50547	1.40006	238.88	1.98075	1.97667	33.2128	1.12073	2.15075	1.62463
TOP2A	1.15858	99.2729	1.30969	2.75395	1.07092	34.3494	221.263	135.138	336.163	1.06541	1.2218	1.24812	44.2864	1.55008	1.01955	1.14795	1.12595
TP53	1.8624	9.03379	14.9731	1.17079	4.22233	4.32007	11.2493	24.1313	1.40464	2.41265	1.14749	1.12651	31.8876	1.30305	1.01295	1.06661	1.07411
TPD52L1	1	1	1	1	1	1	1	1	1	162.075	1	1	1	1	1	1	1
TPM4	30.5844	9.97467	64.3344	6.10019	7.90383	6.28964	14.655	7.70369	2.24351	1.13011	62.6056	1.56976	51.2848	1.76306	1.37862	1.33283	1.47924
TRIB1	1.00246	1.0026	1.00246	1.0025	1.00254	1.00248	1.06998	1.00254	1.0026	1.00262	1.00261	1.00255	1.00256	393.389	1.00239	3.21019	1.00248
TRIB2	23.9425	4.2506	7.28197	6.30877	31.8876	6.32177	6.13571	11.346	13.6848	3.85229	1.00259	1.00256	1.00256	1.00262	1.00251	1.0026	1.00254
TSC22D3	1.14249	1.03675	1.08338	1.07611	1.05597	1.04822	1.00425	1.22992	1.42018	2.71264	482.906	1.28893	1.25652	1.61883	1.65141	1.39254	1.85403
TSPAN6	6.55748	5.70447	6.20764	2.22079	3.33403	1.43235	97.1079	6.86687	1.00284	1.00279	1.00278	1.00277	22.9946	1.00283	1.00258	1.00281	1.0027
TSPAN7	7.53447	10.19	30.4304	39.2298	582.985	9.63279	3.26179	1.00384	1.00283	2600.51	3.47472	47.8749	1.00283	1.00309	5938.52	1117.24	27.5961
TSPYL2	2.61853	1.09705	1.06948	1.05419	1.02069	1.03543	1.00425	1.33869	1.39777	4.12686	47.599	1.22914	1.2237	1.58195	157.159	27.0996	2.09
TTC37	642.405	51.8798	96.1869	68.193	26.5539	236.058	302.727	27.002	2.00462	8.081	4.474	65.0582	16.006	1.05017	32.9113	17.4392	22.1257
TTLL7	1.00271	5.25971	2.99259	28.1352	3.97268	12.3019	1.88643	1.00275	1.00277	1.00262	1.00272	1.00276	1.00272	1.00277	6.62333	4.92395	407.657
TTTY15	1.09348	124.285	11.3344	1.05397	1.03669	1.46599	41.3311	1.4635	58.7	5.59163	1.297	1.13924	1.13702	1.3434	1.02462	1.08623	1.08611
TUBA1C	310.188	928.188	183.221	326.64	221.553	548.602	423.407	545.945	253.396	1.54988	21.1274	12.2324	72.0999	80.2325	1.75813	1.72066	2.10472
TUBB	847.493	3292.8	755.345	2188.64	1242.41	2873.01	2371.63	1816.17	965.338	1.00476	1.02506	10.1531	40.7146	1.05447	1.00375	1.0149	1.00818
TUBB3	16.2356	68.5965	8.85278	50.3285	23.1283	87.4328	70.2488	10.4441	20.0587	1.42482	1.74701	204.409	41.9021	2.62201	3.35225	1.4847	1.49211
TUBB4A	1.03187	1.04919	1.03616	1.78379	1.04947	1.27551	1.02772	1.08892	1.10947	1.04689	1.08557	13.969	1.05898	1.1373	9.08929	1.03867	268.626
TULP4	1.74582	4.84322	3.37977	4.38949	4.77307	5.47423	7.14661	5.71343	8.7275	2.44686	1.09541	100.224	42.5685	1.00404	6.1939	67.3605	104.676
TYROBP	1	1	1	1	1	1	1	1	1	1	1	1	1	235.59	1	1	1
U2SURP	347.904	222.088	136.301	459.398	352.576	399.359	535.834	220.029	213.285	34.5707	25.6815	65.5041	28.8966	32.2	21.1827	44.0811	35.7013
UBA52	413.238	402.074	213.769	270.085	350.663	247.55	296.749	560.104	147.564	8.29386	124.683	78.9364	72.9721	125.777	17.1562	2.89713	32.2456
UBAP2L	9.20888	17.8555	68.1938	18.2308	17.2807	12.7882	61.3049	3.46593	1.00239	3.67345	1.29407	1.00238	1.00236	1.00241	3.11385	1.00237	3.10678
UBE2B	207.126	194.878	17.1562	708.367	229.203	417.709	1310.08	101.528	5.32227	9.98775	200.441	166.519	72.3947	1.0392	366.366	151.413	162.456
UBE2C	1.00432	172.412	1.00673	1.00393	1.00283	1.00995	137.266	1.0542	1.02908	1.00346	1.00995	1.01055	1.0218	1.0285	1.00277	1.00616	1.00473
UBE2E3	2.70973	32.2274	9.35187	154.038	20.3499	114.002	138.409	13.9409	1.00216	1.00191	1.00206	2.93558	70.5542	1.00211	7.25613	1.00207	1.00206
UBL3	1.19164	1	1.82084	1.05246	1.15374	1.0755	1.16181	1	1	9.91851	10.2351	1	8.9253	17.9777	3.3974	164.994	119.392
UFSP2	115.739	12.6885	14.2803	1.06491	4.25571	3.26156	32.6374	1.57902	1.33251	1.2673	1.17968	1.21338	1.45828	1.33214	3.32857	6.19644	21.722
UGT8	1	1	1	1	1	1	1	1	1	1	1	1	1	1	1	3.96984	775.333
USP24	3.3315	1.87268	3.42328	2.6109	4.92152	2.58822	3.41877	2.91138	1	11.5708	3.62043	15.7197	4.72176	1	8.9253	282.542	6.13482
USP8	273.709	30.65	7.37819	111.364	22.1582	6.26921	10.4901	1.53281	8.97011	26.8647	1.13744	1.14992	17.4423	13.2756	4.47242	54.271	8.80033
VAMP5	1.00277	1.00269	1.00345	1.00278	1.0028	1.00271	1.00259	1.00397	1.01293	1.00406	451.259	1.00608	1.00616	1.01879	1.00274	1.00484	1.00408
VCAN	238.755	295.223	207.126	139.818	217.862	131.799	199.048	130.461	108.465	1.00394	1.00927	40.3422	72.8306	1.02057	1.0028	848.075	1.00425
VIM	158.247	299.817	170.843	128.76	193.119	102.854	743.967	215.892	176.337	86.8425	618.356	1.32739	93.5943	1.49668	1.03206	1.13117	1.13316
VIP	1.02622	1.00841	1.04729	1.03126	1.0151	1.01342	1.0038	1.08388	1.33923	4.5212	1.30122	1.21271	1.21136	1.49574	53.9353	1.13087	1.23291
VMP1	2.71856	14.6667	87.4287	7.45662	16.0512	12.7449	156.614	1	1	1	92.9857	1	1	111.412	6.0805	30.638	2.32501
VSNL1	1.4083	1.15985	1.35446	1.48655	1.30558	1.1882	1.01957	1.49705	2.55988	2.30616	2.16969	2.37617	1.97588	3.24435	1470.03	1.89456	1.97094
WDR75	34.7596	2.27332	1	3.42744	1	3.79485	1.39861	1.38891	1.00167	1	1	1	1.00163	1	4.17318	1	1
WIPF3	1.00248	2.25529	1.65213	3.89436	3.86713	3.92477	5.0473	1.00262	1.00268	1.00262	1.00256	45.9363	22.489	1.00264	2.85474	1.00253	1.00253
WSB2	33.3927	4.85184	3.03075	50.0859	19.4405	16.9841	6.09991	6.37737	1	13.6826	1	223.805	40.7146	1	50.9556	1	29.6974
XIST	117.495	1.00747	1.05427	55.1881	584.791	1.04354	1.00332	11.9489	1.30277	1.04588	1.158	31.2261	20.7238	1.60597	3.11148	28.195	5.05894
YWHAG	7.42161	4.57515	2.80004	51.954	13.6678	21.6532	13.9221	8.94246	10.3	5.38332	64.334	499.498	105.094	84.6548	529.086	53.7423	174.611
ZC2HC1A	35.048	40.1665	8.12301	82.8605	57.8674	105.818	18.9709	7.74468	1	13.1593	1	384.447	34.3721	1	16.355	20.5741	1
ZC3H11A	312.523	103.158	12.4974	20.3898	45.7396	72.7521	265.217	53.5202	50.8632	18.9716	56.0343	15.6979	18.4509	55.5625	5.2333	55.1279	9.9702
ZC3H8	82.2865	4.96269	3.92791	2.37436	4.49989	10.9338	20.3818	1.05597	1.02726	1.01188	1.01251	1.02871	1.01134	1.02973	1.73201	1.01655	1.00539
ZC3HAV1	1.00258	1.00259	1.00258	1.00247	1.00265	1.00257	1.00226	1.0027	1.00268	1.26233	146.685	1.00261	1.00263	1.0027	1.00246	22.8096	1.00257
ZCCHC6	2.06689	4.08211	2.20857	2.48631	3.93731	2.1475	5.75787	3.4445	4.42151	3.20223	3.18941	4.10964	3.29513	529.293	1.6912	5.06286	2.69139
ZFP36	1.15445	1.01687	1.14867	1.06552	1.03914	1.03017	1.00533	1.24457	1.6248	12.4221	1190.66	1.38424	1.40515	90.0077	1.04928	1.64203	1.67011
ZFP36L1	49.6391	20.3185	40.9428	4.44306	10.2278	4.01829	194.766	30.836	61.1954	63.5553	301.589	1.00284	22.795	165.425	1.00267	49.9973	1.0028
ZFP36L2	9.30356	2.23692	2.65521	1.2277	1.00404	1.00283	2.04159	2.15373	1.00951	6.84091	362.559	1.00284	18.2013	859.943	1.00266	462.985	19.0612
ZFX	1.19921	3.74644	8.47638	3.60322	4.4801	4.24506	3.24418	3.26831	1.23403	8.12907	1.26956	16.5972	116.494	11.1151	3.87344	88.5443	3.41343
ZNF121	12.038	12.9974	51.1854	42.1547	14.7687	13.9942	6.02083	30.4032	7.15812	1.00253	1.00262	1.00268	1.00265	1.00272	1.00249	1.0026	1.00259
ZNF638	739.894	497.337	734.723	506.528	734.723	657.554	745.13	308.212	286.325	68.5965	23.6457	75.2887	62.1808	1.00243	43.1485	55.7976	140.612
ZNF83	5.47046	2.75044	38.1971	22.1751	3.79955	4.08224	106.517	1.00257	1.00249	3.77694	1.0025	1.00245	1.00246	1.0025	1.65493	3.27179	1.26144
ZNF91	38.1971	40.8676	7.60968	112.63	41.8156	37.088	19.7442	8.50301	12.8353	1.00252	1.08473	235.036	12.038	1.00252	5.82939	14.7232	1.00249

## Sheet: Tabel_S6_2
Supplemental Table S6. Cell type gene expression signatures used for CIBSERSORT cell type deconvolution analysis based on reference panel B.
Gene expression signature in panel B	Ex1	Ex2	Ex3	Ex4	Ex5	Ex6	Ex7	Ex8	In1	In2	In3	In4	In5	In6	In7	In8
ADAM33	1.01199	1.00519	1.02658	1.02216	1.01759	1.01303	1.01039	1.01386	7.50538	11.2592	1.07485	1.02494	1.01275	1.01212	1.05713	1.03834
ADAMTS17	9.8244	5.7891	19.9591	7.76239	7.97773	7.97337	9.5548	21.9277	20.0136	83.1036	32.1797	8.44781	7.71002	543.875	65.9801	35.6689
ADAMTS3	32.2115	2.81899	2.97068	4.65708	2.12743	2.05851	45.7947	27.3935	2.35197	1.67026	2.69001	1.75713	1.81844	1.69916	1.93987	2.32743
ADAMTS6	5.30321	5.25412	7.10283	5.21246	4.46033	6.07477	4.20449	3.95769	40.4003	33.2325	122.253	5.24948	4.58013	5.89146	33.1609	9.3062
ADAMTSL1	7.34187	9.40189	11.1213	5.35503	9.50632	147.642	6.58064	6.14263	11.8725	7.69886	8.26825	8.70256	6.92833	6.43957	12.9616	16.7409
ADAMTSL3	10.5321	6.7895	6.08924	7.02598	9.21021	20.3625	9.85045	17.6493	13.8609	5.67469	8.44042	176.219	89.2548	4.71505	16.7728	14.5619
ADARB2	14.3182	11.7912	18.0092	15.9275	13.1019	21.1418	16.3674	15.3783	7858.69	7104.93	3866	7858.69	8395.03	16.4096	24.5887	24.4343
ADCY8	1.10802	121.02	29.4292	4.60262	1.90603	3.37112	2.71989	1.32849	34.0935	103.74	10.9943	31.7136	32.5894	198.701	171.524	128.253
ADCYAP1R1	1.60201	27.6087	5.56819	1.97945	13.6417	20.7074	3.12906	3.88005	74.0012	110.623	132.482	50.8796	105.994	202.933	50.4627	97.4829
ADRA1A	1.01384	1.18301	1.01365	1.0131	1.04914	1.06989	1.00421	1.01039	245.918	272.057	238.192	243.155	199.896	79.22	146.574	6.41684
ADRA1B	8.16674	1.55225	1.66604	1.81657	1.93241	6.69524	15.5584	29.7821	23.0297	79.6447	11.3476	2.57943	1.41615	1.4007	1.72151	1.63007
ALCAM	36.1029	38.7707	60.832	150.611	14.4871	21.763	14.7557	33.8547	79.4134	1672.45	17.899	25.6336	142.32	63.3611	35.872	146.742
ALDH1A1	1.84104	1.47816	2.98413	17.5878	2.10809	1.62775	1.83884	2.64928	2.64324	2.25534	1.80918	2.11256	1.33698	1.84669	2.35546	2.92861
ALK	15.4065	13.6411	23.8397	12.8436	20.0644	18.1566	16.7777	50.3549	49.9321	84.5704	24.944	1031.28	1278.09	178.044	221.383	166.338
AMOTL1	1.9519	1.67884	1.79057	2.1133	2.63423	2.52057	1.45173	1.572	15.552	12.0585	12.9136	8.80315	38.0371	90.9047	55.0226	14.4746
ANK1	6.90254	4.59552	13.6462	10.9715	8.86163	6.06377	6.1488	5.04924	50.0118	242.016	246.628	45.5493	194.492	373.617	106.762	186.476
ANKRD18A	1.0719	3.34069	1.01671	1.00525	1.90614	11.9326	1.77283	1.15911	1.02624	1.00857	1.37579	1.00994	1.01039	9.09492	1.01747	1.01386
ANKRD33B	53.6688	41.4775	20.5193	18.2799	66.0886	72.7572	82.0957	72.3635	2.78456	2.45375	2.89913	2.87884	2.25534	3.54166	17.6037	6.69537
ANKRD55	2.43741	2.05517	2.57227	2.9669	2.39619	2.8857	2.94923	2.19213	53.5602	33.5199	31.0454	148.765	192.287	4.75001	317.579	67.8487
ANO1	1.63623	1.10358	1.47051	1.64004	1.21933	1.35696	1.35565	1.25555	2.6731	2.38182	22.1688	3.34975	64.5847	5.76145	1.81264	1.92168
ANO3	18.5875	154.55	15.6426	97.1172	85.4005	96.2856	126.73	6.26347	12.1931	6.28403	9.73358	9.13425	5.66089	6.13442	13.8287	10.7802
ANO4	27.1956	12.9832	15.3802	12.6082	30.1772	76.265	43.472	33.6358	314.76	643.814	588.266	203.41	13.704	509.503	296.332	297.895
ANXA1	1.16173	1.10212	2.83418	14.0994	1.27695	1.20701	1.15341	1.35235	1.55589	1.2538	1.46071	1.36817	1.18327	1.13303	1.56987	1.55382
AP1S2	1.10657	1.65793	1.18041	1.02064	1.21933	1.01258	1.01498	1.34156	67.8263	64.3613	53.1787	135.7	85.8223	1.94129	1.0325	1.52881
ARAP2	178.351	114.053	138.19	161.604	194.614	45.6258	106.004	469.746	5.42051	3.4622	133.373	4.33934	12.0927	2.72015	4.92741	9.47378
ARHGAP22	4.24359	22.0763	7.98336	2.37432	8.38004	54.4271	21.347	17.6114	3.13358	4.9283	3.00199	1.67382	11.4814	4.82371	1.81762	4.67159
ARHGAP24	4.74127	6.8142	16.0535	7.11939	8.32996	5.65528	6.25874	4.98147	5.79171	101.733	12.1726	5.25706	3.72161	5.48588	17.8005	9.58233
ARHGAP28	2.81958	8.75487	2.28194	2.56567	2.8539	2.44588	2.9031	2.2213	35.6036	40.5936	18.6881	1.76096	1.90306	2.28038	4.06551	5.79259
ARHGAP31	1	1.00458	1	1	1	1.43383	1.27565	1	1	1	1	14.606	50.2524	1.06489	1	1.00594
ARL4C	1.25263	7.11087	6.38477	3.66515	1.66698	1	1	1	220.431	443.121	244.363	296.44	248.452	99.0964	23.3117	73.892
ARPP19	317.842	75.4011	154.516	112.503	98.3957	67.4214	144.998	249.099	17.2044	14.5845	5.49213	24.4415	14.8541	6.78355	18.9017	26.3885
ARPP21	979.771	1401.98	1381.59	991.118	1492.93	1426.64	977.763	1027.09	318.746	612.858	701.633	4.77894	3.57028	2.39765	3.98463	6.28589
ARSJ	1	1.53158	1	1	14.309	1.36729	1	1.14484	1	1	1	1	1	1	1	1
ART3	16.292	1.29104	1.60977	1.32898	1.44035	1.10719	3.31365	1.96942	1	1	1	1	1.49946	1.16774	1	1
ARX	1.08477	1.04307	1.2607	1.14765	1.13735	1.11186	1.06774	1.10785	3.81413	5.97275	9.439	14.7812	35.6365	91.4682	39.2708	38.046
ASAP2	19.5234	9.45382	6.18729	4.90625	77.7721	208.027	21.7752	13.7512	8.96344	3.70743	6.60872	13.4175	19.6094	12.5611	12.2341	8.63313
ATP11C	2.42624	2.83859	3.40962	2.84235	2.24393	2.36417	2.06394	2.47805	7.98024	3.07423	2.48939	65.2372	79.5522	2.19294	2.91968	3.225
ATP1B2	1.20573	1.03851	1.28126	1.68248	2.53998	2.0191	1.29802	1.45969	124.128	121.879	272.314	240.913	174.937	2.24243	28.016	71.8222
ATP2B4	271.387	46.2264	9.63563	9.39516	186.642	244.92	191.454	54.0796	25.9119	5.92422	6.78564	9.67083	6.46017	4.61227	9.28683	14.5738
ATP8B1	1.52667	22.3739	3.92335	18.5133	21.4756	12.5655	26.7585	80.3149	2.04054	3.49529	1.99182	1.95011	1.85429	2.52631	2.19035	2.46089
B4GALNT3	18.6622	19.1954	4.62622	23.8998	30.9615	116.922	81.3087	113.401	3.5015	1.76409	3.15331	3.20203	1.74555	2.19855	2.35937	2.67067
BAIAP2	201.526	67.6777	62.9844	41.9594	117.703	326.611	206.8	253.532	19.6379	14.1212	11.0158	31.5917	21.3958	9.65487	50.1136	24.3304
BCL11B	9.67492	4.06474	13.054	5.85945	6.29489	97.4151	12.1693	16.3664	91.3941	7.48623	8.25837	398.426	308.278	107.718	97.9508	80.0104
BHLHE40	37.3768	33.1898	70.3487	30.8893	35.323	2.00127	3.52031	8.34582	1.27484	1.1194	1.19678	1.15899	1.11203	1.46135	2.18302	1.36479
BMPER	61.8856	201.226	79.0551	164.718	314.058	401.85	240.94	227.856	30.5833	6.19462	13.3447	46.9297	84.7763	14.72	36.3675	22.5314
BTBD11	7.76445	4.58872	9.10341	5.53061	7.87347	7.33001	5.40832	6.27055	249.945	207.096	483.564	31.9647	22.9831	924.118	15.0081	101.724
BTBD3	105.926	13.2517	40.9089	2.9883	3.86951	5.20247	4.62528	13.652	6.88363	1.14054	91.4834	1.91654	1.54795	12.7897	1.63751	4.97309
CA1	1	1.02767	1.1417	1	1.33734	1	1.15762	1.04307	1	1	1	1.46671	72.1076	1	1	1
CA10	376.69	975.939	151.99	8.68872	14.1809	73.7051	405.694	667.785	13.106	3.68422	5.89502	5.90578	4.28255	3.74783	8.29084	6.76214
CA13	1	1.06933	1	1	1	1	1.4079	1.94395	1	1	1	1.0071	35.523	1.07622	1	1
CA2	1	1	1	1	1	1	1	1	1	1	1	13.2147	32.6993	1	1	1
CA3	1	1.91043	1.5282	1.00831	1.44171	1.03929	1.43056	2.3323	1.23866	1	1	2.56454	193.815	1.00954	1.07738	1
CA8	1	1.00285	1	1	1	1	1	1	1.25611	1.07784	1.44813	1.0428	90.7665	1.1686	1	1
CACHD1	3.25508	5.30606	3.45019	5.75468	3.78295	4.51868	26.1694	95.5268	3.31072	5.57532	3.1947	2.39624	2.11208	2.48197	3.66503	5.05397
CACNA2D3	677.265	1338.88	520.387	225.818	657.597	988.918	848.383	879.429	533.116	55.3132	421.579	78.0506	12.8884	11.109	515.218	290.015
CADPS2	137.004	685.978	510.357	215.57	732.022	381.042	211.314	690.378	15.5159	9.26358	14.1871	12.2836	7.21874	9.93811	20.1936	18.2134
CALB1	1	5.16541	1	1	1	1	1	1	1	1	1	1	15.2408	1.1017	167.182	1.00486
CALB2	1.1702	21.0664	1	1.21101	1.64969	1.76028	1.63943	20.6598	28.9277	289.578	120.434	1.01702	1.11467	1	1	1
CAMK2N1	661.648	125.225	414.161	406.397	57.5269	13.8186	93.0382	144.83	86.2206	125.555	239.415	29.3456	92.5328	101.419	206.032	109.747
CAMKK1	183.525	50.3854	73.2306	88.3651	46.4104	77.8965	84.7032	87.3207	3.29618	6.64948	1.86232	13.539	9.83174	3.46205	3.2753	4.49527
CAMKK2	220.513	113.298	218.932	160.344	176.727	36.674	54.8157	235.676	5.27681	2.53167	3.03278	24.8046	15.0536	47.7077	16.4318	25.1052
CBLN2	766.264	74.4706	3.11159	1.49445	11.7635	19.1815	223.111	376.321	1.98664	2.02488	3.64634	1.81092	1.70463	1.39749	2.31463	3.04335
CBLN4	2.15638	1.00423	1	2.37247	1	1	1	1	1	1	1	51.8311	1	1	298.574	1.89204
CCDC141	4.15367	2.56902	4.76565	3.36482	3.67004	3.47285	2.47144	8.33248	5.05737	53.7741	14.8336	3.60439	2.95515	3.24803	4.3038	4.51724
CCDC88C	27.8378	2.03221	2.1149	1.83046	2.01093	2.09564	1.57082	2.13368	3.25402	2.31067	2.51944	2.56546	2.20523	1.78748	2.42475	2.10184
CDH10	12.5331	131.83	18.3937	123.422	228.607	16.3044	93.4055	67.9322	74.9995	85.3248	166.755	1.87923	1.49408	2.16173	27.6169	37.1496
CDH11	81.4425	1.95938	6.22099	7.20316	47.0563	183.974	117.962	20.9008	8.0633	30.8577	4.27864	9.35895	3.35441	26.3945	3.45152	6.91546
CDH22	254.208	79.7444	36.2172	16.2702	23.8896	7.09295	76.9169	53.6945	3.87802	2.6897	2.23638	3.34233	19.0154	2.4375	1.86588	4.75271
CDH7	4.98905	2.24793	10.5431	26.847	28.3021	12.6075	4.14326	3.5464	14.4578	14.4464	6.75374	6.09616	4.67365	197.177	101.516	62.5847
CDH9	259.012	24.7055	9.26762	8.57177	4.56704	66.2565	182.04	3.88969	128.979	487.735	3.7177	12.0552	25.2667	59.1036	539.226	377.99
CDHR3	2.48765	70.3276	5.73742	21.7438	40.1949	14.2042	4.89488	1.71145	16.9995	69.7695	2.50148	78.607	352.396	3.48054	2.59179	2.42371
CDK18	1.00023	2.77331	1.00011	4.65012	8.64301	1	1.00057	39.5591	1.00313	1.04008	1.00085	1.01609	1.00057	1.00085	1.00034	1.00023
CHD7	3.83753	3.21044	7.62114	4.27692	3.79258	3.64545	3.15298	3.40587	8.4651	6.29661	91.1194	5.30416	4.59273	4.08925	6.51336	6.91617
CHGA	15.6938	23.2184	119.299	41.2133	40.6371	6.57958	3.9606	1.8345	3.2337	15.158	6.21162	8.69142	8.19517	31.8353	3.29296	9.86683
CHN1	1889.47	1073.63	1903.63	1087.24	1281.3	797.949	877.9	530.852	32.0124	10.2669	24.0236	31.2094	18.0662	265.859	341.61	305.003
CHRDL1	2.15023	2.65723	2.66291	1.42687	1.55435	1.60079	1.36238	1.58829	2.2243	1.55613	1.87197	15.1601	80.2327	1.53612	2.19899	1.92664
CHRNA2	1	1	1	1	1	1	1	1	1	251.448	96.947	1	1	1	1	1
CHRNA7	2.55068	2.17648	3.14984	2.40623	1.96045	4.30349	2.59233	2.75693	61.0299	99.2244	5.68222	3.5263	2.8431	2.03368	2.94263	2.74513
CHST11	6.27179	6.17083	14.2719	13.4701	4.8132	12.9091	15.9725	94.479	284.204	24.343	175.406	317.204	260.536	10.1253	13.2998	15.904
CHST8	2.16068	2.50902	1.68647	1.91251	8.1621	1.98177	12.6913	1.88034	1.97291	2.19623	2.46948	1.76964	1.94533	1.938	2.22881	2.11938
CLMN	1.46245	76.3138	3.97899	1.65779	1.85546	2.99207	1.75636	1.82507	2.14372	1.78755	2.22194	1.61064	1.97392	20.2014	1.72445	2.71916
CLSTN2	99.0522	406.772	203.456	377.73	1142.79	1338.53	983.361	1809.71	62.6359	316.533	42.0286	286.197	76.5575	52.2711	72.3492	61.045
CMAHP	2.14786	11.9517	3.13041	23.706	2.94538	2.30484	2.77512	2.24106	2.28886	1.67769	1.87484	2.12556	1.73527	1.83045	2.52522	2.51378
CMTM8	2.29905	1.73458	2.57463	2.03715	3.42709	2.34593	2.50341	1.85194	2.89251	3.71049	2.63173	4.22596	8.72083	3.68912	118.652	44.7145
CNGB1	1.89841	10.2655	1.84727	1.51887	1.75594	1.50081	1.8831	1.56864	1.90141	1.44629	1.7822	1.57704	1.36956	1.41862	2.21165	1.65526
CNNM4	9.4601	4.93984	8.26869	14.2187	20.1132	8.94505	19.5006	179.978	6.25909	7.35921	7.84598	5.74246	6.6225	4.3124	8.10317	9.11818
CNR1	15.997	1.24026	1.37107	16.6038	1.84296	5.19441	42.4471	1.17034	701.563	840.194	79.4861	87.6349	1.77724	1.46527	1.61445	7.89474
CNTN3	226.7	466.05	118.841	43.4321	279.128	15.2285	180.499	21.207	52.5559	297.226	213.566	3.91764	2.82516	12.5492	8.60641	46.8039
CNTN6	3.10194	1.89859	2.76617	2.83721	2.80422	2.45178	17.268	31.848	7.50566	6.05039	172.19	2.15169	10.0909	16.9922	70.3488	4.83279
CNTNAP3	1.32177	3.5738	1.0774	1	1.6173	12.2108	3.74135	3.17124	1.57625	3.51772	1.12095	1.22801	1.13708	46.1092	4.04319	2.49035
CNTNAP4	4.43372	3.23171	6.69979	108.49	47.2913	111.966	7.18127	42.4241	389.643	800.292	112.312	446.981	312.443	4.10555	19.258	19.8995
COBLL1	1.71262	158.321	17.5824	130.722	3.25364	1.67867	1.39618	1.45969	2.84493	63.961	2.07719	1.73889	1.56561	3.23798	2.00518	2.79643
COL11A1	2.46077	108.79	4.82816	9.31328	98.267	43.7911	2.62494	2.41835	5.47131	193.469	38.2836	2.76187	2.35797	2.52213	2.97649	3.46268
COL19A1	4.95649	18.2335	12.2675	8.21115	6.96172	5.66877	63.3863	30.051	5.55647	3.03725	4.5404	3.47038	3.1061	4.86909	337.483	52.8239
COL21A1	3.7751	4.12798	8.43572	3.52826	4.29713	4.69525	3.31826	3.0753	52.0975	33.2457	156.831	5.47834	3.21002	4.31082	6.25796	7.49602
COL24A1	39.1523	4.94883	9.31771	4.85623	9.02802	154.542	63.678	7.38074	10.5528	4.88214	6.28588	6.41416	4.20078	4.13824	18.7616	7.59363
COL25A1	12.1498	8.06421	14.2568	9.43529	11.8869	15.5789	10.0015	11.0208	35.3546	14.5095	13.4499	79.6235	157.812	9.41962	469.871	174.609
COL4A1	2.30581	2.68914	1.54694	2.14161	2.18812	2.00133	1.23724	1.46301	2.66825	1.92292	1.78104	5.994	89.9113	5.70027	3.2073	4.52381
COL4A2	3.94419	16.3435	3.18013	2.03327	2.53247	1.70368	1.60809	1.65996	1.6966	1.34126	1.61471	19.3974	213.282	27.9074	16.9192	5.5257
COL5A2	1.72	412.713	4.80138	16.4349	1.98729	2.53413	1.89361	1.62538	3.6742	2.16087	1.72047	3.56334	1.82317	2.34518	2.27961	2.94802
COL6A1	1.32675	25.995	2.27919	92.4596	2.0896	1.29463	4.01907	1.26015	1.50442	1.20475	1.43925	1.35196	1.359	1.10188	1.83614	1.69021
CPLX1	5.74843	11.3648	24.3952	18.0378	16.8537	9.47027	10.1654	10.3454	6.61317	16.7304	10.7866	3.31468	9.69834	115.957	53.9245	27.2535
CPNE2	3.10114	1.82898	3.67512	2.87379	2.65363	3.49196	2.9247	2.48074	6.64038	5.89554	49.1796	3.26498	2.54637	2.35797	5.76809	4.14962
CPNE4	49.3237	623.143	287.047	210.501	811.518	31.1304	113.731	475.102	13.1535	8.19961	19.5056	9.95514	6.29028	6.66773	54.6011	19.5119
CPNE5	65.0096	5.95994	12.986	103.58	47.7482	74.9377	91.8331	338.02	4.36721	2.11424	2.47513	4.20697	3.67321	2.37905	7.98293	9.22424
CPNE8	24.181	25.2324	11.4129	46.8859	114.472	107.179	17.3704	2.29547	5.61206	4.51741	3.39991	4.64362	145.324	2.32817	5.78811	7.78101
CRB1	3.25046	5.08892	5.64638	4.01703	5.13474	7.111	7.07165	6.71791	10.6208	18.6379	15.991	5.3907	37.7944	15.8053	76.801	59.6322
CREG2	284.865	141.697	236.141	411.751	78.5055	37.5117	139.025	152.91	16.6422	79.4612	81.9613	19.9208	15.6181	20.5718	53.3934	92.2809
CRTAC1	6.32141	6.35734	14.1612	4.75528	5.00264	10.7734	7.39443	133.499	13.6782	5.87649	5.44291	41.5141	149.639	61.1181	52.1096	32.7439
CRYM	14.2277	54.7151	4.97982	4.90318	28.4464	8.41595	6.96778	2.72151	2.0431	3.3805	2.30011	1.68132	1.7464	1.51133	1.74829	2.13795
CTNNA3	42.8737	48.3172	43.3548	52.7832	29.079	41.6337	39.9241	814.036	33.7987	55.9389	24.7817	76.0867	18.499	38.4218	74.3839	57.715
CTNND1	2.84663	100.875	44.576	52.622	16.808	4.93956	10.7978	27.0242	2.25681	6.86192	5.0404	3.65967	2.70036	1.56777	1	5.71889
CUX2	563.537	816.591	510.832	18.7966	7.14298	8.04187	5.05686	6.62255	9.06389	6.16205	7.54096	8.56129	11.4319	282.559	313.65	81.8628
CYP1B1-AS1	12.1431	2.54112	1	1.18209	1.04028	1.03724	1.12947	1	1	1	1	1	1.10137	1.06411	1	1.79029
CYP26B1	1.0092	1.00079	1.01856	36.3052	1.11249	1.01229	1.00438	1.00145	1.01386	1.00306	1.01039	1.00686	1.00085	1.0013	1.0113	1.01055
DCC	76.6741	1802.27	601.048	2150.31	435.087	73.0061	388.524	36.821	357.456	493.584	273.749	175.726	266.102	48.0275	68.2757	83.8626
DENND3	70.8366	67.6911	36.3017	33.6745	29.7254	51.6006	133.981	74.6091	6.33775	3.55212	2.84886	4.79973	3.21128	6.06464	5.75209	6.02742
DGKA	38.7471	1.82182	1.02115	2.43251	1.11657	1.00085	4.90116	2.26657	1.04941	2.73015	1.38306	1.73409	2.37792	1.37575	2.35623	1.58812
DGKD	2.23637	1.66396	2.22743	1.44756	1.78126	2.90496	1.47613	11.4739	52.4837	59.2106	64.1239	320.174	194.399	112.481	37.1015	18.6851
DGKG	175.11	5.09144	9.8913	5.30569	6.24305	456.82	367.005	52.6705	16.1907	45.2758	143.889	7.35872	203.224	10.3147	322.787	49.1479
DIRAS2	62.211	13.3293	25.9141	25.8153	114.218	163.057	46.7067	2.08077	7.02217	16.5827	7.57518	27.2242	3.10926	1.25427	2.03222	3.79369
DLC1	14.8039	33.0985	74.1963	18.4875	67.4863	840.563	35.4958	20.6261	66.9171	113.735	50.4556	19.6125	21.2581	126.563	85.1891	106.013
DLX1	1.00841	1.0013	1.02353	1.01546	1.01096	1.01039	1.0044	1.01005	37.1716	50.6066	60.0846	16.1646	14.9104	3.85835	14.5735	7.14952
DLX6-AS1	1	1	1	1	1	1	1.01206	1	459.727	515.994	337.745	561.237	327.614	53.3479	3.52659	32.1979
DNER	17.986	20.103	24.8012	30.161	49.6053	27.2284	35.0435	18.0184	1309.18	738.541	830.652	3472.92	1542.96	615.711	200.841	332.63
DOCK10	4.13504	2.68041	3.10796	2.64927	3.03631	4.5848	2.54771	2.89941	348.268	148.408	228.109	568.32	306.826	5.16659	182.147	9.96323
DOCK11	4.4063	2.53892	5.79223	3.75341	3.65311	4.34512	2.50931	10.0495	13.5359	11.1668	16.6442	5.753	12.35	86.4839	84.3239	20.2508
DPF3	4.70332	7.19469	5.23844	54.51	3.16957	3.52751	2.78141	4.08417	6.42484	67.1056	116.178	6.8727	2.91654	3.39123	5.15564	4.36309
DPP10	598.596	2162.06	630.887	1348.17	4454.18	7104.93	3976.06	2126.38	964.464	20.4055	28.6245	633.779	1681.25	9745.54	120.732	1016.09
DPY19L1	2.25337	89.5173	6.93981	43.538	94.3871	125.154	13.6133	5.02479	3.71101	1.84507	2.02429	56.2247	19.5236	1.33586	1.00931	4.86305
DPYD	167.905	97.5239	20.0134	43.901	92.4213	147.452	249.633	123.509	19.1873	9.35235	9.6288	11.02	5.94296	7.6439	16.852	19.0397
DPYSL3	1.5696	3.30373	2.44366	3.05209	1.88671	3.96988	4.1894	22.4287	3.49386	67.704	31.7344	1.82497	1.55172	1.46797	1.99962	2.05966
DSP	1	1	1	1	1	1	1	1	1	1	1	1	1	1	17.1386	1
DUSP10	1.14127	1.05089	1.19971	1.08571	1.08682	1.14294	1.036	1.0558	1.27465	3.88743	3.69747	1.41287	4.76222	14.2823	1.84237	6.17801
DUSP4	1.19854	1	1	1	1	1	1	1	1.00034	1	1	34.4271	5.14448	1	1	1
DYSF	2.63969	36.0045	8.03147	6.80269	27.7297	47.8722	15.6783	104.298	4.06079	4.08555	2.23031	1.42007	1.78173	1.91057	1.78134	2.47943
EDNRA	1.75701	1.56363	2.41911	1.95853	1.68933	1.99729	1.64949	1.67891	2.68818	41.1086	2.49602	1.76849	1.54146	1.76324	2.71899	3.32857
EGFEM1P	6.99827	11.533	9.54028	6.69455	7.66291	374.997	6.69491	230.228	20.3207	7.44337	8.10673	18.5584	597.256	5.40829	9.86008	10.9478
EGFR	7.78245	10.2556	6.79996	4.75169	6.1992	8.74217	8.82077	7.81583	286.017	145.343	284.011	618.739	291.25	11.6495	8.21117	7.5405
EGR1	118.638	9.95389	54.555	202.19	29.6911	6.04848	6.92487	4.74567	1.00046	1.00046	1.00199	1.00046	1.35418	1.00176	1.42829	1.52094
EGR3	24.9644	1	1.00646	2.23577	1.00023	1.00023	1.3841	1.00046	1.00046	1	1.00023	1	1	1	1.00079	1.00046
ELFN1	1.26828	1.14752	1.43284	1.29748	1.28316	1.20737	1.17141	1.24808	5.72183	3.42297	18.5151	1.42602	1.24022	1.25637	38.5465	11.3404
EMID1	1.64665	1.46327	1.41107	1.58044	1.46061	2.50609	1.41306	1.53445	2.32833	4.3017	23.9143	1.5651	1.38016	1.65449	1.79449	2.04736
ENC1	1175.59	304.308	280.005	57.3445	401.292	150.495	463.469	156.997	22.396	4.65664	99.8252	2.98545	4.61812	2.14771	6.16831	4.1071
EPHA3	18.5349	78.3105	12.3174	32.7573	162.128	4.67461	3.49764	2.25784	12.8218	3.00924	10.5337	147.875	26.9939	5.34082	4.3629	4.68459
EPHA4	274.883	286.282	318.358	346.642	254.216	119.687	151.925	226.967	21.6934	125.707	140.144	19.6528	150.401	8.00228	3.51205	8.56243
EPHA6	690.483	793.185	64.604	8.46678	24.3478	13.1642	4.33018	6.48708	563.11	327.036	234.949	132.723	499.44	1943.51	1543.41	542.094
EPHB6	42.2244	39.5456	83.0409	99.2624	122.495	22.4885	65.6316	33.8316	5.70918	1	1	16.1198	33.0323	72.8761	70.7801	87.7119
EPS8	2.94405	2.27411	3.95794	2.84559	2.81265	3.06431	2.8979	3.01644	24.2661	8.74959	9.25669	2.77173	9.99738	2.76466	4.77778	5.68288
ERBB4	9.68454	10.6297	21.0972	14.7063	9.07224	79.0305	9.76399	12.5668	6330.08	6831.22	7858.69	2849.49	4454.18	10559.7	82.5151	861.318
ETS2	18.9749	14.3257	40.5881	24.4849	25.5943	5.84296	30.1608	3.44834	1.30482	1.17236	1.55276	1.26597	1.20403	5.43543	1.37282	1.44424
ETV6	25.3254	42.3513	22.1321	10.9472	23.8829	26.2669	132.699	3.58919	11.5392	7.72582	2.89966	23.0999	11.2151	100.148	292.324	59.1938
EXPH5	9.08079	1.15621	1.66473	1.25118	1.15289	1.22425	3.62301	8.60437	1.76144	1.05393	26.6631	1.01374	1.1562	1.17771	1.68789	1.1165
EXTL2	1.62427	18.0243	26.3803	15.298	4.77501	1.86491	1.67631	4.52289	2.75405	5.05902	1.03116	8.31588	2.89943	23.1034	1.9849	4.00561
EYA4	6.31111	3.04205	11.1614	5.36572	4.12997	4.88529	3.74188	4.34239	9.66757	6.96594	7.77783	195.924	430.276	4.90614	92.6685	14.5991
FAM110B	3.80032	6.03193	12.1705	1.90267	4.11691	8.17365	4.23339	22.8519	64.6815	14.1955	23.8066	252.243	231.16	80.2655	60.7107	117.907
FAM126A	1.57514	1.7658	1.84839	2.27558	1.7484	1.64108	2.71557	9.90039	2.5672	42.206	2.29774	1.91578	2.08749	1.41477	1.63284	2.22929
FAM19A1	1374.01	1426.55	666.165	173.001	351.085	108.575	540.33	321.91	124.974	108.19	94.1284	96.4274	57.2322	75.2494	115.985	130.034
FAM19A4	2.16046	2.92651	3.3517	2.46253	2.55902	2.22074	2.37322	2.47317	4.78052	2.56475	3.23833	2.22409	3.08982	58.3946	3.57043	3.72091
FAM84A	103.269	12.4374	17.4155	2.98176	1.07991	2.41729	4.17141	2.04365	1.65583	3.42882	1	1	1.98761	1.41019	37.417	14.522
FAT1	1.41138	1.30504	1.13101	1.22981	1.6872	1.44771	1.02787	1.19995	13.0037	3.63791	10.7974	295.773	196.159	1.56392	29.9891	3.19649
FAT4	2.25203	1.11506	1.17793	1	1.00831	1.24829	1.18944	1	41.0592	5.39411	72.484	3.4683	1	1	10.4625	2.20858
FBLN7	41.0893	3.25853	10.8172	3.17277	1.01436	1.35132	3.40161	1.31454	1.86963	2.96972	5.77159	1.91841	6.70294	56.6942	1.4968	10.9577
FBXL7	6.08079	4.16141	9.68296	4.00793	3.80034	5.02242	4.62358	3.88142	8.13457	5.59912	4.95366	840.194	847.62	4.22432	6.96958	7.66001
FBXO32	91.0179	5.74497	40.5412	60.574	27.455	3.44705	8.86161	34.7883	2.74352	24.6376	7.53539	1.06186	2.291	17.9691	2.41368	2.33248
FGD5	1.95614	1.60318	2.49444	2.11552	1.50419	1.75084	1.81479	1.77188	4.27057	27.3086	3.45332	2.12376	1.71395	1.73852	3.09642	2.5534
FGF13	33.0459	21.4275	56.0333	17.2233	14.8869	20.4894	18.8819	23.9443	84.3088	12.3835	11.0717	1864.51	2199.25	99.0754	32.9985	61.6246
FKBP5	8.82847	1.91135	17.6742	3.16436	2.70016	3.45588	7.12577	22.0235	2.57231	3.61582	3.93114	3.99069	2.19707	2.27438	2.75039	3.11217
FLT3	2.32901	2.03027	2.26408	2.23258	2.2162	2.54776	2.4339	1.80349	4.67806	2.48375	3.29444	2.861	3.79884	39.1378	14.5554	20.2805
FOXP2	4.96119	25.8372	43.3733	253.715	200.24	432.296	27.6554	7.64916	9.94533	5.48987	7.38329	7.16044	6.05147	4.77356	11.1513	9.36061
FRAS1	36.1145	199.45	55.177	27.3796	97.5199	233.591	69.3559	952.545	117.098	349.982	4.97705	391.797	5.92768	193.688	167.018	17.8303
FREM1	1.48081	2.08804	1.827	1.54067	3.69924	2.52402	2.17508	11.3885	5.53742	7.92271	3.13748	271.751	3.23034	1.50968	2.24112	4.40091
FRMD4B	6.71379	5.12867	10.4715	5.93283	5.96187	7.07089	5.62728	5.85441	13.1427	7.0056	9.13358	10.8992	86.4615	52.9432	13.6758	49.3521
FRMD6	13.5806	46.3028	7.5983	23.9023	4.66766	1.42904	76.4902	2.2919	1.47163	1.86923	1.85932	1.09743	1.30705	1.30097	2.61884	4.94905
FSTL4	636.8	197.829	204.453	610.224	952.821	84.8452	651.854	22.1144	8.42663	4.92049	10.1962	3.49166	4.1038	40.8714	7.93239	8.68703
FSTL5	6.65488	15.9499	10.3326	380.811	101.31	56.8333	110.3	5.92032	652.005	33.4589	20.2935	761.27	1191.13	8.87506	1339.63	325.986
GAB1	56.5976	248.167	122.425	141.577	22.5357	6.68285	55.2626	173.603	5.74135	7.87957	3.33716	3.20304	2.76105	4.48134	24.2095	12.6242
GABRD	6.14878	10.0371	42.8552	16.6727	3.01484	1.03561	3.41447	3.5663	1	1	1	28.3477	17.5118	20.1051	1	1
GABRG1	1.61116	1.47745	1.95199	65.7173	1.69167	1.59236	2.21611	1.55052	3.04568	1.95302	1.86555	1.51418	1.38288	1.47602	2.25151	3.03161
GAD1	1	1	1	1.12227	1.07106	1.04721	1.06908	1.086	221.915	578.598	323.722	534.286	335.73	738.182	316.178	521.472
GAD2	1.7105	1.28934	1.39432	1.42022	1.35729	1.57241	1.45539	1.61312	301.386	174.707	61.58	1271.02	1178.1	629.159	8.64866	260.533
GALNT14	3.40797	2.80568	3.39764	10.277	40.0026	9.51946	80.5555	466.993	3.3042	4.57859	10.3443	18.0662	4.05057	4.24036	14.1005	47.1124
GALNTL6	458.636	537.574	41.2974	69.3987	80.3501	101.365	259.739	313.352	1796.14	3332.04	1753.06	111.07	22.971	57.2534	27.7697	65.7719
GAP43	77.0741	409.655	166.263	167.151	209.221	142.958	218.951	89.9788	6.62889	3.91463	3.74598	7.36782	36.667	3.98111	85.0632	53.9979
GAS2L3	1.08927	1.06991	1.17048	1.07553	1.11784	1.0767	1.23772	31.0456	1.20464	1.52985	1.18704	1.20987	1.14532	1.27541	1.20592	1.19245
GDA	55.6232	57.7474	29.9825	38.38	45.6973	122.123	106.062	2.46637	23.2406	2.0576	28.96	24.2522	3.91564	3.44589	19.2294	8.77489
GFRA1	2.14046	3.24138	4.95907	1.63499	1.94534	3.23069	1.51622	188.432	2.19657	2.49826	2.63241	2.31876	3.9009	1.77529	2.09373	2.79547
GHR	5.54329	10.4633	3.93476	6.46392	57.9848	130.596	2.958	2.97456	4.79211	4.34898	8.74864	3.60133	7.09251	49.676	5.32318	15.7617
GLIS3	33.9804	216.817	84.4728	11.2612	9.69548	9.27687	7.37	10.8438	29.5243	28.0334	29.5637	28.571	14.8312	20.1606	30.9139	44.2854
GLRA2	1.88141	1.82949	3.00282	3.50402	2.14651	4.15201	6.02706	11.6322	45.4012	79.4321	77.7923	3.01937	2.55313	15.4262	2.082	9.04165
GLRA3	30.7421	43.4314	4.71299	3.03637	5.49974	4.39662	4.87449	3.08546	3.13748	3.66179	3.15943	3.20749	2.00708	1.54912	5.0327	4.80522
GNB4	1.35515	3.07607	1.1261	2.75527	2.07256	3.19106	3.94733	72.303	2.2053	5.06756	1.33602	6.39472	2.50629	1.26475	2.6242	2.85234
GNG2	41.749	5.55955	6.01676	2.96317	4.44334	13.5128	27.5566	137.747	21.122	19.4486	22.9213	6.53327	4.05091	2.57633	20.4671	13.4372
GNG4	3.45215	2.19568	2.19986	3.03565	2.7437	2.69811	3.2986	21.2899	9.98377	3.39284	3.32585	171.769	129.717	2.82857	4.52726	20.7558
GOLIM4	1.30372	26.4056	2.84237	23.2965	1.07678	1.24601	1.07993	1.58333	1.24424	1.07797	1.06979	134.408	171.029	48.026	1.0871	1.10173
GPC6	235.063	269.83	49.2582	56.4979	242.665	12.0276	83.7182	42.3263	13.9219	8.90097	12.1676	11.7899	715.846	45.4122	859.616	512.943
GPR149	1.95432	1.53845	2.11246	2.11009	2.02305	2.29109	1.94543	1.75334	3.10167	18.076	70.343	2.02981	2.28834	2.92347	3.1043	3.44022
GPR63	2.34584	8.95357	5.8136	10.1849	8.48843	2.24454	9.07626	77.8246	1	1	1	10.5186	6.87189	1	1	1
GPRIN3	1.02738	1.02061	1.09625	1.02879	1.08323	2.03146	1.31045	1.04632	8.68928	42.4402	8.4826	1.07623	1.05485	1.02116	4.91564	2.41893
GRB14	2.85788	29.0316	3.81061	2.05713	1.95302	1.81803	1.45224	2.39977	3.4354	2.38067	2.40773	1.92066	1.56009	1.6716	2.12003	1.96197
GRID2	458.601	972.419	58.7886	26.0449	527.532	422.965	687.755	29.4529	517.303	907.232	308.254	200.324	62.1363	42.2271	3920.36	1214.96
GRIK1	3.70702	4.18049	6.55144	3.33055	3.12085	3.17112	2.84892	2.48372	568.672	124.359	177.536	1237.42	667.335	22.5289	4302.67	1833.71
GRIK3	5.0865	1.51019	1.28018	1.90486	98.8381	517.75	335.292	1.47686	2.06855	1.27931	5.22324	1.84808	1.70946	535.432	475.69	685.303
GRIK4	219.315	6.16233	4.08383	4.60217	49.9571	289.887	425.723	6.34925	50.3188	5.61872	10.3945	105.453	265.425	4.26345	4.46746	6.65318
GRIN3A	1.43709	1.41289	1.40113	1.46348	2.90419	2.29467	1.29532	1.5037	102.169	116.928	6.26943	438.513	524.492	19.074	73.6756	162.694
GRIP2	1.20907	1.35831	1.04386	1.26772	1.05171	1.48148	1.17456	1.32849	49.9894	22.3378	79.6661	84.2293	102.859	96.7312	19.9251	42.0955
GRM1	221.887	41.6402	20.8229	202.777	164.989	17.1704	284.692	252.512	31.522	23.5222	6.02654	6.87412	4.51072	5.09877	16.1672	101.036
GRM2	3.66198	17.6986	1.59324	2.04269	4.78513	1.07256	4.29173	3.07202	1.08526	1.04733	1.07729	1.06329	1.02474	1.02128	1.12462	1.08408
GRM3	3.67992	439.103	148.034	169.279	88.8036	276.229	98.3006	2.79587	29.826	12.1657	15.1377	35.8583	86.6594	29.1546	9.564	24.2019
GRM4	1.64281	29.4147	4.03468	9.12197	3.0874	87.4209	2.06308	1.39937	9.80766	21.7206	3.13012	22.3832	52.3853	2.21521	1.46135	6.53512
GRM8	6.65614	227.72	11.6754	51.6105	166.747	160.9	25.2578	4.20005	44.8645	5.45629	7.27517	30.1623	8.28706	164.587	22.139	19.7263
GSG1L	81.0854	4.77182	5.72463	44.4633	5.9945	12.438	11.0407	426.378	10.9301	8.77629	6.61144	5.1841	4.68313	4.09998	8.28735	9.69535
GULP1	62.4504	143.663	28.5619	2.26695	4.93588	2.57455	76.2407	1.89518	2.38184	65.4315	39.778	1.99452	58.4069	1.54195	357.526	6.33964
HCRTR2	1.90606	1.77559	2.96299	1.55942	2.71137	8.11066	1.68883	2.75457	2.61708	2.88154	2.21961	1.25903	61.6132	1.47537	1.98204	1.71807
HIPK2	5.13593	6.50521	7.97252	5.26281	6.99196	11.2701	10.8041	35.8143	85.1591	141.084	91.3966	7.38822	17.1804	7.68611	17.0765	9.55409
HOMER2	3.08379	11.024	8.12535	6.22265	4.72403	15.2274	5.73506	29.4044	6.76504	10.4836	4.26052	103.359	105.791	3.63643	3.01834	4.82993
HOPX	19.3642	13.1302	16.4329	12.1983	1.25342	1.14882	4.08386	1.43129	1.00068	1.10352	1.04472	1.65743	1	1.1831	1.44969	1.00023
HPCAL1	216.782	2.46524	4.73753	2.44916	3.76798	7.0591	2.63451	4.22376	12.8248	6.21635	20.9512	141.843	120.107	2.57096	4.92906	3.60707
HPGD	1	1	1	1	1	1	1	1	1	1	1	1	1	1	43.0534	1
HRH3	1	1	1	1	1	1	1	1	1	1.00011	62.6062	9.39276	3.79329	4.66651	1	1
HS3ST2	1.76502	2.21032	2.55144	19.4828	193.192	80.5205	147.934	64.9664	2.31932	1.97431	2.46126	2.24661	1.76646	7.00213	2.40752	3.83381
HS3ST4	151.418	6.27945	19.3192	161.036	930.621	3223.49	128.995	2059.33	9.46167	6.87422	8.44509	15.8943	79.3061	4.88682	9.14848	15.7106
HS6ST3	2359.27	2211.31	1217.87	163.672	168.391	173.604	1096.55	462.501	753.872	1990.68	757.106	41.8817	13.0754	1687.05	27.2381	241.092
HSD3BP4	4.11917	3.55913	3.62445	2.88441	1.92735	1.09779	4.44893	31.1231	1.30311	1.9973	1.26463	1.19338	1.08148	1.1064	1.42866	1.29648
HTR1E	24.9676	19.8136	3.72764	17.4238	26.6357	48.8428	96.807	47.4598	19.836	45.8805	282.522	97.44	46.4401	1.7253	2.80607	3.06024
HTR2A	50.6096	155.258	122.177	126.119	72.2094	6.62966	19.462	7.91074	10.3056	5.60183	4.53441	7.1691	5.95617	4.73903	8.11801	11.3926
HUNK	6.90141	11.6255	9.59995	12.4563	9.06574	33.8427	14.0028	5.51842	10.85	9.33049	5.08639	90.7323	72.8461	217.728	44.6878	49.3054
IFITM10	1.04417	3.70323	1.09616	4.96211	24.8044	3.12587	1.69998	1.78772	1.28237	4.62191	16.9554	1.14954	2.80438	3.91858	1.18477	1.1478
IGF1	2.74577	1.68565	4.18292	2.48899	2.22326	2.2722	2.24147	2.26707	69.5513	140.483	12.398	42.6504	49.3575	33.5778	34.2008	37.7416
IGFBP5	3.85684	1	1	1	1	1.00777	3.09637	1	1	53.0599	205.394	1.14965	1.01139	1	1	1
IGSF11	46.4715	88.6667	38.1861	26.446	15.0277	19.3541	83.9034	11.6957	68.5843	33.6737	75.2133	292.551	632.935	72.4899	8.88966	18.2214
IGSF21	139.013	145.801	148.753	124.434	68.3169	482.534	302.578	403.882	5.34807	3.12444	262.665	2.6309	2.55073	20.9986	3.07679	4.81464
IL1RAPL2	11.7908	13.4016	25.0556	699.173	927.713	11.6901	135.969	13.9814	390.852	15.0185	64.3282	48.2261	11.7622	10.6388	25.2586	29.3851
ILDR2	8.97573	17.1316	16.103	4.50995	4.51052	39.0653	5.32951	3.04144	1.17249	1.30973	1.09745	1.07675	1.32446	1.0289	33.8001	1.58492
INSIG1	1.2192	1.13854	1.65751	1.40552	1.50316	1.16272	1.20366	1.31237	1.97429	36.667	1.9472	1.85922	2.21321	1.95476	1.66869	1.74324
IRS1	2.10284	2.89825	4.21748	4.06839	2.76612	2.32307	2.17518	1.43129	6.4054	34.3788	130.17	2.83745	4.48983	5.37715	4.12688	5.03341
ITGA11	1.00313	1.06779	1.00255	1.74409	2.37447	1.06747	1.03649	124.827	1.01005	1.00542	1.00954	1.00365	1.00168	1.00176	1.04427	1.00885
ITGA7	1.52881	1.02238	1.07658	1.05366	1.05662	1.03217	1.60305	29.572	1.18485	1.91533	1.13441	1.35933	1.59202	1.06959	1.08648	1.09768
ITGA8	4.06581	3.66235	3.69922	3.64581	3.55321	14.9228	4.30164	3.30562	6.8836	29.055	94.9898	4.90297	169.144	3.61682	5.00082	5.6809
ITGB8	27.2056	2.36431	2.26874	2.08379	1.13777	1.48316	43.153	354.425	5.50143	7.44514	1.61116	2.31302	1.12886	1.08618	5.60557	1.78493
ITPK1	26.99	59.5651	99.0885	184.093	145.534	66.587	117.071	44.5014	12.758	12.9113	9.7278	19.0161	18.5938	10.1841	18.2909	12.1158
ITPKA	61.8068	5.68095	7.18101	1.90125	1.07972	2.59535	10.2585	3.59401	1.01403	1.00891	1.01386	1.01275	1.00965	1.00168	1.02116	1.01353
ITPR2	18.4925	4.45978	47.2129	5.99134	5.44929	28.1096	5.05255	4.93075	9.17528	9.56952	18.6995	5.66915	4.11298	10.9271	136.489	9.21264
JAM2	3.67346	1.55131	4.88404	3.14218	1.92357	1.94637	2.17206	3.02096	4.35778	3.01151	2.6307	86.7837	27.9443	1.63236	1.57761	3.76159
JUN	10.8444	1	1	1	1	1	1.09884	1	1	1	1	1	1	1	1	1
KAL1	15.3659	10.376	18.2121	11.9899	11.2091	15.0494	12.9316	10.5607	19.695	14.0925	13.8634	101.544	14.235	21.5064	225.845	28.8656
KCNA1	24.0663	1.00776	15.3179	14.9207	6.39821	13.6332	31.9661	83.1578	1.0475	1.25004	1.02462	1.03167	1.01616	5.07129	1.13971	1.28995
KCNA2	32.352	63.582	259.042	75.5232	70.2995	9.69842	16.382	7.51521	30.0384	69.6209	77.3281	47.5627	69.0008	202.83	55.8938	50.2238
KCNAB3	1	1	1	1	1	1	1	1	1.23077	6.82948	5.96304	11.0639	4.12193	44.8746	2.41994	1.20435
KCNB2	92.735	770.284	138.413	222.181	537.631	339.352	310.797	7.29213	265.597	100.32	24.9855	45.4057	213.29	5.93181	12.8839	176.923
KCNH5	8.08979	265.945	108.848	227.121	49.4172	216.756	4.46783	6.52773	6.19119	5.83641	9.37419	98.3636	200.543	4.37161	122.123	17.5739
KCNIP1	2.09256	2.08943	2.75037	1.72202	2.22075	4.90598	4.54001	2.38411	191.89	227.232	38.4723	392.162	581.399	8.85729	402.275	320.306
KCNIP3	60.1071	121.763	29.5582	93.9158	105.961	129.165	84.7374	71.467	4.9203	1.86279	2.27866	4.69754	3.432	2.21858	2.60248	2.48681
KCNJ2	2.32835	1.41419	2.75418	2.33615	1.53696	1.46246	1.37182	1.35235	3.72324	1.36221	30.3769	2.15942	3.67379	1.34649	1.92678	1.71331
KCNK10	6.34896	36.5622	22.1946	20.1133	44.2315	11.8992	21.0122	27.8973	5.99527	4.24938	4.12482	5.21438	4.57749	7.38716	4.68642	7.39786
KCNMB4	19.9339	45.9416	13.0977	17.326	67.721	153.511	94.0889	27.0242	2.78659	2.00907	3.61356	5.10747	33.1814	4.15431	2.88154	11.274
KCNN3	55.351	26.6082	4.31126	2.84569	4.42363	4.52723	21.2246	9.19376	6.27897	2.86486	30.0107	7.88281	10.1351	2.34008	3.35247	3.55024
KCNS1	5.17353	1.54269	14.197	2.8122	1.03134	1.00835	1.35898	1.21383	1.02757	1.01158	1.0204	1.0204	1.00762	1.00965	1.0275	1.02511
KCNT2	40.3726	144.844	29.6996	12.5221	156.741	79.1212	239.112	220.982	170.762	904.612	388.585	79.2428	48.8657	7.56356	14.5687	17.0355
KCNV1	25.2228	9.55777	2.3448	3.25555	8.98322	1.02171	4.71797	3.43869	1.04528	1.01759	1.02557	1.01937	1.00857	1.01367	1.03515	1.02602
KCTD12	1.73096	1.22125	1.74419	1.37152	1.38109	1.59839	1.31308	1.13634	2.22604	48.5059	1.79817	1.62496	8.25976	1.29068	1.73221	2.03626
KIAA0319	12.6791	227.742	142.78	146.838	242.892	76.5425	22.0616	26.5703	38.3598	45.3267	99.5772	29.465	24.5531	21.136	13.1087	26.9525
KIAA1211	1.72681	4.58339	1.75392	1.63881	1.76388	6.24393	1.44851	1.56126	88.371	88.1691	41.2728	80.8887	221.447	15.4564	127.896	52.8204
KIAA1217	829.435	50.1415	357.884	100.171	68.9196	2778.58	216.964	179.526	236.457	360.776	212.675	64.6235	179.783	2260.67	2278.51	2436.32
KIAA1462	15.4881	48.4903	30.7863	98.2999	37.5749	21.8697	16.6788	3.5593	9.863	26.0849	60.266	5.26831	2.37033	2.27872	5.39045	3.28492
KIF26B	23.1675	11.8106	13.6727	10.2216	10.1524	12.1458	16.7815	9.74371	51.3223	134.233	104.699	14.3367	52.1236	270.488	563.448	339.305
KIRREL	1.03167	1.05038	1.04214	1.0403	1.05588	1.049	1.18958	1.33777	3.1577	1.05325	7.8426	25.701	143.943	1.16276	1.19068	1.06818
KIRREL3	990.586	1339.63	367.651	368.824	517.178	16.9879	904.541	8.44354	281.583	12.4664	247.326	648.294	2825.02	932.719	2287.07	461.531
KIT	1.00843	1.04205	1.00023	1.01595	1.00046	1.38094	1.06533	1.15848	17.8368	206.278	39.6727	1512.17	654.037	1.00904	1.19178	1.00046
KLF5	1.0068	1.00514	1.01453	1.00846	1.00846	1.00255	1.00085	1.00203	1.01856	1.00948	1.01463	1.01096	1.00407	1.01759	1.03714	2.67973
KLHL5	1.12465	1.13255	1.4457	1.25238	9.96606	17.2153	1.19721	1.086	1.69783	2.66736	6.26806	1.61724	14.5034	56.1946	6.82237	55.0393
KLRD1	6.62966	12.1762	10.2259	6.03823	12.3238	8.98821	11.7723	5.96444	11.5117	6.28314	7.58665	221.989	320.718	94.339	165.895	52.5412
KMO	2.24313	1.99895	2.75912	2.07465	2.51299	2.06745	2.80078	1.89473	6.55215	21.0815	71.4718	2.02304	1.63033	1.81728	2.52039	1.80712
L3MBTL4	4.19762	134.726	6.06506	9.34346	11.7807	2.92054	30.2993	3.59133	283.536	210.829	340.955	2.88962	2.56348	4.28885	8.75831	14.9545
LAMA2	12.3685	268.882	21.2349	18.2896	7.28673	8.65828	20.6852	17.4771	21.0835	46.5217	24.7029	6.99564	5.78458	6.50607	10.6711	11.8948
LAMA4	1.20714	10.8653	10.1464	4.69431	3.11218	1.32306	1.96758	30.6259	1.02269	1.00039	1	1	1	1.47743	1.00034	1
LAMP5	92.842	1	1.00011	1	1	1	1	1	1	1	1	225.225	353.248	1	1.00023	1
LBH	1.68298	1.44443	1.20146	1.26365	1.58208	1.48951	1.44419	1.34585	3.19779	6.18626	2.04027	3.35221	1.78731	30.8596	2.32398	2.77493
LCA5	64.4526	50.8056	11.7618	48.455	43.3517	17.1022	108.233	31.3039	4.06135	4.53099	2.46118	1.48048	2.50535	1.97515	2.41113	2.12792
LDB2	1212.4	1343.02	748.559	972.392	835.323	1043.45	967.341	461.635	21.1113	8.30634	17.821	65.5014	41.3079	211.869	9.71602	21.4506
LDLRAD3	8.92792	4.97306	6.84223	6.40737	49.026	6.14094	9.35566	5.2303	5.41468	4.13381	3.35223	3.17032	2.58109	3.64538	4.77537	6.89254
LGI2	1.05944	1.03956	1.24947	1.08136	1.07549	1.05648	1.04047	1.0425	4.01237	75.7216	49.7257	1.10873	1.05591	35.362	1.22161	1.20894
LHFP	4.02084	236.136	86.4838	139.617	182.972	24.1944	10.9176	3.11023	4.75332	85.4659	164.816	4.39413	2.77988	3.62049	3.26717	6.47542
LHFPL3	5.25421	3.2173	5.6485	4.21706	4.91541	5.20359	4.46119	6.42274	13.5192	18.9634	9.28801	6.43301	4.68735	5.79209	111.043	257.671
LHX6	1.01747	1.0092	1.06176	1.02998	1.02791	1.02083	1.01386	1.02988	1.07791	1.03268	1.06626	1.05822	76.3006	140.986	64.5863	95.2292
LINC00290	1.93476	1.33288	1.46389	1.54326	1.59188	1.55387	1.42675	1.47258	15.5912	39.5955	7.02798	2.03605	15.9635	1.60218	57.6465	46.0099
LINC00470	11.4326	71.3468	9.62324	1.60707	1.60236	1.30335	9.83871	1.37641	2.08449	1.58174	1.46301	1.2667	1.38666	1.24532	1.76768	1.83495
LINGO1	160.538	185.631	160.148	200.455	160.484	73.6151	192.636	281.149	4.59034	4.04512	38.5254	3.82374	5.37235	5.08144	5.50116	5.31562
LMO4	224.813	359.727	602.765	606.05	230.664	134.242	310.645	424.878	11.0671	3.2544	6.46138	19.523	169.348	6.30808	6.95932	7.69438
LMO7	86.1184	17.0012	45.4466	46.5955	27.5541	153.48	48.9782	26.5317	6.57939	2.12109	1.46523	33.3034	6.60325	11.8204	2.65009	4.91392
LPP	19.2049	321.455	61.1167	12.184	10.7695	13.8637	9.37084	16.0199	57.7662	60.5622	153.247	44.8471	40.855	280.743	33.0795	36.1338
LRMP	1.39042	7.17758	1.39588	15.6439	15.2657	3.08091	1.54613	1.95677	1.26934	1.4875	1.85576	1.64451	1.83298	2.03176	1.81026	1.33718
LRP8	5.90182	6.38182	2.88815	8.3339	7.43876	119.575	7.83076	3.60566	10.8824	19.6336	16.5738	12.3637	82.4622	206.29	378.286	261.803
LRRC39	1.77766	2.23024	1.81782	1.99098	2.21288	2.42911	2.06917	3.78983	10.7483	62.3179	49.0351	19.8151	6.74884	16.4679	4.03033	4.32678
LRRC3B	5.06735	4.73032	6.93462	4.42213	5.45118	26.2478	6.97793	4.94346	12.9618	43.4407	109.228	19.7022	16.4592	4.48198	7.25369	8.40035
LRRK1	3.671	146.277	16.522	30.2675	256.04	2.67913	24.6575	2.36805	4.44377	2.20091	2.55484	2.22678	2.73771	8.85768	2.6895	5.61966
LRRK2	24.8578	79.1244	38.057	27.6659	19.4849	14.3054	30.7328	16.4561	4.41817	3.57553	3.27082	3.51043	6.54739	3.00335	7.92943	10.2165
LUZP2	19.0362	53.2374	12.0174	9.18829	14.1865	270.616	10.5916	10.0316	276.118	9.90033	14.3718	505.543	330.243	458.592	41.2648	25.714
LY86-AS1	208.015	111.969	22.0588	165.993	89.9423	109.536	147.866	7.64394	6.03277	3.55049	9.54014	4.08818	3.66289	2.7393	8.68179	7.97389
LYPD6	1.09884	1.04093	1.14194	1.11139	1.06956	1.07233	1.0367	1.04695	2.52848	12.139	3.86991	9.19806	40.7507	52.3649	1.18256	1.30218
LYPD6B	1.42532	1.18136	1.93333	3.95431	1.26152	1.47122	1.40372	1.60351	22.3267	33.3995	16.3384	17.6694	14.9951	48.2027	2.44412	2.70972
LZTS1	35.3986	8.23108	18.2586	1.07452	1.0215	5.84301	33.3757	6.35145	1.10876	1.01487	1.03313	3.48479	4.08332	1.03396	3.54512	1.02394
MAF	1	1	1.00046	1.00023	1.00023	1	1	1	1.00994	16.1579	25.844	46.8248	171.088	102.624	90.9543	44.0826
MAFB	1	1	1	1	1	1	1	1	1	1	11.3118	6.84522	12.3706	49.3903	9.81066	52.7186
MAMDC2	1.21486	1.46671	1	1	2.28235	2.28629	2.75215	48.3293	1	1.23467	1	2.35018	1.92184	1.55573	1	1
MAML2	5.63261	2.52683	5.33964	3.45134	3.09043	4.82754	3.84485	3.8042	8.81086	3.74767	4.92492	5.15397	3.92799	2.78664	131.818	5.6091
MAN1A1	80.4825	13.2651	3.47904	70.5429	85.6188	49.4876	11.9085	2.26707	7.04038	1.71995	2.70332	2.02344	1.75927	1.59037	437.718	44.8611
MAN2A1	7.33553	173.252	22.7816	95.878	201.289	127.616	204.979	41.9497	29.5075	2.69921	11.4272	14.3696	6.13353	31.3141	57.9977	29.531
MAOB	7.73885	37.8236	2.3956	1.6566	8.26382	38.5257	15.4306	4.73685	1.56629	1.42668	1.60718	3.10651	1.61198	1.08323	1	1.66787
MAP3K5	159.844	162.599	122.633	14.6418	16.5385	69.1355	70.1625	102.426	11.5919	4.94942	25.8036	372.493	145.517	26.7216	468.368	85.421
MAP6D1	1.34697	1.05553	3.41061	1.18289	1.11947	1.0684	1.07245	1.17063	1.2212	1.15213	1.19159	1.14765	1.09831	1.05028	1.25667	1.21618
MARCKSL1	1.21939	1.18434	1.48543	1.31368	1.26691	1.19705	1.13555	1.10785	6.64035	8.08663	33.024	3.34061	1.76462	1.1007	1.61718	1.5564
MCC	3.34152	3.25934	6.70265	4.57336	4.25723	124.425	4.04019	3.92633	44.8201	153.375	190.36	13.268	6.94964	97.2324	60.4107	16.555
MCHR2	6.40878	6.89894	9.13007	3.29641	3.50389	1.18074	6.88339	27.2041	1	1	1.00023	1	1.00011	1.0127	1.05438	1
MCTP1	155.793	92.5726	44.0167	42.0422	201.503	1015.12	1064.11	347.677	133.696	15.6785	20.284	400.212	680.731	116.067	39.9713	107.481
MCTP2	5.11842	2.90638	7.57314	4.69725	4.11219	5.13121	4.45286	216.622	7.84382	5.91742	10.0373	5.1327	4.72517	4.60835	7.16988	7.75266
MDGA1	11.1986	1.1988	1.09921	1	1.21306	2.48788	2.61426	2.31672	1.44877	1.0396	1	2.60141	40.5238	1.14257	1	1.04237
MEGF11	8.18979	5.90335	9.21267	7.84784	10.4736	43.1154	12.2252	8.05041	86.6042	21.7316	14.0579	11.7406	8.49246	9.05935	12.6462	16.3709
MEIS2	192.69	7.4994	55.4083	9.86173	6.43926	329.565	10.0273	10.1827	17.4388	8.68769	13.3086	12.0561	6.90361	6.458	16.4437	19.6806
MEIS3	65.066	3.54588	3.69913	15.4633	41.1551	72.7621	101.042	10.6942	10.7009	2.11122	1.49972	4.18613	2.94137	1.62793	1.06206	2.5552
MET	1.58239	32.6744	97.3464	10.7968	1.66997	1.11471	1.10732	1.26295	1.50907	1.40364	1.1978	1.00147	1.09528	1.145	1.0179	1.07083
METAP1D	2.20066	2.36522	3.15561	1.74657	2.79417	2.217	2.79402	2.9753	141.179	30.5353	74.496	79.4901	219.878	34.8981	61.6785	69.6729
MGAT4C	169.171	704.375	125.141	183.913	88.9745	59.0254	19.6629	139.528	172.427	664.39	10.2686	1465.27	2451.43	55.4741	385.965	559.245
MGAT5	52.2249	105.489	51.07	80.454	86.6225	75.1491	139.396	716.755	45.7336	29.1902	41.1586	117.196	120.48	152.666	24.0471	68.2318
MGAT5B	65.2906	126.482	72.0234	58.9242	55.4065	2.12806	63.7774	86.1872	1.82497	7.366	1.8534	38.6716	41.4879	13.4282	2.57964	35.2266
MGC45800	2.51557	2.57479	2.59585	2.49203	3.15157	3.9734	2.97821	4.74902	95.8552	108.43	17.0258	4.59975	107.695	33.0001	304.116	208.989
MIR137HG	155.902	176.107	66.0767	117.866	162.611	283.994	392.392	154.594	29.0841	1.76416	5.90106	31.4486	11.7278	1.25665	37.8662	36.6944
MIR31HG	2.04616	6.94113	19.2102	37.589	4.92199	12.3258	2.71411	5.46322	1.54249	1.59719	1.21108	1.52312	1.22065	1.22228	2.25231	1.5173
MKX	1.76643	1.71058	1.47668	1.00451	33.5265	1.22414	7.64672	4.17675	1.37497	1.00079	1.00446	1.88557	1.31467	2.82937	48.4743	2.13356
MLIP	320.453	197.023	171.94	202.858	91.3313	168.861	223.049	12.5753	2.69299	2.45712	2.56973	2.47486	2.57581	2.5335	3.91067	6.93694
MMD	3.72975	2.5761	1.60428	1.78386	8.3052	6.8168	34.1071	14.2103	1.01765	1.00186	1.00348	1.17829	1.01039	1.22965	1.01039	2.90979
MN1	2.51226	1	1.00091	1.00046	1.0009	1.00046	1.08215	1.00869	8.26098	1.00046	1.00079	7.04926	2.47647	1.01616	1.00203	1.00062
MOXD1	3.8883	1.8816	4.90045	1.98412	2.2325	2.19001	10.6445	46.0663	2.42986	2.75081	2.44312	2.35457	1.78913	2.26476	2.81825	3.69995
MPPED2	112.468	18.9418	31.3016	69.7499	12.9667	39.359	48.7407	3.06322	5.93544	4.36969	5.34435	3.95322	3.79739	11.3849	5.95431	13.2131
MREG	1.87956	2.59901	1.00193	1.4176	1.5088	1.76814	5.38001	38.461	1.1065	2.35206	1.00157	1.59155	2.66	1.51935	2.16795	3.19625
MSR1	6.65995	4.87808	11.1475	7.22307	7.25228	5.92801	6.64354	5.42855	11.488	9.28954	10.1363	7.53097	5.40012	6.22395	205.348	14.4118
MTSS1	2.77909	10.5925	3.41113	4.46439	23.8395	30.8503	19.1764	12.5958	157.543	114.788	126.927	300.906	298.073	147.448	58.4132	79.0131
MYO16	7.35706	14.056	13.9585	6.47741	8.57567	9.07373	29.0477	5.57545	12.1948	17.7196	18.2236	549.342	1121.18	489.178	11.2023	24.0921
MYO1B	14.5676	11.9011	10.341	5.01379	3.26715	3.71828	3.87409	24.5779	10.7477	7.11271	3.89724	4.81663	2.89395	147.263	5.08262	5.55539
MYO1D	83.5209	135.771	45.0683	33.9519	18.5983	81.5365	270.942	49.9896	31.2555	12.5673	9.40876	11.4206	6.88876	7.03045	14.5689	10.6751
MYO5B	5.5342	3.39474	7.59701	4.72129	3.98664	5.72123	4.27178	4.33777	9.83174	5.23097	5.24385	6.13835	4.7293	193.2	111.407	30.5948
MYOM2	67.9168	3.58643	11.6071	5.04501	4.38911	6.62052	82.2942	157.723	7.00853	5.69315	5.84269	6.9792	3.77464	5.46822	8.44502	8.13276
NCAM2	686.17	414.762	286.189	475.211	634.757	437.498	1486.38	747.391	1290.4	865.227	71.4173	146.632	352.155	199.155	4231.29	522.838
NCKAP5	7.20517	9.02104	8.04258	6.87631	9.45537	9.24878	7.10701	5.25086	45.1675	179.391	17.6708	10.8526	6.63746	5.84913	9.69028	15.9096
NDFIP2	255.406	54.9923	102.832	83.9066	75.5613	77.7692	62.1792	129.921	4.30368	5.01485	4.96583	6.56161	5.82679	10.7855	15.6652	10.9561
NDST3	315.364	221.526	35.1552	28.424	173.131	83.736	8.75439	41.3692	7.61762	118.953	12.3887	8.04599	6.61779	188.483	55.15	31.7707
NEAT1	1.04234	1.38437	2.08383	4.38641	2.50143	1.32355	1.25113	14.898	73.898	847.555	233.84	1.9137	8.20869	540.444	1.72445	3.83898
NECAB1	351.873	378.646	437.076	208.411	240.274	58.6824	561.024	258.377	25.7315	32.7535	7.10427	9.82656	165.519	8.21151	15.2677	14.8467
NECAB2	3.35781	1.00861	1	1	1	1	1.96587	2.3839	73.7751	37.2448	1.00395	105.723	35.4237	1.81003	1	1
NEFH	1	1.24366	1.99189	1	1.09718	1.15699	1	1	1	7.59352	9.88037	1.00831	5.36453	47.8524	1	1.34238
NEFM	31.1405	108.092	101.239	16.0661	52.886	12.2754	24.8091	5.87068	1	2.16416	1.21273	1	1	31.0872	17.9855	1.77615
NELL2	522.178	673.828	473.884	1019.06	1002.51	836.33	988.918	771.355	233.547	36.824	311.211	22.02	10.27	35.813	6.25235	40.5202
NETO2	20.282	8.75377	4.68941	2.76176	37.5277	47.3595	21.468	4.62265	110.572	12.2637	10.1963	5.9621	37.2334	100.622	322.583	195.779
NEUROD6	1.00186	1.75313	1.01759	12.6196	16.4496	1.01039	1.5798	1.01039	1.01154	1.00139	1.00891	1.00885	1.00079	1.00046	1.01055	1.00891
NFIB	163.627	200.211	74.1973	7.05882	79.2716	481.196	51.7536	8.27379	325.641	430.215	405.313	865.227	916.242	2.70135	5.8543	6.18267
NGEF	242.106	206.812	157.356	55.5449	247.426	322.648	153.549	174.373	9.20413	4.86987	11.3554	19.3061	15.734	3.18661	4.03816	7.748
NHS	4.83429	3.61098	6.63127	8.27405	6.05582	16.9001	3.76635	36.7245	189.269	122.03	137.756	106.872	226.182	339.003	123.642	145.171
NIPAL2	91.9018	105.79	113.201	71.5268	110.774	139.022	96.3645	8.80412	5.96699	12.5302	15.8746	11.6905	10.2148	2.79069	2.04438	4.89652
NKAIN2	574.39	1832.12	263.785	1549.2	2450.62	1825.4	2103.83	381.948	631.529	137.067	25.3762	288.732	395.529	522.543	97.3531	361.421
NKAIN3	4.88503	3.34681	6.64387	6.39395	5.48449	8.26799	5.61376	7.81144	20.2839	24.2507	346.576	55.1943	734.06	4.55279	8.70112	7.42457
NMU	1.00085	1.02062	1.00885	1.00079	1.00091	1.01133	1.00079	1.00306	1.0079	1.00348	1.00657	1.00627	1.00079	1.00365	1.27373	6.37176
NOS1	4.29821	3.84557	4.24606	3.47319	3.95606	7.72111	4.96367	2.89941	4.574	4.96391	3.95598	5.51388	431.191	9.69478	13.5323	30.6876
NPAS3	222.35	377.306	160.776	83.3202	157.384	154.541	167.614	94.5745	1711.87	3038.65	459.709	71.1977	87.084	445.151	368.499	764.795
NPPC	1	1	1	1	1	1	1	1	1	1	1	1	2.16882	8.99998	1	1
NPR3	1.17846	1.18178	1.46436	1.22513	1.01981	1.07859	1.12273	1.15113	2.09976	109.424	9.99452	1	1.32741	1.11722	1.32724	1.13052
NPTX1	311.5	42.8677	153.619	207.203	119.717	248.125	288.869	394.402	2.68619	1.15925	1.42691	1.70994	7.15955	7.0614	3.62096	2.31178
NPTX2	29.4633	1.02183	1.15675	4.48134	3.10667	1.20397	13.6005	1.09647	1.20296	1.10927	1.13861	1.1188	1.07419	1.04065	7.1307	1.16955
NPTXR	299.018	36.5206	31.3401	236.925	65.7531	2.16594	151.764	19.7493	397.395	131.787	110.748	358.028	108.516	9.75905	71.6884	103.579
NR2E1	1	1	1	1	1	1	1	1	2.92108	1	23.8736	1	1	1	1	1
NR2F2	1	1	1	1	1	1	1	1	105.977	161.862	89.1091	1	1	1	1	1
NR4A2	1	1	1	1	1	1	1	216.369	1	1	1	1	1	1	1	1
NRGN	241.327	125.275	395.744	214.36	89.7776	111.877	121.013	75.2541	1.00112	1.00023	1.00046	1.14017	1.25981	1.23142	2.54477	2.91412
NRIP3	1	1.29057	1.72574	1.01618	1.00789	7.03234	1.27839	1	81.1103	43.0521	4.54839	336.646	86.0786	29.894	55.1222	48.4016
NRN1	23.4716	26.4483	84.1917	29.682	41.8852	5.59474	9.2425	4.49039	1.00023	1	1	1	1.00051	1	1.00023	1
NRP1	12.8331	7.21023	7.02217	4.07395	3.75999	79.1044	21.2322	3.44176	7.14038	8.13682	6.29461	3.42173	3.72286	3.11964	4.42577	6.83631
NTNG1	3.6313	609.88	361.692	122.999	4.9852	2.69953	2.61076	96.0821	5.44162	3.58906	2.62282	210.764	910.148	2.42386	3.85145	4.42167
NTNG2	1.80621	3.08006	3.04399	4.89762	11.6543	1.92853	7.18684	578.33	2.18587	5.53772	2.05184	1.9306	1.18	1.29032	1.37651	1.06272
NXPH1	109.013	60.3085	150.489	99.627	82.1697	122.045	113.947	88.9405	172.507	99.0281	121.407	1478.92	2175.32	1833.71	1649.35	1500.07
NXPH2	1.05762	1.07393	1.0117	1.12129	1.00057	1.62108	1.06523	1.11516	1.45857	1.25017	5.65562	102.545	74.8843	2.07735	44.724	12.094
OLFM1	921.506	661.311	1698.06	995.352	715.686	162.797	328.359	388.51	116.372	658.379	468.329	123.695	53.5917	139.528	48.4592	22.3852
OLFM3	174.373	747.675	207.66	495.172	324.476	772.469	177.204	184.3	9.06508	832.11	521.462	2.93961	3.35902	2.68103	3.34667	5.52313
OLFML2B	1	1	1	1	1	1.00423	1	64.2609	1	1	1	1	1	1	1	1
OPRD1	4.39986	14.3976	2.56855	3.38194	3.39914	1.87595	8.93707	2.31672	1.29982	1.44807	1.43385	1.40351	1.78795	54.7695	1.21814	5.17072
P2RX7	35.1119	4.2224	4.41086	6.4533	17.5886	13.7374	62.752	64.6944	5.10454	2.83291	2.06698	10.2322	6.74097	3.33312	1.97035	3.89257
PAPPA	1.52296	1.76831	2.79176	1.55058	7.14108	17.3312	8.07809	1.21189	1.58147	7.10634	3.08444	2.70844	61.6887	79.4544	5.36405	45.4695
PARD3	8.91684	5.90003	9.64473	6.27638	6.12679	7.50147	5.81771	5.59814	83.063	14.1754	168.378	103.404	116.914	33.5359	314.83	37.7289
PARM1	3.63335	76.399	65.2593	134.832	46.249	1.08014	1.34942	1.06703	147.001	188.58	91.0713	2.91863	1	79.0994	1.02194	3.48374
PART1	1.68098	7.60348	1.63164	5.6062	14.5636	20.6621	24.0645	1.12275	1	1	1	1	1	1	1	1
PASK	2.44191	2.94704	1.29249	2.20098	4.57935	3.02521	4.02523	72.1724	1.03531	1.59958	1.01478	1.01259	1.65989	1.73248	1.0127	1.40422
PAWR	2.02352	1.58314	1.87701	1.6756	1.92704	1.7409	1.70124	1.91704	2.65402	2.48495	2.81033	3.19391	26.6375	3.1308	2.89245	14.7923
PCDH15	14.5788	9.3108	21.9707	12.2996	35.7234	94.3809	12.2393	10.8105	46.0491	37.5452	26.4961	130.041	254.198	25.1143	275.315	265.111
PCDH19	39.1849	23.0416	6.6491	4.54945	21.6983	3.31359	1.75618	1.11947	4.39446	1.55135	81.9686	3.30717	76.6547	58.9844	9.49132	76.3019
PCDH20	1	1.17977	1	9.09307	1	1	1.10302	1	1	1	1	1.0147	1	1	1	1
PCDH8	53.7247	1.42754	2.13251	1.28108	1.25499	1.17779	1.12637	1.25491	5.46178	22.3286	112.43	1.37841	1.172	1.24091	1.87926	1.95537
PCP4L1	1.4545	1.27726	1.42731	1.32989	1.98191	1.6756	1.46399	1.35149	13.184	26.6138	6.01154	51.6234	12.7964	7.10179	3.12217	6.64838
PCSK5	10.1341	6.02147	13.1212	7.20866	8.02153	93.4555	12.1756	14.6176	57.8743	54.1001	17.125	13.7141	29.4879	10.592	220.836	122.547
PDE1A	511.122	90.2369	40.9414	571.461	988.682	852.559	382.192	1889.47	10.8171	5.36835	6.57367	7.66899	4.90668	4.38202	443.123	199.11
PDE1C	15.4577	71.9122	12.5897	7.13251	348.515	22.4136	5.97805	4.15304	113.795	276.959	149.704	15.7886	50.542	3.67922	91.2693	172.958
PDE3A	4.60131	2.71135	16.046	5.62293	3.9077	4.31693	4.00594	4.69155	26.7369	99.0813	136.056	11.6147	5.01664	4.28156	7.68529	9.50812
PDE4B	64.3572	246.521	152.574	10.102	439.811	550.634	86.7036	4.28403	272.589	766.269	789.587	10.5056	4.3994	5.84117	1184.2	218.312
PDE7B	99.4999	55.5739	65.7829	13.964	3.24696	2.55746	3.50854	2.23846	30.9831	297.868	83.0442	5.34466	92.5337	3.30335	80.0241	6.91526
PDE9A	1.90697	1.76091	2.10942	2.28655	2.08664	3.5008	1.93906	2.92743	3.04147	2.98008	117.312	1.99393	1.83935	3.85918	2.30492	2.82644
PDGFC	3.51431	7.81556	8.48374	5.88188	51.9741	17.337	52.5751	1.992	4.65339	2.89453	3.22341	3.26795	2.76726	16.1856	4.05133	4.07741
PDGFD	16.7434	2.29864	3.29207	3.22558	3.06256	3.20319	2.79664	2.40477	3.87549	3.23657	3.33557	27.8125	543.398	2.91756	5.2769	5.93005
PDGFRB	1.5099	1.73659	1.87433	1.50466	8.07366	1.15007	1.39627	1.06061	1.21601	1.14343	1.20755	1.14007	1.07521	1.04672	1.81911	1.17671
PDLIM5	3.01036	1.8705	3.3099	1.91785	2.71735	3.01316	2.30631	63.5314	3.77644	2.8876	3.47404	2.59257	2.25373	2.33768	7.48019	4.61339
PDP1	156.668	65.2407	267.624	84.0028	69.7815	24.0001	64.4612	46.6273	3.97999	15.3867	9.59953	73.7695	45.9164	2.96516	7.07671	3.72768
PDZD2	1435	47.4015	83.7574	37.1356	32.33	341.91	1090.14	589.011	96.7377	27.3735	48.9782	311.973	836.937	32.6049	38.1333	33.2838
PDZRN4	4.85997	5.06661	15.6095	131.588	99.4917	474.403	271.186	536.453	6.82178	2.83647	3.79546	3.34868	4.07962	2.94825	67.9824	16.1869
PENK	1.14847	1.05048	1.3748	1.18139	1.13922	1.1201	1.07779	1.07675	1.43454	1.17972	1.31107	1.21324	1.11921	1.06954	53.3507	1.35361
PHLDB2	1.31033	15.4207	1.73751	4.04347	6.1449	2.71975	1.72309	1.1775	1.75936	1.40503	1.15238	1.13877	1.1517	1.84649	1.68426	1.77618
PHYHIP	225.819	51.3882	218.373	157.099	89.0196	19.6969	69.8387	39.478	6.75087	5.27082	4.0337	23.3596	33.1889	8.20977	14.322	9.82253
PIK3CD	2.06746	1.96913	2.53273	3.52917	5.0105	2.53307	2.97647	2.13368	3.5711	3.266	2.66292	2.87832	8.78348	3.83188	7.17113	14.8516
PIP5K1B	36.4461	22.4415	19.2772	8.63164	8.09764	7.02909	4.71745	4.08417	168.098	25.0099	58.3081	379.803	495.952	138.092	323.987	128.786
PKP2	1.95739	1.75929	2.02302	1.79478	1.57379	1.88761	1.48403	2.19213	9.55269	6.42672	76.7772	105.79	106.335	1.78294	2.93512	2.11537
PLCE1	7.95301	4.37647	8.52943	6.30311	7.08268	6.71859	6.23256	7.73788	17.4626	77.3471	179.241	7.28817	7.32366	40.5902	14.574	13.4601
PLCXD2	1	2.22439	1.02414	13.7522	1.40038	1	1	1	1	1	1	1	1	4.20316	1	1
PLCXD3	2.07967	31.7307	5.83462	98.0638	29.0635	2.29576	1.79985	2.32535	4.78438	64.4273	2.86638	82.968	2.33374	120.196	2.46845	4.08628
PLD5	3.7374	2.65342	3.61057	3.74722	2.79046	4.57668	6.28336	168.083	408.121	559.995	495.956	11.7594	21.6968	188.079	6.33708	9.13339
PLS3	2.14734	6.96296	2.78994	1.44179	2.04877	1.73469	2.38649	1.70418	65.7985	109.338	2.16695	1.38117	14.2864	6.9178	9.74242	4.19774
PLXDC2	92.1612	8.78101	34.9887	97.06	284.268	191.865	291.286	268.518	27.9061	10.8324	15.5972	13.5345	10.6174	12.0846	20.7245	18.4759
PLXND1	6.22062	25.9951	9.26215	22.0211	5.14654	1	8.02766	2.67117	1	1	1	1	1	1	1	1
PMEPA1	2.78828	14.4159	13.2444	1.18482	3.06149	5.67189	1.79541	10.0404	9.50275	1.06838	1.16234	175.107	117.375	1.13403	1.36545	1.19583
POSTN	1	1	1	1	1	1	1	151.554	1	1	1	1	1	1.85593	1	1
POU3F2	1.05656	1.24327	7.86441	2.10091	1.02941	1.01611	1.01055	1.01856	1.06041	4.26476	1.04577	1.04621	1.01436	1.0088	1.06164	1.05624
POU6F2	4.38978	840.159	484.218	694.75	407.469	332.291	660.096	227.856	14.3586	6.04354	6.46084	138.557	9.51365	7.94722	9.88489	14.0837
PPARGC1A	24.4577	13.5084	37.9129	25.7994	7.96653	13.167	17.4203	6.04485	10.433	72.0403	16.0626	7.71742	8.42983	221.408	77.897	67.243
PPP1R1C	3.10061	1.93583	3.39266	2.70068	3.40514	2.54486	3.07889	3.05409	8.27331	52.835	4.673	2.73546	1.83307	2.14612	4.56761	2.93358
PPP1R21	12.3369	95.6865	96.5419	24.7344	11.1485	33.7527	32.6528	53.585	6.6256	4.02755	6.14005	9.52481	16.0779	8.96389	12.7063	20.2764
PPP4R4	46.0073	38.0025	4.91866	4.00299	1.90941	1.69768	90.0072	3.05726	5.87974	6.57425	3.41951	4.30089	4.96824	12.5433	8.68501	12.2621
PRDM1	1	1	1	1	1	1	1.00234	1	1	1	1	1	1	8.52875	1	6.3135
PRDM8	2.04457	17.1319	43.9448	19.4471	16.0891	1.20692	1.27898	1.69429	1	1.10566	1	1	1	1	1.23441	1
PRELID2	44.2696	11.7259	32.5736	17.8037	10.0787	12.7327	77.6159	113.177	155.663	94.9219	22.2745	792.27	517.473	12.953	31.097	25.9347
PREX2	2.12357	1.40192	1.85229	1.58103	1.49133	1.28411	1.84952	1.48739	32.3809	20.1429	26.1262	6.78636	120.515	2.58586	2.0256	4.45499
PRKAG2	194.966	295.3	59.4508	132.469	349.039	665.229	669.522	280.736	41.7615	38.2624	16.1576	20.0022	27.7447	64.6813	64.1856	38.5361
PRKG2	5.30801	8.34782	2.36144	1.06937	1.01838	1.09593	1.1275	1.02603	3.62034	1.3607	1.05138	13.813	1.89353	1.87336	41.041	7.33332
PRKX	2.3088	1.49039	1.82723	1.6121	2.05797	1.73722	1.67067	1.81172	1.92135	2.84164	1.91736	1.89074	2.24363	5.95829	3.90177	11.3909
PRLR	1.31319	1.32872	1.4913	2.00402	1.46081	1.61944	1.34349	24.1204	1.73178	1.44314	1.9452	1.56425	1.24809	1.61513	2.19305	2.12392
PROX1	1.04555	1.0088	1.13065	1.05822	1.02926	1.04203	1.02445	1.03122	161.094	205.739	221.795	63.1868	5.0679	1.0215	1.09323	1.08795
PROX1-AS1	1.00079	1.00062	1.00531	1.00106	1.00795	1.00062	1.22797	1.07675	24.2456	25.0696	31.184	8.4291	1.83789	1.04364	1.2885	1.00112
PRR16	21.0413	122.812	55.838	22.8262	68.1902	156.228	22.8546	14.1042	178.013	224.124	4.54767	176.957	3.1482	13.4896	4.61678	6.05213
PRSS12	1.0185	33.161	1.02283	1.41024	1.05725	1.0668	1.00424	1.01363	1.02918	1.01465	1.01695	8.87228	3.68976	1.00249	1.02116	1.01695
PTCHD4	1.93974	13.5621	11.9441	54.2191	44.5278	6.13636	1.16039	1.56581	23.1626	7.60948	6.21281	669.394	750.877	287.421	276.773	179.19
PTGDS	1	1	1	1	1	1	1	1	1	3.87206	16.7091	1	1	1	1	1
PTGFRN	14.1983	11.6586	7.37005	45.0735	5.08132	1.42298	1.56339	1.85406	2.16638	1.55847	1.65019	1.46607	1.38573	6.0155	15.613	2.62643
PTK2B	477.997	458.138	403.947	200.512	116.678	214.45	389.445	138.043	7.17421	4.75086	4.16057	3.53541	3.53667	3.03439	111.529	11.1834
PTPN14	4.90452	5.69198	7.64515	38.2368	15.8793	3.3632	13.7754	2.01056	2.48818	2.13073	3.63239	2.75705	2.07039	2.4677	4.17692	2.41042
PTPRK	125.244	1234.2	326.461	497.75	388.607	8.4447	712.395	472.42	13.1664	6.93361	9.71809	8.57486	5.71438	7.55855	10.1873	15.4809
PTPRM	16.9374	33.0152	16.1409	15.2821	60.8969	44.8958	10.6987	29.1524	350.462	56.8125	146.42	803.879	488.204	884.589	780.296	608.644
PTPRQ	3.62097	7.965	3.87099	1.44518	1.48432	1.54917	2.11906	47.076	1.87597	1.45442	2.59214	1.87644	1.38417	1.39598	2.3524	1.9765
PTPRU	2.82177	1.26254	1.95189	3.41356	3.26996	45.1439	10.5816	177.849	2.00796	1.29748	1.02279	1.61041	1.2504	1.26909	2.72315	6.09108
PTPRZ1	5.1777	45.9475	13.8256	2.77161	9.15366	2.68174	2.09711	3.37406	7.38325	85.8407	193.354	2.8293	2.19013	20.1049	3.0934	4.14615
PVALB	1.00835	1.00046	1.01154	1.00778	1.00365	1.00168	1.00079	1.00627	1.01695	1.00682	1.01072	1.01154	1.00581	38.7093	1.01448	1.0151
PVRL3	95.5867	82.8161	51.6372	78.8521	21.207	8.92793	39.5222	2.93866	3.15764	23.1355	1.52697	7.73421	8.45838	15.8834	2.51446	5.75476
PVT1	147.452	7.95702	10.1091	12.6417	42.6797	68.9653	114.448	58.9617	29.2302	11.3922	6.24887	30.748	56.8181	5.66783	17.709	8.91962
PXDN	6.33844	2.58061	4.41429	4.25431	4.59864	9.85849	72.4998	3.17028	8.04764	7.29251	43.4374	4.21864	3.1536	3.90967	5.50637	6.19652
QKI	36.1115	2.9142	8.1396	4.57691	10.8663	7.40708	79.9947	4.84665	342.01	633.014	299.397	578.223	924.118	270.405	280.213	362.303
RAB3B	1.57954	1.51969	1.79325	2.46432	2.0029	2.97893	1.49187	1.36589	3.67416	7.88378	2.24209	2.18977	2.17623	2.11762	119.946	96.4429
RAB3C	2.98469	20.7638	8.37033	6.71005	18.9096	6.24042	27.2821	8.70283	147.963	80.9894	58.4237	361.741	245.52	70.4414	58.9102	123.818
RAB3IP	1.13834	1.21416	1.20544	1.37831	1.33186	1.62805	1.49379	1.07557	2.66764	2.36965	2.68373	35.3523	110.32	21.3966	6.51855	28.1621
RALYL	1352.11	1839.55	1384.45	2671.53	2555.63	2925.71	2692.51	2059.33	35.2609	12.252	18.8151	276.085	1123.31	10.8293	139.981	505.117
RAPGEF5	601.372	797.883	579.251	395.053	447.604	371.777	545.766	128.016	53.4036	20.2871	7.01405	18.3587	7.76496	396.427	62.3428	251.315
RARB	7.84583	198.869	37.4129	235.235	53.5325	6.52023	9.99492	4.84326	11.0923	160.177	259.755	12.5677	8.49634	97.0919	9.4181	10.28
RASAL1	19.553	2.35114	1.00011	4.55986	7.05429	32.013	45.4431	18.8164	1.00068	1	1	1	1.03555	1	1	1.00011
RASGEF1C	1.89063	14.1455	1.928	2.14568	4.92045	7.98778	21.6074	241.636	1.80722	3.99441	1.68889	1.96454	3.32566	3.5739	1.0502	1.81544
RASGRF2	188.516	131.9	19.4653	5.9653	6.6882	55.4215	27.1666	62.3129	22.8943	20.0635	4.6202	122.72	264.159	466.587	515.785	400.122
RBMS3	19.1024	9.30846	18.4798	14.806	10.2149	14.3243	11.2183	11.9169	90.2835	61.5257	188.227	634.598	358.149	385.862	475.781	397.606
RELN	11.5779	7.26701	16.7552	9.9839	10.5562	11.6149	9.54319	10.0361	41.0928	12.5622	25.8001	446.686	10.963	8.11166	21.5263	23.3707
RERG	2.91978	1.853	10.6447	2.97015	2.73362	2.40415	2.46647	8.60437	78.577	7.13516	175.514	31.464	264.89	2.38208	10.9457	5.72894
RFTN1	136.438	35.6032	31.8222	36.5421	18.3434	8.23165	19.0676	57.226	4.50376	5.19632	2.53686	6.64934	5.2517	3.79212	5.78315	3.71209
RGS12	82.1784	4.10704	3.26674	2.97171	3.00837	14.6437	9.97953	1125.77	433.461	880.684	531.683	149.553	58.7438	3.13914	3.49	4.61091
RGS16	1.02608	1.01187	1.09454	1.05881	1.04178	1.03268	1.02018	1.03302	1.50847	1.1579	27.8291	1.15125	1.04501	1.01586	1.10961	1.10625
RGS2	1.14875	1.09552	1.43983	1.31905	1.20586	1.11586	1.14135	1.09093	1.39372	23.2903	1.70039	1.25795	1.11724	1.08467	1.41467	1.38115
RGS4	70.5942	63.6755	168.686	150.251	126.776	25.5682	57.8533	1.33237	2.68099	91.5022	2.52503	1.5508	1.79763	146.434	15.9857	27.3396
RGS5	1.23678	1.15189	1.33999	1.27318	1.20038	1.14164	1.12353	1.287	1.70511	1.37461	1.37871	1.32508	1.20594	163.429	1.53828	1.62573
RGS6	879.332	657.771	536.796	194.274	568.4	110.419	674.725	17.0974	391.675	135.816	851.35	40.3724	21.2164	16.5874	44.5189	67.6874
RHBDL3	5.14405	43.0643	23.3423	4.04355	38.2946	13.414	4.53058	1.97847	2.60402	2.03413	4.19943	3.94245	2.49706	3.74338	1.99058	2.86417
RILPL1	15.844	49.7504	12.2016	24.5765	18.1498	14.9589	91.6616	252.146	6.51175	10.0498	8.85202	6.7777	9.46755	12.6382	8.0554	6.94252
RIMS3	75.5356	122.722	196.532	161.252	87.312	5.17625	25.6631	209.472	30.0466	23.4854	7.03506	42.7633	66.5727	18.0136	4.62506	27.5864
RNF144B	1.43012	1.30011	1	1.01396	1.18303	1.2117	1.13155	1.14522	1.32195	2.35591	3.64025	1.43779	1.20465	22.6161	1.53712	2.13985
RNF152	3.24408	1.82011	4.51662	2.9939	2.58848	3.11533	2.65353	60.616	5.99521	3.43889	8.5549	3.6521	2.70907	3.70196	95.5698	17.5897
ROBO1	341.157	21.1891	63.0093	17.4257	18.3119	498.936	483.936	177.654	1063.14	1566.9	1739.21	155.595	75.301	140.394	1239.26	1186.46
ROR1	2.1397	2.0599	3.32368	2.64564	1.9399	2.51687	2.16901	2.36296	4.06284	2.39789	3.14459	2.27445	45.8679	125.209	4.60152	5.80064
RORB	2.79835	544.399	663.559	927.45	384.848	2.45035	4.44525	1.92184	3.13013	2.53494	2.4799	3.10557	2.38565	2.23172	2.76664	5.0275
RSPO2	47.8057	45.3688	150.878	128.833	48.3077	89.3496	13.5611	9.85246	28.1147	14.6893	20.654	20.1369	15.6845	76.15	59.0271	96.6097
RTKN2	2.04653	7.18774	9.99572	2.47309	2.00053	1.37899	1.61314	1.14436	1.38288	1.26203	1.41754	1.31752	1.14721	1.13854	1.62324	1.4338
RTN4RL1	94.1583	178.772	21.1307	32.5827	54.7417	9.19569	359.374	116.048	5.06543	14.4325	22.2431	6.21338	6.15209	48.7072	6.26368	12.1975
RUNX2	6.36609	4.07003	6.52576	4.30296	12.0735	6.41853	5.48087	4.86137	7.81779	4.9849	4.57209	37.0633	18.7839	134.817	24.6429	19.0748
RXFP1	2.80757	12.4165	3.26331	57.9039	265.967	85.6738	111.151	131.085	4.83674	2.78089	3.18681	2.8491	3.00588	2.79632	3.4131	2.68979
RYR3	21.661	76.8079	25.5494	14.6594	9.97006	664.047	82.9457	12.6596	36.3299	74.3697	1041.54	6.18992	5.1907	3.53683	8.83791	24.0756
SALL1	1.18127	1.07991	1.48133	1.30123	1.25221	1.15904	1.12212	1.17063	3.22769	17.9947	22.0685	1.55043	1.18434	1.09512	1.57322	1.44899
SAMD5	4.35584	2.50317	10.0837	4.40243	20.6101	8.3986	50.6353	13.3571	11.4615	4.61447	4.82022	11.0406	4.37935	147.09	5.039	43.3167
SAT1	1.88721	5.9672	1.54793	4.09838	5.50792	3.0219	2.2265	3.19488	1	1.7473	1.58677	18.694	19.4971	124.901	4.16712	13.4439
SATB2	266.058	273.16	238.966	383.262	209.592	126.543	376.16	851.146	2.58448	1.77185	2.41842	2.44875	2.21041	2.2456	2.91637	4.04693
SCG2	7.76701	3.84995	7.45537	28.9201	15.2948	1.33005	4.94588	7.53984	446.84	108.763	254.091	170.833	21.9021	16.2991	147.993	55.7224
SCN1B	1.43998	1.57546	36.4957	13.2307	6.1802	1	1.04759	7.35005	1.08781	3.28294	3.81695	2.57293	5.39714	24.0882	1	2.4716
SCN9A	1	1.24653	4.11978	4.55512	1.03122	1	1	1	1	1	1	1	3.78147	33.3247	1.4148	2.22604
SCPEP1	1.50051	35.748	1.64778	1.85935	4.49648	5.38277	15.2227	6.00458	1.29308	2.21787	1.881	13.3836	6.38218	2.54743	1.02429	1.01199
SDK1	32.0579	16.1907	36.8895	21.6437	19.4906	407.891	21.4821	49.7545	1173.35	612.032	621.651	94.1327	1073.63	1206.35	45.86	75.0692
SDK2	4.88308	3.47509	5.21956	4.93836	4.54878	102.299	66.884	5.69086	68.1567	39.9113	6.38188	6.47844	3.65104	3.69877	7.46089	6.39402
SEC24D	6.0674	6.35619	2.22706	7.16388	26.257	82.7143	82.6459	2.17195	1.88959	1.01864	1.7112	1.30629	1.31996	1.31032	1.99223	1.86057
SEMA3A	8.24366	4.97881	29.1155	23.5458	26.3829	161.436	45.6355	12.1259	13.0352	8.81953	10.8852	9.51413	5.72409	5.72065	15.783	22.7125
SEMA3E	2.27769	1.60418	2.15442	2.30637	3.86228	258.232	1.52695	1.46772	2.42666	2.05483	1.69163	2.07209	1.77435	1.67193	1.66993	2.80836
SEMA4A	1.45182	1.19589	1	1	1.71198	8.37646	2.3568	1.08011	1.043	1.84308	1.81115	1.01188	1	1	1	1.24898
SEMA4D	120.776	382.03	84.7758	125.305	95.7412	191.322	353.853	146.737	22.8864	8.46825	20.952	11.4144	10.9382	9.19854	7.55343	25.4412
SEMA5B	55.4337	1.38016	10.8763	10.6351	2.30475	161.126	16.668	10.5374	4.3895	1.5283	1	3.35546	14.7066	1.39605	1	1.94104
SEMA6A	1.1135	37.7752	3.80398	1.54486	1.64003	1.65392	2.09099	1.14354	4.20632	1.4121	1.74824	33.0139	12.2469	1.30679	53.2404	22.8967
SEMA6D	88.7326	318.174	288.705	221.854	15.3808	22.878	15.9108	608.542	310.204	19.5276	166.395	181.692	1338.59	16.8912	42.4532	101.022
SERPINE2	89.9178	1.21976	1.55873	1.54054	1.30563	2.56517	14.9636	2.56213	2.33311	1.23071	1.28728	6.86275	1.63137	1.43239	1.42354	1.45616
SFRP1	6.79416	4.39195	10.3841	7.33256	5.76685	7.60097	7.40726	6.6181	12.2281	9.08614	22.1588	16.7332	294.342	7.10672	12.8857	13.17
SFTA1P	7.77767	17.0693	1.8238	4.15457	12.9819	7.91485	29.3659	5.64846	1.00079	1	1.00046	1.00034	1	1	1.00079	1.00079
SGCZ	78.3813	353.562	232.947	193.963	306.327	786.162	830.858	1073.79	763.65	33.0421	1062.92	2800.54	5727.84	1331.21	10559.7	723.19
SGK1	34.1933	7.10427	11.731	19.2755	42.298	147.665	53.3733	20.6793	266.149	136.783	27.9779	485.049	335.96	137.934	12.1442	12.2546
SHISA6	13.9144	30.7627	25.4965	23.6349	44.1892	21.8216	54.8357	93.2281	144.368	395.98	45.3707	47.5807	119.694	38.7708	44.3923	196.168
SHISA8	1	1	1	1	1	1	1	1	1	1.50834	95.6196	1	1	1	1	1
SHROOM3	15.3779	86.0274	22.952	11.8302	17.0165	33.4617	8.42589	20.9792	6.28621	3.63406	4.16379	3.7541	4.83887	3.69658	7.32785	8.5115
SLC12A7	1	1	1.00023	1	1.00062	1	1.05216	1	1.00046	1.00011	38.2992	1	1	1	1.00034	1.00023
SLC17A6	2.15293	1.18474	8.30552	1.75941	1.01528	1.01022	1.00519	1.19705	1.03302	1.01683	1.03067	1.01386	1.00869	1.00988	1.03217	1.04347
SLC17A7	390.784	328.376	481.738	619.787	455.991	243.498	340.113	318.471	2.50881	1.18896	1.12896	2.60935	1.68841	1.36238	2.12997	2.73517
SLC22A10	47.7638	5.14971	6.78938	197.914	118.1	63.1537	46.3326	5.6075	1.91395	1.47512	1.80706	2.00709	1.52465	1.4147	1.8319	1.84839
SLC22A24	13.7997	1.28055	1.5727	44.8549	31.3019	12.2421	4.76465	2.21848	1	1	1	1	1.06597	1.08682	1	1.10409
SLC22A3	1.16775	1	1.00023	1	1	1	1	1.12145	1.00011	1.53046	49.1158	1	1	1.00716	1	1
SLC22A6	8.46518	1.43966	1.81612	23.7837	10.9802	14.5232	2.48583	1.7957	1.00051	1.17071	2.19939	1.16701	1.35373	1.23763	1.00046	1.14241
SLC24A3	2.96105	2.71418	4.60884	3.78294	3.53877	3.81867	3.25336	3.0228	266.468	136.268	945.105	114.908	59.8105	5.93227	395.043	182.538
SLC24A4	100.556	2.73744	13.7743	1.93034	1.90775	1.58161	16.645	177.021	11.8542	2.87977	157.809	2.01733	16.8221	1.49069	221.551	9.22695
SLC26A4	2.0684	8.58161	1.41994	2.37173	3.9625	1.41209	12.5062	20.6951	1.99615	2.09612	2.06647	1.68616	8.51399	47.003	1.43776	3.4578
SLC30A3	16.462	45.2013	42.0808	41.0407	42.2703	1.04376	49.3954	1	1	1	1	1	1	2.82889	2.06405	1
SLC35F3	318.302	363.479	123.68	260.16	347.612	547.315	1164.86	30.8712	45.1807	388.268	98.3009	59.4836	60.3413	99.3194	30.2479	44.2252
SLC35F4	3.36684	2.14185	5.10454	2.76914	2.57262	2.75361	3.11442	3.92163	89.7251	37.8292	156.457	53.6282	275.931	33.328	3.97468	6.34508
SLC38A11	34.0697	156.992	159.764	123.432	3.28097	1.63015	2.07098	1.46153	1.8373	1.44045	1.67215	1.49458	1.24246	1.87189	1.64213	1.89697
SLC39A11	79.0723	34.7357	34.7823	16.2114	194.185	165.506	284.335	164.818	23.8564	13.3926	23.1576	31.2135	30.116	14.1138	22.6968	24.1537
SLC45A2	1	1	1	1	1	1	1	1	1	1	1	1	1	1	23.6221	1
SLC6A1	1.40688	1.01856	1.09961	1.34728	1.10186	1	1.09165	1.13872	483.865	451.781	1124.42	4255.19	1642.9	536.424	336.984	468.815
SLC6A11	5.20901	2.23195	4.29873	2.22357	2.36169	3.70148	3.36712	2.83976	5.19668	6.6437	85.2829	13.752	9.5836	2.47422	3.96239	3.70617
SLC6A7	69.8431	39.1278	41.8541	63.5216	68.7743	4.22962	47.2259	5.09707	1.25051	1.01651	1.30988	1.02194	1	1.36311	1.05973	1
SLC7A11	1	1	1	1	1	1	1	1	1	32.8104	1	1	1	1	1	1
SLC9A9	3.91904	2.5315	6.82981	3.01358	27.4417	4.30793	4.33178	12.0695	6.00244	5.93559	6.83619	2.77178	2.64843	541.321	9.3224	67.5654
SLIT1	70.5119	227.051	6.81999	419.712	325.621	443.58	352.427	652.69	4.28214	5.17905	233.606	2.51502	3.04984	82.05	1.85781	9.73189
SLIT2	168.426	210.248	151.209	62.7161	9.35903	6.45989	7.19066	10.8438	27.1797	5.58863	6.50963	118.609	1253.45	825.48	8.89403	134.699
SLIT3	233.803	16.018	7.98591	4.59165	16.5386	359.44	686.011	5.57704	7.47534	6.0174	5.38846	6.65386	5.5482	4.03547	4.90704	6.68188
SMAD3	171.363	43.725	21.1093	19.2823	3.36713	57.8255	138.97	45.7548	2.06567	2.54153	2.11809	3.88855	3.04209	2.59037	3.29838	2.84837
SMOC1	1.04368	1.00542	1	1	1.0912	1.20162	1.00764	1	2.01095	1	1.00577	1	1	1.01425	1	1
SMYD1	1	1	1	1	1	1	1	38.145	1	1	1	1	1	1	1	1
SNCA	21.3769	55.2663	57.0201	74.5005	102.319	160.779	203.462	87.8574	3.97144	12.4632	1.11873	2.53947	3.6667	1.61905	6.74196	4.41098
SNTB2	31.0038	17.773	11.663	17.8985	9.97182	44.4846	194.951	63.0563	8.99303	3.59143	5.35923	9.78023	7.70548	8.92835	12.4452	12.7064
SORBS2	732.672	555.575	358.786	320.007	166.25	882.455	309.595	1942.35	114.274	68.0441	30.981	111.713	27.7627	146.502	603.57	323.979
SORCS2	92.8981	15.0477	23.8145	42.3313	205.919	46.4225	12.1984	9.18432	12.8225	9.07099	9.07118	36.5592	48.2644	22.4772	11.3434	20.9478
SOWAHA	2.8483	1	1	1	1	1	1	1	1	1	1	1	1	1	1	1
SOX13	1.2176	1.17511	1	1.1514	1.04485	1.26509	1.01403	1.25152	1.12508	1.10554	1.69678	43.5546	28.4437	1.10334	1	1.66519
SOX2-OT	25.8106	15.7516	30.3563	31.2179	29.9884	74.8601	25.1557	24.5351	518.284	28.9635	108.396	1156.65	1413.7	323.145	576.601	229.688
SOX5	25.2596	218.491	24.7977	118.687	21.1656	161.38	444.135	735.106	27.1797	6.20057	21.3377	174.589	35.7144	106.841	137.175	31.9632
SOX6	14.3665	9.68172	20.1395	15.4379	15.6922	16.5209	15.1151	14.7845	21.8148	17.1662	20.4954	18.3075	226.684	1086.97	945.801	753.607
SPARCL1	117.202	575.915	742.244	1059	331.427	382.635	283.034	414.492	11.0415	28.07	4.82617	17.1538	333.386	1820.17	620.123	642.573
SPHKAP	1.5284	61.1552	3.11678	1.45945	9.37559	15.9103	1.61491	1.73886	2.23712	1.78722	2.05628	214.603	538.616	3.60791	4.7737	7.94365
SPOCK3	6.97148	3.15108	8.25871	5.03826	4.39326	11.1899	4.05634	247.122	425.904	322.23	409.19	46.0599	7.29116	1039.35	1169.98	996.794
SST	1.01453	1.00485	1.03784	1.02285	1.01498	1.01436	1.00891	1.01386	1.05879	1.02095	1.04174	1.07207	1.01375	1.00846	190.449	20.4109
ST6GAL1	5.75409	91.365	6.79641	34.6182	49.2065	39.4559	75.4777	2.95924	3.24369	4.50934	4.50556	3.93574	20.1193	13.7147	3.98365	6.79877
ST6GAL2	5.71536	46.5269	45.424	104.983	110.221	74.6473	54.0185	5.53315	3.2152	1.26215	1.65986	37.3198	100.894	1.59149	9.04624	2.24465
ST6GALNAC5	478.848	804.028	55.8523	221.529	561.024	57.5903	377.297	2.77489	44.1116	2.10268	2.78508	5.32046	327.239	274.579	4.42513	492.364
ST8SIA4	1.27152	1.22761	3.25832	9.18092	1.08082	1.35526	2.35155	1.2742	1	1	1	2.54933	29.6659	106.443	23.8435	15.8322
STARD13	5.40882	64.6019	29.5673	23.2762	122.267	270.223	103.367	119.696	64.1792	114.725	204.84	3.56782	2.84988	77.8541	12.8346	35.1025
STK32B	3.39153	3.26699	3.34349	3.79951	3.66967	3.22074	3.19576	96.9499	5.30844	6.49306	4.88593	2.92	2.88858	3.6279	80.054	4.11772
STK32C	9.68207	37.3216	5.36234	16.8113	25.878	23.5779	55.5063	186.225	5.70453	8.23526	5.84427	5.23637	6.79643	9.31438	7.02027	9.30152
STMN1	37.7867	38.7722	205.916	227.442	135.018	13.7188	40.4424	41.692	27.7516	17.3908	3.416	70.516	29.6289	26.5618	24.83	44.7282
STXBP6	99.8357	1.56994	4.02061	6.97998	1.84395	3.1967	1.74957	1.74151	4.36957	3.21556	2.37138	2.87832	2.11086	93.0127	259.086	327.674
SULF1	2.96	2.03541	4.32039	2.54685	2.16724	13.8577	2.60294	3.35983	4.4583	3.25356	3.57829	3.4803	24.0751	132.498	4.99696	6.64844
SV2B	651.098	661.311	380.865	790.839	938.912	1005.53	797.283	436.701	5.09013	5.18614	6.4389	3.93502	4.4145	3.07014	5.1378	5.67134
SV2C	3.43776	2.92175	4.65661	3.39712	3.6057	3.46797	3.59741	3.20789	5.18767	4.69734	4.8814	382.677	369.374	3.15754	4.47605	4.10792
SYNPO2	22.4527	79.3005	85.2232	48.7432	110.757	195.086	112.331	8.3418	10.5879	9.5505	3.05145	11.1365	4.64565	6.25893	9.43955	6.31169
SYNPR	3.49102	208.176	23.3185	11.3733	4.28076	8.41341	4.40513	493.006	669.84	1313.16	1291.27	123.528	103.703	4.79324	640.798	700.819
SYT17	10.4013	2.83511	2.37803	2.68215	4.58325	2.32385	22.3392	2.18007	56.0495	214.997	6.745	6.94731	2.09779	16.8261	3.01247	4.80792
SYT2	3.57708	3.25147	13.124	2.63013	4.83887	6.5076	3.42405	6.16765	2.91051	2.50132	88.6509	2.50586	5.10453	5.95178	5.36148	4.35387
SYTL2	73.2369	99.783	38.4873	75.2569	31.3137	42.0274	116.178	8.6412	5.10503	63.7827	4.27123	3.52872	3.75876	6.25125	6.62311	7.2388
TAC1	1	1	1	1	1	1	1	1	1	1	1	1	79.2778	301.065	1	1.3587
TAC3	1	1	1	1	1	1	1	1	1	1	9.89032	1	1	1	1	1
TACR1	1.30263	1.33489	1.32464	1.50168	1.28851	2.10131	1.20464	1.37033	4.17296	2.06645	1.13368	75.7015	98.6029	39.1339	29.4815	2.60912
TCERG1L	24.7123	221.286	3.27059	45.6804	52.765	12.4546	3.85341	2.51407	3.2235	1.90717	2.50044	33.484	2.98064	2.2822	4.31545	2.88966
TDRG1	22.8881	1.34274	1	1	2.41653	1.38878	10.9948	27.939	1	1	25.7009	1	1	1	1	1
TESC	10.3748	14.5463	8.24873	3.03316	9.28598	12.1479	11.1308	176.816	2.20686	1.83778	1.88343	2.25304	1.84259	1.92707	2.41301	3.01561
THEMIS	2.64092	2.12729	3.87294	2.46786	4.68269	2.70323	51.0175	116.764	3.34469	2.23403	3.02291	2.88937	2.02999	2.35977	3.09797	3.64705
THSD7A	38.6241	16.8137	30.901	3.43861	2.06271	2.12697	2.09382	2.08374	330.201	181.452	789.698	30.0175	115.256	80.4735	550.603	151.976
THSD7B	11.2238	6.98791	18.2043	10.8832	9.24579	10.2387	12.4569	13.1805	356.82	11.9647	18.8042	32.5705	17.5265	8.76604	19.3765	20.3227
TIMP2	2.27718	6.71672	1.7657	2.89261	3.23841	1.65532	2.23397	1.85284	150.689	150.22	75.9912	5.32902	77.7446	125.239	75.4493	121.16
TLE4	28.4127	31.2912	44.5031	31.7233	37.3365	741.866	11.4376	65.7464	19.9551	12.3475	15.4958	14.7345	7.782	23.023	16.9254	23.6144
TLL1	2.74555	3.99246	3.53046	2.90816	155.181	3.79802	2.79076	5.18888	4.62351	2.51982	3.98575	3.41573	2.49171	2.63358	3.56246	3.60835
TMEM132C	3.75981	19.6891	7.56977	4.67895	8.24652	3.56797	3.66326	4.03274	7.52752	6.25685	5.2566	35.0741	46.8567	607.627	237.832	31.9126
TMEM163	11.2151	46.3203	36.0427	10.4441	6.99508	37.0006	15.4619	155.452	10.0021	5.47375	37.4838	3.74118	4.08221	5.45967	11.2622	9.71736
TMEM2	67.1384	7.169	9.4893	6.97313	13.2183	98.7216	75.5907	44.2495	7.14576	7.15343	7.44933	6.07446	4.73569	5.63229	8.81041	13.7878
TMEM47	1.00313	1.00046	1.01862	1.00046	1.00046	1.00023	1.00079	1.01386	2.37245	1.00157	1.00157	1.00255	2.01362	2.53974	7.71922	24.0219
TNNT2	1.03925	9.2377	1.11765	20.2209	1.07815	1.04501	1.05635	1.05526	1.10732	1.03902	1.10291	1.06329	1.03093	1.01627	1.10803	1.08442
TNS3	3.36001	2.28258	2.90821	2.80041	2.33627	2.70747	7.1837	2.67527	4.93967	42.322	4.00957	2.62423	2.15944	2.5814	3.42451	3.61815
TOX	12.2802	61.0222	76.0277	288.972	404.274	234.182	11.2494	9.33001	20.0581	8.32635	11.4633	97.5868	997.913	11.0259	19.8909	29.6192
TOX3	1.2846	1.14963	1.14135	1.14697	1.26422	1.44433	1.49699	1.07448	24.636	1.07465	3.52104	76.0551	44.4553	49.8317	63.3198	83.1045
TRHDE	10.1329	1363.96	128.737	408.087	81.8076	3.3507	46.4064	423.326	7.56452	9.20941	6.97525	2.75224	3.56716	3.16226	115.024	145.884
TRIM67	1.22566	1.11719	1.41742	1.23345	1.23142	1.34064	1.34895	1.26015	3.77679	1.59584	2.13232	1.49993	1.70814	2.55665	17.1782	10.1862
TRPC3	1	1.94467	53.6799	1.29835	1.4812	1.37212	1.0587	2.5308	1.02763	1.10545	1	233.268	87.6733	1.11835	1.47867	1.2917
TRPC4	2.55866	1.52416	2.10765	2.10923	1.53748	2.14618	3.52915	61.5071	3.31793	13.1334	1.16419	1.60004	1.72505	63.5934	67.8708	13.1648
TRPC5	12.628	27.7359	8.17588	37.593	4.25136	3.16453	34.8512	144.018	5.16795	5.18934	4.87359	25.0907	25.8439	102.492	4.00152	9.31446
TRPC6	3.1749	2.44677	3.09719	2.32332	2.35161	4.6468	2.29559	2.59231	2.95023	3.51324	12.6005	3.19723	8.54595	2.70255	41.4542	17.2417
TRPM3	84.1077	232.842	295.193	109.149	313.366	1001.6	56.5432	8.32975	26.9077	212.847	25.6142	15.4481	10.0705	41.45	19.7566	50.3667
TSHZ2	2.83573	3.16679	3.02363	620.123	46.7787	3.45456	4.03012	2.15825	8.96814	8.53129	145.553	2.95005	1.96959	2.37483	3.68127	2.38399
TSHZ3	8.12576	42.2884	45.5547	85.6764	26.1287	41.8157	14.4382	1.64993	2.10119	2.8267	2.16762	1.54556	2.10653	117.305	59.6967	99.2279
TYRO3	99.0335	29.01	25.1231	37.6258	19.8384	42.5658	85.0544	37.2008	2.15826	1.42516	2.04096	2.29792	1.58816	1.46403	2.07596	1.43251
UBASH3B	27.7745	2.88091	7.79715	7.31565	9.7038	4.6246	5.66387	20.1155	177.843	147.68	128.412	390.167	571.42	54.9125	111.533	178.448
UTRN	13.0578	45.0422	59.3617	15.4794	24.8929	35.1958	12.5017	17.3815	23.6183	11.3881	15.5167	149.597	220.6	42.3966	38.1504	167.065
VAV2	6.47914	4.11593	9.27443	5.99444	14.4565	115.391	5.28519	4.65227	21.705	18.4076	32.3507	102.483	411.73	161.312	177.963	192.689
VAV3	6.11791	6.81524	113.432	5.82674	3.13028	3.6355	3.96115	3.33584	8.48053	5.33447	4.45171	5.1036	391.81	10.7738	6.99257	6.63277
VGF	3.65405	1.03914	1.33474	5.5033	1.15542	1.03121	1.54041	1.04285	1.16041	1.09708	25.1692	1.07626	1.04762	1.42934	80.7804	3.21189
VIP	1.02658	1.00994	1.07163	1.04458	1.04042	1.02385	1.01582	1.02376	1.49914	44.4399	199.155	1.05033	1.02574	1.0142	1.09277	1.07448
VWC2	1.00011	16.0639	6.27901	20.2746	5.84692	1	1	28.0839	62.1353	55.9359	16.0452	41.0588	115.685	131.925	144.138	42.7834
XKR7	1.81621	2.40495	1.35372	1.15136	5.04823	8.65329	9.55428	49.1022	1.37574	1.97706	2.76761	1.21266	1.21351	1.93929	1.30885	1.60363
XYLT1	137.232	266.654	47.7231	70.3356	137.182	236.934	282.692	12.4665	10.9391	5.82055	11.509	8.51219	6.48452	74.9044	21.6879	54.281
ZBTB20	14.1984	11.3823	19.084	8.0381	8.57097	16.9648	9.85353	11.847	129.229	9.9826	50.4531	150.474	85.0974	17.1505	781.4	78.1767
ZBTB7C	38.9179	14.0163	52.9961	9.55648	2.82243	4.14793	3.20394	3.30562	3.48729	2.48462	5.13537	2.28725	17.012	2.30347	2.56985	4.00141
ZFHX3	6.09423	4.63356	9.52536	4.97942	4.05456	96.9946	5.57484	5.95139	7.90055	12.2822	9.19078	5.02531	3.88734	5.2784	8.4368	8.54405
ZFPM2	126.334	99.8198	114.768	75.6976	86.5004	425.319	125.868	4.54557	21.7838	56.7234	18.5818	8.90389	6.3125	86.1019	65.0783	13.7227
ZNF365	107.842	150.716	210.578	100.612	55.1348	120.816	90.2835	256.602	12.4493	3.65559	23.8839	10.0867	5.31209	6.65197	36.8899	12.9095
ZNF385D	27.5368	16.256	50.2965	29.5234	23.1652	107.322	45.9921	86.8024	1097.25	1123.06	496.422	1001.66	1146.41	1746.44	1877.73	1349.81
ZNF536	40.3494	43.6226	58.0966	55.1348	55.172	71.5526	60.9792	55.1225	917.68	651.098	362.173	965.318	1553.73	794.074	201.289	230.841
ZNF608	4.82958	2.22183	1.6904	1.75395	1.42583	1.28927	1.67617	1.48714	155.697	99.9415	109.276	39.4095	77.8841	30.8084	119.313	90.9978
ZNF697	2.77123	1.81145	2.47259	1	1.19456	1	2.49331	18.7033	1	1.32291	1	1	1	1	1	1
ZNF804A	78.9633	12.5307	19.9451	8.28452	9.69987	16.0958	114.117	526.335	68.3111	126.838	734.06	14.871	21.5751	1226.94	167.882	54.894
ZNF804B	26.5933	205.34	58.0976	234.924	8.49051	40.7048	626.799	1839.55	23.665	15.0945	8.58448	51.0613	618.717	14.363	179.396	13.3362
